# Supplementary material
Source: Research Square preprint supplement (doi:10.21203/rs.3.rs-10181530/v1)
Supplement: Supplementary file 1 [file 14e1913b613a6afb24bfa761.xlsx]

## Sheet: 01_README
Supplementary Data Workbook — Whose Energy Transition?
Machine-readable companion to Supplementary Materials document. Every dataset, processed panel, and result table used in the manuscript is here. Sheet names correspond to file names in the supplementary repository.
Manuscript metadata
Manuscript	Whose Energy Transition? Aggregation bias, sample selection, and post-shock renewable-capacity deviations among established adopters
Authors	Saumitra Saxena, Bassam Dally (Clean Energy Research Platform, PSE, KAUST)
Corresponding	saumitra.saxena@kaust.edu.sa
Version	v4.2 (Nature Energy Analysis format, June 2026) — synchronized with official World Bank FY2026 income classification, exploratory structural regressions, fixed-seed bootstrap, and SVAR verification
Data window	Stock outcome: 2000-2024 (IRENA capacity). Monthly time series: 2000-01 to 2026-04.
Source license	All sources CC-BY-4.0 or public-domain government data
Code language	Python 3.10 (pandas, numpy, statsmodels, scipy, matplotlib)
Sheet directory
Sheet	Description
01_README	This sheet (v3.5, Nature Energy Analysis format).
02_DataSources	Provenance, URLs, access dates, license for every input source.
03_AnnualPanel_Capacity	Country×year Solar (total) + Wind (total) installed capacity panel: 222 ISO entities, 4,269 non-missing rows (2000-2024).
04_GlobalCapacity	Global IRENA capacity by technology, 2000-2024.
05_MonthlyPanel	Monthly panel 2000-01 to 2026-04 (selected columns shown; full 40-column CSV in /01_data/processed/monthly_panel.csv).
06_OilRents	World Bank oil rents (% GDP), country×year, 1970-2021.
07_AlignmentScores	UN voting ideal-point alignment scores (2025 vintage).
08_CountryQuarter_Gen	Ember country×quarter electricity generation panel (full panel, all rows).
09_Results_AggregateStock	Table 1 main: three measures × 4 shocks × 3 horizons (stock outcome, Solar total + Wind total).
10_Results_AggregateAdditions	Same as 09 but using annual capacity additions outcome.
11_Results_Decomposition_G	PRIMARY G-based decomposition: G − μ (concentration) and μ − m (skewness). Matches main paper §5.2 and SI §S4.5.
11_archive_StockWtd_Decomp	DEPRECATED pre-shock-stock-weighted mean decomposition. Mathematically distinct from the true aggregate G. Retained for transparency only — see banner on sheet.
12_Results_Placebo_Loose	Loose placebo (8 non-shock years), provided for transparency. Some years (e.g., 2015, 2024) have windows that overlap real shocks.
12b_Results_Placebo_Strict	Strict 2-year buffer placebo (n=4): 2004, 2005, 2011, 2017.
13_Results_LeaveOut_fixed2014	Leave-out using fixed 2014 top-N capacity countries. Retained as backward-compatibility column.
14_Results_Subgroups	Net exporter vs importer binary; Mann-Whitney p-values.
15_Results_Quartiles	Oil-rents quartile heterogeneity (supplementary heterogeneity table; not a main-text figure in v3.5).
16_Results_IHS	IHS-transformed event study (Appendix C, Table C1).
17_Results_WindowSens	Pre-shock window sensitivity: 4- and 6-year windows (2-year omitted; insufficient pre-shock observations).
18_Results_QtrGenValidation	Country-quarter generation cross-validation.
19_Results_SVAR_IRFs	Sign-restricted SVAR rotation exercise: impulse-responses with rotation-uncertainty intervals plus independent VAR(3)/VAR(1) verification notes. Not a Bayesian SVAR.
20_ConsistencyCheck	Core 132-row consistency-check report (132 of 132 pass as of v3.5) plus supplemental fixed-seed CI and SVAR lag-verification rows appended below the core checks.
21_CountryClassifications	Net oil exporter lists; alignment groupings; shock-specific top-5 by T-1 capacity.
22_CodeInventory	Python script names, line counts, purposes (updated for v3.5; repository line counts should be refreshed after DOI deposit).
23_SupplyChain_Concentration	Supply-chain concentration risk indicators (HHI by commodity); concentration-risk terminology retained.
24_Placebo_HorizonSpec	Horizon-specific placebo bands at t+0, t+1, t+2 under both window-clean (n=2) and strict 2-yr buffer (n=4) specifications.
25_LeaveOut_ShockSpec	Shock-specific top-N leave-out by T-1 capacity. Primary leave-out specification in the Nature Energy Analysis.
28_IncomeClass_FY26	World Bank FY2026 income/region classification crosswalk used in the exploratory structural regressions.
29_StructuralPanel	Country×shock×horizon structural-analysis panel with official FY2026 classification; 1,041 rows.
30_Table3_Coefficients	Main t+0, pooled-horizon and shock-specific regression coefficients with clustered/HC1 inference.
31_Robustness	Full exploratory structural-regression robustness battery used in Supplementary Table 6.
32_Diagnostics	Median regression, income×exporter interaction, shock-specific Spearman checks and outlier diagnostic.
33_Extension_Audit	Cross-document extension audit for the v4.2 main manuscript, SI and workbook.

## Sheet: 02_DataSources
02 — Data sources, provenance, and licensing
Every input data source used in the manuscript, with permanent URLs and access dates for replication.
Source	Variable	Period	License	URL	File	Accessed
FRED MCOILBRENTEU	Brent monthly spot	1987-2026	Public domain (US gov)	https://fred.stlouisfed.org/series/MCOILBRENTEU	MCOILBRENTEU.csv	May 2026
Caldara-Iacoviello	GPR index monthly	1900-2026	Public (academic)	https://www.matteoiacoviello.com/gpr.htm	data_gpr_export.xls	May 2026
World Bank Pink Sheet	Commodity prices	1960-2024	Public (WB)	https://thedocs.worldbank.org/.../CMO-Historical-Data-Monthly.xlsx	CMO-Historical-Data-Monthly.xlsx	May 2026
Ember MED	Country-month electricity	1999-2026	CC-BY-4.0	https://ember-energy.org/data/monthly-electricity-data	monthly_full_release_long_format.csv	May 2026
IRENA RES2025 via OWID	Solar total capacity (country×year); OWID slug contains "pv" but published variable is Total solar capacity	2000-2024	CC-BY-4.0	https://ourworldindata.org/grapher/installed-solar-pv-capacity	installed-solar-pv-capacity.csv	May 2026
IRENA RES2025 via OWID	Wind capacity (country×year)	2000-2024	CC-BY-4.0	https://ourworldindata.org/grapher/cumulative-installed-wind-energy-capacity-gigawatts	cumulative-installed-wind-energy-capacity-gigawatts.csv	May 2026
IRENA RES2025 via OWID	Global renewables by technology	2000-2024	CC-BY-4.0	https://ourworldindata.org/grapher/installed-global-renewable-energy-capacity-by-technology	installed-global-renewable-energy-capacity-by-technology.csv	May 2026
Harvard Dataverse	UN voting ideal points	1946-2025	Public (Dataverse)	https://dataverse.harvard.edu/dataset.xhtml?persistentId=doi:10.7910/DVN/LEJUQZ	dataverse_files.zip → Idealpointestimates1946-2025.csv	May 2026
WB Changing Wealth (NY.GDP.PETR.RT.ZS) via OWID	Oil rents % GDP	1970-2021	CC-BY-4.0	https://ourworldindata.org/grapher/oil-rents-as-a-share-of-gdp	oil-rents-as-a-share-of-gdp.csv	May 2026
USGS Mineral Commodity Summaries 2025	Mineral production/refining shares	2024 snapshot	Public (US gov)	https://pubs.usgs.gov/periodicals/mcs2025/	mcs2025.pdf	May 2026
World Bank Country and Lending Groups	FY2026 income groups and regions	FY2026	Public	https://datahelpdesk.worldbank.org/knowledgebase/articles/906519-world-bank-country-and-lending-groups	income_classification_fy26.csv	June 2026
International Energy Agency	Household electrification and affordability markers	2000, 2019, 2024	Public	https://www.iea.org/reports/household-energy-affordability	Published contextual values; no raw series used	June 2026

## Sheet: 03_AnnualPanel_Capacity
03 — Country×year Solar (total) + Wind (total) capacity panel
Built from OWID-IRENA. 222 ISO-coded entities, 4,269 non-missing country-year observations covering 2000-2024 (the 222×25 product equals 5,550, so the panel is unbalanced; rows with missing or zero stock are dropped before event-study fitting). Columns: country, iso3, year, solar_gw (IRENA Solar total — PV + CSP + off-grid), wind_gw (IRENA Wind total — onshore + offshore), solar_wind_gw, solar_ad…
country	iso3	year	solar_gw	wind_gw	solar_wind_gw	solar_add_gw	wind_add_gw	solar_wind_add_gw
Afghanistan	AFG	2009	2e-06	0	2e-06
Afghanistan	AFG	2010	0.000102	0	0.000102	0.0001	0	0.0001
Afghanistan	AFG	2011	0.00012	0	0.00012	1.8e-05	0	1.8e-05
Afghanistan	AFG	2012	0.016122	0.0001	0.016222	0.016002	0.0001	0.016102
Afghanistan	AFG	2013	0.016843	0.0001	0.016943	0.000721	0	0.000721
Afghanistan	AFG	2014	0.018363	0.0001	0.018463	0.00152	0	0.00152
Afghanistan	AFG	2015	0.019091	0.0001	0.019191	0.000727999	0	0.000727999
Afghanistan	AFG	2016	0.02116	0.0001	0.02126	0.002069	0	0.002069
Afghanistan	AFG	2017	0.023301	0.0004	0.023701	0.002141	0.0003	0.002441
Afghanistan	AFG	2018	0.023076	0.0004	0.023476	-0.000225	0	-0.000225
Afghanistan	AFG	2019	0.052591	0.0004	0.052991	0.029515	0	0.029515
Afghanistan	AFG	2020	0.052013	0.0004	0.052413	-0.000578001	0	-0.000578001
Afghanistan	AFG	2021	0.052186	0.0004	0.052586	0.000172998	0	0.000172998
Afghanistan	AFG	2022	0.053956	0.0004	0.054356	0.00177	0	0.00177
Afghanistan	AFG	2023	0.053956	0.0004	0.054356	0	0	0
Afghanistan	AFG	2024	0.053956	0.0004	0.054356	0	0	0
Albania	ALB	2001	0.0001	0	0.0001
Albania	ALB	2002	0.0002	0	0.0002	0.0001	0	0.0001
Albania	ALB	2003	0.0002	0	0.0002	0	0	0
Albania	ALB	2004	0.0002	0	0.0002	0	0	0
Albania	ALB	2005	0.0002	0	0.0002	0	0	0
Albania	ALB	2006	0.0002	0	0.0002	0	0	0
Albania	ALB	2007	0.0002	0	0.0002	0	0	0
Albania	ALB	2008	0.0002	0	0.0002	0	0	0
Albania	ALB	2009	0.0003	0	0.0003	0.0001	0	0.0001
Albania	ALB	2010	0.0004	0	0.0004	0.0001	0	0.0001
Albania	ALB	2011	0.000564	0	0.000564	0.000164	0	0.000164
Albania	ALB	2012	0.000679	0	0.000679	0.000115	0	0.000115
Albania	ALB	2013	0.000758	0	0.000758	7.89999e-05	0	7.89999e-05
Albania	ALB	2014	0.000874	0	0.000874	0.000116	0	0.000116
Albania	ALB	2015	0.00105	0	0.00105	0.000176	0	0.000176
Albania	ALB	2016	0.001	0	0.001	-5e-05	0	-5e-05
Albania	ALB	2017	0.001	0	0.001	0	0	0
Albania	ALB	2018	0.001	0	0.001	0	0	0
Albania	ALB	2019	0.014	0	0.014	0.013	0	0.013
Albania	ALB	2020	0.021	0	0.021	0.007	0	0.007
Albania	ALB	2021	0.023	0	0.023	0.002	0	0.002
Albania	ALB	2022	0.10014	0	0.10014	0.07714	0	0.07714
Albania	ALB	2023	0.206734	0	0.206734	0.106594	0	0.106594
Albania	ALB	2024	0.306734	0	0.306734	0.1	0	0.1
Algeria	DZA	2010	0.025	0	0.025
Algeria	DZA	2011	0.025	0	0.025	0	0	0
Algeria	DZA	2012	0.025	0	0.025	0	0	0
Algeria	DZA	2013	0.025	0	0.025	0	0	0
Algeria	DZA	2014	0.0283	0.0102	0.0385	0.0033	0.0102	0.0135
Algeria	DZA	2015	0.06174	0.0102	0.07194	0.03344	0	0.03344
Algeria	DZA	2016	0.26174	0.0102	0.27194	0.2	0	0.2
Algeria	DZA	2017	0.35474	0.0102	0.36494	0.093	0	0.093
Algeria	DZA	2018	0.36674	0.01	0.37674	0.012	-0.000199999	0.0118
Algeria	DZA	2019	0.36674	0.01	0.37674	0	0	0
Algeria	DZA	2020	0.36674	0.01	0.37674	0	0	0
Algeria	DZA	2021	0.36674	0.01	0.37674	0	0	0
Algeria	DZA	2022	0.4508	0.01	0.4608	0.08406	0	0.08406
Algeria	DZA	2023	0.4618	0.01	0.4718	0.011	0	0.011
Algeria	DZA	2024	0.4618	0.01	0.4718	0	0	0
American Samoa	ASM	2012	0.002416	0	0.002416
American Samoa	ASM	2013	0.002416	0	0.002416	0	0	0
American Samoa	ASM	2014	0.002416	0	0.002416	0	0	0
American Samoa	ASM	2015	0.002416	0	0.002416	0	0	0
American Samoa	ASM	2016	0.00392	0	0.00392	0.001504	0	0.001504
American Samoa	ASM	2017	0.00427	0	0.00427	0.00035	0	0.00035
American Samoa	ASM	2018	0.00516	0	0.00516	0.00089	0	0.00089
American Samoa	ASM	2019	0.00481	0	0.00481	-0.00035	0	-0.00035
American Samoa	ASM	2020	0.00481	0	0.00481	0	0	0
American Samoa	ASM	2021	0.00481	0	0.00481	0	0	0
American Samoa	ASM	2022	0.00711	0	0.00711	0.0023	0	0.0023
American Samoa	ASM	2023	0.00711	0	0.00711	0	0	0
American Samoa	ASM	2024	0.00711	0	0.00711	0	0	0
Andorra	AND	2014	0.000186	0	0.000186
Andorra	AND	2015	0.000226	0	0.000226	4e-05	0	4e-05
Andorra	AND	2016	0.000244	0	0.000244	1.8e-05	0	1.8e-05
Andorra	AND	2017	0.000489	0	0.000489	0.000245	0	0.000245
Andorra	AND	2018	0.00109	0	0.00109	0.000601	0	0.000601
Andorra	AND	2019	0.001989	0	0.001989	0.000899	0	0.000899
Andorra	AND	2020	0.003084	0	0.003084	0.001095	0	0.001095
Andorra	AND	2021	0.004352	0	0.004352	0.001268	0	0.001268
Andorra	AND	2022	0.00563	0	0.00563	0.001278	0	0.001278
Andorra	AND	2023	0.008727	0	0.008727	0.003097	0	0.003097
Andorra	AND	2024	0.008727	0	0.008727	0	0	0
Angola	AGO	2013	2.1e-05	0	2.1e-05
Angola	AGO	2014	0.00032	0	0.00032	0.000299	0	0.000299
Angola	AGO	2015	0.00032	0	0.00032	0	0	0
Angola	AGO	2016	0.000328	0	0.000328	8e-06	0	8e-06
Angola	AGO	2017	0.000424	0	0.000424	9.6e-05	0	9.6e-05
Angola	AGO	2018	0.000437	0	0.000437	1.3e-05	0	1.3e-05
Angola	AGO	2019	0.001366	0	0.001366	0.000929	0	0.000929
Angola	AGO	2020	0.001374	0	0.001374	8e-06	0	8e-06
Angola	AGO	2021	0.001441	0	0.001441	6.7e-05	0	6.7e-05
Angola	AGO	2022	0.28546	0	0.28546	0.284019	0	0.284019
Angola	AGO	2023	0.31046	0	0.31046	0.025	0	0.025
Angola	AGO	2024	0.36189	0	0.36189	0.05143	0	0.05143
Anguilla	AIA	2012	6.2e-05	0	6.2e-05
Anguilla	AIA	2013	6.2e-05	0	6.2e-05	0	0	0
Anguilla	AIA	2014	0.001172	0	0.001172	0.00111	0	0.00111
Anguilla	AIA	2015	0.001172	0	0.001172	0	0	0
Anguilla	AIA	2016	0.002272	0	0.002272	0.0011	0	0.0011
Anguilla	AIA	2017	0.002272	0	0.002272	0	0	0
Anguilla	AIA	2018	0.001172	0	0.001172	-0.0011	0	-0.0011
Anguilla	AIA	2019	0.001542	0	0.001542	0.00037	0	0.00037
Anguilla	AIA	2020	0.001542	0	0.001542	0	0	0
Anguilla	AIA	2021	0.001542	0	0.001542	0	0	0
Anguilla	AIA	2022	0.001542	0	0.001542	0	0	0
Anguilla	AIA	2023	0.001542	0	0.001542	0	0	0
Anguilla	AIA	2024	0.001542	0	0.001542	0	0	0
Antigua and Barbuda	ATG	2009	0.0001	0	0.0001
Antigua and Barbuda	ATG	2010	0.0001	0	0.0001	0	0	0
Antigua and Barbuda	ATG	2011	0.0003	0	0.0003	0.0002	0	0.0002
Antigua and Barbuda	ATG	2012	0.0003	0	0.0003	0	0	0
Antigua and Barbuda	ATG	2013	0.0004	0	0.0004	0.0001	0	0.0001
Antigua and Barbuda	ATG	2014	0.0004	0	0.0004	0	0	0
Antigua and Barbuda	ATG	2015	0.0034	0	0.0034	0.003	0	0.003
Antigua and Barbuda	ATG	2016	0.00351	0	0.00351	0.00011	0	0.00011
Antigua and Barbuda	ATG	2017	0.004314	0	0.004314	0.000804	0	0.000804
Antigua and Barbuda	ATG	2018	0.008714	0	0.008714	0.0044	0	0.0044
Antigua and Barbuda	ATG	2019	0.008714	0	0.008714	0	0	0
Antigua and Barbuda	ATG	2020	0.012864	0	0.012864	0.00415	0	0.00415
Antigua and Barbuda	ATG	2021	0.014864	0	0.014864	0.002	0	0.002
Antigua and Barbuda	ATG	2022	0.014864	0	0.014864	0	0	0
Antigua and Barbuda	ATG	2023	0.015584	0	0.015584	0.000719999	0	0.000719999
Antigua and Barbuda	ATG	2024	0.015584	0	0.015584	0	0	0
Argentina	ARG	2000	0.000133	0.006543	0.006676
Argentina	ARG	2001	0.000234	6.9e-05	0.000303	0.000101	-0.006474	-0.006373
Argentina	ARG	2002	0.000234	0.002769	0.003003	0	0.0027	0.0027
Argentina	ARG	2003	0.000255	6.9e-05	0.000324	2.1e-05	-0.0027	-0.002679
Argentina	ARG	2004	0.00027	6.9e-05	0.000339	1.5e-05	0	1.5e-05
Argentina	ARG	2005	0.000193	6.9e-05	0.000262	-7.7e-05	0	-7.7e-05
Argentina	ARG	2006	0.000116	6.9e-05	0.000185	-7.7e-05	0	-7.7e-05
Argentina	ARG	2007	0.000127	6.9e-05	0.000196	1.1e-05	0	1.1e-05
Argentina	ARG	2008	0.000147	7.1e-05	0.000218	2e-05	2e-06	2.2e-05
Argentina	ARG	2009	0.002727	0.00088	0.003607	0.00258	0.000809	0.003389
Argentina	ARG	2010	0.00441	0.001134	0.005544	0.001683	0.000254	0.001937
Argentina	ARG	2011	0.00607	0.007433	0.013503	0.00166	0.006299	0.007959
Argentina	ARG	2012	0.01146	0.110033	0.121493	0.00539	0.1026	0.10799
Argentina	ARG	2013	0.013756	0.163032	0.176788	0.002296	0.052999	0.055295
Argentina	ARG	2014	0.013723	0.18824	0.201963	-3.3e-05	0.025208	0.025175
Argentina	ARG	2015	0.014203	0.18824	0.202443	0.000479999	0	0.000479999
Argentina	ARG	2016	0.013738	0.18824	0.201978	-0.000464999	0	-0.000464999
Argentina	ARG	2017	0.01359	0.227555	0.241145	-0.000147999	0.039315	0.039167
Argentina	ARG	2018	0.196106	0.751155	0.947261	0.182516	0.5236	0.706116
Argentina	ARG	2019	0.445852	1.60946	2.05531	0.249746	0.8583	1.10805
Argentina	ARG	2020	0.767872	2.624	3.39187	0.32202	1.01454	1.33656
Argentina	ARG	2021	1.07692	3.29222	4.36914	0.309046	0.66822	0.977266
Argentina	ARG	2022	1.11267	3.31022	4.42289	0.0357498	0.0180001	0.0537499
Argentina	ARG	2023	1.4053	3.70632	5.11162	0.292635	0.3961	0.688735
Argentina	ARG	2024	1.7406	4.32032	6.06092	0.335297	0.614	0.949297
Armenia	ARM	2005	0	0.00264	0.00264
Armenia	ARM	2006	0	0.00264	0.00264	0	0	0
Armenia	ARM	2007	0	0.00264	0.00264	0	0	0
Armenia	ARM	2008	0	0.00264	0.00264	0	0	0
Armenia	ARM	2009	0	0.00264	0.00264	0	0	0
Armenia	ARM	2010	0	0.00264	0.00264	0	0	0
Armenia	ARM	2011	0	0.00264	0.00264	0	0	0
Armenia	ARM	2012	0	0.00264	0.00264	0	0	0
Armenia	ARM	2013	0	0.00264	0.00264	0	0	0
Armenia	ARM	2014	0	0.00264	0.00264	0	0	0
Armenia	ARM	2015	0	0.0026	0.0026	0	-4e-05	-4e-05
Armenia	ARM	2016	0.001	0.002925	0.003925	0.001	0.000325	0.001325
Armenia	ARM	2017	0.0024	0.002925	0.005325	0.0014	0	0.0014
Armenia	ARM	2018	0.01732	0.002925	0.020245	0.01492	0	0.01492
Armenia	ARM	2019	0.0211	0.002925	0.024025	0.00378	0	0.00378
Armenia	ARM	2020	0.0505	0.002925	0.053425	0.0294	0	0.0294
Armenia	ARM	2021	0.1461	0.002925	0.149025	0.0956	0	0.0956
Armenia	ARM	2022	0.235195	0.002925	0.23812	0.089095	0	0.089095
Armenia	ARM	2023	0.4017	0.0029	0.4046	0.166505	-2.49998e-05	0.16648
Armenia	ARM	2024	0.4854	0.0029	0.4883	0.0837	0	0.0837
Aruba	ABW	2009	0	0.03	0.03
Aruba	ABW	2010	0.0001	0.03	0.0301	0.0001	0	0.0001
Aruba	ABW	2011	0.0003	0.03	0.0303	0.0002	0	0.0002
Aruba	ABW	2012	0.001	0.03	0.031	0.0007	0	0.0007
Aruba	ABW	2013	0.0016	0.03	0.0316	0.0006	0	0.0006
Aruba	ABW	2014	0.004911	0.03	0.034911	0.003311	0	0.003311
Aruba	ABW	2015	0.006111	0.03	0.036111	0.0012	0	0.0012
Aruba	ABW	2016	0.007262	0.03	0.037262	0.001151	0	0.001151
Aruba	ABW	2017	0.007315	0.03	0.037315	5.3e-05	0	5.3e-05
Aruba	ABW	2018	0.014815	0.03	0.044815	0.0075	0	0.0075
Aruba	ABW	2019	0.014815	0.03	0.044815	0	0	0
Aruba	ABW	2020	0.014815	0.03	0.044815	0	0	0
Aruba	ABW	2021	0.014815	0.03	0.044815	0	0	0
Aruba	ABW	2022	0.014804	0.03	0.044804	-1.1e-05	0	-1.1e-05
Aruba	ABW	2023	0.014804	0.03	0.044804	0	0	0
Aruba	ABW	2024	0.014804	0.03	0.044804	0	0	0
Australia	AUS	2000	0.025	0.033	0.058
Australia	AUS	2001	0.029	0.076	0.105	0.004	0.043	0.047
Australia	AUS	2002	0.034	0.106	0.14	0.005	0.03	0.035
Australia	AUS	2003	0.0394	0.19	0.2294	0.0054	0.084	0.0894
Australia	AUS	2004	0.0464	0.379	0.4254	0.007	0.189	0.196
Australia	AUS	2005	0.0524	0.74	0.7924	0.006	0.361	0.367
Australia	AUS	2006	0.0614	0.819	0.8804	0.009	0.079	0.088
Australia	AUS	2007	0.073	1.249	1.322	0.0116	0.43	0.4416
Australia	AUS	2008	0.085	1.441	1.526	0.012	0.192	0.204
Australia	AUS	2009	0.332	1.703	2.035	0.247	0.262	0.509
Australia	AUS	2010	1.091	1.864	2.955	0.759	0.161	0.92
Australia	AUS	2011	1.421	2.127	3.548	0.33	0.263	0.593
Australia	AUS	2012	2.511	2.561	5.072	1.09	0.434	1.524
Australia	AUS	2013	3.312	3.221	6.533	0.801	0.66	1.461
Australia	AUS	2014	4.137	3.797	7.934	0.825	0.576	1.401
Australia	AUS	2015	5.036	4.318	9.354	0.899	0.521	1.42
Australia	AUS	2016	5.881	4.683	10.564	0.845	0.365	1.21
Australia	AUS	2017	7.24123	5.407	12.6482	1.36023	0.724	2.08423
Australia	AUS	2018	11.1278	6.409	17.5368	3.88655	1.002	4.88855
Australia	AUS	2019	15.4527	7.881	23.3337	4.32491	1.472	5.79691
Australia	AUS	2020	19.7726	10.207	29.9796	4.31994	2.326	6.64594
Australia	AUS	2021	24.3966	10.555	34.9516	4.62399	0.348	4.97199
Australia	AUS	2022	28.8871	11.966	40.8531	4.49047	1.411	5.90147
Australia	AUS	2023	30.6749	12.908	43.5829	1.78785	0.942	2.72985
Australia	AUS	2024	35.8649	15.288	51.1529	5.19	2.38	7.57
Austria	AUT	2000	0.005	0.05	0.055
Austria	AUT	2001	0.007	0.067	0.074	0.002	0.017	0.019
Austria	AUT	2002	0.009	0.109	0.118	0.002	0.042	0.044
Austria	AUT	2003	0.023	0.322	0.345	0.014	0.213	0.227
Austria	AUT	2004	0.027	0.581	0.608	0.004	0.259	0.263
Austria	AUT	2005	0.023518	0.825219	0.848737	-0.003482	0.244219	0.240737
Austria	AUT	2006	0.025125	0.968269	0.993394	0.001607	0.14305	0.144657
Austria	AUT	2007	0.027021	0.991159	1.01818	0.001896	0.02289	0.024786
Austria	AUT	2008	0.033193	0.991974	1.02517	0.006172	0.000815	0.006987
Austria	AUT	2009	0.05219	1.00099	1.05318	0.018997	0.009011	0.028008
Austria	AUT	2010	0.092216	1.01583	1.10804	0.040026	0.014843	0.054869
Austria	AUT	2011	0.177979	1.10597	1.28394	0.085763	0.090138	0.175901
Austria	AUT	2012	0.341334	1.33715	1.67848	0.163355	0.231184	0.394539
Austria	AUT	2013	0.630164	1.67454	2.3047	0.28883	0.337388	0.626218
Austria	AUT	2014	0.789734	2.11027	2.90001	0.15957	0.435737	0.595307
Austria	AUT	2015	0.939633	2.48873	3.42836	0.149899	0.378451	0.52835
Austria	AUT	2016	1.0995	2.73	3.8295	0.159871	0.24127	0.401141
Austria	AUT	2017	1.27193	2.8867	4.15863	0.17243	0.156702	0.329132
Austria	AUT	2018	1.45733	3.13271	4.59004	0.185394	0.246015	0.431409
Austria	AUT	2019	1.70279	3.22412	4.92691	0.245462	0.0914042	0.336866
Austria	AUT	2020	2.03713	3.22598	5.26311	0.334341	0.001862	0.336203
Austria	AUT	2021	2.7713	3.42233	6.19364	0.734171	0.196356	0.930527
Austria	AUT	2022	3.7574	3.6331	7.39051	0.986102	0.210768	1.19687
Austria	AUT	2023	6.33099	3.89629	10.2273	2.57359	0.263191	2.83678
Austria	AUT	2024	8.48099	4.035	12.516	2.15	0.138706	2.28871
Azerbaijan	AZE	2007	0.0001	0	0.0001
Azerbaijan	AZE	2008	0.0001	0	0.0001	0	0	0
Azerbaijan	AZE	2009	0.0001	0.002	0.0021	0	0.002	0.002
Azerbaijan	AZE	2010	0.0003	0.002	0.0023	0.0002	0	0.0002
Azerbaijan	AZE	2011	0.001	0.002	0.003	0.0007	0	0.0007
Azerbaijan	AZE	2012	0.001	0.002	0.003	0	0	0
Azerbaijan	AZE	2013	0.001	0.0027	0.0037	0	0.0007	0.0007
Azerbaijan	AZE	2014	0.0024	0.0027	0.0051	0.0014	0	0.0014
Azerbaijan	AZE	2015	0.0048	0.008	0.0128	0.0024	0.0053	0.0077
Azerbaijan	AZE	2016	0.0249	0.0157	0.0406	0.0201	0.0077	0.0278
Azerbaijan	AZE	2017	0.0284	0.0157	0.0441	0.0035	0	0.0035
Azerbaijan	AZE	2018	0.0349	0.066	0.1009	0.0065	0.0503	0.0568
Azerbaijan	AZE	2019	0.0331	0.066	0.0991	-0.0018	0	-0.0018
Azerbaijan	AZE	2020	0.0351	0.066	0.1011	0.002	0	0.002
Azerbaijan	AZE	2021	0.0479	0.066	0.1139	0.0128	0	0.0128
Azerbaijan	AZE	2022	0.0512	0.064	0.1152	0.0033	-0.002	0.0013
Azerbaijan	AZE	2023	0.2818	0.0665	0.3483	0.2306	0.0025	0.2331
Azerbaijan	AZE	2024	0.281	0.06662	0.34762	-0.0008	0.00012	-0.00068
Bahamas	BHS	2007	0.0001	0	0.0001
Bahamas	BHS	2008	0.0001	0	0.0001	0	0	0
Bahamas	BHS	2009	0.0002	0	0.0002	0.0001	0	0.0001
Bahamas	BHS	2010	0.0003	0	0.0003	0.0001	0	0.0001
Bahamas	BHS	2011	0.000651	0.0003	0.000951	0.000351	0.0003	0.000651
Bahamas	BHS	2012	0.00086	0.0003	0.00116	0.000209	0	0.000209
Bahamas	BHS	2013	0.001414	0.0003	0.001714	0.000554	0	0.000554
Bahamas	BHS	2014	0.002065	0.0003	0.002365	0.000651	0	0.000651
Bahamas	BHS	2015	0.002776	0.0003	0.003076	0.000711	0	0.000711
Bahamas	BHS	2016	0.002872	0.0003	0.003172	9.6e-05	0	9.6e-05
Bahamas	BHS	2017	0.002813	0.0003	0.003113	-5.9e-05	0	-5.9e-05
Bahamas	BHS	2018	0.002927	0.0003	0.003227	0.000114	0	0.000114
Bahamas	BHS	2019	0.004669	0.0003	0.004969	0.001742	0	0.001742
Bahamas	BHS	2020	0.005112	0.0003	0.005412	0.000443	0	0.000443
Bahamas	BHS	2021	0.010212	0.0003	0.010512	0.0051	0	0.0051
Bahamas	BHS	2022	0.015264	0.0003	0.015564	0.005052	0	0.005052
Bahamas	BHS	2023	0.015335	0.0003	0.015635	7.1e-05	0	7.1e-05
Bahamas	BHS	2024	0.021335	0.0003	0.021635	0.006	0	0.006
Bahrain	BHR	2008	0	0.000675	0.000675
Bahrain	BHR	2009	0	0.000675	0.000675	0	0	0
Bahrain	BHR	2010	0	0.000675	0.000675	0	0	0
Bahrain	BHR	2011	0	0.000675	0.000675	0	0	0
Bahrain	BHR	2012	0	0.000675	0.000675	0	0	0
Bahrain	BHR	2013	0	0.000675	0.000675	0	0	0
Bahrain	BHR	2014	0.005	0.000675	0.005675	0.005	0	0.005
Bahrain	BHR	2015	0.005	0.000675	0.005675	0	0	0
Bahrain	BHR	2016	0.006	0.000675	0.006675	0.001	0	0.001
Bahrain	BHR	2017	0.006	0.000675	0.006675	0	0	0
Bahrain	BHR	2018	0.00631	0.000675	0.006985	0.00031	0	0.00031
Bahrain	BHR	2019	0.009704	0.000675	0.010379	0.003394	0	0.003394
Bahrain	BHR	2020	0.010101	0.000675	0.010776	0.000397	0	0.000397
Bahrain	BHR	2021	0.021335	0.000675	0.02201	0.011234	0	0.011234
Bahrain	BHR	2022	0.045592	0.002675	0.048267	0.024257	0.002	0.026257
Bahrain	BHR	2023	0.056623	0.002675	0.059298	0.011031	0	0.011031
Bahrain	BHR	2024	0.066028	0.002675	0.068703	0.009405	0	0.009405
Bangladesh	BGD	2003	0.000621	0	0.000621
Bangladesh	BGD	2004	0.001397	0	0.001397	0.000776	0	0.000776
Bangladesh	BGD	2005	0.002483	0	0.002483	0.001086	0	0.001086
Bangladesh	BGD	2006	0.003966	0.0009	0.004866	0.001483	0.0009	0.002383
Bangladesh	BGD	2007	0.006604	0.0009	0.007504	0.002638	0	0.002638
Bangladesh	BGD	2008	0.011105	0.0019	0.013005	0.004501	0.001	0.005501
Bangladesh	BGD	2009	0.018324	0.0019	0.020224	0.007219	0	0.007219
Bangladesh	BGD	2010	0.032339	0.0019	0.034239	0.014015	0	0.014015
Bangladesh	BGD	2011	0.090247	0.0019	0.092147	0.057908	0	0.057908
Bangladesh	BGD	2012	0.113879	0.0019	0.115779	0.023632	0	0.023632
Bangladesh	BGD	2013	0.141822	0.0019	0.143722	0.027943	0	0.027943
Bangladesh	BGD	2014	0.169237	0.0019	0.171137	0.027415	0	0.027415
Bangladesh	BGD	2015	0.196129	0.0029	0.199029	0.026892	0.001	0.027892
Bangladesh	BGD	2016	0.165412	0.0029	0.168312	-0.030717	0	-0.030717
Bangladesh	BGD	2017	0.216654	0.0029	0.219554	0.051242	0	0.051242
Bangladesh	BGD	2018	0.240359	0.0029	0.243259	0.023705	0	0.023705
Bangladesh	BGD	2019	0.279614	0.0029	0.282514	0.039255	0	0.039255
Bangladesh	BGD	2020	0.343267	0.0029	0.346167	0.063653	0	0.063653
Bangladesh	BGD	2021	0.505717	0.0029	0.508617	0.16245	0	0.16245
Bangladesh	BGD	2022	0.522855	0.0029	0.525755	0.017138	0	0.017138
Bangladesh	BGD	2023	0.745905	0.0029	0.748805	0.22305	0	0.22305
Bangladesh	BGD	2024	0.846048	0.0629	0.908948	0.100143	0.06	0.160143
Barbados	BRB	2000	0	4e-05	4e-05
Barbados	BRB	2001	0.0001	4e-05	0.00014	0.0001	0	0.0001
Barbados	BRB	2002	0.0001	4e-05	0.00014	0	0	0
Barbados	BRB	2003	0.0001	4e-05	0.00014	0	0	0
Barbados	BRB	2004	0.0001	4e-05	0.00014	0	0	0
Barbados	BRB	2005	0.0002	4e-05	0.00024	0.0001	0	0.0001
Barbados	BRB	2006	0.0002	4e-05	0.00024	0	0	0
Barbados	BRB	2007	0.0006	4e-05	0.00064	0.0004	0	0.0004
Barbados	BRB	2008	0.0006	4e-05	0.00064	0	0	0
Barbados	BRB	2009	0.0008	4e-05	0.00084	0.0002	0	0.0002
Barbados	BRB	2010	0.001	4e-05	0.00104	0.0002	0	0.0002
Barbados	BRB	2011	0.00125	4e-05	0.00129	0.00025	0	0.00025
Barbados	BRB	2012	0.0015	4e-05	0.00154	0.00025	0	0.00025
Barbados	BRB	2013	0.000426	4e-05	0.000466	-0.001074	0	-0.001074
Barbados	BRB	2014	0.001294	4e-05	0.001334	0.000868	0	0.000868
Barbados	BRB	2015	0.003094	4e-05	0.003134	0.0018	0	0.0018
Barbados	BRB	2016	0.014937	6e-05	0.014997	0.011843	2e-05	0.011863
Barbados	BRB	2017	0.016397	6e-05	0.016457	0.00146	0	0.00146
Barbados	BRB	2018	0.017246	6e-05	0.017306	0.000849	0	0.000849
Barbados	BRB	2019	0.03321	6e-05	0.03327	0.015964	0	0.015964
Barbados	BRB	2020	0.049154	6e-05	0.049214	0.015944	0	0.015944
Barbados	BRB	2021	0.063926	6e-05	0.063986	0.014772	0	0.014772
Barbados	BRB	2022	0.069342	0.00116	0.070502	0.005416	0.0011	0.006516
Barbados	BRB	2023	0.269353	0.00116	0.270513	0.200011	0	0.200011
Barbados	BRB	2024	0.069353	0.00116	0.070513	-0.2	0	-0.2
Belarus	BLR	2000	0	0.00025	0.00025
Belarus	BLR	2001	0	0.0006	0.0006	0	0.00035	0.00035
Belarus	BLR	2002	0	0.0011	0.0011	0	0.0005	0.0005
Belarus	BLR	2003	0	0.0011	0.0011	0	0	0
Belarus	BLR	2004	0	0.0011	0.0011	0	0	0
Belarus	BLR	2005	0	0.0011	0.0011	0	0	0
Belarus	BLR	2006	0	0.0011	0.0011	0	0	0
Belarus	BLR	2007	0	0.0019	0.0019	0	0.0008	0.0008
Belarus	BLR	2008	0	0.0019	0.0019	0	0	0
Belarus	BLR	2009	0	0.0019	0.0019	0	0	0
Belarus	BLR	2010	0	0.0019	0.0019	0	0	0
Belarus	BLR	2011	0	0.002	0.002	0	0.0001	0.0001
Belarus	BLR	2012	0	0.005	0.005	0	0.003	0.003
Belarus	BLR	2013	0	0.007	0.007	0	0.002	0.002
Belarus	BLR	2014	0.004	0.009	0.013	0.004	0.002	0.006
Belarus	BLR	2015	0.006	0.022	0.028	0.002	0.013	0.015
Belarus	BLR	2016	0.047	0.062	0.109	0.041	0.04	0.081
Belarus	BLR	2017	0.08	0.084	0.164	0.033	0.022	0.055
Belarus	BLR	2018	0.154	0.092	0.246	0.074	0.008	0.082
Belarus	BLR	2019	0.154	0.112	0.266	0	0.02	0.02
Belarus	BLR	2020	0.1603	0.112	0.2723	0.0063	0	0.0063
Belarus	BLR	2021	0.1637	0.1117	0.2754	0.0034	-0.0003	0.0031
Belarus	BLR	2022	0.2725	0.12	0.3925	0.1088	0.0083	0.1171
Belarus	BLR	2023	0.2727	0.122	0.3947	0.0002	0.002	0.0022
Belarus	BLR	2024	0.265	0.122	0.387	-0.0077	0	-0.0077
Belgium	BEL	2000	0	0.014	0.014
Belgium	BEL	2001	0	0.026	0.026	0	0.012	0.012
Belgium	BEL	2002	0.001	0.031	0.032	0.001	0.005	0.006
Belgium	BEL	2003	0.001	0.067	0.068	0	0.036	0.036
Belgium	BEL	2004	0.001	0.096	0.097	0	0.029	0.029
Belgium	BEL	2005	0.002	0.167	0.169	0.001	0.071	0.072
Belgium	BEL	2006	0.002	0.212	0.214	0	0.045	0.045
Belgium	BEL	2007	0.02	0.276	0.296	0.018	0.064	0.082
Belgium	BEL	2008	0.062	0.324	0.386	0.042	0.048	0.09
Belgium	BEL	2009	0.386	0.608	0.994	0.324	0.284	0.608
Belgium	BEL	2010	0.8402	0.9034	1.7436	0.4542	0.2954	0.7496
Belgium	BEL	2011	1.8649	1.0665	2.9314	1.0247	0.1631	1.1878
Belgium	BEL	2012	2.5955	1.3669	3.9624	0.7306	0.3004	1.031
Belgium	BEL	2013	2.864	1.769	4.633	0.2685	0.4021	0.6706
Belgium	BEL	2014	2.9771	1.9327	4.9098	0.1131	0.1637	0.2768
Belgium	BEL	2015	3.1081	2.1813	5.2894	0.131	0.2486	0.3796
Belgium	BEL	2016	3.2912	2.3337	5.6249	0.1831	0.1524	0.3355
Belgium	BEL	2017	3.6004	2.7794	6.3798	0.3092	0.4457	0.7549
Belgium	BEL	2018	3.9628	3.3049	7.2677	0.3624	0.5255	0.8879
Belgium	BEL	2019	4.523	3.8637	8.3867	0.5602	0.5588	1.119
Belgium	BEL	2020	5.453	4.6728	10.1258	0.93	0.8091	1.7391
Belgium	BEL	2021	5.934	4.9484	10.8824	0.481	0.275601	0.756601
Belgium	BEL	2022	6.7812	5.3034	12.0846	0.8472	0.355	1.2022
Belgium	BEL	2023	8.3519	5.4541	13.806	1.5707	0.150699	1.7214
Belgium	BEL	2024	9.7519	5.59876	15.3507	1.4	0.14466	1.54466
Belize	BLZ	2000	1.1e-05	2e-05	3.1e-05
Belize	BLZ	2001	1.1e-05	2e-05	3.1e-05	0	0	0
Belize	BLZ	2002	1.1e-05	2e-05	3.1e-05	0	0	0
Belize	BLZ	2003	1.1e-05	2e-05	3.1e-05	0	0	0
Belize	BLZ	2004	1.1e-05	2e-05	3.1e-05	0	0	0
Belize	BLZ	2005	1.1e-05	2e-05	3.1e-05	0	0	0
Belize	BLZ	2006	1.1e-05	2e-05	3.1e-05	0	0	0
Belize	BLZ	2007	1.1e-05	2e-05	3.1e-05	0	0	0
Belize	BLZ	2008	1.1e-05	2e-05	3.1e-05	0	0	0
Belize	BLZ	2009	1.1e-05	2e-05	3.1e-05	0	0	0
Belize	BLZ	2010	1.1e-05	2e-05	3.1e-05	0	0	0
Belize	BLZ	2011	1.1e-05	2e-05	3.1e-05	0	0	0
Belize	BLZ	2012	0.000498	2e-05	0.000518	0.000487	0	0.000487
Belize	BLZ	2013	0.000684	2e-05	0.000704	0.000186	0	0.000186
Belize	BLZ	2014	0.000691	2e-05	0.000711	6.99996e-06	0	6.99996e-06
Belize	BLZ	2015	0.0007	2e-05	0.00072	9.00004e-06	0	9.00004e-06
Belize	BLZ	2016	0.0007	2e-05	0.00072	0	0	0
Belize	BLZ	2017	0.000737	2e-05	0.000757	3.7e-05	0	3.7e-05
Belize	BLZ	2018	0.001091	2e-05	0.001111	0.000354	0	0.000354
Belize	BLZ	2019	0.006839	2e-05	0.006859	0.005748	0	0.005748
Belize	BLZ	2020	0.006902	2e-05	0.006922	6.30003e-05	0	6.30003e-05
Belize	BLZ	2021	0.006902	2e-05	0.006922	0	0	0
Belize	BLZ	2022	0.006912	2e-05	0.006932	1e-05	0	1e-05
Belize	BLZ	2023	0.006959	2e-05	0.006979	4.7e-05	0	4.7e-05
Belize	BLZ	2024	0.006959	2e-05	0.006979	0	0	0
Benin	BEN	2014	0.00025	0	0.00025
Benin	BEN	2015	0.001436	0	0.001436	0.001186	0	0.001186
Benin	BEN	2016	0.002195	0	0.002195	0.000759	0	0.000759
Benin	BEN	2017	0.002436	0	0.002436	0.000241	0	0.000241
Benin	BEN	2018	0.002585	0	0.002585	0.000149	0	0.000149
Benin	BEN	2019	0.003806	0	0.003806	0.001221	0	0.001221
Benin	BEN	2020	0.004847	0	0.004847	0.001041	0	0.001041
Benin	BEN	2021	0.006016	0	0.006016	0.001169	0	0.001169
Benin	BEN	2022	0.033382	0	0.033382	0.027366	0	0.027366
Benin	BEN	2023	0.035258	0	0.035258	0.001876	0	0.001876
Benin	BEN	2024	0.035258	0	0.035258	0	0	0
Bhutan	BTN	2005	1.2e-05	0	1.2e-05
Bhutan	BTN	2006	2.4e-05	0	2.4e-05	1.2e-05	0	1.2e-05
Bhutan	BTN	2007	3.6e-05	0	3.6e-05	1.2e-05	0	1.2e-05
Bhutan	BTN	2008	4.8e-05	0	4.8e-05	1.2e-05	0	1.2e-05
Bhutan	BTN	2009	6e-05	0	6e-05	1.2e-05	0	1.2e-05
Bhutan	BTN	2010	7.2e-05	0	7.2e-05	1.2e-05	0	1.2e-05
Bhutan	BTN	2011	0.000107	0	0.000107	3.5e-05	0	3.5e-05
Bhutan	BTN	2012	0.000119	0	0.000119	1.2e-05	0	1.2e-05
Bhutan	BTN	2013	0.000131	0	0.000131	1.2e-05	0	1.2e-05
Bhutan	BTN	2014	0.00012	0	0.00012	-1.1e-05	0	-1.1e-05
Bhutan	BTN	2015	0.00012	0.0006	0.00072	0	0.0006	0.0006
Bhutan	BTN	2016	0.00012	0.0006	0.00072	0	0	0
Bhutan	BTN	2017	0.00012	0.0006	0.00072	0	0	0
Bhutan	BTN	2018	0.00012	0.0006	0.00072	0	0	0
Bhutan	BTN	2019	0.00012	0.0006	0.00072	0	0	0
Bhutan	BTN	2020	0.00012	0.0006	0.00072	0	0	0
Bhutan	BTN	2021	0.000392	0.0006	0.000992	0.000272	0	0.000272
Bhutan	BTN	2022	0.000392	0.0006	0.000992	0	0	0
Bhutan	BTN	2023	0.00127	0.0006	0.00187	0.000878	0	0.000878
Bhutan	BTN	2024	0.00337	0.0006	0.00397	0.0021	0	0.0021
Bolivia	BOL	2010	1e-06	0	1e-06
Bolivia	BOL	2011	6.8e-05	0	6.8e-05	6.7e-05	0	6.7e-05
Bolivia	BOL	2012	6.9e-05	0	6.9e-05	1e-06	0	1e-06
Bolivia	BOL	2013	0.000424	0	0.000424	0.000355	0	0.000355
Bolivia	BOL	2014	0.000429	0.003	0.003429	4.99998e-06	0.003	0.003005
Bolivia	BOL	2015	0.005617	0.003	0.008617	0.005188	0	0.005188
Bolivia	BOL	2016	0.005627	0.027	0.032627	1e-05	0.024	0.02401
Bolivia	BOL	2017	0.010699	0.027	0.037699	0.005072	0	0.005072
Bolivia	BOL	2018	0.070497	0.027	0.097497	0.059798	0	0.059798
Bolivia	BOL	2019	0.071003	0.027	0.098003	0.000506	0	0.000506
Bolivia	BOL	2020	0.121322	0.027	0.148322	0.050319	0	0.050319
Bolivia	BOL	2021	0.171154	0.1278	0.298954	0.049832	0.1008	0.150632
Bolivia	BOL	2022	0.171827	0.1278	0.299627	0.00067299	0	0.00067299
Bolivia	BOL	2023	0.173315	0.135	0.308315	0.00148801	0.0072	0.00868801
Bolivia	BOL	2024	0.17707	0.135	0.31207	0.003755	0	0.003755
Bonaire Sint Eustatius and Saba	BES	2007	0	0.00033	0.00033
Bonaire Sint Eustatius and Saba	BES	2008	0	0.00033	0.00033	0	0	0
Bonaire Sint Eustatius and Saba	BES	2009	0	0.01023	0.01023	0	0.0099	0.0099
Bonaire Sint Eustatius and Saba	BES	2010	0	0.01023	0.01023	0	0	0
Bonaire Sint Eustatius and Saba	BES	2011	0	0.01023	0.01023	0	0	0
Bonaire Sint Eustatius and Saba	BES	2012	0	0.01023	0.01023	0	0	0
Bonaire Sint Eustatius and Saba	BES	2013	0	0.01113	0.01113	0	0.000900001	0.000900001
Bonaire Sint Eustatius and Saba	BES	2014	0	0.01113	0.01113	0	0	0
Bonaire Sint Eustatius and Saba	BES	2015	0.0003	0.01113	0.01143	0.0003	0	0.0003
Bonaire Sint Eustatius and Saba	BES	2016	0.002245	0.01113	0.013375	0.001945	0	0.001945
Bonaire Sint Eustatius and Saba	BES	2017	0.004505	0.01113	0.015635	0.00226	0	0.00226
Bonaire Sint Eustatius and Saba	BES	2018	0.005645	0.01113	0.016775	0.00114	0	0.00114
Bonaire Sint Eustatius and Saba	BES	2019	0.006645	0.01113	0.017775	0.001	0	0.001
Bonaire Sint Eustatius and Saba	BES	2020	0.006645	0.01113	0.017775	0	0	0
Bonaire Sint Eustatius and Saba	BES	2021	0.006645	0.01113	0.017775	0	0	0
Bonaire Sint Eustatius and Saba	BES	2022	0.006645	0.01113	0.017775	0	0	0
Bonaire Sint Eustatius and Saba	BES	2023	0.007775	0.01113	0.018905	0.00113	0	0.00113
Bonaire Sint Eustatius and Saba	BES	2024	0.013075	0.01113	0.024205	0.0053	0	0.0053
Bosnia and Herzegovina	BIH	2003	0.0001	0	0.0001
Bosnia and Herzegovina	BIH	2004	0.0002	0	0.0002	0.0001	0	0.0001
Bosnia and Herzegovina	BIH	2005	0.0003	0	0.0003	0.0001	0	0.0001
Bosnia and Herzegovina	BIH	2006	0.0003	0	0.0003	0	0	0
Bosnia and Herzegovina	BIH	2007	0.0003	0	0.0003	0	0	0
Bosnia and Herzegovina	BIH	2008	0.0003	0	0.0003	0	0	0
Bosnia and Herzegovina	BIH	2009	0.0003	0	0.0003	0	0	0
Bosnia and Herzegovina	BIH	2010	0.0003	0	0.0003	0	0	0
Bosnia and Herzegovina	BIH	2011	0.0003	0.0003	0.0006	0	0.0003	0.0003
Bosnia and Herzegovina	BIH	2012	0.000349	0.0003	0.000649	4.9e-05	0	4.9e-05
Bosnia and Herzegovina	BIH	2013	0.001339	0.0003	0.001639	0.00099	0	0.00099
Bosnia and Herzegovina	BIH	2014	0.007166	0.0003	0.007466	0.005827	0	0.005827
Bosnia and Herzegovina	BIH	2015	0.00817	0.0003	0.00847	0.001004	0	0.001004
Bosnia and Herzegovina	BIH	2016	0.01412	0.0003	0.01442	0.00595	0	0.00595
Bosnia and Herzegovina	BIH	2017	0.016	0.0003	0.0163	0.00188	0	0.00188
Bosnia and Herzegovina	BIH	2018	0.01815	0.051	0.06915	0.00215	0.0507	0.05285
Bosnia and Herzegovina	BIH	2019	0.02235	0.087	0.10935	0.0042	0.036	0.0402
Bosnia and Herzegovina	BIH	2020	0.03489	0.087	0.12189	0.01254	0	0.01254
Bosnia and Herzegovina	BIH	2021	0.05651	0.135	0.19151	0.02162	0.048	0.06962
Bosnia and Herzegovina	BIH	2022	0.10156	0.135	0.23656	0.04505	0	0.04505
Bosnia and Herzegovina	BIH	2023	0.21219	0.135	0.34719	0.11063	0	0.11063
Bosnia and Herzegovina	BIH	2024	0.21219	0.219	0.43119	0	0.084	0.084
Botswana	BWA	2009	2e-05	0	2e-05
Botswana	BWA	2010	0.000139	0	0.000139	0.000119	0	0.000119
Botswana	BWA	2011	0.000169	0	0.000169	3e-05	0	3e-05
Botswana	BWA	2012	0.001615	0	0.001615	0.001446	0	0.001446
Botswana	BWA	2013	0.001715	0	0.001715	9.99999e-05	0	9.99999e-05
Botswana	BWA	2014	0.00186	0	0.00186	0.000145	0	0.000145
Botswana	BWA	2015	0.002153	0	0.002153	0.000293	0	0.000293
Botswana	BWA	2016	0.00328	0	0.00328	0.001127	0	0.001127
Botswana	BWA	2017	0.003415	0	0.003415	0.000135	0	0.000135
Botswana	BWA	2018	0.00372	0	0.00372	0.000305	0	0.000305
Botswana	BWA	2019	0.005919	0	0.005919	0.002199	0	0.002199
Botswana	BWA	2020	0.005918	0	0.005918	-9.993e-07	0	-9.993e-07
Botswana	BWA	2021	0.006301	0	0.006301	0.000383	0	0.000383
Botswana	BWA	2022	0.006289	0	0.006289	-1.20002e-05	0	-1.20002e-05
Botswana	BWA	2023	0.0103	0	0.0103	0.004011	0	0.004011
Botswana	BWA	2024	0.0103	0	0.0103	0	0	0
Brazil	BRA	2000	0.001561	0.019206	0.020767
Brazil	BRA	2001	0.001596	0.019206	0.020802	3.49999e-05	0	3.49999e-05
Brazil	BRA	2002	0.001596	0.019806	0.021402	0	0.000600001	0.000600001
Brazil	BRA	2003	0.002276	0.019806	0.022082	0.00068	0	0.00068
Brazil	BRA	2004	0.002278	0.024606	0.026884	1.9999e-06	0.0048	0.004802
Brazil	BRA	2005	0.002278	0.024606	0.026884	0	0	0
Brazil	BRA	2006	0.002278	0.232906	0.235184	0	0.2083	0.2083
Brazil	BRA	2007	0.002278	0.243106	0.245384	0	0.0102	0.0102
Brazil	BRA	2008	0.002299	0.338928	0.341227	2.10001e-05	0.095822	0.095843
Brazil	BRA	2009	0.002523	0.603758	0.606281	0.000224	0.26483	0.265054
Brazil	BRA	2010	0.002574	0.930558	0.933132	5.09998e-05	0.3268	0.326851
Brazil	BRA	2011	0.008123	1.52691	1.53503	0.005549	0.59635	0.601899
Brazil	BRA	2012	0.009189	1.90069	1.90987	0.001066	0.373778	0.374844
Brazil	BRA	2013	0.015578	2.25126	2.26684	0.006389	0.350577	0.356966
Brazil	BRA	2014	0.024019	5.02954	5.05356	0.008441	2.77828	2.78672
Brazil	BRA	2015	0.049046	7.68237	7.73142	0.025027	2.65283	2.67786
Brazil	BRA	2016	0.135812	10.3223	10.4581	0.086766	2.63996	2.72673
Brazil	BRA	2017	1.21293	12.451	13.6639	1.07712	2.12868	3.2058
Brazil	BRA	2018	2.46766	14.514	16.9817	1.25472	2.06299	3.31772
Brazil	BRA	2019	4.70873	15.4566	20.1654	2.24108	0.942622	3.1837
Brazil	BRA	2020	8.48517	17.2166	25.7017	3.77644	1.75992	5.53636
Brazil	BRA	2021	14.5137	21.0024	35.5161	6.0285	3.78584	9.81433
Brazil	BRA	2022	25.3987	24.1957	49.5945	10.8851	3.19335	14.0784
Brazil	BRA	2023	37.9431	29.1129	67.056	12.5444	4.91714	17.4615
Brazil	BRA	2024	53.1158	32.9593	86.0751	15.1727	3.84643	19.0191
British Virgin Islands	VGB	2010	1.9e-05	0.0005	0.000519
British Virgin Islands	VGB	2011	1.9e-05	0.0005	0.000519	0	0	0
British Virgin Islands	VGB	2012	1.9e-05	0.0005	0.000519	0	0	0
British Virgin Islands	VGB	2013	2.2e-05	0.0005	0.000522	3e-06	0	3e-06
British Virgin Islands	VGB	2014	5.1e-05	0.0005	0.000551	2.9e-05	0	2.9e-05
British Virgin Islands	VGB	2015	0.000763	0.0005	0.001263	0.000712	0	0.000712
British Virgin Islands	VGB	2016	0.000925	0.0005	0.001425	0.000162	0	0.000162
British Virgin Islands	VGB	2017	0.000926	0.0005	0.001426	1e-06	0	1e-06
British Virgin Islands	VGB	2018	0.000935	0.0005	0.001435	9e-06	0	9e-06
British Virgin Islands	VGB	2019	0.00099	0.000801	0.001791	5.5e-05	0.000301	0.000356
British Virgin Islands	VGB	2020	0.001235	0.000801	0.002036	0.000245	0	0.000245
British Virgin Islands	VGB	2021	0.001486	0.000801	0.002287	0.000251	0	0.000251
British Virgin Islands	VGB	2022	0.001516	0.000801	0.002317	3e-05	0	3e-05
British Virgin Islands	VGB	2023	0.002526	0.000801	0.003327	0.00101	0	0.00101
British Virgin Islands	VGB	2024	0.002526	0.000801	0.003327	0	0	0
Brunei	BRN	2010	0.0012	0	0.0012
Brunei	BRN	2011	0.0012	0	0.0012	0	0	0
Brunei	BRN	2012	0.0012	0	0.0012	0	0	0
Brunei	BRN	2013	0.0012	0	0.0012	0	0	0
Brunei	BRN	2014	0.001214	0	0.001214	1.39999e-05	0	1.39999e-05
Brunei	BRN	2015	0.001215	0	0.001215	1e-06	0	1e-06
Brunei	BRN	2016	0.001215	0	0.001215	0	0	0
Brunei	BRN	2017	0.001216	0	0.001216	1.0001e-06	0	1.0001e-06
Brunei	BRN	2018	0.001224	0	0.001224	8e-06	0	8e-06
Brunei	BRN	2019	0.001226	0	0.001226	1.9999e-06	0	1.9999e-06
Brunei	BRN	2020	0.001461	0	0.001461	0.000235	0	0.000235
Brunei	BRN	2021	0.004881	0	0.004881	0.00342	0	0.00342
Brunei	BRN	2022	0.004909	0	0.004909	2.8e-05	0	2.8e-05
Brunei	BRN	2023	0.005054	0	0.005054	0.000145	0	0.000145
Brunei	BRN	2024	0.005199	0	0.005199	0.000145	0	0.000145
Bulgaria	BGR	2004	0	0.001	0.001
Bulgaria	BGR	2005	0	0.008	0.008	0	0.007	0.007
Bulgaria	BGR	2006	0	0.027	0.027	0	0.019	0.019
Bulgaria	BGR	2007	3e-05	0.03	0.03003	3e-05	0.003	0.00303
Bulgaria	BGR	2008	0.0001	0.114	0.1141	7e-05	0.084	0.08407
Bulgaria	BGR	2009	0.002	0.333	0.335	0.0019	0.219	0.2209
Bulgaria	BGR	2010	0.025	0.488	0.513	0.023	0.155	0.178
Bulgaria	BGR	2011	0.154	0.541	0.695	0.129	0.053	0.182
Bulgaria	BGR	2012	0.922	0.677	1.599	0.768	0.136	0.904
Bulgaria	BGR	2013	1.039	0.683	1.722	0.117	0.006	0.123
Bulgaria	BGR	2014	1.029	0.699	1.728	-0.01	0.016	0.006
Bulgaria	BGR	2015	1.028	0.699	1.727	-0.001	0	-0.001
Bulgaria	BGR	2016	1.03	0.699	1.729	0.002	0	0.002
Bulgaria	BGR	2017	1.0307	0.69839	1.72909	0.000701	-0.00061	9.1e-05
Bulgaria	BGR	2018	1.03306	0.69892	1.73198	0.0023569	0.00053	0.0028869
Bulgaria	BGR	2019	1.04439	0.70312	1.74751	0.0113321	0.0042	0.0155321
Bulgaria	BGR	2020	1.10021	0.7028	1.80301	0.055821	-0.00032	0.055501
Bulgaria	BGR	2021	1.27471	0.704375	1.97909	0.174502	0.001575	0.176077
Bulgaria	BGR	2022	1.73654	0.70431	2.44085	0.461824	-6.5e-05	0.461759
Bulgaria	BGR	2023	2.90813	0.70431	3.61244	1.17159	0	1.17159
Bulgaria	BGR	2024	3.90813	0.70431	4.61244	1	0	1
Burkina Faso	BFA	2004	0.00011	0	0.00011
Burkina Faso	BFA	2005	0.00011	0	0.00011	0	0	0
Burkina Faso	BFA	2006	0.00011	0	0.00011	0	0	0
Burkina Faso	BFA	2007	0.00011	0	0.00011	0	0	0
Burkina Faso	BFA	2008	0.00011	0	0.00011	0	0	0
Burkina Faso	BFA	2009	0.000112	0	0.000112	2e-06	0	2e-06
Burkina Faso	BFA	2010	0.000209	0	0.000209	9.7e-05	0	9.7e-05
Burkina Faso	BFA	2011	0.000267	0	0.000267	5.8e-05	0	5.8e-05
Burkina Faso	BFA	2012	0.000833	0	0.000833	0.000566	0	0.000566
Burkina Faso	BFA	2013	0.001341	0	0.001341	0.000508	0	0.000508
Burkina Faso	BFA	2014	0.001824	0	0.001824	0.000483	0	0.000483
Burkina Faso	BFA	2015	0.00275	0	0.00275	0.000926	0	0.000926
Burkina Faso	BFA	2016	0.003165	0	0.003165	0.000415	0	0.000415
Burkina Faso	BFA	2017	0.038252	0	0.038252	0.035087	0	0.035087
Burkina Faso	BFA	2018	0.053695	0	0.053695	0.015443	0	0.015443
Burkina Faso	BFA	2019	0.058027	0	0.058027	0.004332	0	0.004332
Burkina Faso	BFA	2020	0.058517	0	0.058517	0.000489998	0	0.000489998
Burkina Faso	BFA	2021	0.059302	0	0.059302	0.000785002	0	0.000785002
Burkina Faso	BFA	2022	0.089897	0	0.089897	0.030595	0	0.030595
Burkina Faso	BFA	2023	0.177042	0	0.177042	0.087145	0	0.087145
Burkina Faso	BFA	2024	0.205642	0	0.205642	0.0286	0	0.0286
Burundi	BDI	2012	0.000403	0	0.000403
Burundi	BDI	2013	0.000413	0	0.000413	1e-05	0	1e-05
Burundi	BDI	2014	0.000426	0	0.000426	1.3e-05	0	1.3e-05
Burundi	BDI	2015	0.000723	0	0.000723	0.000297	0	0.000297
Burundi	BDI	2016	0.00152	0	0.00152	0.000797	0	0.000797
Burundi	BDI	2017	0.001868	0	0.001868	0.000348	0	0.000348
Burundi	BDI	2018	0.00188	0	0.00188	1.2e-05	0	1.2e-05
Burundi	BDI	2019	0.00192	0	0.00192	4e-05	0	4e-05
Burundi	BDI	2020	0.00206	0	0.00206	0.00014	0	0.00014
Burundi	BDI	2021	0.009018	0	0.009018	0.006958	0	0.006958
Burundi	BDI	2022	0.008863	0	0.008863	-0.000154999	0	-0.000154999
Burundi	BDI	2023	0.009528	0	0.009528	0.000665	0	0.000665
Burundi	BDI	2024	0.009528	0	0.009528	0	0	0
Cambodia	KHM	2000	9.4e-05	0	9.4e-05
Cambodia	KHM	2001	0.000185	0	0.000185	9.1e-05	0	9.1e-05
Cambodia	KHM	2002	0.000283	0	0.000283	9.8e-05	0	9.8e-05
Cambodia	KHM	2003	0.000328	0	0.000328	4.5e-05	0	4.5e-05
Cambodia	KHM	2004	0.00036	0	0.00036	3.2e-05	0	3.2e-05
Cambodia	KHM	2005	0.000543	0	0.000543	0.000183	0	0.000183
Cambodia	KHM	2006	0.000693	0	0.000693	0.00015	0	0.00015
Cambodia	KHM	2007	0.001556	0	0.001556	0.000863	0	0.000863
Cambodia	KHM	2008	0.001902	0	0.001902	0.000346	0	0.000346
Cambodia	KHM	2009	0.00214	0.00025	0.00239	0.000238	0.00025	0.000488
Cambodia	KHM	2010	0.002196	0.00025	0.002446	5.6e-05	0	5.6e-05
Cambodia	KHM	2011	0.003899	0.00025	0.004149	0.001703	0	0.001703
Cambodia	KHM	2012	0.004687	0.00025	0.004937	0.000788	0	0.000788
Cambodia	KHM	2013	0.005877	0.00025	0.006127	0.00119	0	0.00119
Cambodia	KHM	2014	0.009187	0.00025	0.009437	0.00331	0	0.00331
Cambodia	KHM	2015	0.012189	0.00025	0.012439	0.003002	0	0.003002
Cambodia	KHM	2016	0.018363	0.00025	0.018613	0.006174	0	0.006174
Cambodia	KHM	2017	0.032039	0.00025	0.032289	0.013676	0	0.013676
Cambodia	KHM	2018	0.042728	0.00025	0.042978	0.010689	0	0.010689
Cambodia	KHM	2019	0.139988	0.00025	0.140238	0.09726	0	0.09726
Cambodia	KHM	2020	0.333125	0.00025	0.333375	0.193137	0	0.193137
Cambodia	KHM	2021	0.395391	0.00025	0.395641	0.062266	0	0.062266
Cambodia	KHM	2022	0.480804	0.00025	0.481054	0.085413	0	0.085413
Cambodia	KHM	2023	0.487056	0.00025	0.487306	0.006252	0	0.006252
Cambodia	KHM	2024	0.877589	0.00025	0.877839	0.390533	0	0.390533
Cameroon	CMR	2003	0.0001	0	0.0001
Cameroon	CMR	2004	0.0001	0	0.0001	0	0	0
Cameroon	CMR	2005	0.0001	0	0.0001	0	0	0
Cameroon	CMR	2006	0.0001	0	0.0001	0	0	0
Cameroon	CMR	2007	0.0002	0	0.0002	0.0001	0	0.0001
Cameroon	CMR	2008	0.0002	0	0.0002	0	0	0
Cameroon	CMR	2009	1e-05	0	1e-05	-0.00019	0	-0.00019
Cameroon	CMR	2010	1e-05	0	1e-05	0	0	0
Cameroon	CMR	2011	4e-05	0	4e-05	3e-05	0	3e-05
Cameroon	CMR	2012	5.3e-05	0	5.3e-05	1.3e-05	0	1.3e-05
Cameroon	CMR	2013	6.2e-05	0	6.2e-05	9e-06	0	9e-06
Cameroon	CMR	2014	6.7e-05	0	6.7e-05	5e-06	0	5e-06
Cameroon	CMR	2015	0.000134	0	0.000134	6.7e-05	0	6.7e-05
Cameroon	CMR	2016	0.000153	0	0.000153	1.9e-05	0	1.9e-05
Cameroon	CMR	2017	0.01158	0	0.01158	0.011427	0	0.011427
Cameroon	CMR	2018	0.011841	0	0.011841	0.000261	0	0.000261
Cameroon	CMR	2019	0.012697	0	0.012697	0.000855999	0	0.000855999
Cameroon	CMR	2020	0.01356	0	0.01356	0.000863002	0	0.000863002
Cameroon	CMR	2021	0.026236	0	0.026236	0.012676	0	0.012676
Cameroon	CMR	2022	0.026312	0	0.026312	7.6001e-05	0	7.6001e-05
Cameroon	CMR	2023	0.062652	0	0.062652	0.03634	0	0.03634
Cameroon	CMR	2024	0.062652	0	0.062652	0	0	0
Canada	CAN	2000	0	0.092	0.092
Canada	CAN	2001	0	0.131	0.131	0	0.039	0.039
Canada	CAN	2002	0	0.161	0.161	0	0.03	0.03
Canada	CAN	2003	0	0.327	0.327	0	0.166	0.166
Canada	CAN	2004	0.001	0.444	0.445	0.001	0.117	0.118
Canada	CAN	2005	0.001	0.677	0.678	0	0.233	0.233
Canada	CAN	2006	0.001	1.423	1.424	0	0.746	0.746
Canada	CAN	2007	0.002	1.84	1.842	0.001	0.417	0.418
Canada	CAN	2008	0.004	2.336	2.34	0.002	0.496	0.498
Canada	CAN	2009	0.05	3.282	3.332	0.046	0.946	0.992
Canada	CAN	2010	0.188	3.967	4.155	0.138	0.685	0.823
Canada	CAN	2011	0.423	5.265	5.688	0.235	1.298	1.533
Canada	CAN	2012	0.651	6.201	6.852	0.228	0.936	1.164
Canada	CAN	2013	1.029	7.801	8.83	0.378	1.6	1.978
Canada	CAN	2014	1.567	9.694	11.261	0.538	1.893	2.431
Canada	CAN	2015	2.141	11.214	13.355	0.574	1.52	2.094
Canada	CAN	2016	2.265	11.973	14.238	0.124	0.759	0.883
Canada	CAN	2017	2.493	12.25	14.743	0.228	0.277	0.505
Canada	CAN	2018	2.631	12.816	15.447	0.138	0.566	0.704
Canada	CAN	2019	2.828	13.22	16.048	0.197	0.404	0.601
Canada	CAN	2020	3.068	13.532	16.6	0.24	0.312	0.552
Canada	CAN	2021	3.854	13.878	17.732	0.786	0.346	1.132
Canada	CAN	2022	4.323	15.237	19.56	0.469	1.359	1.828
Canada	CAN	2023	5.328	16.137	21.465	1.005	0.9	1.905
Canada	CAN	2024	5.7734	17.5239	23.2973	0.4454	1.3869	1.8323
Cape Verde	CPV	2002	0	0.0021	0.0021
Cape Verde	CPV	2003	0	0.00268	0.00268	0	0.00058	0.00058
Cape Verde	CPV	2004	0	0.0024	0.0024	0	-0.00028	-0.00028
Cape Verde	CPV	2005	0	0.0024	0.0024	0	0	0
Cape Verde	CPV	2006	0	0.0021	0.0021	0	-0.0003	-0.0003
Cape Verde	CPV	2007	0	0.0021	0.0021	0	0	0
Cape Verde	CPV	2008	0	0.0021	0.0021	0	0	0
Cape Verde	CPV	2009	0	0.0021	0.0021	0	0	0
Cape Verde	CPV	2010	0.0055	0.0018	0.0073	0.0055	-0.0003	0.0052
Cape Verde	CPV	2011	0.0055	0.017	0.0225	0	0.0152	0.0152
Cape Verde	CPV	2012	0.005574	0.0272	0.032774	7.4e-05	0.0102	0.010274
Cape Verde	CPV	2013	0.005574	0.0272	0.032774	0	0	0
Cape Verde	CPV	2014	0.005574	0.0272	0.032774	0	0	0
Cape Verde	CPV	2015	0.005959	0.0272	0.033159	0.000385	0	0.000385
Cape Verde	CPV	2016	0.006059	0.0272	0.033259	0.0001	0	0.0001
Cape Verde	CPV	2017	0.006217	0.0272	0.033417	0.000158	0	0.000158
Cape Verde	CPV	2018	0.01071	0.0269	0.03761	0.004493	-0.000300001	0.004193
Cape Verde	CPV	2019	0.014072	0.0269	0.040972	0.003362	0	0.003362
Cape Verde	CPV	2020	0.01488	0.0269	0.04178	0.000808001	0	0.000808001
Cape Verde	CPV	2021	0.017094	0.0269	0.043994	0.002214	0	0.002214
Cape Verde	CPV	2022	0.022941	0.0269	0.049841	0.005847	0	0.005847
Cape Verde	CPV	2023	0.026043	0.0268	0.052843	0.003102	-9.9999e-05	0.003002
Cape Verde	CPV	2024	0.031043	0.0268	0.057843	0.005	0	0.005
Cayman Islands	CYM	2016	0.002754	0	0.002754
Cayman Islands	CYM	2017	0.008766	0	0.008766	0.006012	0	0.006012
Cayman Islands	CYM	2018	0.009917	0.0008	0.010717	0.001151	0.0008	0.001951
Cayman Islands	CYM	2019	0.011194	0.0008	0.011994	0.001277	0	0.001277
Cayman Islands	CYM	2020	0.012837	0.0008	0.013637	0.001643	0	0.001643
Cayman Islands	CYM	2021	0.013801	0.0008	0.014601	0.000964	0	0.000964
Cayman Islands	CYM	2022	0.013801	0.0008	0.014601	0	0	0
Cayman Islands	CYM	2023	0.0141	0.0008	0.0149	0.000299	0	0.000299
Cayman Islands	CYM	2024	0.0141	0.0008	0.0149	0	0	0
Central African Republic	CAF	2014	9.5e-05	0	9.5e-05
Central African Republic	CAF	2015	9.9e-05	0	9.9e-05	4e-06	0	4e-06
Central African Republic	CAF	2016	0.000209	0	0.000209	0.00011	0	0.00011
Central African Republic	CAF	2017	0.000274	0	0.000274	6.5e-05	0	6.5e-05
Central African Republic	CAF	2018	0.000299	0	0.000299	2.5e-05	0	2.5e-05
Central African Republic	CAF	2019	0.000296	0	0.000296	-3e-06	0	-3e-06
Central African Republic	CAF	2020	0.000339	0	0.000339	4.3e-05	0	4.3e-05
Central African Republic	CAF	2021	0.000337	0	0.000337	-2e-06	0	-2e-06
Central African Republic	CAF	2022	0.000334	0	0.000334	-3.00002e-06	0	-3.00002e-06
Central African Republic	CAF	2023	0.040423	0	0.040423	0.040089	0	0.040089
Central African Republic	CAF	2024	0.040423	0	0.040423	0	0	0
Chad	TCD	2010	2e-06	0	2e-06
Chad	TCD	2011	2e-06	0	2e-06	0	0	0
Chad	TCD	2012	3e-06	0	3e-06	1e-06	0	1e-06
Chad	TCD	2013	5e-05	0	5e-05	4.7e-05	0	4.7e-05
Chad	TCD	2014	5e-05	0	5e-05	0	0	0
Chad	TCD	2015	0.000172	0	0.000172	0.000122	0	0.000122
Chad	TCD	2016	0.00018	0.0011	0.00128	8e-06	0.0011	0.001108
Chad	TCD	2017	0.00019	0.0011	0.00129	9.99999e-06	0	9.99999e-06
Chad	TCD	2018	0.000562	0.0011	0.001662	0.000372	0	0.000372
Chad	TCD	2019	0.000557	0.0011	0.001657	-5e-06	0	-5e-06
Chad	TCD	2020	0.001106	0.0011	0.002206	0.000549	0	0.000549
Chad	TCD	2021	0.001592	0.0011	0.002692	0.000486	0	0.000486
Chad	TCD	2022	0.001638	0.0011	0.002738	4.6e-05	0	4.6e-05
Chad	TCD	2023	0.001662	0.0011	0.002762	2.4e-05	0	2.4e-05
Chad	TCD	2024	0.00174	0.0011	0.00284	7.8e-05	0	7.8e-05
Chile	CHL	2001	0	0.002	0.002
Chile	CHL	2002	0	0.002	0.002	0	0	0
Chile	CHL	2003	0	0.002	0.002	0	0	0
Chile	CHL	2004	0	0.002	0.002	0	0	0
Chile	CHL	2005	0	0.002	0.002	0	0	0
Chile	CHL	2006	0	0.002	0.002	0	0	0
Chile	CHL	2007	0	0.02	0.02	0	0.018	0.018
Chile	CHL	2008	0	0.02	0.02	0	0	0
Chile	CHL	2009	0	0.163	0.163	0	0.143	0.143
Chile	CHL	2010	2e-06	0.163	0.163002	2e-06	0	2e-06
Chile	CHL	2011	6e-06	0.184	0.184006	4e-06	0.021	0.021004
Chile	CHL	2012	0.002035	0.202	0.204035	0.002029	0.018	0.020029
Chile	CHL	2013	0.015058	0.301	0.316058	0.013023	0.099	0.112023
Chile	CHL	2014	0.221068	0.736	0.957068	0.20601	0.435	0.64101
Chile	CHL	2015	0.576078	0.91	1.48608	0.35501	0.174	0.52901
Chile	CHL	2016	1.12511	1.039	2.16411	0.549032	0.129	0.678032
Chile	CHL	2017	1.72435	1.302	3.02635	0.599238	0.263	0.862238
Chile	CHL	2018	2.2981	1.69227	3.99037	0.573753	0.390271	0.964024
Chile	CHL	2019	2.72078	1.99893	4.71972	0.422683	0.306663	0.729346
Chile	CHL	2020	3.28732	2.29254	5.57986	0.566538	0.293604	0.860142
Chile	CHL	2021	4.71227	3.14043	7.8527	1.42495	0.847892	2.27284
Chile	CHL	2022	6.88713	3.82404	10.7112	2.17486	0.683614	2.85848
Chile	CHL	2023	8.74224	4.5329	13.2751	1.85511	0.708852	2.56396
Chile	CHL	2024	10.8975	4.7169	15.6144	2.15529	0.184	2.33929
China	CHN	2000	0.033515	0.341	0.374515
China	CHN	2001	0.03802	0.383	0.42102	0.004505	0.042	0.046505
China	CHN	2002	0.05653	0.449	0.50553	0.01851	0.066	0.08451
China	CHN	2003	0.0666	0.547	0.6136	0.01007	0.098	0.10807
China	CHN	2004	0.0766	0.763	0.8396	0.01	0.216	0.226
China	CHN	2005	0.1412	1.06	1.2012	0.0646	0.297	0.3616
China	CHN	2006	0.1602	2.07	2.2302	0.019	1.01	1.029
China	CHN	2007	0.199	4.2	4.399	0.0388	2.13	2.1688
China	CHN	2008	0.253	8.38773	8.64073	0.054	4.18773	4.24173
China	CHN	2009	0.4148	17.5994	18.0142	0.1618	9.21168	9.37348
China	CHN	2010	1.0218	29.6335	30.6553	0.607	12.0341	12.6411
China	CHN	2011	3.1078	46.3546	49.4624	2.086	16.7211	18.8071
China	CHN	2012	6.7188	61.5969	68.3157	3.611	15.2423	18.8533
China	CHN	2013	17.7588	76.7305	94.4893	11.04	15.1337	26.1737
China	CHN	2014	28.3988	96.8191	125.218	10.64	20.0886	30.7286
China	CHN	2015	43.5488	131.048	174.597	15.15	34.2286	49.3786
China	CHN	2016	77.8188	148.517	226.336	34.27	17.4692	51.7392
China	CHN	2017	130.832	164.374	295.207	53.0135	15.8576	68.8711
China	CHN	2018	175.262	184.665	359.927	44.4296	20.2904	64.72
China	CHN	2019	204.971	209.582	414.553	29.7089	24.917	54.626
China	CHN	2020	253.864	281.993	535.856	48.893	72.4107	121.304
China	CHN	2021	306.973	328.973	635.946	53.109	46.9808	100.09
China	CHN	2022	393.032	365.964	758.996	86.059	36.9907	123.05
China	CHN	2023	609.921	441.895	1051.82	216.889	75.9308	292.82
China	CHN	2024	887.1	521.266	1408.37	277.179	79.3708	356.55
Colombia	COL	2000	0.0006	0	0.0006
Colombia	COL	2001	0.000989	0	0.000989	0.000389	0	0.000389
Colombia	COL	2002	0.001029	0	0.001029	3.99999e-05	0	3.99999e-05
Colombia	COL	2003	0.001069	0	0.001069	4e-05	0	4e-05
Colombia	COL	2004	0.001092	0.02	0.021092	2.3e-05	0.02	0.020023
Colombia	COL	2005	0.001121	0.01	0.011121	2.9e-05	-0.01	-0.009971
Colombia	COL	2006	0.001164	0.018	0.019164	4.3e-05	0.008	0.008043
Colombia	COL	2007	0.001184	0.018	0.019184	2e-05	0	2e-05
Colombia	COL	2008	0.001231	0.018	0.019231	4.7e-05	0	4.7e-05
Colombia	COL	2009	0.001255	0.018	0.019255	2.4e-05	0	2.4e-05
Colombia	COL	2010	0.001274	0.018	0.019274	1.9e-05	0	1.9e-05
Colombia	COL	2011	0.001308	0.018	0.019308	3.4e-05	0	3.4e-05
Colombia	COL	2012	0.001322	0.018	0.019322	1.4e-05	0	1.4e-05
Colombia	COL	2013	0.001383	0.018	0.019383	6.1e-05	0	6.1e-05
Colombia	COL	2014	0.001418	0.018	0.019418	3.5e-05	0	3.5e-05
Colombia	COL	2015	0.001463	0.018	0.019463	4.50001e-05	0	4.50001e-05
Colombia	COL	2016	0.00152	0.018	0.01952	5.69998e-05	0	5.69998e-05
Colombia	COL	2017	0.01132	0.018	0.02932	0.0098	0	0.0098
Colombia	COL	2018	0.013377	0.018	0.031377	0.002057	0	0.002057
Colombia	COL	2019	0.023086	0.01842	0.041506	0.009709	0.00042	0.010129
Colombia	COL	2020	0.082718	0.01842	0.101138	0.059632	0	0.059632
Colombia	COL	2021	0.180975	0.01842	0.199395	0.098257	0	0.098257
Colombia	COL	2022	0.480043	0.0338	0.513843	0.299068	0.01538	0.314448
Colombia	COL	2023	0.715986	0.0338	0.749786	0.235943	0	0.235943
Colombia	COL	2024	1.39246	0.0338	1.42626	0.676473	0	0.676473
Comoros	COM	2016	0.000805	0	0.000805
Comoros	COM	2017	0.001146	0	0.001146	0.000341	0	0.000341
Comoros	COM	2018	0.001146	0	0.001146	0	0	0
Comoros	COM	2019	0.001165	0	0.001165	1.89999e-05	0	1.89999e-05
Comoros	COM	2020	0.001152	0	0.001152	-1.3e-05	0	-1.3e-05
Comoros	COM	2021	0.003362	0	0.003362	0.00221	0	0.00221
Comoros	COM	2022	0.003034	0	0.003034	-0.000328	0	-0.000328
Comoros	COM	2023	0.00307	0	0.00307	3.60001e-05	0	3.60001e-05
Comoros	COM	2024	0.00307	0	0.00307	0	0	0
Congo	COG	2012	3e-06	0	3e-06
Congo	COG	2013	1.5e-05	0	1.5e-05	1.2e-05	0	1.2e-05
Congo	COG	2014	1.8e-05	0	1.8e-05	3e-06	0	3e-06
Congo	COG	2015	2e-05	0	2e-05	2e-06	0	2e-06
Congo	COG	2016	4e-05	0	4e-05	2e-05	0	2e-05
Congo	COG	2017	5.7e-05	0	5.7e-05	1.7e-05	0	1.7e-05
Congo	COG	2018	6.4e-05	0	6.4e-05	7e-06	0	7e-06
Congo	COG	2019	6.2e-05	0	6.2e-05	-2e-06	0	-2e-06
Congo	COG	2020	0.000522	0	0.000522	0.00046	0	0.00046
Congo	COG	2021	0.000565	0	0.000565	4.3e-05	0	4.3e-05
Congo	COG	2022	0.00064	0	0.00064	7.5e-05	0	7.5e-05
Congo	COG	2023	0.000743	0	0.000743	0.000103	0	0.000103
Congo	COG	2024	0.000743	0	0.000743	0	0	0
Cook Islands	COK	2000	5.7e-05	0	5.7e-05
Cook Islands	COK	2001	5.7e-05	0	5.7e-05	0	0	0
Cook Islands	COK	2002	5.7e-05	0	5.7e-05	0	0	0
Cook Islands	COK	2003	5.7e-05	4e-05	9.7e-05	0	4e-05	4e-05
Cook Islands	COK	2004	5.7e-05	4e-05	9.7e-05	0	0	0
Cook Islands	COK	2005	5.7e-05	4e-05	9.7e-05	0	0	0
Cook Islands	COK	2006	5.7e-05	4e-05	9.7e-05	0	0	0
Cook Islands	COK	2007	5.7e-05	4e-05	9.7e-05	0	0	0
Cook Islands	COK	2008	5.7e-05	0	5.7e-05	0	-4e-05	-4e-05
Cook Islands	COK	2009	5.7e-05	0	5.7e-05	0	0	0
Cook Islands	COK	2010	5.7e-05	0	5.7e-05	0	0	0
Cook Islands	COK	2011	5.7e-05	0	5.7e-05	0	0	0
Cook Islands	COK	2012	5.7e-05	0	5.7e-05	0	0	0
Cook Islands	COK	2013	0.000711	0	0.000711	0.000654	0	0.000654
Cook Islands	COK	2014	0.001671	0	0.001671	0.00096	0	0.00096
Cook Islands	COK	2015	0.002897	0	0.002897	0.001226	0	0.001226
Cook Islands	COK	2016	0.003011	0	0.003011	0.000114	0	0.000114
Cook Islands	COK	2017	0.003011	0	0.003011	0	0	0
Cook Islands	COK	2018	0.004833	0	0.004833	0.001822	0	0.001822
Cook Islands	COK	2019	0.00557	0	0.00557	0.000736999	0	0.000736999
Cook Islands	COK	2020	0.00557	0	0.00557	0	0	0
Cook Islands	COK	2021	0.00557	0	0.00557	0	0	0
Cook Islands	COK	2022	0.00557	0	0.00557	0	0	0
Cook Islands	COK	2023	0.00557	0	0.00557	0	0	0
Cook Islands	COK	2024	0.00557	0	0.00557	0	0	0
Costa Rica	CRI	2000	0	0.04245	0.04245
Costa Rica	CRI	2001	0	0.06225	0.06225	0	0.0198	0.0198
Costa Rica	CRI	2002	0	0.06225	0.06225	0	0	0
Costa Rica	CRI	2003	0	0.06855	0.06855	0	0.00630001	0.00630001
Costa Rica	CRI	2004	0	0.06855	0.06855	0	0	0
Costa Rica	CRI	2005	0	0.06855	0.06855	0	0	0
Costa Rica	CRI	2006	0	0.06855	0.06855	0	0	0
Costa Rica	CRI	2007	0	0.06992	0.06992	0	0.00136999	0.00136999
Costa Rica	CRI	2008	0	0.06992	0.06992	0	0	0
Costa Rica	CRI	2009	0	0.119625	0.119625	0	0.049705	0.049705
Costa Rica	CRI	2010	2e-06	0.119625	0.119627	2e-06	0	2e-06
Costa Rica	CRI	2011	0.000102	0.132785	0.132887	0.0001	0.01316	0.01326
Costa Rica	CRI	2012	0.00136	0.148085	0.149445	0.001258	0.0153	0.016558
Costa Rica	CRI	2013	0.002554	0.148085	0.150639	0.001194	0	0.001194
Costa Rica	CRI	2014	0.004767	0.196465	0.201232	0.002213	0.04838	0.050593
Costa Rica	CRI	2015	0.008525	0.278145	0.28667	0.003758	0.08168	0.085438
Costa Rica	CRI	2016	0.0134	0.319145	0.332545	0.004875	0.041	0.045875
Costa Rica	CRI	2017	0.018884	0.377825	0.396709	0.005484	0.05868	0.064164
Costa Rica	CRI	2018	0.031569	0.407775	0.439344	0.012685	0.02995	0.042635
Costa Rica	CRI	2019	0.047265	0.41092	0.458185	0.015696	0.00314504	0.018841
Costa Rica	CRI	2020	0.055763	0.39352	0.449283	0.008498	-0.0174	-0.00890202
Costa Rica	CRI	2021	0.072587	0.39022	0.462807	0.016824	-0.0033	0.013524
Costa Rica	CRI	2022	0.072593	0.39022	0.462813	6e-06	0	6e-06
Costa Rica	CRI	2023	0.072549	0.40762	0.480169	-4.401e-05	0.0174	0.017356
Costa Rica	CRI	2024	0.072549	0.402335	0.474884	0	-0.00528498	-0.00528498
Cote d'Ivoire	CIV	2014	9e-06	0	9e-06
Cote d'Ivoire	CIV	2015	0.000284	0	0.000284	0.000275	0	0.000275
Cote d'Ivoire	CIV	2016	0.00045	0	0.00045	0.000166	0	0.000166
Cote d'Ivoire	CIV	2017	0.001007	0	0.001007	0.000557	0	0.000557
Cote d'Ivoire	CIV	2018	0.002097	0	0.002097	0.00109	0	0.00109
Cote d'Ivoire	CIV	2019	0.004206	0	0.004206	0.002109	0	0.002109
Cote d'Ivoire	CIV	2020	0.006402	0	0.006402	0.002196	0	0.002196
Cote d'Ivoire	CIV	2021	0.007759	0	0.007759	0.001357	0	0.001357
Cote d'Ivoire	CIV	2022	0.009009	0	0.009009	0.00125	0	0.00125
Cote d'Ivoire	CIV	2023	0.040076	0	0.040076	0.031067	0	0.031067
Cote d'Ivoire	CIV	2024	0.040076	0	0.040076	0	0	0
Croatia	HRV	2004	0	0.006	0.006
Croatia	HRV	2005	0	0.006	0.006	0	0	0
Croatia	HRV	2006	0	0.017	0.017	0	0.011	0.011
Croatia	HRV	2007	0	0.017	0.017	0	0	0
Croatia	HRV	2008	0	0.017	0.017	0	0	0
Croatia	HRV	2009	0.0003	0.07	0.0703	0.0003	0.053	0.0533
Croatia	HRV	2010	0.0003	0.079	0.0793	0	0.009	0.009
Croatia	HRV	2011	0.0003	0.13	0.1303	0	0.051	0.051
Croatia	HRV	2012	0.004	0.18	0.184	0.0037	0.05	0.0537
Croatia	HRV	2013	0.019	0.254	0.273	0.015	0.074	0.089
Croatia	HRV	2014	0.033	0.339	0.372	0.014	0.085	0.099
Croatia	HRV	2015	0.0478	0.418	0.4658	0.0148	0.079	0.0938
Croatia	HRV	2016	0.0558	0.483	0.5388	0.008	0.065	0.073
Croatia	HRV	2017	0.06	0.5761	0.6361	0.0042	0.0931	0.0973
Croatia	HRV	2018	0.0677	0.5863	0.654	0.0077	0.0102	0.0179
Croatia	HRV	2019	0.0848	0.6463	0.7311	0.0171	0.06	0.0771
Croatia	HRV	2020	0.1085	0.8013	0.9098	0.0237	0.155	0.1787
Croatia	HRV	2021	0.1383	0.9869	1.1252	0.0298	0.1856	0.2154
Croatia	HRV	2022	0.222	0.9869	1.2089	0.0837	0	0.0837
Croatia	HRV	2023	0.4625	1.1602	1.6227	0.2405	0.1733	0.4138
Croatia	HRV	2024	0.8596	1.1912	2.0508	0.3971	0.0309999	0.4281
Cuba	CUB	2000	0	0.0005	0.0005
Cuba	CUB	2001	0	0.0005	0.0005	0	0	0
Cuba	CUB	2002	0	0.0005	0.0005	0	0	0
Cuba	CUB	2003	0	0.0005	0.0005	0	0	0
Cuba	CUB	2004	0	0.0005	0.0005	0	0	0
Cuba	CUB	2005	0	0.0043	0.0043	0	0.0038	0.0038
Cuba	CUB	2006	0	0.0043	0.0043	0	0	0
Cuba	CUB	2007	0	0.00595	0.00595	0	0.00165	0.00165
Cuba	CUB	2008	0	0.01105	0.01105	0	0.0051	0.0051
Cuba	CUB	2009	0	0.01105	0.01105	0	0	0
Cuba	CUB	2010	0	0.01555	0.01555	0	0.0045	0.0045
Cuba	CUB	2011	0	0.01555	0.01555	0	0	0
Cuba	CUB	2012	0.0006	0.01555	0.01615	0.0006	0	0.0006
Cuba	CUB	2013	0.00615	0.01555	0.0217	0.00555	0	0.00555
Cuba	CUB	2014	0.007265	0.01555	0.022815	0.001115	0	0.001115
Cuba	CUB	2015	0.018299	0.01555	0.033849	0.011034	0	0.011034
Cuba	CUB	2016	0.031412	0.01555	0.046962	0.013113	0	0.013113
Cuba	CUB	2017	0.070397	0.01555	0.085947	0.038985	0	0.038985
Cuba	CUB	2018	0.12431	0.01555	0.13986	0.053913	0	0.053913
Cuba	CUB	2019	0.151862	0.016	0.167862	0.027552	0.000449999	0.028002
Cuba	CUB	2020	0.214153	0.016	0.230153	0.062291	0	0.062291
Cuba	CUB	2021	0.24644	0.016	0.26244	0.032287	0	0.032287
Cuba	CUB	2022	0.267156	0.016	0.283156	0.020716	0	0.020716
Cuba	CUB	2023	0.279643	0.016	0.295643	0.012487	0	0.012487
Cuba	CUB	2024	0.291693	0.01645	0.308143	0.01205	0.00045	0.0125
Curacao	CUW	2000	2.5e-05	0.012	0.012025
Curacao	CUW	2001	2.5e-05	0.012	0.012025	0	0	0
Curacao	CUW	2002	2.5e-05	0.012	0.012025	0	0	0
Curacao	CUW	2003	2.5e-05	0.012	0.012025	0	0	0
Curacao	CUW	2004	2.5e-05	0.012	0.012025	0	0	0
Curacao	CUW	2005	2.5e-05	0.012	0.012025	0	0	0
Curacao	CUW	2006	2.5e-05	0.012	0.012025	0	0	0
Curacao	CUW	2007	2.5e-05	0.012	0.012025	0	0	0
Curacao	CUW	2008	2.5e-05	0.012	0.012025	0	0	0
Curacao	CUW	2009	2.5e-05	0.012	0.012025	0	0	0
Curacao	CUW	2010	2.5e-05	0.012	0.012025	0	0	0
Curacao	CUW	2011	2.5e-05	0.012	0.012025	0	0	0
Curacao	CUW	2012	0.000125	0.03	0.030125	0.0001	0.018	0.0181
Curacao	CUW	2013	0.003125	0.03	0.033125	0.003	0	0.003
Curacao	CUW	2014	0.007725	0.03	0.037725	0.0046	0	0.0046
Curacao	CUW	2015	0.010125	0.03	0.040125	0.0024	0	0.0024
Curacao	CUW	2016	0.011125	0.03	0.041125	0.001	0	0.001
Curacao	CUW	2017	0.011125	0.04725	0.058375	0	0.01725	0.01725
Curacao	CUW	2018	0.011925	0.04725	0.059175	0.000799999	0	0.000799999
Curacao	CUW	2019	0.011925	0.04725	0.059175	0	0	0
Curacao	CUW	2020	0.013225	0.04725	0.060475	0.0013	0	0.0013
Curacao	CUW	2021	0.013225	0.04725	0.060475	0	0	0
Curacao	CUW	2022	0.013225	0.04725	0.060475	0	0	0
Curacao	CUW	2023	0.013361	0.04725	0.060611	0.000136001	0	0.000136001
Curacao	CUW	2024	0.014361	0.06975	0.084111	0.001	0.0225	0.0235
Cyprus	CYP	2004	0.001	0.000225	0.001225
Cyprus	CYP	2005	0.001	0.000225	0.001225	0	0	0
Cyprus	CYP	2006	0.001	0.000225	0.001225	0	0	0
Cyprus	CYP	2007	0.001	0.000225	0.001225	0	0	0
Cyprus	CYP	2008	0.002	0.000225	0.002225	0.001	0	0.001
Cyprus	CYP	2009	0.004	0.000225	0.004225	0.002	0	0.002
Cyprus	CYP	2010	0.007	0.082225	0.089225	0.003	0.082	0.085
Cyprus	CYP	2011	0.01	0.134225	0.144225	0.003	0.052	0.055
Cyprus	CYP	2012	0.017	0.147225	0.164225	0.007	0.013	0.02
Cyprus	CYP	2013	0.035	0.147225	0.182225	0.018	0	0.018
Cyprus	CYP	2014	0.064	0.147225	0.211225	0.029	0	0.029
Cyprus	CYP	2015	0.076	0.157725	0.233725	0.012	0.0105	0.0225
Cyprus	CYP	2016	0.084	0.157725	0.241725	0.008	0	0.008
Cyprus	CYP	2017	0.110046	0.157725	0.267771	0.026046	0	0.026046
Cyprus	CYP	2018	0.118479	0.157725	0.276204	0.008433	0	0.008433
Cyprus	CYP	2019	0.151261	0.157725	0.308986	0.032782	0	0.032782
Cyprus	CYP	2020	0.229134	0.157725	0.386859	0.077873	0	0.077873
Cyprus	CYP	2021	0.314523	0.1575	0.472023	0.085389	-0.000225	0.085164
Cyprus	CYP	2022	0.424093	0.1575	0.581593	0.10957	0	0.10957
Cyprus	CYP	2023	0.58072	0.1575	0.73822	0.156627	0	0.156627
Cyprus	CYP	2024	0.72587	0.1575	0.88337	0.14515	0	0.14515
Czechia	CZE	2000	0.0001	0.002	0.0021
Czechia	CZE	2001	0.0001	0	0.0001	0	-0.002	-0.002
Czechia	CZE	2002	0.0002	0.0064	0.0066	0.0001	0.0064	0.0065
Czechia	CZE	2003	0.0003	0.0106	0.0109	0.0001	0.0042	0.0043
Czechia	CZE	2004	0.0004	0.0165	0.0169	0.0001	0.0059	0.006
Czechia	CZE	2005	0.000586	0.022	0.022586	0.000186	0.0055	0.005686
Czechia	CZE	2006	0.000841	0.0435	0.044341	0.000255	0.0215	0.021755
Czechia	CZE	2007	0.003961	0.1138	0.117761	0.00312	0.0703	0.07342
Czechia	CZE	2008	0.0395	0.15	0.1895	0.035539	0.0362	0.071739
Czechia	CZE	2009	0.4646	0.193	0.6576	0.4251	0.043	0.4681
Czechia	CZE	2010	1.727	0.213	1.94	1.2624	0.02	1.2824
Czechia	CZE	2011	1.913	0.213	2.126	0.186	0	0.186
Czechia	CZE	2012	2.022	0.258	2.28	0.109	0.045	0.154
Czechia	CZE	2013	2.0635	0.262	2.3255	0.0415	0.004	0.0455
Czechia	CZE	2014	2.0674	0.278	2.3454	0.0039	0.016	0.0199
Czechia	CZE	2015	2.0749	0.281	2.3559	0.0075	0.003	0.0105
Czechia	CZE	2016	2.0679	0.282	2.3499	-0.007	0.001	-0.006
Czechia	CZE	2017	2.06191	0.308205	2.37011	-0.005994	0.026205	0.020211
Czechia	CZE	2018	2.06752	0.3162	2.38372	0.005614	0.00799504	0.013609
Czechia	CZE	2019	2.08485	0.339414	2.42426	0.017328	0.023214	0.040542
Czechia	CZE	2020	2.12418	0.339424	2.4636	0.039329	1e-05	0.039339
Czechia	CZE	2021	2.17667	0.339414	2.51608	0.0524938	-1e-05	0.0524838
Czechia	CZE	2022	2.40376	0.339095	2.74285	0.227088	-0.000319	0.226769
Czechia	CZE	2023	3.25096	0.3425	3.59346	0.847202	0.003405	0.850607
Czechia	CZE	2024	4.15941	0.3558	4.51521	0.90845	0.0133	0.92175
Democratic Republic of Congo	COD	2011	2.3e-05	0	2.3e-05
Democratic Republic of Congo	COD	2012	8.7e-05	0	8.7e-05	6.4e-05	0	6.4e-05
Democratic Republic of Congo	COD	2013	0.000389	0	0.000389	0.000302	0	0.000302
Democratic Republic of Congo	COD	2014	0.001261	0	0.001261	0.000872	0	0.000872
Democratic Republic of Congo	COD	2015	0.001355	0	0.001355	9.40001e-05	0	9.40001e-05
Democratic Republic of Congo	COD	2016	0.004614	0	0.004614	0.003259	0	0.003259
Democratic Republic of Congo	COD	2017	0.00567	0	0.00567	0.001056	0	0.001056
Democratic Republic of Congo	COD	2018	0.008333	0	0.008333	0.002663	0	0.002663
Democratic Republic of Congo	COD	2019	0.009578	0	0.009578	0.001245	0	0.001245
Democratic Republic of Congo	COD	2020	0.014388	0	0.014388	0.00481	0	0.00481
Democratic Republic of Congo	COD	2021	0.017713	0	0.017713	0.003325	0	0.003325
Democratic Republic of Congo	COD	2022	0.022365	0	0.022365	0.004652	0	0.004652
Democratic Republic of Congo	COD	2023	0.025178	0	0.025178	0.002813	0	0.002813
Democratic Republic of Congo	COD	2024	0.030028	0	0.030028	0.00485	0	0.00485
Denmark	DNK	2000	0.001	2.39002	2.39101
Denmark	DNK	2001	0.001	2.49715	2.49815	0	0.107138	0.107138
Denmark	DNK	2002	0.002	2.89453	2.89653	0.001	0.397378	0.398378
Denmark	DNK	2003	0.002	3.11992	3.12192	0	0.225385	0.225385
Denmark	DNK	2004	0.002	3.12371	3.12571	0	0.003796	0.003796
Denmark	DNK	2005	0.003	3.12784	3.13084	0.001	0.0041242	0.0051242
Denmark	DNK	2006	0.003	3.1357	3.1387	0	0.0078598	0.0078598
Denmark	DNK	2007	0.003	3.12421	3.12721	0	-0.0114818	-0.0114818
Denmark	DNK	2008	0.003	3.16287	3.16587	0	0.038656	0.038656
Denmark	DNK	2009	0.005	3.48209	3.48709	0.002	0.319217	0.321217
Denmark	DNK	2010	0.0071	3.80183	3.80893	0.0021	0.319742	0.321842
Denmark	DNK	2011	0.0166	3.95198	3.96858	0.0095	0.150152	0.159652
Denmark	DNK	2012	0.4023	4.16194	4.56424	0.3857	0.20996	0.59566
Denmark	DNK	2013	0.5708	4.81892	5.38972	0.1685	0.656982	0.825482
Denmark	DNK	2014	0.60669	4.8864	5.49309	0.03589	0.06748	0.10337
Denmark	DNK	2015	0.782108	5.07697	5.85907	0.175418	0.190563	0.365981
Denmark	DNK	2016	0.850953	5.24514	6.0961	0.068845	0.168176	0.237021
Denmark	DNK	2017	0.90635	5.48895	6.3953	0.055397	0.243807	0.299204
Denmark	DNK	2018	0.998	6.12266	7.12066	0.09165	0.633711	0.725361
Denmark	DNK	2019	1.08	6.11054	7.19054	0.082	-0.012117	0.069883
Denmark	DNK	2020	1.3043	6.25854	7.56283	0.224295	0.147994	0.372289
Denmark	DNK	2021	1.70404	7.00395	8.70799	0.399746	0.745411	1.14516
Denmark	DNK	2022	3.0699	7.08382	10.1537	1.36586	0.0798704	1.44573
Denmark	DNK	2023	3.529	7.27701	10.806	0.4591	0.193187	0.652287
Denmark	DNK	2024	3.945	7.62101	11.566	0.416	0.344	0.76
Djibouti	DJI	2010	9e-06	0	9e-06
Djibouti	DJI	2011	1.3e-05	0	1.3e-05	4e-06	0	4e-06
Djibouti	DJI	2012	4.3e-05	0	4.3e-05	3e-05	0	3e-05
Djibouti	DJI	2013	0.000105	0	0.000105	6.2e-05	0	6.2e-05
Djibouti	DJI	2014	0.000105	0	0.000105	0	0	0
Djibouti	DJI	2015	0.000105	0	0.000105	0	0	0
Djibouti	DJI	2016	0.000405	0	0.000405	0.0003	0	0.0003
Djibouti	DJI	2017	0.000416	0	0.000416	1.1e-05	0	1.1e-05
Djibouti	DJI	2018	0.000429	0	0.000429	1.3e-05	0	1.3e-05
Djibouti	DJI	2019	0.000429	0	0.000429	0	0	0
Djibouti	DJI	2020	0.000429	0	0.000429	0	0	0
Djibouti	DJI	2021	0.000429	0.02	0.020429	0	0.02	0.02
Djibouti	DJI	2022	0.000429	0.02	0.020429	0	0	0
Djibouti	DJI	2023	0.000429	0.08	0.080429	0	0.06	0.06
Djibouti	DJI	2024	0.000429	0.08	0.080429	0	0	0
Dominica	DMA	2000	8e-05	0	8e-05
Dominica	DMA	2001	8e-05	0	8e-05	0	0	0
Dominica	DMA	2002	9e-05	0	9e-05	1e-05	0	1e-05
Dominica	DMA	2003	9e-05	0	9e-05	0	0	0
Dominica	DMA	2004	0.0001	0	0.0001	1e-05	0	1e-05
Dominica	DMA	2005	0.0001	0	0.0001	0	0	0
Dominica	DMA	2006	0.00012	0	0.00012	2e-05	0	2e-05
Dominica	DMA	2007	0.00018	0	0.00018	6e-05	0	6e-05
Dominica	DMA	2008	0.0002	0.000226	0.000426	2e-05	0.000226	0.000246
Dominica	DMA	2009	0.00021	0.000226	0.000436	9.99999e-06	0	9.99999e-06
Dominica	DMA	2010	0.00022	0.000231	0.000451	1e-05	5.00002e-06	1.5e-05
Dominica	DMA	2011	0.00022	0.000231	0.000451	0	0	0
Dominica	DMA	2012	0.00023	0.000231	0.000461	1e-05	0	1e-05
Dominica	DMA	2013	0.00023	0.000231	0.000461	0	0	0
Dominica	DMA	2014	0.00023	0.000231	0.000461	0	0	0
Dominica	DMA	2015	0.00023	0.000231	0.000461	0	0	0
Dominica	DMA	2016	0.00063	0.000231	0.000861	0.0004	0	0.0004
Dominica	DMA	2017	0.00063	0.000231	0.000861	0	0	0
Dominica	DMA	2018	0.000315	0.000231	0.000546	-0.000315	0	-0.000315
Dominica	DMA	2019	0.000315	0.000231	0.000546	0	0	0
Dominica	DMA	2020	0.000315	0.000231	0.000546	0	0	0
Dominica	DMA	2021	0.000315	0.000231	0.000546	0	0	0
Dominica	DMA	2022	0.000315	0.000231	0.000546	0	0	0
Dominica	DMA	2023	0.000315	0.000231	0.000546	0	0	0
Dominica	DMA	2024	0.000325	0.000231	0.000556	1e-05	0	1e-05
Dominican Republic	DOM	2011	1e-05	0.0335	0.03351
Dominican Republic	DOM	2012	0.00293	0.0873	0.09023	0.00292	0.0538	0.05672
Dominican Republic	DOM	2013	0.00836	0.0855	0.09386	0.00543	-0.0018	0.00363
Dominican Republic	DOM	2014	0.0148	0.0795	0.0943	0.00644	-0.006	0.00044
Dominican Republic	DOM	2015	0.0236	0.0855	0.1091	0.0088	0.006	0.0148
Dominican Republic	DOM	2016	0.07131	0.1353	0.20661	0.04771	0.0498	0.09751
Dominican Republic	DOM	2017	0.09495	0.135	0.22995	0.02364	-0.00030001	0.02334
Dominican Republic	DOM	2018	0.191	0.1833	0.3743	0.09605	0.0483	0.14435
Dominican Republic	DOM	2019	0.3348	0.3703	0.7051	0.1438	0.187	0.3308
Dominican Republic	DOM	2020	0.3855	0.3703	0.7558	0.0507	0	0.0507
Dominican Republic	DOM	2021	0.5838	0.3703	0.9541	0.1983	0	0.1983
Dominican Republic	DOM	2022	0.735169	0.4171	1.15227	0.151369	0.0468	0.198169
Dominican Republic	DOM	2023	1.07679	0.4171	1.49389	0.341618	0	0.341618
Dominican Republic	DOM	2024	1.42259	0.4327	1.85529	0.3458	0.0156	0.3614
East Timor	TLS	2004	4e-06	0	4e-06
East Timor	TLS	2005	8e-06	0	8e-06	4e-06	0	4e-06
East Timor	TLS	2006	1.2e-05	0	1.2e-05	4e-06	0	4e-06
East Timor	TLS	2007	1.6e-05	0	1.6e-05	4e-06	0	4e-06
East Timor	TLS	2008	6e-05	0	6e-05	4.4e-05	0	4.4e-05
East Timor	TLS	2009	0.0001	0	0.0001	4e-05	0	4e-05
East Timor	TLS	2010	0.00014	0	0.00014	4e-05	0	4e-05
East Timor	TLS	2011	0.000445	0	0.000445	0.000305	0	0.000305
East Timor	TLS	2012	0.00075	0	0.00075	0.000305	0	0.000305
East Timor	TLS	2013	0.000941	0	0.000941	0.000191	0	0.000191
East Timor	TLS	2014	0.001138	0	0.001138	0.000197	0	0.000197
East Timor	TLS	2015	0.001324	0	0.001324	0.000186	0	0.000186
East Timor	TLS	2016	0.001328	0	0.001328	4.0001e-06	0	4.0001e-06
East Timor	TLS	2017	0.001022	0	0.001022	-0.000306	0	-0.000306
East Timor	TLS	2018	0.000803	0	0.000803	-0.000219	0	-0.000219
East Timor	TLS	2019	0.000585	0	0.000585	-0.000218	0	-0.000218
East Timor	TLS	2020	0.000355	0	0.000355	-0.00023	0	-0.00023
East Timor	TLS	2021	0.00035	0	0.00035	-5.00001e-06	0	-5.00001e-06
East Timor	TLS	2022	0.000389	0	0.000389	3.9e-05	0	3.9e-05
East Timor	TLS	2023	0.000405	0	0.000405	1.6e-05	0	1.6e-05
East Timor	TLS	2024	0.000405	0	0.000405	0	0	0
Ecuador	ECU	2005	2e-05	0	2e-05
Ecuador	ECU	2006	2e-05	0	2e-05	0	0	0
Ecuador	ECU	2007	2e-05	0.0024	0.00242	0	0.0024	0.0024
Ecuador	ECU	2008	2e-05	0.0024	0.00242	0	0	0
Ecuador	ECU	2009	2e-05	0.0024	0.00242	0	0	0
Ecuador	ECU	2010	2e-05	0.0024	0.00242	0	0	0
Ecuador	ECU	2011	4e-05	0.0024	0.00244	2e-05	0	2e-05
Ecuador	ECU	2012	8e-05	0.0024	0.00248	4e-05	0	4e-05
Ecuador	ECU	2013	0.003898	0.0189	0.022798	0.003818	0.0165	0.020318
Ecuador	ECU	2014	0.026401	0.02115	0.047551	0.022503	0.00225	0.024753
Ecuador	ECU	2015	0.025531	0.02115	0.046681	-0.00087	0	-0.00087
Ecuador	ECU	2016	0.026471	0.02115	0.047621	0.00094	0	0.00094
Ecuador	ECU	2017	0.026471	0.02115	0.047621	0	0	0
Ecuador	ECU	2018	0.02763	0.02115	0.04878	0.001159	0	0.001159
Ecuador	ECU	2019	0.02763	0.02115	0.04878	0	0	0
Ecuador	ECU	2020	0.02763	0.02115	0.04878	0	0	0
Ecuador	ECU	2021	0.027653	0.02115	0.048803	2.2999e-05	0	2.2999e-05
Ecuador	ECU	2022	0.028653	0.02115	0.049803	0.001	0	0.001
Ecuador	ECU	2023	0.031479	0.07113	0.102609	0.002826	0.04998	0.052806
Ecuador	ECU	2024	0.031549	0.07113	0.102679	7e-05	0	7e-05
Egypt	EGY	2000	0.0001	0.074	0.0741
Egypt	EGY	2001	0.0005	0.074	0.0745	0.0004	0	0.0004
Egypt	EGY	2002	0.0006	0.074	0.0746	0.0001	0	0.0001
Egypt	EGY	2003	0.0006	0.074	0.0746	0	0	0
Egypt	EGY	2004	0.0006	0.15	0.1506	0	0.076	0.076
Egypt	EGY	2005	0.0006	0.15	0.1506	0	0	0
Egypt	EGY	2006	0.0006	0.235	0.2356	0	0.085	0.085
Egypt	EGY	2007	0.0007	0.315	0.3157	0.0001	0.08	0.0801
Egypt	EGY	2008	0.0009	0.395	0.3959	0.0002	0.08	0.0802
Egypt	EGY	2009	0.0013	0.44	0.4413	0.0004	0.045	0.0454
Egypt	EGY	2010	0.015	0.555	0.57	0.0137	0.115	0.1287
Egypt	EGY	2011	0.035	0.555	0.59	0.02	0	0.02
Egypt	EGY	2012	0.035	0.555	0.59	0	0	0
Egypt	EGY	2013	0.035	0.555	0.59	0	0	0
Egypt	EGY	2014	0.035	0.555	0.59	0	0	0
Egypt	EGY	2015	0.036	0.755	0.791	0.001	0.2	0.201
Egypt	EGY	2016	0.059	0.755	0.814	0.023	0	0.023
Egypt	EGY	2017	0.18	0.755	0.935	0.121	0	0.121
Egypt	EGY	2018	0.7642	1.13	1.8942	0.5842	0.375	0.9592
Egypt	EGY	2019	1.6472	1.132	2.7792	0.883	0.002	0.885
Egypt	EGY	2020	1.643	1.38	3.023	-0.0042	0.248	0.2438
Egypt	EGY	2021	1.6625	1.64	3.3025	0.0195	0.26	0.2795
Egypt	EGY	2022	1.72454	1.6425	3.36704	0.06204	0.0025	0.06454
Egypt	EGY	2023	1.85628	1.89	3.74628	0.13174	0.2475	0.37924
Egypt	EGY	2024	2.59028	2.199	4.78928	0.734	0.309	1.043
El Salvador	SLV	2000	4.4e-05	0	4.4e-05
El Salvador	SLV	2001	4.4e-05	0	4.4e-05	0	0	0
El Salvador	SLV	2002	4.4e-05	0	4.4e-05	0	0	0
El Salvador	SLV	2003	4.4e-05	0	4.4e-05	0	0	0
El Salvador	SLV	2004	4.4e-05	0	4.4e-05	0	0	0
El Salvador	SLV	2005	4.4e-05	0	4.4e-05	0	0	0
El Salvador	SLV	2006	4.4e-05	0	4.4e-05	0	0	0
El Salvador	SLV	2007	4.4e-05	0	4.4e-05	0	0	0
El Salvador	SLV	2008	4.4e-05	0	4.4e-05	0	0	0
El Salvador	SLV	2009	4.4e-05	0	4.4e-05	0	0	0
El Salvador	SLV	2010	4.4e-05	0	4.4e-05	0	0	0
El Salvador	SLV	2011	5.3e-05	0	5.3e-05	9e-06	0	9e-06
El Salvador	SLV	2012	5.3e-05	0	5.3e-05	0	0	0
El Salvador	SLV	2013	0.000151	0	0.000151	9.8e-05	0	9.8e-05
El Salvador	SLV	2014	0.000151	0	0.000151	0	0	0
El Salvador	SLV	2015	0.011013	0	0.011013	0.010862	0	0.010862
El Salvador	SLV	2016	0.012119	0	0.012119	0.001106	0	0.001106
El Salvador	SLV	2017	0.109744	0	0.109744	0.097625	0	0.097625
El Salvador	SLV	2018	0.166596	0	0.166596	0.056852	0	0.056852
El Salvador	SLV	2019	0.410421	0	0.410421	0.243825	0	0.243825
El Salvador	SLV	2020	0.47855	0.036	0.51455	0.068129	0.036	0.104129
El Salvador	SLV	2021	0.543207	0.054	0.597207	0.064657	0.018	0.0826571
El Salvador	SLV	2022	0.571281	0.054	0.625281	0.028074	0	0.028074
El Salvador	SLV	2023	0.646906	0.054	0.700906	0.075625	0	0.075625
El Salvador	SLV	2024	0.647991	0.054	0.701991	0.00108494	0	0.00108494
Equatorial Guinea	GNQ	2016	0.00016	0	0.00016
Equatorial Guinea	GNQ	2017	0.000354	0	0.000354	0.000194	0	0.000194
Equatorial Guinea	GNQ	2018	0.000354	0	0.000354	0	0	0
Equatorial Guinea	GNQ	2019	0.000336	0	0.000336	-1.8e-05	0	-1.8e-05
Equatorial Guinea	GNQ	2020	0.000325	0	0.000325	-1.1e-05	0	-1.1e-05
Equatorial Guinea	GNQ	2021	0.000189	0	0.000189	-0.000136	0	-0.000136
Equatorial Guinea	GNQ	2022	6e-06	0	6e-06	-0.000183	0	-0.000183
Equatorial Guinea	GNQ	2023	6e-06	0	6e-06	0	0	0
Equatorial Guinea	GNQ	2024	6e-06	0	6e-06	0	0	0
Eritrea	ERI	2007	1e-06	0.000825	0.000826
Eritrea	ERI	2008	1e-06	0.000825	0.000826	0	0	0
Eritrea	ERI	2009	1e-06	0.000825	0.000826	0	0	0
Eritrea	ERI	2010	4e-06	0.000825	0.000829	3e-06	0	3e-06
Eritrea	ERI	2011	5e-06	0.000825	0.00083	1e-06	0	1e-06
Eritrea	ERI	2012	2.3e-05	0.000825	0.000848	1.8e-05	0	1.8e-05
Eritrea	ERI	2013	3.5e-05	0.000825	0.00086	1.2e-05	0	1.2e-05
Eritrea	ERI	2014	0.007859	0.000825	0.008684	0.007824	0	0.007824
Eritrea	ERI	2015	0.007859	0.000825	0.008684	0	0	0
Eritrea	ERI	2016	0.009014	0.000825	0.009839	0.001155	0	0.001155
Eritrea	ERI	2017	0.023354	0.000825	0.024179	0.01434	0	0.01434
Eritrea	ERI	2018	0.025864	0.000825	0.026689	0.00251	0	0.00251
Eritrea	ERI	2019	0.025919	0.000825	0.026744	5.5002e-05	0	5.5002e-05
Eritrea	ERI	2020	0.025906	0.000825	0.026731	-1.3002e-05	0	-1.3002e-05
Eritrea	ERI	2021	0.025125	0.000825	0.02595	-0.000781	0	-0.000781
Eritrea	ERI	2022	0.024785	0.000825	0.02561	-0.000340001	0	-0.000340001
Eritrea	ERI	2023	0.024785	0.000825	0.02561	0	0	0
Eritrea	ERI	2024	0.024785	0.000825	0.02561	0	0	0
Estonia	EST	2002	0	0.001	0.001
Estonia	EST	2003	0	0.003	0.003	0	0.002	0.002
Estonia	EST	2004	0	0.007	0.007	0	0.004	0.004
Estonia	EST	2005	0	0.031	0.031	0	0.024	0.024
Estonia	EST	2006	0	0.031	0.031	0	0	0
Estonia	EST	2007	0	0.05	0.05	0	0.019	0.019
Estonia	EST	2008	0	0.077	0.077	0	0.027	0.027
Estonia	EST	2009	0.0001	0.104	0.1041	0.0001	0.027	0.0271
Estonia	EST	2010	0.0001	0.108	0.1081	0	0.004	0.004
Estonia	EST	2011	0.0002	0.18	0.1802	0.0001	0.072	0.0721
Estonia	EST	2012	0.00038	0.266	0.26638	0.00018	0.086	0.08618
Estonia	EST	2013	0.0015	0.248	0.2495	0.00112	-0.018	-0.01688
Estonia	EST	2014	0.00334	0.275	0.27834	0.00184	0.027	0.02884
Estonia	EST	2015	0.0065	0.3	0.3065	0.00316	0.025	0.02816
Estonia	EST	2016	0.01	0.31	0.32	0.0035	0.01	0.0135
Estonia	EST	2017	0.015	0.3118	0.3268	0.005	0.00179997	0.00679997
Estonia	EST	2018	0.0319	0.31	0.3419	0.0169	-0.00179997	0.0151
Estonia	EST	2019	0.1206	0.316	0.4366	0.0887	0.006	0.0947
Estonia	EST	2020	0.20767	0.317	0.52467	0.08707	0.001	0.08807
Estonia	EST	2021	0.39477	0.316	0.71077	0.1871	-0.001	0.1861
Estonia	EST	2022	0.52	0.316	0.836	0.12523	0	0.12523
Estonia	EST	2023	0.813	0.337	1.15	0.293	0.021	0.314
Estonia	EST	2024	1.326	0.572	1.898	0.513	0.235	0.748
Eswatini	SWZ	2015	2.6e-05	0	2.6e-05
Eswatini	SWZ	2016	0.000127	0	0.000127	0.000101	0	0.000101
Eswatini	SWZ	2017	0.00013	0	0.00013	3e-06	0	3e-06
Eswatini	SWZ	2018	0.00013	0	0.00013	0	0	0
Eswatini	SWZ	2019	0.000142	0	0.000142	1.2e-05	0	1.2e-05
Eswatini	SWZ	2020	0.000177	0	0.000177	3.5e-05	0	3.5e-05
Eswatini	SWZ	2021	0.010177	0	0.010177	0.01	0	0.01
Eswatini	SWZ	2022	0.010164	0	0.010164	-1.3e-05	0	-1.3e-05
Eswatini	SWZ	2023	0.027947	0	0.027947	0.017783	0	0.017783
Eswatini	SWZ	2024	0.027947	0	0.027947	0	0	0
Ethiopia	ETH	2007	1e-06	0	1e-06
Ethiopia	ETH	2008	1e-06	0	1e-06	0	0	0
Ethiopia	ETH	2009	2.8e-05	0	2.8e-05	2.7e-05	0	2.7e-05
Ethiopia	ETH	2010	2.8e-05	0	2.8e-05	0	0	0
Ethiopia	ETH	2011	0.000335	0.081	0.081335	0.000307	0.081	0.081307
Ethiopia	ETH	2012	0.001148	0.081	0.082148	0.000813	0	0.000813
Ethiopia	ETH	2013	0.003344	0.171	0.174344	0.002196	0.09	0.092196
Ethiopia	ETH	2014	0.009131	0.171	0.180131	0.005787	0	0.005787
Ethiopia	ETH	2015	0.00989	0.324	0.33389	0.000759001	0.153	0.153759
Ethiopia	ETH	2016	0.01404	0.324006	0.338046	0.00415	6.02e-06	0.00415602
Ethiopia	ETH	2017	0.012494	0.324006	0.3365	-0.001546	0	-0.001546
Ethiopia	ETH	2018	0.012346	0.324006	0.336352	-0.000148001	0	-0.000148001
Ethiopia	ETH	2019	0.012346	0.324006	0.336352	0	0	0
Ethiopia	ETH	2020	0.020184	0.324006	0.34419	0.007838	0	0.007838
Ethiopia	ETH	2021	0.021184	0.324006	0.34519	0.001	0	0.001
Ethiopia	ETH	2022	0.021184	0.404006	0.42519	0	0.08	0.08
Ethiopia	ETH	2023	0.021184	0.324006	0.34519	0	-0.08	-0.08
Ethiopia	ETH	2024	0.021554	0.404006	0.42556	0.00037	0.08	0.08037
Falkland Islands	FLK	2000	0	0.00026	0.00026
Falkland Islands	FLK	2001	0	0.00026	0.00026	0	0	0
Falkland Islands	FLK	2002	0	0.00026	0.00026	0	0	0
Falkland Islands	FLK	2003	0	0.00026	0.00026	0	0	0
Falkland Islands	FLK	2004	0	0.00026	0.00026	0	0	0
Falkland Islands	FLK	2005	0	0.00026	0.00026	0	0	0
Falkland Islands	FLK	2006	0	0.00026	0.00026	0	0	0
Falkland Islands	FLK	2007	0	0.00125	0.00125	0	0.00099	0.00099
Falkland Islands	FLK	2008	0	0.00133	0.00133	0	8e-05	8e-05
Falkland Islands	FLK	2009	0	0.00133	0.00133	0	0	0
Falkland Islands	FLK	2010	0	0.00232	0.00232	0	0.00099	0.00099
Falkland Islands	FLK	2011	0	0.00232	0.00232	0	0	0
Falkland Islands	FLK	2012	0	0.00232	0.00232	0	0	0
Falkland Islands	FLK	2013	0	0.00232	0.00232	0	0	0
Falkland Islands	FLK	2014	0	0.00331	0.00331	0	0.00099	0.00099
Falkland Islands	FLK	2015	7e-05	0.00331	0.00338	7e-05	0	7e-05
Falkland Islands	FLK	2016	7e-05	0.00331	0.00338	0	0	0
Falkland Islands	FLK	2017	7e-05	0.00331	0.00338	0	0	0
Falkland Islands	FLK	2018	7e-05	0.00331	0.00338	0	0	0
Falkland Islands	FLK	2019	7e-05	0.00331	0.00338	0	0	0
Falkland Islands	FLK	2020	7e-05	0.00331	0.00338	0	0	0
Falkland Islands	FLK	2021	7e-05	0.00331	0.00338	0	0	0
Falkland Islands	FLK	2022	7e-05	0.00331	0.00338	0	0	0
Falkland Islands	FLK	2023	7e-05	0.00331	0.00338	0	0	0
Falkland Islands	FLK	2024	8.2e-05	0.00331	0.003392	1.2e-05	0	1.2e-05
Faroe Islands	FRO	2000	0	0.00015	0.00015
Faroe Islands	FRO	2001	0	0.00015	0.00015	0	0	0
Faroe Islands	FRO	2002	0	0.00015	0.00015	0	0	0
Faroe Islands	FRO	2003	0	0.00213	0.00213	0	0.00198	0.00198
Faroe Islands	FRO	2004	0	0.00213	0.00213	0	0	0
Faroe Islands	FRO	2005	0	0.00411	0.00411	0	0.00198	0.00198
Faroe Islands	FRO	2006	0	0.00411	0.00411	0	0	0
Faroe Islands	FRO	2007	0	0.00411	0.00411	0	0	0
Faroe Islands	FRO	2008	0	0.00411	0.00411	0	0	0
Faroe Islands	FRO	2009	0	0.00411	0.00411	0	0	0
Faroe Islands	FRO	2010	0	0.00411	0.00411	0	0	0
Faroe Islands	FRO	2011	0	0.00411	0.00411	0	0	0
Faroe Islands	FRO	2012	0	0.00861	0.00861	0	0.0045	0.0045
Faroe Islands	FRO	2013	0	0.00861	0.00861	0	0	0
Faroe Islands	FRO	2014	0	0.02031	0.02031	0	0.0117	0.0117
Faroe Islands	FRO	2015	0	0.02031	0.02031	0	0	0
Faroe Islands	FRO	2016	0	0.02031	0.02031	0	0	0
Faroe Islands	FRO	2017	0	0.02031	0.02031	0	0	0
Faroe Islands	FRO	2018	0	0.01635	0.01635	0	-0.00396	-0.00396
Faroe Islands	FRO	2019	0.000261	0.01275	0.013011	0.000261	-0.0036	-0.003339
Faroe Islands	FRO	2020	0.000261	0.01905	0.019311	0	0.0063	0.0063
Faroe Islands	FRO	2021	0.000261	0.0225	0.022761	0	0.00345	0.00345
Faroe Islands	FRO	2022	0.000261	0.0477	0.047961	0	0.0252	0.0252
Faroe Islands	FRO	2023	0.000261	0.0657	0.065961	0	0.018	0.018
Faroe Islands	FRO	2024	0.000261	0.06768	0.067941	0	0.00198	0.00198
Fiji	FJI	2000	0.000148	6e-05	0.000208
Fiji	FJI	2001	0.000148	6e-05	0.000208	0	0	0
Fiji	FJI	2002	0.000148	6e-05	0.000208	0	0	0
Fiji	FJI	2003	0.000114	6e-05	0.000174	-3.4e-05	0	-3.4e-05
Fiji	FJI	2004	4e-05	0	4e-05	-7.4e-05	-6e-05	-0.000134
Fiji	FJI	2005	0.000113	0	0.000113	7.3e-05	0	7.3e-05
Fiji	FJI	2006	0.000141	0	0.000141	2.8e-05	0	2.8e-05
Fiji	FJI	2007	0.000141	0.010175	0.010316	0	0.010175	0.010175
Fiji	FJI	2008	0.000175	0.010175	0.01035	3.4e-05	0	3.4e-05
Fiji	FJI	2009	0.000198	0.010175	0.010373	2.3e-05	0	2.3e-05
Fiji	FJI	2010	0.000282	0.010175	0.010457	8.4e-05	0	8.4e-05
Fiji	FJI	2011	0.000284	0.010175	0.010459	2e-06	0	2e-06
Fiji	FJI	2012	0.000926	0.010175	0.011101	0.000642	0	0.000642
Fiji	FJI	2013	0.001629	0.010175	0.011804	0.000703	0	0.000703
Fiji	FJI	2014	0.0022	0.010175	0.012375	0.000571	0	0.000571
Fiji	FJI	2015	0.004198	0.010175	0.014373	0.001998	0	0.001998
Fiji	FJI	2016	0.006249	0.010175	0.016424	0.002051	0	0.002051
Fiji	FJI	2017	0.008158	0.010175	0.018333	0.001909	0	0.001909
Fiji	FJI	2018	0.00873	0.010175	0.018905	0.000572	0	0.000572
Fiji	FJI	2019	0.008824	0.010175	0.018999	9.4e-05	0	9.4e-05
Fiji	FJI	2020	0.009176	0.010175	0.019351	0.000352	0	0.000352
Fiji	FJI	2021	0.009465	0.010175	0.01964	0.000289001	0	0.000289001
Fiji	FJI	2022	0.009907	0.010175	0.020082	0.000442	0	0.000442
Fiji	FJI	2023	0.010929	0.010175	0.021104	0.001022	0	0.001022
Fiji	FJI	2024	0.010937	0.010175	0.021112	8.001e-06	0	8.001e-06
Finland	FIN	2000	0.002	0.038	0.04
Finland	FIN	2001	0.003	0.039	0.042	0.001	0.001	0.002
Finland	FIN	2002	0.003	0.043	0.046	0	0.004	0.004
Finland	FIN	2003	0.003	0.052	0.055	0	0.009	0.009
Finland	FIN	2004	0.004	0.082	0.086	0.001	0.03	0.031
Finland	FIN	2005	0.004	0.082	0.086	0	0	0
Finland	FIN	2006	0.005	0.086	0.091	0.001	0.004	0.005
Finland	FIN	2007	0.005	0.11	0.115	0	0.024	0.024
Finland	FIN	2008	0.006	0.143	0.149	0.001	0.033	0.034
Finland	FIN	2009	0.006	0.147	0.153	0	0.004	0.004
Finland	FIN	2010	0.007	0.197	0.204	0.001	0.05	0.051
Finland	FIN	2011	0.007	0.199	0.206	0	0.002	0.002
Finland	FIN	2012	0.008	0.257	0.265	0.001	0.058	0.059
Finland	FIN	2013	0.009	0.447	0.456	0.001	0.19	0.191
Finland	FIN	2014	0.011	0.627	0.638	0.002	0.18	0.182
Finland	FIN	2015	0.017	1.005	1.022	0.006	0.378	0.384
Finland	FIN	2016	0.037	1.565	1.602	0.02	0.56	0.58
Finland	FIN	2017	0.077	2.044	2.121	0.04	0.479	0.519
Finland	FIN	2018	0.133	2.041	2.174	0.056	-0.003	0.053
Finland	FIN	2019	0.21	2.284	2.494	0.077	0.243	0.32
Finland	FIN	2020	0.299	2.586	2.885	0.089	0.302	0.391
Finland	FIN	2021	0.398	3.257	3.655	0.099	0.671	0.77
Finland	FIN	2022	0.649	5.677	6.326	0.251	2.42	2.671
Finland	FIN	2023	0.986206	6.946	7.93221	0.337206	1.269	1.60621
Finland	FIN	2024	1.20321	8.36	9.56321	0.217	1.414	1.631
France	FRA	2000	0.007	0.038	0.045
France	FRA	2001	0.007	0.066	0.073	0	0.028	0.028
France	FRA	2002	0.008	0.138	0.146	0.001	0.072	0.073
France	FRA	2003	0.009	0.218	0.227	0.001	0.08	0.081
France	FRA	2004	0.011	0.358	0.369	0.002	0.14	0.142
France	FRA	2005	0.013	0.69	0.703	0.002	0.332	0.334
France	FRA	2006	0.015	1.412	1.427	0.002	0.722	0.724
France	FRA	2007	0.026	2.223	2.249	0.011	0.811	0.822
France	FRA	2008	0.08	3.403	3.483	0.054	1.18	1.234
France	FRA	2009	0.277	4.582	4.859	0.197	1.179	1.376
France	FRA	2010	1.044	5.912	6.956	0.767	1.33	2.097
France	FRA	2011	2.98858	6.75802	9.74659	1.94458	0.846016	2.79059
France	FRA	2012	4.30076	7.6075	11.9083	1.31218	0.84948	2.16166
France	FRA	2013	5.16028	8.16013	13.3204	0.859526	0.552634	1.41216
France	FRA	2014	5.86141	9.20139	15.0628	0.701122	1.04126	1.74239
France	FRA	2015	6.81954	10.2981	17.1177	0.958134	1.09675	2.05489
France	FRA	2016	7.31908	11.5666	18.8856	0.499538	1.26842	1.76795
France	FRA	2017	8.10041	13.4994	21.5998	0.781334	1.93279	2.71412
France	FRA	2018	9.03164	14.9001	23.9318	0.931229	1.40079	2.33202
France	FRA	2019	10.0132	16.4269	26.44	0.981541	1.52671	2.50825
France	FRA	2020	11.1333	17.5353	28.6685	1.12007	1.10842	2.22849
France	FRA	2021	13.446	18.5511	31.9972	2.31279	1.01585	3.32863
France	FRA	2022	14.7218	20.8352	35.557	1.27575	2.28406	3.5598
France	FRA	2023	17.3991	23.1316	40.5307	2.67735	2.29644	4.97379
France	FRA	2024	21.5281	24.5916	46.1197	4.12895	1.46	5.58895
French Guiana	GUF	2000	0.0001	0	0.0001
French Guiana	GUF	2001	0.0001	0	0.0001	0	0	0
French Guiana	GUF	2002	0.0001	0	0.0001	0	0	0
French Guiana	GUF	2003	0.0001	0	0.0001	0	0	0
French Guiana	GUF	2004	0.0001	0	0.0001	0	0	0
French Guiana	GUF	2005	0.000222	0	0.000222	0.000122	0	0.000122
French Guiana	GUF	2006	0.000222	0	0.000222	0	0	0
French Guiana	GUF	2007	0.000574	0	0.000574	0.000352	0	0.000352
French Guiana	GUF	2008	0.000673	0	0.000673	9.90001e-05	0	9.90001e-05
French Guiana	GUF	2009	0.002342	0	0.002342	0.001669	0	0.001669
French Guiana	GUF	2010	0.022993	0	0.022993	0.020651	0	0.020651
French Guiana	GUF	2011	0.035981	0	0.035981	0.012988	0	0.012988
French Guiana	GUF	2012	0.036441	0	0.036441	0.00046	0	0.00046
French Guiana	GUF	2013	0.036697	0	0.036697	0.000256	0	0.000256
French Guiana	GUF	2014	0.037017	0	0.037017	0.00032	0	0.00032
French Guiana	GUF	2015	0.051063	0	0.051063	0.014046	0	0.014046
French Guiana	GUF	2016	0.051063	0	0.051063	0	0	0
French Guiana	GUF	2017	0.051119	0	0.051119	5.6e-05	0	5.6e-05
French Guiana	GUF	2018	0.051119	0	0.051119	0	0	0
French Guiana	GUF	2019	0.053842	0	0.053842	0.002723	0	0.002723
French Guiana	GUF	2020	0.054996	0	0.054996	0.001154	0	0.001154
French Guiana	GUF	2021	0.055272	0	0.055272	0.000275998	0	0.000275998
French Guiana	GUF	2022	0.055272	0	0.055272	0	0	0
French Guiana	GUF	2023	0.055272	0	0.055272	0	0	0
French Guiana	GUF	2024	0.055272	0	0.055272	0	0	0
French Polynesia	PYF	2000	0.000548	0.00012	0.000668
French Polynesia	PYF	2001	0.000698	0.00012	0.000818	0.00015	0	0.00015
French Polynesia	PYF	2002	0.000828	0.00012	0.000948	0.00013	0	0.00013
French Polynesia	PYF	2003	0.001022	0.00012	0.001142	0.000194	0	0.000194
French Polynesia	PYF	2004	0.001249	0.000135	0.001384	0.000227	1.5e-05	0.000242
French Polynesia	PYF	2005	0.001531	0.000135	0.001666	0.000282	0	0.000282
French Polynesia	PYF	2006	0.001849	0.000135	0.001984	0.000318	0	0.000318
French Polynesia	PYF	2007	0.002119	0.000158	0.002277	0.00027	2.3e-05	0.000293
French Polynesia	PYF	2008	0.002459	0.000368	0.002827	0.00034	0.00021	0.00055
French Polynesia	PYF	2009	0.002762	0.000368	0.00313	0.000303	0	0.000303
French Polynesia	PYF	2010	0.0029	0.000248	0.003148	0.000138	-0.00012	1.80002e-05
French Polynesia	PYF	2011	0.011	0.000248	0.011248	0.0081	0	0.0081
French Polynesia	PYF	2012	0.01418	0.000248	0.014428	0.00318	0	0.00318
French Polynesia	PYF	2013	0.0191	0.000248	0.019348	0.00492	0	0.00492
French Polynesia	PYF	2014	0.0255	0.000248	0.025748	0.0064	0	0.0064
French Polynesia	PYF	2015	0.0295	0.000248	0.029748	0.004	0	0.004
French Polynesia	PYF	2016	0.0319	0.000248	0.032148	0.0024	0	0.0024
French Polynesia	PYF	2017	0.0348	0.000248	0.035048	0.0029	0	0.0029
French Polynesia	PYF	2018	0.0381	0.000248	0.038348	0.0033	0	0.0033
French Polynesia	PYF	2019	0.0411	0.000248	0.041348	0.003	0	0.003
French Polynesia	PYF	2020	0.044614	0.000248	0.044862	0.003514	0	0.003514
French Polynesia	PYF	2021	0.045675	0.000248	0.045923	0.001061	0	0.001061
French Polynesia	PYF	2022	0.052122	0.000248	0.05237	0.006447	0	0.006447
French Polynesia	PYF	2023	0.052868	0.000248	0.053116	0.000746003	0	0.000746003
French Polynesia	PYF	2024	0.072572	0.000248	0.07282	0.019704	0	0.019704
Gabon	GAB	2009	2e-05	0	2e-05
Gabon	GAB	2010	2e-05	0	2e-05	0	0	0
Gabon	GAB	2011	2e-05	0	2e-05	0	0	0
Gabon	GAB	2012	2e-05	0	2e-05	0	0	0
Gabon	GAB	2013	4.6e-05	0	4.6e-05	2.6e-05	0	2.6e-05
Gabon	GAB	2014	4.6e-05	0	4.6e-05	0	0	0
Gabon	GAB	2015	5.8e-05	0	5.8e-05	1.2e-05	0	1.2e-05
Gabon	GAB	2016	6.6e-05	0	6.6e-05	8e-06	0	8e-06
Gabon	GAB	2017	8.1e-05	0	8.1e-05	1.5e-05	0	1.5e-05
Gabon	GAB	2018	8.6e-05	0	8.6e-05	5e-06	0	5e-06
Gabon	GAB	2019	9.8e-05	0	9.8e-05	1.2e-05	0	1.2e-05
Gabon	GAB	2020	9e-05	0	9e-05	-8e-06	0	-8e-06
Gabon	GAB	2021	0.00049	0	0.00049	0.0004	0	0.0004
Gabon	GAB	2022	0.00051	0	0.00051	2e-05	0	2e-05
Gabon	GAB	2023	0.00054	0	0.00054	3e-05	0	3e-05
Gabon	GAB	2024	0.01154	0	0.01154	0.011	0	0.011
Gambia	GMB	2006	4.8e-05	0	4.8e-05
Gambia	GMB	2007	6.8e-05	0	6.8e-05	2e-05	0	2e-05
Gambia	GMB	2008	7e-05	0	7e-05	2e-06	0	2e-06
Gambia	GMB	2009	7.2e-05	0.00015	0.000222	2e-06	0.00015	0.000152
Gambia	GMB	2010	0.000183	0.00015	0.000333	0.000111	0	0.000111
Gambia	GMB	2011	0.000183	0.00015	0.000333	0	0	0
Gambia	GMB	2012	0.000186	0.00105	0.001236	3e-06	0.0009	0.000903
Gambia	GMB	2013	0.000283	0.00105	0.001333	9.7e-05	0	9.7e-05
Gambia	GMB	2014	0.000384	0.001214	0.001598	0.000101	0.000164	0.000265
Gambia	GMB	2015	0.000504	0.001214	0.001718	0.00012	0	0.00012
Gambia	GMB	2016	0.000975	0.001214	0.002189	0.000471	0	0.000471
Gambia	GMB	2017	0.001286	0.001214	0.0025	0.000311	0	0.000311
Gambia	GMB	2018	0.001325	0.001214	0.002539	3.90001e-05	0	3.90001e-05
Gambia	GMB	2019	0.001829	0.001214	0.003043	0.000504	0	0.000504
Gambia	GMB	2020	0.001819	0.001214	0.003033	-1e-05	0	-1e-05
Gambia	GMB	2021	0.001806	0.001214	0.00302	-1.3e-05	0	-1.3e-05
Gambia	GMB	2022	0.001722	0.001214	0.002936	-8.40002e-05	0	-8.40002e-05
Gambia	GMB	2023	0.00173	0.001214	0.002944	8.0002e-06	0	8.0002e-06
Gambia	GMB	2024	0.02473	0.001214	0.025944	0.023	0	0.023
Georgia	GEO	2016	0.0003	0.02	0.0203
Georgia	GEO	2017	0.00045	0.02	0.02045	0.00015	0	0.00015
Georgia	GEO	2018	0.000922	0.02	0.020922	0.000472	0	0.000472
Georgia	GEO	2019	0.002736	0.021	0.023736	0.001814	0.001	0.002814
Georgia	GEO	2020	0.004656	0.021	0.025656	0.00192	0	0.00192
Georgia	GEO	2021	0.018466	0.021	0.039466	0.01381	0	0.01381
Georgia	GEO	2022	0.035256	0.02102	0.056276	0.01679	2e-05	0.01681
Georgia	GEO	2023	0.064076	0.021053	0.085129	0.02882	3.3e-05	0.028853
Georgia	GEO	2024	0.132606	0.021053	0.153659	0.06853	0	0.06853
Germany	DEU	2000	0.114	6.095	6.209
Germany	DEU	2001	0.195	8.754	8.949	0.081	2.659	2.74
Germany	DEU	2002	0.26	12.001	12.261	0.065	3.247	3.312
Germany	DEU	2003	0.435	14.381	14.816	0.175	2.38	2.555
Germany	DEU	2004	1.105	16.419	17.524	0.67	2.038	2.708
Germany	DEU	2005	2.056	18.248	20.304	0.951	1.829	2.78
Germany	DEU	2006	2.899	20.474	23.373	0.843	2.226	3.069
Germany	DEU	2007	4.17	22.116	26.286	1.271	1.642	2.913
Germany	DEU	2008	6.12	22.794	28.914	1.95	0.678	2.628
Germany	DEU	2009	10.566	25.732	36.298	4.446	2.938	7.384
Germany	DEU	2010	18.006	26.903	44.909	7.44	1.171	8.611
Germany	DEU	2011	25.832	28.712	54.544	7.826	1.809	9.635
Germany	DEU	2012	33.77	30.979	64.749	7.938	2.267	10.205
Germany	DEU	2013	36.283	33.477	69.76	2.513	2.498	5.011
Germany	DEU	2014	37.398	38.614	76.012	1.115	5.137	6.252
Germany	DEU	2015	38.601	44.58	83.181	1.203	5.966	7.169
Germany	DEU	2016	39.908	49.435	89.343	1.307	4.855	6.162
Germany	DEU	2017	41.404	55.58	96.984	1.496	6.145	7.641
Germany	DEU	2018	44.035	58.721	102.756	2.631	3.141	5.772
Germany	DEU	2019	47.487	60.742	108.229	3.452	2.021	5.473
Germany	DEU	2020	51.785	62.201	113.986	4.298	1.459	5.757
Germany	DEU	2021	57.463	63.711	121.174	5.678	1.51	7.188
Germany	DEU	2022	61.188	66.202	127.39	3.725	2.491	6.216
Germany	DEU	2023	74.882	69.486	144.368	13.694	3.284	16.978
Germany	DEU	2024	89.943	72.823	162.766	15.061	3.337	18.398
Ghana	GHA	2013	0.003139	0	0.003139
Ghana	GHA	2014	0.007639	0	0.007639	0.0045	0	0.0045
Ghana	GHA	2015	0.032228	2e-05	0.032248	0.024589	2e-05	0.024609
Ghana	GHA	2016	0.036523	2e-05	0.036543	0.004295	0	0.004295
Ghana	GHA	2017	0.042309	2e-05	0.042329	0.00578599	0	0.00578599
Ghana	GHA	2018	0.072316	2e-05	0.072336	0.030007	0	0.030007
Ghana	GHA	2019	0.083157	2e-05	0.083177	0.010841	0	0.010841
Ghana	GHA	2020	0.107852	2e-05	0.107872	0.024695	0	0.024695
Ghana	GHA	2021	0.165424	2e-05	0.165444	0.057572	0	0.057572
Ghana	GHA	2022	0.168954	2e-05	0.168974	0.00353001	0	0.00353001
Ghana	GHA	2023	0.187982	2e-05	0.188002	0.019028	0	0.019028
Ghana	GHA	2024	0.187982	2e-05	0.188002	0	0	0
Greece	GRC	2000	0	0.226	0.226
Greece	GRC	2001	0.001	0.27	0.271	0.001	0.044	0.045
Greece	GRC	2002	0.001	0.287	0.288	0	0.017	0.017
Greece	GRC	2003	0.001	0.371	0.372	0	0.084	0.084
Greece	GRC	2004	0.001	0.47	0.471	0	0.099	0.099
Greece	GRC	2005	0.001	0.491	0.492	0	0.021	0.021
Greece	GRC	2006	0.005	0.749	0.754	0.004	0.258	0.262
Greece	GRC	2007	0.009	0.846	0.855	0.004	0.097	0.101
Greece	GRC	2008	0.012	1.022	1.034	0.003	0.176	0.179
Greece	GRC	2009	0.046	1.171	1.217	0.034	0.149	0.183
Greece	GRC	2010	0.202	1.298	1.5	0.156	0.127	0.283
Greece	GRC	2011	0.612	1.64	2.252	0.41	0.342	0.752
Greece	GRC	2012	1.536	1.753	3.289	0.924	0.113	1.037
Greece	GRC	2013	2.579	1.809	4.388	1.043	0.056	1.099
Greece	GRC	2014	2.596	1.978	4.574	0.017	0.169	0.186
Greece	GRC	2015	2.604	2.091	4.695	0.008	0.113	0.121
Greece	GRC	2016	2.604	2.37	4.974	0	0.279	0.279
Greece	GRC	2017	2.55154	2.624	5.17554	-0.052461	0.254	0.201539
Greece	GRC	2018	2.59103	2.8775	5.46853	0.0394911	0.253495	0.292986
Greece	GRC	2019	2.7538	3.589	6.3428	0.162773	0.711505	0.874278
Greece	GRC	2020	3.17373	4.11925	7.29298	0.419922	0.53025	0.950172
Greece	GRC	2021	4.0734	4.64913	8.72253	0.899675	0.52988	1.42955
Greece	GRC	2022	5.10408	4.70233	9.80641	1.03068	0.0532	1.08388
Greece	GRC	2023	6.6887	5.2317	11.9204	1.58462	0.529373	2.114
Greece	GRC	2024	9.26865	5.3572	14.6259	2.57995	0.1255	2.70545
Greenland	GRL	2018	0.000139	5e-05	0.000189
Greenland	GRL	2019	0.000139	5e-05	0.000189	0	0	0
Greenland	GRL	2020	0.000341	5e-05	0.000391	0.000202	0	0.000202
Greenland	GRL	2021	0.00059	5e-05	0.00064	0.000249	0	0.000249
Greenland	GRL	2022	0.00062	5.6e-05	0.000676	3e-05	6e-06	3.6e-05
Greenland	GRL	2023	0.00062	5.6e-05	0.000676	0	0	0
Greenland	GRL	2024	0.000725	7.1e-05	0.000796	0.000105	1.5e-05	0.00012
Grenada	GRD	2008	6.9e-05	8e-05	0.000149
Grenada	GRD	2009	0.000112	8e-05	0.000192	4.3e-05	0	4.3e-05
Grenada	GRD	2010	0.000179	8e-05	0.000259	6.7e-05	0	6.7e-05
Grenada	GRD	2011	0.00027	8e-05	0.00035	9.1e-05	0	9.1e-05
Grenada	GRD	2012	0.000312	8e-05	0.000392	4.2e-05	0	4.2e-05
Grenada	GRD	2013	0.000515	8e-05	0.000595	0.000203	0	0.000203
Grenada	GRD	2014	0.000698	8e-05	0.000778	0.000183	0	0.000183
Grenada	GRD	2015	0.001023	8e-05	0.001103	0.000325	0	0.000325
Grenada	GRD	2016	0.002185	8e-05	0.002265	0.001162	0	0.001162
Grenada	GRD	2017	0.002282	8e-05	0.002362	9.70002e-05	0	9.70002e-05
Grenada	GRD	2018	0.002655	8e-05	0.002735	0.000373	0	0.000373
Grenada	GRD	2019	0.003274	8e-05	0.003354	0.000619	0	0.000619
Grenada	GRD	2020	0.0036	8e-05	0.00368	0.000326	0	0.000326
Grenada	GRD	2021	0.003654	8e-05	0.003734	5.40001e-05	0	5.40001e-05
Grenada	GRD	2022	0.003654	8e-05	0.003734	0	0	0
Grenada	GRD	2023	0.00378	8e-05	0.00386	0.000126	0	0.000126
Grenada	GRD	2024	0.00378	8e-05	0.00386	0	0	0
Guadeloupe	GLP	2000	0	0.00642	0.00642
Guadeloupe	GLP	2001	0	0.00972	0.00972	0	0.0033	0.0033
Guadeloupe	GLP	2002	0	0.01192	0.01192	0	0.0022	0.0022
Guadeloupe	GLP	2003	0	0.01786	0.01786	0	0.00594	0.00594
Guadeloupe	GLP	2004	0	0.01786	0.01786	0	0	0
Guadeloupe	GLP	2005	0.000559	0.01786	0.018419	0.000559	0	0.000559
Guadeloupe	GLP	2006	0.001715	0.01979	0.021505	0.001156	0.00193	0.003086
Guadeloupe	GLP	2007	0.00272	0.022815	0.025535	0.001005	0.003025	0.00403
Guadeloupe	GLP	2008	0.005034	0.02419	0.029224	0.002314	0.001375	0.003689
Guadeloupe	GLP	2009	0.011074	0.02419	0.035264	0.00604	0	0.00604
Guadeloupe	GLP	2010	0.022478	0.02584	0.048318	0.011404	0.00165	0.013054
Guadeloupe	GLP	2011	0.055066	0.02584	0.080906	0.032588	0	0.032588
Guadeloupe	GLP	2012	0.066879	0.02584	0.092719	0.011813	0	0.011813
Guadeloupe	GLP	2013	0.068675	0.02584	0.094515	0.001796	0	0.001796
Guadeloupe	GLP	2014	0.069599	0.02584	0.095439	0.000923996	0	0.000923996
Guadeloupe	GLP	2015	0.069864	0.026815	0.096679	0.000265	0.000975	0.00124
Guadeloupe	GLP	2016	0.069863	0.027335	0.097198	-1e-06	0.00052	0.000519
Guadeloupe	GLP	2017	0.070492	0.027335	0.097827	0.000629	0	0.000629
Guadeloupe	GLP	2018	0.072217	0.043335	0.115552	0.001725	0.016	0.017725
Guadeloupe	GLP	2019	0.083472	0.048435	0.131907	0.011255	0.0051	0.016355
Guadeloupe	GLP	2020	0.087605	0.042105	0.12971	0.00413301	-0.00633	-0.00219699
Guadeloupe	GLP	2021	0.089896	0.052005	0.141901	0.00229099	0.0099	0.012191
Guadeloupe	GLP	2022	0.093032	0.056025	0.149057	0.00313599	0.00402	0.007156
Guadeloupe	GLP	2023	0.095	0.056025	0.151025	0.001968	0	0.001968
Guadeloupe	GLP	2024	0.095	0.057025	0.152025	0	0.000999998	0.000999998
Guam	GUM	2009	4.5e-05	0	4.5e-05
Guam	GUM	2010	9e-05	0	9e-05	4.5e-05	0	4.5e-05
Guam	GUM	2011	0.000135	0	0.000135	4.5e-05	0	4.5e-05
Guam	GUM	2012	0.000315	0	0.000315	0.00018	0	0.00018
Guam	GUM	2013	0.00081	0	0.00081	0.000495	0	0.000495
Guam	GUM	2014	0.00144	0	0.00144	0.00063	0	0.00063
Guam	GUM	2015	0.03195	0	0.03195	0.03051	0	0.03051
Guam	GUM	2016	0.03465	0.000275	0.034925	0.0027	0.000275	0.002975
Guam	GUM	2017	0.0363	0.000275	0.036575	0.00165	0	0.00165
Guam	GUM	2018	0.03808	0.000275	0.038355	0.00178	0	0.00178
Guam	GUM	2019	0.03973	0.000275	0.040005	0.00165	0	0.00165
Guam	GUM	2020	0.04138	0.000275	0.041655	0.00165	0	0.00165
Guam	GUM	2021	0.04303	0.000275	0.043305	0.00165	0	0.00165
Guam	GUM	2022	0.10468	0.000275	0.104955	0.06165	0	0.06165
Guam	GUM	2023	0.104797	0.000275	0.105072	0.000117	0	0.000117
Guam	GUM	2024	0.104797	0.000275	0.105072	0	0	0
Guatemala	GTM	2011	0.000129	0	0.000129
Guatemala	GTM	2012	0.000129	0	0.000129	0	0	0
Guatemala	GTM	2013	0.000129	0	0.000129	0	0	0
Guatemala	GTM	2014	0.005149	0	0.005149	0.00502	0	0.00502
Guatemala	GTM	2015	0.08516	0.0759	0.16106	0.080011	0.0759	0.155911
Guatemala	GTM	2016	0.085222	0.0759	0.161122	6.2e-05	0	6.2e-05
Guatemala	GTM	2017	0.092949	0.0759	0.168849	0.007727	0	0.007727
Guatemala	GTM	2018	0.092985	0.1074	0.200385	3.6008e-05	0.0315	0.031536
Guatemala	GTM	2019	0.093146	0.1074	0.200546	0.000161	0	0.000161
Guatemala	GTM	2020	0.093656	0.1074	0.201056	0.000509992	0	0.000509992
Guatemala	GTM	2021	0.093793	0.1074	0.201193	0.000137004	0	0.000137004
Guatemala	GTM	2022	0.097059	0.1074	0.204459	0.003266	0	0.003266
Guatemala	GTM	2023	0.101896	0.1074	0.209296	0.004837	0	0.004837
Guatemala	GTM	2024	0.101896	0.1074	0.209296	0	0	0
Guinea	GIN	2012	2e-05	0	2e-05
Guinea	GIN	2013	0.000111	0	0.000111	9.1e-05	0	9.1e-05
Guinea	GIN	2014	0.000111	0	0.000111	0	0	0
Guinea	GIN	2015	0.000113	0	0.000113	2e-06	0	2e-06
Guinea	GIN	2016	0.000267	0	0.000267	0.000154	0	0.000154
Guinea	GIN	2017	0.000466	0	0.000466	0.000199	0	0.000199
Guinea	GIN	2018	0.01298	0	0.01298	0.012514	0	0.012514
Guinea	GIN	2019	0.014094	0	0.014094	0.001114	0	0.001114
Guinea	GIN	2020	0.01471	0	0.01471	0.000616	0	0.000616
Guinea	GIN	2021	0.015041	0	0.015041	0.000331	0	0.000331
Guinea	GIN	2022	0.016139	0	0.016139	0.001098	0	0.001098
Guinea	GIN	2023	0.016876	0	0.016876	0.000736999	0	0.000736999
Guinea	GIN	2024	0.016876	0	0.016876	0	0	0
Guinea-Bissau	GNB	2009	1e-06	0	1e-06
Guinea-Bissau	GNB	2010	6e-06	0	6e-06	5e-06	0	5e-06
Guinea-Bissau	GNB	2011	1.5e-05	0	1.5e-05	9e-06	0	9e-06
Guinea-Bissau	GNB	2012	1.7e-05	0	1.7e-05	2e-06	0	2e-06
Guinea-Bissau	GNB	2013	7.1e-05	0	7.1e-05	5.4e-05	0	5.4e-05
Guinea-Bissau	GNB	2014	0.000121	0	0.000121	5e-05	0	5e-05
Guinea-Bissau	GNB	2015	0.000185	0	0.000185	6.4e-05	0	6.4e-05
Guinea-Bissau	GNB	2016	0.000702	0	0.000702	0.000517	0	0.000517
Guinea-Bissau	GNB	2017	0.000947	0	0.000947	0.000245	0	0.000245
Guinea-Bissau	GNB	2018	0.001828	0	0.001828	0.000881	0	0.000881
Guinea-Bissau	GNB	2019	0.001824	0	0.001824	-4e-06	0	-4e-06
Guinea-Bissau	GNB	2020	0.001763	0	0.001763	-6.1e-05	0	-6.1e-05
Guinea-Bissau	GNB	2021	0.002053	0	0.002053	0.00029	0	0.00029
Guinea-Bissau	GNB	2022	0.001805	0	0.001805	-0.000248	0	-0.000248
Guinea-Bissau	GNB	2023	0.00198	0	0.00198	0.000175	0	0.000175
Guinea-Bissau	GNB	2024	0.00198	0	0.00198	0	0	0
Guyana	GUY	2000	1.1e-05	1e-05	2.1e-05
Guyana	GUY	2001	1.1e-05	1e-05	2.1e-05	0	0	0
Guyana	GUY	2002	1.1e-05	1e-05	2.1e-05	0	0	0
Guyana	GUY	2003	1.7e-05	1e-05	2.7e-05	6e-06	0	6e-06
Guyana	GUY	2004	1.7e-05	1e-05	2.7e-05	0	0	0
Guyana	GUY	2005	4e-05	1e-05	5e-05	2.3e-05	0	2.3e-05
Guyana	GUY	2006	7.1e-05	1e-05	8.1e-05	3.1e-05	0	3.1e-05
Guyana	GUY	2007	9.3e-05	1e-05	0.000103	2.2e-05	0	2.2e-05
Guyana	GUY	2008	0.000158	1e-05	0.000168	6.5e-05	0	6.5e-05
Guyana	GUY	2009	0.000207	1e-05	0.000217	4.9e-05	0	4.9e-05
Guyana	GUY	2010	0.000421	1e-05	0.000431	0.000214	0	0.000214
Guyana	GUY	2011	0.001296	1e-05	0.001306	0.000875	0	0.000875
Guyana	GUY	2012	0.001466	1e-05	0.001476	0.00017	0	0.00017
Guyana	GUY	2013	0.00167	3e-05	0.0017	0.000204	2e-05	0.000224
Guyana	GUY	2014	0.001853	4e-05	0.001893	0.000183	1e-05	0.000193
Guyana	GUY	2015	0.001881	4e-05	0.001921	2.80001e-05	0	2.80001e-05
Guyana	GUY	2016	0.002326	4e-05	0.002366	0.000445	0	0.000445
Guyana	GUY	2017	0.003428	4e-05	0.003468	0.001102	0	0.001102
Guyana	GUY	2018	0.005843	4e-05	0.005883	0.002415	0	0.002415
Guyana	GUY	2019	0.007111	4e-05	0.007151	0.001268	0	0.001268
Guyana	GUY	2020	0.007323	4e-05	0.007363	0.000212	0	0.000212
Guyana	GUY	2021	0.007145	4e-05	0.007185	-0.000178	0	-0.000178
Guyana	GUY	2022	0.012619	4e-05	0.012659	0.005474	0	0.005474
Guyana	GUY	2023	0.017266	4e-05	0.017306	0.004647	0	0.004647
Guyana	GUY	2024	0.017486	4e-05	0.017526	0.00022	0	0.00022
Haiti	HTI	2001	0.000309	0	0.000309
Haiti	HTI	2002	0.000309	0	0.000309	0	0	0
Haiti	HTI	2003	0.000309	0	0.000309	0	0	0
Haiti	HTI	2009	1e-05	0	1e-05	-0.000299	0	-0.000299
Haiti	HTI	2010	0.000558	0	0.000558	0.000548	0	0.000548
Haiti	HTI	2011	0.000586	0	0.000586	2.8e-05	0	2.8e-05
Haiti	HTI	2012	0.001158	0	0.001158	0.000572	0	0.000572
Haiti	HTI	2013	0.001411	0	0.001411	0.000253	0	0.000253
Haiti	HTI	2014	0.001597	0	0.001597	0.000186	0	0.000186
Haiti	HTI	2015	0.001964	0	0.001964	0.000367	0	0.000367
Haiti	HTI	2016	0.002245	0	0.002245	0.000281	0	0.000281
Haiti	HTI	2017	0.002739	0	0.002739	0.000494	0	0.000494
Haiti	HTI	2018	0.003139	2.4e-05	0.003163	0.0004	2.4e-05	0.000424
Haiti	HTI	2019	0.002974	2.4e-05	0.002998	-0.000165	0	-0.000165
Haiti	HTI	2020	0.002956	2.4e-05	0.00298	-1.8e-05	0	-1.8e-05
Haiti	HTI	2021	0.002971	2.4e-05	0.002995	1.5e-05	0	1.5e-05
Haiti	HTI	2022	0.003185	2.4e-05	0.003209	0.000214	0	0.000214
Haiti	HTI	2023	0.003878	2.4e-05	0.003902	0.000693	0	0.000693
Haiti	HTI	2024	0.003878	2.4e-05	0.003902	0	0	0
Honduras	HND	2000	0.001599	0	0.001599
Honduras	HND	2001	0.001804	0	0.001804	0.000205	0	0.000205
Honduras	HND	2002	0.001975	0	0.001975	0.000171	0	0.000171
Honduras	HND	2003	0.002128	0	0.002128	0.000153	0	0.000153
Honduras	HND	2004	0.002376	0	0.002376	0.000248	0	0.000248
Honduras	HND	2005	0.002668	0	0.002668	0.000292	0	0.000292
Honduras	HND	2006	0.002872	0	0.002872	0.000204	0	0.000204
Honduras	HND	2007	0.003228	0	0.003228	0.000356	0	0.000356
Honduras	HND	2008	0.003228	0	0.003228	0	0	0
Honduras	HND	2009	0.003512	0	0.003512	0.000284	0	0.000284
Honduras	HND	2010	0.003728	0	0.003728	0.000216	0	0.000216
Honduras	HND	2011	0.004479	0.102	0.106479	0.000751	0.102	0.102751
Honduras	HND	2012	0.005156	0.102	0.107156	0.000677	0	0.000677
Honduras	HND	2013	0.005156	0.102	0.107156	0	0	0
Honduras	HND	2014	0.005156	0.152	0.157156	0	0.05	0.05
Honduras	HND	2015	0.396156	0.1559	0.552056	0.391	0.00389999	0.3949
Honduras	HND	2016	0.41213	0.1789	0.59103	0.015974	0.023	0.038974
Honduras	HND	2017	0.454609	0.2289	0.683509	0.042479	0.05	0.092479
Honduras	HND	2018	0.514521	0.2289	0.743421	0.059912	0	0.059912
Honduras	HND	2019	0.517952	0.2389	0.756852	0.00343097	0.00999999	0.013431
Honduras	HND	2020	0.525076	0.2389	0.763976	0.00712406	0	0.00712406
Honduras	HND	2021	0.528712	0.2389	0.767612	0.003636	0	0.003636
Honduras	HND	2022	0.528812	0.2389	0.767712	9.997e-05	0	9.997e-05
Honduras	HND	2023	0.528812	0.2389	0.767712	0	0	0
Honduras	HND	2024	0.553812	0.2389	0.792712	0.025	0	0.025
Hong Kong	HKG	2017	0.001	0.000803	0.001803
Hong Kong	HKG	2018	0.001	0.000803	0.001803	0	0	0
Hong Kong	HKG	2019	0.089	0.000803	0.089803	0.088	0	0.088
Hong Kong	HKG	2020	0.091	0.000803	0.091803	0.002	0	0.002
Hong Kong	HKG	2021	0.095341	0.000803	0.096144	0.004341	0	0.004341
Hong Kong	HKG	2022	0.1848	0.0008	0.1856	0.089459	-2.9999e-06	0.089456
Hong Kong	HKG	2023	0.3331	0.0008	0.3339	0.1483	0	0.1483
Hong Kong	HKG	2024	0.3331	0.0008	0.3339	0	0	0
Hungary	HUN	2001	0	0.001	0.001
Hungary	HUN	2002	0	0.001	0.001	0	0	0
Hungary	HUN	2003	0	0.003	0.003	0	0.002	0.002
Hungary	HUN	2004	0	0.003	0.003	0	0	0
Hungary	HUN	2005	0	0.017	0.017	0	0.014	0.014
Hungary	HUN	2006	0	0.033	0.033	0	0.016	0.016
Hungary	HUN	2007	0.0004	0.061	0.0614	0.0004	0.028	0.0284
Hungary	HUN	2008	0.001	0.134	0.135	0.0006	0.073	0.0736
Hungary	HUN	2009	0.001	0.203	0.204	0	0.069	0.069
Hungary	HUN	2010	0.002	0.293	0.295	0.001	0.09	0.091
Hungary	HUN	2011	0.004	0.331	0.335	0.002	0.038	0.04
Hungary	HUN	2012	0.012	0.325	0.337	0.008	-0.006	0.002
Hungary	HUN	2013	0.035	0.329	0.364	0.023	0.004	0.027
Hungary	HUN	2014	0.089	0.329	0.418	0.054	0	0.054
Hungary	HUN	2015	0.172	0.329	0.501	0.083	0	0.083
Hungary	HUN	2016	0.235	0.329	0.564	0.063	0	0.063
Hungary	HUN	2017	0.344	0.329	0.673	0.109	0	0.109
Hungary	HUN	2018	0.728	0.329	1.057	0.384	0	0.384
Hungary	HUN	2019	1.4	0.323	1.723	0.672	-0.006	0.666
Hungary	HUN	2020	2.131	0.323	2.454	0.731	0	0.731
Hungary	HUN	2021	2.968	0.324	3.292	0.837	0.001	0.838
Hungary	HUN	2022	4.235	0.324	4.559	1.267	0	1.267
Hungary	HUN	2023	5.91	0.324	6.234	1.675	0	1.675
Hungary	HUN	2024	7.699	0.324	8.023	1.789	0	1.789
Iceland	ISL	2012	0.00064	0	0.00064
Iceland	ISL	2013	0.00092	0.002	0.00292	0.00028	0.002	0.00228
Iceland	ISL	2014	0.001139	0.003	0.004139	0.000219	0.001	0.001219
Iceland	ISL	2015	0.002539	0.003	0.005539	0.0014	0	0.0014
Iceland	ISL	2016	0.003527	0.003	0.006527	0.000988	0	0.000988
Iceland	ISL	2017	0.004333	0.00243	0.006763	0.000806	-0.00057	0.000236
Iceland	ISL	2018	0.005275	0.0024	0.007675	0.000942	-3e-05	0.000912
Iceland	ISL	2019	0.007001	0.0024	0.009401	0.001726	0	0.001726
Iceland	ISL	2020	0.007001	0.0018	0.008801	0	-0.0006	-0.0006
Iceland	ISL	2021	0.007001	0.0018	0.008801	0	0	0
Iceland	ISL	2022	0.007037	0.001908	0.008945	3.6e-05	0.000108	0.000144
Iceland	ISL	2023	0.007037	0.00364	0.010677	0	0.001732	0.001732
Iceland	ISL	2024	0.007037	0.00364	0.010677	0	0	0
India	IND	2000	0	0.941	0.941
India	IND	2001	0.005535	1.563	1.56854	0.005535	0.622	0.627535
India	IND	2002	0.006705	1.606	1.61271	0.00117	0.043	0.04417
India	IND	2003	0.007885	2.461	2.46889	0.00118	0.855	0.85618
India	IND	2004	0.00781	3.813	3.82081	-7.5001e-05	1.352	1.35192
India	IND	2005	0.013439	4.4339	4.44734	0.005629	0.6209	0.626529
India	IND	2006	0.011475	6.315	6.32648	-0.001964	1.8811	1.87914
India	IND	2007	0.028831	7.84452	7.87335	0.017356	1.52952	1.54688
India	IND	2008	0.031454	10.2425	10.274	0.002623	2.39798	2.4006
India	IND	2009	0.043094	10.925	10.9681	0.01164	0.6825	0.69414
India	IND	2010	0.068832	13.184	13.2528	0.025738	2.259	2.28474
India	IND	2011	0.569285	16.179	16.7483	0.500453	2.995	3.49545
India	IND	2012	0.985571	17.2997	18.2853	0.416286	1.1207	1.53699
India	IND	2013	1.60282	18.4204	20.0232	0.617249	1.1207	1.73795
India	IND	2014	3.77601	22.4653	26.2413	2.17319	4.0449	6.2181
India	IND	2015	5.69699	25.0882	30.7852	1.92098	2.62289	4.54386
India	IND	2016	9.98214	28.7004	38.6826	4.28515	3.61225	7.8974
India	IND	2017	18.2568	32.8485	51.1053	8.27471	4.14802	12.4227
India	IND	2018	27.4847	35.2881	62.7728	9.22788	2.43964	11.6675
India	IND	2019	35.2502	37.5052	72.7554	7.76547	2.21708	9.98255
India	IND	2020	39.7055	38.5586	78.2641	4.45526	1.05342	5.50868
India	IND	2021	49.9787	40.0673	90.046	10.2733	1.50867	11.7819
India	IND	2022	63.4785	41.9298	105.408	13.4998	1.86252	15.3623
India	IND	2023	73.0516	44.7362	117.788	9.57309	2.80645	12.3795
India	IND	2024	97.5763	48.1632	145.739	24.5247	3.42692	27.9516
Indonesia	IDN	2000	0.000341	0	0.000341
Indonesia	IDN	2001	0.000613	0	0.000613	0.000272	0	0.000272
Indonesia	IDN	2002	0.000937	0	0.000937	0.000324	0	0.000324
Indonesia	IDN	2003	0.001304	0	0.001304	0.000367	0	0.000367
Indonesia	IDN	2004	0.001333	0	0.001333	2.89999e-05	0	2.89999e-05
Indonesia	IDN	2005	0.001386	0	0.001386	5.30002e-05	0	5.30002e-05
Indonesia	IDN	2006	0.002216	0	0.002216	0.00083	0	0.00083
Indonesia	IDN	2007	0.005702	0.0001	0.005802	0.003486	0.0001	0.003586
Indonesia	IDN	2008	0.009504	0.00026	0.009764	0.003802	0.00016	0.003962
Indonesia	IDN	2009	0.013436	0.00106	0.014496	0.003932	0.0008	0.004732
Indonesia	IDN	2010	0.014581	0.00034	0.014921	0.001145	-0.00072	0.000425
Indonesia	IDN	2011	0.016989	0.00093	0.017919	0.002408	0.00059	0.002998
Indonesia	IDN	2012	0.026423	0.00093	0.027353	0.009434	0	0.009434
Indonesia	IDN	2013	0.038376	0.00063	0.039006	0.011953	-0.0003	0.011653
Indonesia	IDN	2014	0.041647	0.00112	0.042767	0.003271	0.00049	0.003761
Indonesia	IDN	2015	0.078618	0.00146	0.080078	0.036971	0.00034	0.037311
Indonesia	IDN	2016	0.088484	0.00146	0.089944	0.009866	0	0.009866
Indonesia	IDN	2017	0.097407	0.00146	0.098867	0.008923	0	0.008923
Indonesia	IDN	2018	0.068276	0.14351	0.211786	-0.029131	0.14205	0.112919
Indonesia	IDN	2019	0.157802	0.15431	0.312112	0.089526	0.0108	0.100326
Indonesia	IDN	2020	0.166138	0.15431	0.320448	0.008336	0	0.008336
Indonesia	IDN	2021	0.220938	0.15431	0.375248	0.0548	0	0.0548
Indonesia	IDN	2022	0.305887	0.15431	0.460197	0.084949	0	0.084949
Indonesia	IDN	2023	0.630257	0.1523	0.782557	0.32437	-0.00201	0.32236
Indonesia	IDN	2024	0.941787	0.1523	1.09409	0.31153	0	0.31153
Iran	IRN	2000	0	0.011	0.011
Iran	IRN	2001	5e-06	0.011	0.011005	5e-06	0	5e-06
Iran	IRN	2002	5e-06	0.012	0.012005	0	0.001	0.001
Iran	IRN	2003	5e-06	0.016	0.016005	0	0.004	0.004
Iran	IRN	2004	3.5e-05	0.0249	0.024935	3e-05	0.0089	0.00893
Iran	IRN	2005	3.5e-05	0.037	0.037035	0	0.0121	0.0121
Iran	IRN	2006	7.7e-05	0.047	0.047077	4.2e-05	0.01	0.010042
Iran	IRN	2007	0.000108	0.063	0.063108	3.1e-05	0.016	0.016031
Iran	IRN	2008	0.00011	0.063	0.06311	2e-06	0	2e-06
Iran	IRN	2009	0.000173	0.092	0.092173	6.3e-05	0.029	0.029063
Iran	IRN	2010	0.000389	0.095	0.095389	0.000216	0.003	0.003216
Iran	IRN	2011	0.000448	0.09821	0.098658	5.9e-05	0.00321	0.003269
Iran	IRN	2012	0.000448	0.10613	0.106578	0	0.00792	0.00792
Iran	IRN	2013	0.000987	0.10763	0.108617	0.000539	0.0015	0.002039
Iran	IRN	2014	0.009378	0.14878	0.158158	0.008391	0.04115	0.049541
Iran	IRN	2015	0.009378	0.15344	0.162818	0	0.00466	0.00466
Iran	IRN	2016	0.043208	0.19094	0.234148	0.03383	0.0375	0.07133
Iran	IRN	2017	0.184478	0.259	0.443478	0.14127	0.06806	0.20933
Iran	IRN	2018	0.286378	0.282	0.568378	0.1019	0.023	0.1249
Iran	IRN	2019	0.345878	0.30492	0.650798	0.0595	0.02292	0.08242
Iran	IRN	2020	0.429768	0.30808	0.737848	0.08389	0.00315998	0.08705
Iran	IRN	2021	0.455858	0.3102	0.766058	0.02609	0.00212	0.02821
Iran	IRN	2022	0.539378	0.342	0.881378	0.08352	0.0318	0.11532
Iran	IRN	2023	0.595028	0.36489	0.959918	0.05565	0.02289	0.07854
Iran	IRN	2024	0.781638	0.3763	1.15794	0.18661	0.01141	0.19802
Iraq	IRQ	2013	0.0295	0	0.0295
Iraq	IRQ	2014	0.0365	0	0.0365	0.007	0	0.007
Iraq	IRQ	2015	0.0365	0	0.0365	0	0	0
Iraq	IRQ	2016	0.0365	0	0.0365	0	0	0
Iraq	IRQ	2017	0.0365	0	0.0365	0	0	0
Iraq	IRQ	2018	0.037076	0	0.037076	0.000576	0	0.000576
Iraq	IRQ	2019	0.037076	0	0.037076	0	0	0
Iraq	IRQ	2020	0.037076	0	0.037076	0	0	0
Iraq	IRQ	2021	0.037076	0	0.037076	0	0	0
Iraq	IRQ	2022	0.041576	0	0.041576	0.0045	0	0.0045
Iraq	IRQ	2023	0.041576	0	0.041576	0	0	0
Iraq	IRQ	2024	0.041576	0	0.041576	0	0	0
Ireland	IRL	2000	0	0.1165	0.1165
Ireland	IRL	2001	0	0.1229	0.1229	0	0.0064	0.0064
Ireland	IRL	2002	0	0.1348	0.1348	0	0.0119	0.0119
Ireland	IRL	2003	0	0.2103	0.2103	0	0.0755	0.0755
Ireland	IRL	2004	0	0.3364	0.3364	0	0.1261	0.1261
Ireland	IRL	2005	0	0.4933	0.4933	0	0.1569	0.1569
Ireland	IRL	2006	0	0.6765	0.6765	0	0.1832	0.1832
Ireland	IRL	2007	0	0.7405	0.7405	0	0.064	0.064
Ireland	IRL	2008	0	0.9423	0.9423	0	0.2018	0.2018
Ireland	IRL	2009	0.001178	1.2513	1.25248	0.001178	0.309	0.310178
Ireland	IRL	2010	0.001323	1.3904	1.39172	0.000145	0.1391	0.139245
Ireland	IRL	2011	0.001506	1.5846	1.58611	0.000183	0.1942	0.194383
Ireland	IRL	2012	0.001795	1.70435	1.70615	0.000289	0.11975	0.120039
Ireland	IRL	2013	0.002111	1.9233	1.92541	0.000316	0.21895	0.219266
Ireland	IRL	2014	0.003122	2.28325	2.28637	0.001011	0.35995	0.360961
Ireland	IRL	2015	0.005059	2.45115	2.45621	0.001937	0.1679	0.169837
Ireland	IRL	2016	0.01219	2.80165	2.81384	0.007131	0.3505	0.357631
Ireland	IRL	2017	0.030296	3.31915	3.34945	0.018106	0.5175	0.535606
Ireland	IRL	2018	0.055978	3.67385	3.72983	0.025682	0.3547	0.380382
Ireland	IRL	2019	0.102196	4.12645	4.22865	0.046218	0.4526	0.498818
Ireland	IRL	2020	0.162785	4.3067	4.46949	0.060589	0.18025	0.240839
Ireland	IRL	2021	0.247223	4.33904	4.58626	0.084438	0.032341	0.116779
Ireland	IRL	2022	0.34458	4.53613	4.88071	0.097357	0.19709	0.294447
Ireland	IRL	2023	0.888176	4.73925	5.62743	0.543596	0.20312	0.746716
Ireland	IRL	2024	1.34033	4.94195	6.28228	0.45215	0.2027	0.65485
Israel	ISR	2002	0	0.006	0.006
Israel	ISR	2003	0	0.006	0.006	0	0	0
Israel	ISR	2004	0	0.006	0.006	0	0	0
Israel	ISR	2005	0.001	0.006	0.007	0.001	0	0.001
Israel	ISR	2006	0.0013	0.006	0.0073	0.0003	0	0.0003
Israel	ISR	2007	0.0018	0.006	0.0078	0.0005	0	0.0005
Israel	ISR	2008	0.009	0.006	0.015	0.0072	0	0.0072
Israel	ISR	2009	0.0306	0.006	0.0366	0.0216	0	0.0216
Israel	ISR	2010	0.076	0.006	0.082	0.0454	0	0.0454
Israel	ISR	2011	0.1958	0.006	0.2018	0.1198	0	0.1198
Israel	ISR	2012	0.2861	0.006	0.2921	0.0903	0	0.0903
Israel	ISR	2013	0.4461	0.006	0.4521	0.16	0	0.16
Israel	ISR	2014	0.6561	0.006	0.6621	0.21	0	0.21
Israel	ISR	2015	0.7961	0.006	0.8021	0.14	0	0.14
Israel	ISR	2016	0.9061	0.02725	0.93335	0.11	0.02125	0.13125
Israel	ISR	2017	1.0061	0.02725	1.03335	0.0999999	0	0.0999999
Israel	ISR	2018	1.3461	0.02725	1.37335	0.34	0	0.34
Israel	ISR	2019	2.1381	0.02725	2.16535	0.792	0	0.792
Israel	ISR	2020	2.652	0.02725	2.67925	0.5139	0	0.5139
Israel	ISR	2021	3.591	0.02725	3.61825	0.939	0	0.939
Israel	ISR	2022	4.632	0.13625	4.76825	1.041	0.109	1.15
Israel	ISR	2023	5.516	0.34325	5.85925	0.884	0.207	1.091
Israel	ISR	2024	5.6054	0.34325	5.94865	0.0894	0	0.0894
Italy	ITA	2000	0.019	0.363	0.382
Italy	ITA	2001	0.02	0.664	0.684	0.001	0.301	0.302
Italy	ITA	2002	0.022	0.78	0.802	0.002	0.116	0.118
Italy	ITA	2003	0.026	0.874	0.9	0.004	0.094	0.098
Italy	ITA	2004	0.031	1.127	1.158	0.005	0.253	0.258
Italy	ITA	2005	0.034	1.635	1.669	0.003	0.508	0.511
Italy	ITA	2006	0.045	1.902	1.947	0.011	0.267	0.278
Italy	ITA	2007	0.11	2.702	2.812	0.065	0.8	0.865
Italy	ITA	2008	0.483	3.525	4.008	0.373	0.823	1.196
Italy	ITA	2009	1.264	4.879	6.143	0.781	1.354	2.135
Italy	ITA	2010	3.59672	5.794	9.39072	2.33272	0.915	3.24772
Italy	ITA	2011	13.0417	6.918	19.9597	9.445	1.124	10.569
Italy	ITA	2012	16.6587	8.102	24.7607	3.617	1.184	4.801
Italy	ITA	2013	18.0317	8.542	26.5737	1.373	0.44	1.813
Italy	ITA	2014	18.4407	8.683	27.1237	0.409001	0.141	0.550001
Italy	ITA	2015	18.7417	9.137	27.8787	0.300998	0.454	0.754998
Italy	ITA	2016	19.1157	9.384	28.4997	0.374	0.247	0.621
Italy	ITA	2017	19.504	9.73658	29.2406	0.38829	0.352578	0.740868
Italy	ITA	2018	19.9163	10.2302	30.1466	0.412305	0.493669	0.905974
Italy	ITA	2019	20.625	10.6795	31.3045	0.708677	0.449213	1.15789
Italy	ITA	2020	21.3588	10.8706	32.2294	0.733767	0.191162	0.924929
Italy	ITA	2021	22.286	11.2537	33.5397	0.927216	0.383112	1.31033
Italy	ITA	2022	24.56	11.8205	36.3805	2.27399	0.566774	2.84077
Italy	ITA	2023	29.3561	12.3073	41.6634	4.79615	0.486792	5.28294
Italy	ITA	2024	36.0131	12.9923	49.0054	6.657	0.685	7.342
Jamaica	JAM	2001	0.0001	0	0.0001
Jamaica	JAM	2002	0.0001	0	0.0001	0	0	0
Jamaica	JAM	2003	0.0001	0	0.0001	0	0	0
Jamaica	JAM	2004	0.0002	0.0207	0.0209	0.0001	0.0207	0.0208
Jamaica	JAM	2005	0.0002	0.0207	0.0209	0	0	0
Jamaica	JAM	2006	0.0002	0.0207	0.0209	0	0	0
Jamaica	JAM	2007	0.0004	0.0207	0.0211	0.0002	0	0.0002
Jamaica	JAM	2008	0.0006	0.0207	0.0213	0.0002	0	0.0002
Jamaica	JAM	2009	0.0007	0.0207	0.0214	0.0001	0	0.0001
Jamaica	JAM	2010	0.001	0.0419	0.0429	0.0003	0.0212	0.0215
Jamaica	JAM	2011	0.0015	0.0419	0.0434	0.0005	0	0.0005
Jamaica	JAM	2012	0.0018	0.0419	0.0437	0.0003	0	0.0003
Jamaica	JAM	2013	0.002106	0.0419	0.044006	0.000306	0	0.000306
Jamaica	JAM	2014	0.004108	0.0419	0.046008	0.002002	0	0.002002
Jamaica	JAM	2015	0.006513	0.0419	0.048413	0.002405	0	0.002405
Jamaica	JAM	2016	0.027513	0.102	0.129513	0.021	0.0601	0.0811
Jamaica	JAM	2017	0.055513	0.102	0.157513	0.028	0	0.028
Jamaica	JAM	2018	0.055513	0.102	0.157513	0	0	0
Jamaica	JAM	2019	0.107013	0.102	0.209013	0.0515	0	0.0515
Jamaica	JAM	2020	0.107013	0.102	0.209013	0	0	0
Jamaica	JAM	2021	0.108013	0.102	0.210013	0.001	0	0.001
Jamaica	JAM	2022	0.110063	0.102	0.212063	0.00205	0	0.00205
Jamaica	JAM	2023	0.113063	0.102	0.215063	0.003	0	0.003
Jamaica	JAM	2024	0.116573	0.102	0.218573	0.00351	0	0.00351
Japan	JPN	2000	0.33	0.084	0.414
Japan	JPN	2001	0.453	0.175	0.628	0.123	0.091	0.214
Japan	JPN	2002	0.637	0.277	0.914	0.184	0.102	0.286
Japan	JPN	2003	0.86	0.508	1.368	0.223	0.231	0.454
Japan	JPN	2004	1.132	0.769	1.901	0.272	0.261	0.533
Japan	JPN	2005	1.422	1.227	2.649	0.29	0.458	0.748
Japan	JPN	2006	1.708	1.805	3.513	0.286	0.578	0.864
Japan	JPN	2007	1.919	1.527	3.446	0.211	-0.278	-0.067
Japan	JPN	2008	2.144	1.756	3.9	0.225	0.229	0.454
Japan	JPN	2009	2.627	1.997	4.624	0.483	0.241	0.724
Japan	JPN	2010	3.618	2.294	5.912	0.991	0.297	1.288
Japan	JPN	2011	4.914	2.419	7.333	1.296	0.125	1.421
Japan	JPN	2012	6.632	2.562	9.194	1.718	0.143	1.861
Japan	JPN	2013	13.599	2.646	16.245	6.967	0.084	7.051
Japan	JPN	2014	23.339	2.753	26.092	9.74	0.107	9.847
Japan	JPN	2015	34.15	2.809	36.959	10.811	0.056	10.867
Japan	JPN	2016	42.04	3.205	45.245	7.89	0.396	8.286
Japan	JPN	2017	49.4996	3.48293	52.9826	7.45963	0.277932	7.73756
Japan	JPN	2018	56.1616	3.49761	59.6592	6.662	0.014682	6.67668
Japan	JPN	2019	63.192	3.95127	67.1433	7.03037	0.453657	7.48403
Japan	JPN	2020	71.868	4.11912	75.9871	8.676	0.16785	8.84385
Japan	JPN	2021	78.413	4.26169	82.6747	6.545	0.142565	6.68756
Japan	JPN	2022	83.057	4.48348	87.5405	4.644	0.221791	4.86579
Japan	JPN	2023	87.068	5.36903	92.437	4.011	0.885554	4.89655
Japan	JPN	2024	89.6013	5.85803	95.4594	2.53333	0.489	3.02233
Jordan	JOR	2000	1.5e-05	0.0014	0.001415
[truncated: 2,274 more rows]

## Sheet: 04_GlobalCapacity
04 — Global IRENA capacity by technology, 2000-2024
IRENA aggregate by technology, in GW. Source: OWID grapher 'installed-global-renewable-energy-capacity-by-technology'.
year	All renewables (total)	Bioenergy (total)	Biogas	Concentrated solar power	Geothermal	Hydropower	Hydropower (total)	Liquid biofuels	Marine	Mixed hydro plants	Offshore wind	Onshore wind	Pumped storage	Renewable municipal waste	Solar (total)	Solar photovoltaic	Solar photovoltaic (off-grid)	Solid biofuels	Wind (total)
2000	764.382	31.1082	2.51952	0.419	8.2727	664.017	787.42	0.00271	0.23825	41.9162	0.06695	16.8813	80.8385	3.52233	1.22014	0.755697	0.04544	23.4464	16.9609
2001	785.528	33.5356	2.85109	0.246	7.9607	670.098	796.229	0.00771	0.24025	47.7362	0.07595	23.8724	77.7225	3.69008	1.33076	1.02279	0.061975	25.3589	23.9545
2002	806.422	35.4915	3.1153	0.202	8.1132	681.193	809.357	0.01101	0.24325	48.3612	0.23995	30.4744	79.1376	3.78124	1.63056	1.34102	0.087536	26.9592	30.7232
2003	836.679	38.3706	3.54786	0.3884	8.1881	700.103	828.172	0.06601	0.24425	48.0912	0.51055	38.143	79.2976	4.18173	2.34183	1.84746	0.105968	28.948	38.6597
2004	869.536	40.7444	3.84326	0.3884	8.2088	719.467	849.677	0.63401	0.24325	49.0992	0.59575	47.0575	80.4235	4.30344	3.42625	2.9153	0.122548	30.3	47.6601
2005	908.759	45.437	4.90061	0.3884	8.55582	738.893	874.407	0.80345	0.24125	51.4127	0.68575	57.7703	83.2665	4.58226	4.92218	4.39034	0.143436	33.0941	58.4629
2006	950.292	49.7106	5.48581	0.4124	8.75872	759.194	897.914	0.929387	0.24025	51.8347	0.88375	72.2528	85.9605	4.9452	6.48561	5.91162	0.161589	36.2351	73.1434
2007	999.74	52.7101	6.29243	0.479	9.01274	784.494	927.443	1.03622	0.24255	51.8717	1.09425	90.4116	90.1395	4.88655	8.95567	8.26591	0.210763	38.2894	91.5164
2008	1062.88	56.139	6.77116	0.535	9.31902	813.094	958.403	1.21548	0.24555	52.3686	1.44245	114.02	91.9265	5.09623	15.2289	14.4449	0.249053	40.6115	115.475
2009	1144.02	63.9312	8.43947	0.7651	9.75442	842.84	992.992	1.69972	0.24455	52.5736	2.13355	147.957	96.55	5.37558	23.5442	22.4834	0.2957	45.3801	150.105
2010	1226.91	68.2219	9.61423	1.26582	9.91472	872.47	1026.37	1.87337	0.2499	52.8056	3.05535	177.712	100.052	6.6748	41.3715	39.7328	0.372886	46.8662	180.841
2011	1331.62	74.4457	11.5125	1.70432	10.0585	900.114	1057.54	1.90888	0.24793	53.0943	3.78661	216.246	103.273	7.00815	72.4209	70.1893	0.527281	50.6305	220.178
2012	1445.93	78.3939	13.1924	2.56652	10.5176	933.259	1093.14	2.06834	0.254659	53.4398	5.34475	261.361	105.605	7.48499	102.294	99.0172	0.71022	52.2092	266.938
2013	1569.87	85.0436	14.0266	3.94158	10.7864	980.062	1142.49	2.04314	0.509966	53.7082	7.18205	292.277	107.729	8.59763	139.004	134.04	1.02229	56.9173	299.759
2014	1696.35	89.9098	15.0904	4.59908	11.2444	1012.88	1176.6	2.32511	0.512777	53.6963	8.50257	340.64	109.471	8.80886	178.058	172.169	1.29005	59.6615	349.494
2015	1849.07	95.553	15.8032	4.85019	11.8435	1044.31	1210.96	2.39571	0.513288	54.1615	11.7329	404.246	111.902	9.73752	225.719	219.262	1.60715	63.3187	416.385
2016	2017.39	103.987	16.5217	4.97019	12.1694	1079.03	1252.99	2.32227	0.523908	56.3614	14.3773	452.487	116.995	10.5428	297.397	290.561	1.86609	70.1769	467.316
2017	2183.98	109.762	17.3608	5.07016	12.754	1096.41	1274.3	2.35712	0.526872	57.4227	18.8049	495.687	119.843	11.4568	391.502	384.045	2.38622	74.7586	514.978
2018	2354.05	116.86	18.3643	5.81098	13.1965	1114.51	1293.78	2.48832	0.526854	57.3325	23.5596	539.445	120.366	12.6298	486.528	477.687	3.03095	79.3387	563.521
2019	2538.22	122.644	19.1868	6.36813	13.8238	1130.52	1310.08	3.38706	0.524834	57.3535	28.2633	594.237	120.613	14.1252	588.691	578.978	3.34484	82.1089	623.067
2020	2808.1	130.658	19.7813	6.40583	14.1648	1150.84	1332.08	3.29577	0.491136	57.3179	34.34	698.423	122.319	15.9338	719.664	709.093	4.16567	87.3159	733.362
2021	3072.57	137.297	20.0097	6.3662	14.451	1173.69	1360.12	2.81912	0.490563	57.7324	54.2684	769.389	127.083	18.8512	862.991	851.793	4.83111	90.8738	824.308
2022	3375.1	143.565	20.4032	6.56409	14.6956	1195.73	1393.48	2.84264	0.492141	59.6135	62.6271	839.699	136.513	20.1809	1056.37	1044.31	5.49752	94.5623	903.008
2023	3860.9	146.192	20.7795	6.86409	15.0915	1206.44	1409.12	2.2408	0.492091	59.2424	74.2552	943.382	141.811	21.291	1413.47	1400.62	5.98687	96.0985	1018.35
2024	4442.76	151.264	20.9419	7.58109	15.4116	1215.52	1426.7	2.2468	0.493687	59.3944	82.8794	1049.04	150.074	22.3248	1866.31	1852.36	6.36652	99.5978	1132.66

## Sheet: 05_MonthlyPanel
05 — Master monthly panel 2000-01 to 2026-04
316 monthly observations × 40 columns (full panel): date, Brent (USD/bbl), GPR (Caldara-Iacoviello), commodity prices (copper, nickel, iron ore, aluminum in USD/t), global renewables generation (TWh) by source, plus log transforms. All 40 columns shown.
date	brent	GPR	GPRT	GPRA	GPRC_USA	GPRC_RUS	GPRC_CHN	GPRC_SAU	GPRC_DEU	GPRC_GBR	GPRC_FRA	GPRC_JPN	GPRC_KOR	GPRC_IND	GPRC_BRA	GPRC_TUR	GPRC_UKR	copper_usd_t	nickel_usd_t	iron_ore_usd_dmtu	aluminum_usd_t	global_solar_twh	global_wind_twh	global_renewables_twh	global_hydro_twh	global_bioenergy_twh	global_coal_twh	global_gas_twh	global_nuclear_twh	global_other_fossil_twh	global_other_renewables_twh	global_clean_twh	global_fossil_twh	global_total_generation_twh	log_brent	log_gpr	log_copper	global_renew_twh	log_renew
2000-01-01	25.51	64.4578	65.5736	64.2504	1.19897	0.731371	0.266771	0.0629459	0.113902	0.692405	0.308734	0.0809304	0.0839278	0.251783	0.0299742	0.0479588	0.0299742	1843.98	8309.5	28.79	1680.28	0	0	0.71	0.69	0.02	18.72	2.15	3.56	2.32	0	4.27	23.19	27.46	3.23907	4.16601	7.51968	0
2000-02-01	27.78	63.5417	57.6514	68.0822	1.23213	0.534126	0.209402	0.0485569	0.169949	0.731389	0.342933	0.0667658	0.0910443	0.145671	0.0242785	0.0485569	0.0121392	1800.83	9653.33	28.79	1670.27	0	0	0.99	0.97	0.02	17.41	2.09	3.16	2.4	0	4.15	21.9	26.05	3.32432	4.1517	7.496	0
2000-03-01	27.49	50.102	55.0307	40.8164	1.01005	0.350368	0.276462	0.0602195	0.153286	0.541976	0.246353	0.1396	0.0821175	0.208031	0.0191608	0.0301098	0.0164235	1739.39	10280.1	28.79	1577.05	0	0	1.08	1.05	0.03	19.6	2.16	3.13	2.78	0	4.21	24.54	28.75	3.31382	3.91406	7.46129	0
2000-04-01	22.76	48.6827	53.3049	40.917	1.03142	0.440753	0.206884	0.0329815	0.125929	0.530703	0.218877	0.0899496	0.188894	0.119933	0.0269849	0.0209882	0.0269849	1678.75	9727.5	28.79	1457.14	0	0	0.83	0.8	0.03	19.2	2.01	2.64	2.63	0	3.47	23.84	27.31	3.125	3.88532	7.4258	0
2000-05-01	27.74	79.4829	77.2697	83.2278	1.39232	0.466002	0.306879	0.0426221	0.215952	0.988833	0.377916	0.105135	0.136391	0.409172	0.0170488	0.0312562	0.0227318	1785.62	10130.2	28.79	1466.79	0	0	0.96	0.94	0.02	20.89	2.32	3.09	3.15	0	4.05	26.36	30.41	3.32288	4.37554	7.48752	0
2000-06-01	29.8	64.7178	73.5747	53.1744	1.27405	0.518209	0.334975	0.0286303	0.163193	0.667087	0.21759	0.154604	0.343564	0.234769	0.0400825	0.0200412	0.0229043	1753.18	8410.91	28.79	1506.31	0	0	1.13	1.1	0.03	21.55	2.53	3.61	2.99	0	4.74	27.07	31.81	3.39451	4.17004	7.46919	0
2000-07-01	28.68	51.904	57.317	41.0591	0.957803	0.409216	0.335083	0.0326187	0.154197	0.598998	0.219435	0.183851	0.240192	0.252053	0.0207573	0.0296534	0.0118613	1799.36	8164.41	28.79	1563.5	0	0	1.24	1.21	0.03	22.71	2.54	3.64	3.15	0	4.88	28.4	33.28	3.3562	3.9494	7.49519	0
2000-08-01	30.2	46.4923	49.1923	41.5859	0.820109	0.337518	0.186523	0.0532923	0.133231	0.595097	0.225012	0.0888205	0.106585	0.210208	0.0266461	0.0296068	0.00888205	1855.86	8006.71	28.79	1527.63	0	0	1.25	1.23	0.02	22.25	2.36	3.49	3.19	0	4.74	27.8	32.54	3.40784	3.83929	7.5261	0
2000-09-01	33.14	52.69	64.445	35.1921	1.10486	0.363626	0.279712	0.0783195	0.148248	0.581802	0.358032	0.0923051	0.128668	0.137059	0.0363626	0.0391597	0.00839137	1960.41	8637.98	28.79	1601.21	0	0	1.17	1.14	0.03	20.84	2.15	2.92	2.67	0	4.09	25.66	29.75	3.50074	3.96443	7.58091	0
2000-10-01	30.96	76.4565	82.3876	77.6101	1.71029	0.448196	0.181478	0.291465	0.17048	0.794655	0.360207	0.0934888	0.145733	0.118236	0.024747	0.115486	0.016498	1898.59	7678.07	28.79	1500.24	0	0	0.95	0.92	0.03	21.05	2.5	3.04	2.91	0	3.99	26.46	30.45	3.4327	4.33672	7.54887	0
2000-11-01	32.55	45.0606	44.3577	47.2068	0.951083	0.286437	0.161295	0.105676	0.100114	0.511694	0.244723	0.108457	0.0973331	0.105676	0.0222476	0.0806474	0.0111238	1795.11	7339.77	28.79	1473.86	0	0	0.8	0.78	0.02	20.26	2.18	2.77	2.46	0	3.57	24.9	28.47	3.48278	3.80801	7.49282	0
2000-12-01	25.66	45.3951	46.169	43.9834	0.981815	0.324184	0.175986	0.114236	0.098799	0.435333	0.169811	0.0586619	0.111149	0.160548	0.0185248	0.0771867	0.0277872	1850.55	7314.34	28.79	1565.41	0	0	0.68	0.66	0.02	20.56	2.12	3.46	1.97	0	4.14	24.65	28.79	3.24493	3.8154	7.52324	0
2001-01-01	25.62	46.8996	53.7024	38.3433	1.02463	0.387855	0.257605	0.0665721	0.0868332	0.558627	0.2605	0.0781499	0.115778	0.147616	0.0347333	0.0578888	0.02605	1787.5	6994.77	30.03	1615.65	0	0.39	25.21	19.08	4.42	197.21	44.5	72.26	20.93	1.32	97.47	262.64	360.11	3.24337	3.84801	7.48857	0.39	-0.941609
2001-02-01	27.5	55.0877	63.6899	45.4267	1.17208	0.435978	0.312767	0.154804	0.145326	0.890911	0.360155	0.097937	0.120052	0.173759	0.0410704	0.139007	0.0315926	1765.65	6524.13	30.03	1604.36	0	0.43	23.01	17.59	3.82	168.87	40.22	64.16	13.19	1.17	87.17	222.28	309.45	3.31419	4.00893	7.47627	0.43	-0.84397
2001-03-01	24.5	61.709	66.7222	56.867	1.19103	0.347726	0.257372	0.065712	0.169756	0.714618	0.284752	0.15059	0.213564	0.101306	0.008214	0.10952	0.049284	1738.77	6133.52	30.03	1509.17	0	0.53	26.39	20.51	4.07	176.22	47.05	64.78	15.16	1.28	91.17	238.43	329.6	3.19867	4.12243	7.46093	0.53	-0.634878
2001-04-01	25.66	50.5687	52.7737	47.1722	1.13681	0.280433	0.401049	0.0452311	0.117601	0.404065	0.205048	0.123632	0.0995085	0.0934777	0.0331695	0.0211079	0.015077	1664.16	6329.87	30.03	1496.91	0	0.68	23.94	18.02	4.04	161.35	48.44	57.6	14.54	1.2	81.54	224.33	305.87	3.24493	3.92333	7.41708	0.68	-0.385662
2001-05-01	28.31	60.3769	61.345	56.8642	1.27563	0.506834	0.333144	0.0512528	0.193622	0.683371	0.29328	0.122437	0.199317	0.11959	0.022779	0.105353	0.0199317	1682.21	7060.83	30.03	1538.77	0	0.64	25.52	19.74	3.98	173.78	53.26	64.03	14.04	1.16	89.55	241.08	330.63	3.34322	4.10061	7.42786	0.64	-0.446287
2001-06-01	27.85	72.0643	79.3131	64.2145	1.51244	0.452543	0.285816	0.160772	0.232226	0.824699	0.375134	0.107181	0.193521	0.122067	0.0267953	0.0863404	0.035727	1608.45	6641.19	30.03	1466.13	0	0.67	27.16	21.17	4.15	184.68	60.3	71.52	14.91	1.17	98.68	259.89	358.57	3.32683	4.27756	7.38303	0.67	-0.400478
2001-07-01	24.61	61.0729	65.4928	52.6188	1.3174	0.514413	0.31053	0.05646	0.238386	0.699476	0.29171	0.175653	0.128603	0.166243	0.01882	0.0595966	0.01882	1525.21	5937.05	30.03	1416.39	0	0.63	24.59	18.32	4.37	202.63	75.97	72.44	14.78	1.27	97.03	293.38	390.41	3.20315	4.11207	7.32989	0.63	-0.462035
2001-08-01	25.68	64.1077	55.2321	74.8922	1.34941	0.333458	0.21815	0.0592122	0.171404	0.729245	0.239965	0.0623286	0.112191	0.118424	0.0249314	0.0623286	0.0373972	1464.43	5520.8	30.03	1377.08	0	0.58	25.32	19.01	4.48	206.55	81.62	72.06	18.23	1.25	97.38	306.4	403.78	3.24571	4.16057	7.28922	0.58	-0.544727
2001-09-01	25.62	498.648	260.17	841.177	13.229	1.69726	0.770388	1.43846	1.55281	5.99458	1.75444	1.23683	0.451399	0.94192	0.210653	0.346073	0.027084	1426.33	5027	30.03	1344.56	0	0.49	21.08	15.26	4.09	175.57	62.47	66.21	10.57	1.24	87.29	248.61	335.9	3.24337	6.2119	7.26286	0.49	-0.71335
2001-10-01	20.54	512.53	261.347	854.075	13.1002	1.81748	0.659147	1.07008	1.21349	5.90198	1.42585	0.910119	0.273036	0.945972	0.124107	0.325436	0.115833	1377.28	4825.33	30.03	1282.5	0	0.61	21.85	15.68	4.29	169.83	58.98	63.5	9.78	1.27	85.35	238.59	323.94	3.02237	6.23936	7.22787	0.61	-0.494296
2001-11-01	18.8	306.786	149.795	509.746	7.89007	1.37851	0.360622	0.552567	0.849208	2.80936	0.968446	0.520576	0.23266	0.572924	0.11633	0.340265	0.023266	1427.73	5078.41	30.03	1327.46	0	0.47	21.19	15.35	4.1	164.84	46.63	65.36	8.67	1.27	86.55	220.14	306.69	2.93386	5.72615	7.26384	0.47	-0.755023
2001-12-01	18.71	236.1	126.198	381.973	6.04755	0.899952	0.389341	0.382958	0.523376	2.15414	0.689325	0.382958	0.232966	0.737195	0.0765917	0.19467	0.0255306	1471.74	5263.82	30.03	1344.63	0	0.62	25.61	19.43	4.27	178.52	50.16	70.39	8.79	1.29	96	237.47	333.47	2.92906	5.46425	7.2942	0.62	-0.478036
2002-01-01	19.42	172.477	106.916	262.287	4.23239	0.459777	0.341027	0.237501	0.37452	1.6351	0.587662	0.347117	0.182693	0.806894	0.0608976	0.13093	0.0213142	1503.96	6043.18	29.31	1368.59	0	0.81	28.4	21.65	4.53	185.21	50.62	74.54	8.98	1.41	102.94	244.81	347.75	2.9663	5.15027	7.31586	0.81	-0.210721
2002-02-01	20.28	146.186	95.7803	212.906	3.62198	0.521013	0.373497	0.285616	0.364081	1.45633	0.448825	0.295032	0.52729	0.317002	0.0784658	0.141239	0.0125545	1561.9	6029.25	29.31	1369.34	0	0.71	26.2	20.29	3.97	161.88	46.27	64.92	7.42	1.23	91.12	215.57	306.69	3.00964	4.98488	7.35366	0.71	-0.34249
2002-03-01	23.7	151.976	99.1233	219.969	3.86331	0.602375	0.283811	0.535766	0.373588	1.48566	0.489429	0.165074	0.324356	0.217202	0.0550246	0.147698	0.0202722	1604.88	6537.5	29.31	1405	0	0.85	27.38	20.9	4.25	173.3	53.83	66.3	10.49	1.38	93.68	237.62	331.3	3.16548	5.02373	7.3808	0.85	-0.162519
2002-04-01	25.73	157.497	100.744	225.64	3.84049	0.53681	0.168712	0.567485	0.383436	1.59509	0.533742	0.187117	0.165644	0.193252	0.0398773	0.134969	0.0184049	1590.33	6958.21	29.31	1369.99	0	1.02	30.72	24.08	4.39	163.72	52.31	61.37	10.54	1.23	92.09	226.57	318.66	3.24766	5.0594	7.3717	1.02	0.0198026
2002-05-01	25.35	163.322	142.247	209.409	4.08916	0.842237	0.276777	0.252969	0.425583	1.71721	0.586292	0.285706	0.226184	0.705336	0.0327371	0.086307	0.00892831	1595.68	6761.36	29.31	1343.3	0	1.08	33.56	26.7	4.44	174.63	53.63	66.09	10.97	1.34	99.65	239.23	338.88	3.23278	5.09573	7.37506	1.08	0.076961
2002-06-01	24.08	149.33	127.791	189.123	3.67388	0.718737	0.225184	0.265285	0.394842	1.50225	0.570671	0.354741	0.154235	0.900734	0.0339318	0.0771177	0.0123388	1647.53	7119.86	29.31	1353.97	0	1.13	35.15	28.01	4.72	188.11	68.97	69.82	10.77	1.29	104.97	267.85	372.82	3.18138	5.00616	7.40703	1.13	0.122218
2002-07-01	25.74	122.778	94.3497	168.42	2.95431	0.379975	0.177322	0.170989	0.281815	1.21275	0.487635	0.221652	0.189988	0.329312	0.0284981	0.139324	0.0221652	1589.46	7142.72	29.31	1338.09	0	0.89	32.57	25.43	4.86	207.9	87.79	74.13	13.28	1.39	106.7	308.97	415.67	3.24805	4.81038	7.37115	0.89	-0.116534
2002-08-01	26.65	127.065	101.696	157.464	3.13024	0.548599	0.258164	0.377566	0.322706	1.30696	0.367884	0.21944	0.235575	0.267846	0.058087	0.177488	0.0193623	1479.55	6717.14	29.31	1291.6	0	0.98	28.09	20.91	4.8	204.61	88.18	74.51	12.91	1.4	102.6	305.7	408.3	3.28279	4.84469	7.29949	0.98	-0.0202027
2002-09-01	28.4	174.903	174.531	188.719	4.38602	1.04122	0.509859	0.519074	0.589717	2.34351	1.02893	0.387002	0.224215	0.245715	0.0706432	0.23343	0.0675717	1478.71	6640.24	29.31	1301.25	0	0.74	23.82	17.09	4.63	188.24	71.3	67.7	10.74	1.36	91.52	270.28	361.8	3.34639	5.16423	7.29893	0.74	-0.301105
2002-10-01	27.54	172.032	167.026	197.399	4.15651	1.2136	0.594187	0.271869	0.41481	1.96474	1.1099	0.552146	0.571765	0.280277	0.0980969	0.190588	0.0280277	1483.76	6804.46	29.31	1310.58	0	0.73	24.01	17.3	4.59	181.62	57.34	63.78	11.07	1.39	87.79	250.03	337.82	3.31564	5.14768	7.30233	0.73	-0.314711
2002-11-01	24.34	159.128	155.014	179.063	3.69748	0.951623	0.362383	0.335867	0.438984	1.90325	0.854399	0.31819	0.371221	0.194449	0.0176772	0.215073	0.058924	1582.29	7313.93	29.31	1372.2	0	0.66	26	19.6	4.41	177.87	47.93	64.6	9.14	1.33	90.6	234.94	325.54	3.19212	5.06971	7.36663	0.66	-0.415515
2002-12-01	28.33	175.812	183	175.198	4.32875	0.902891	0.483463	0.342586	0.47706	2.05552	0.784427	0.627541	0.842058	0.304165	0.0832453	0.313771	0.0288157	1595.68	7193.16	29.31	1375.07	0	0.76	28.22	21.56	4.53	194.66	48.87	71.86	10.9	1.37	100.08	254.43	354.51	3.34392	5.16941	7.37506	0.76	-0.274437
2003-01-01	31.18	206.435	245.818	176.96	4.9683	1.155	0.818623	0.422707	0.827553	2.7476	1.29491	0.762064	1.24133	0.285774	0.0982348	0.428661	0.0416753	1647.66	8026.02	31.95	1378.28	0.01	0.63	27.35	20.62	4.63	203.75	52.72	72.88	15.17	1.46	100.23	271.64	371.87	3.43978	5.32998	7.40711	0.64	-0.446287
2003-02-01	32.77	239.611	296.76	213.08	5.82416	1.33397	0.944631	0.373384	1.29248	3.59981	1.73289	0.753151	1.0308	0.245732	0.079783	0.62869	0.0319132	1683.8	8623	31.95	1422.16	0.02	0.75	25.97	19.78	4.11	177.31	45.61	64.24	13.21	1.31	90.21	236.13	326.34	3.48951	5.47902	7.42881	0.77	-0.261365
2003-03-01	30.61	358.711	362.411	429.144	9.00474	1.69618	0.806519	0.748316	1.59364	5.55971	2.35581	0.814833	0.873036	0.327042	0.0443447	1.20008	0.0277154	1658.98	8378.81	31.95	1389.27	0.05	1.04	31.16	24.18	4.46	177.89	49.48	63	12.96	1.43	94.16	240.33	334.49	3.42133	5.88252	7.41396	1.09	0.0861777
2003-04-01	25	255.775	212.605	331.603	6.58738	1.16299	0.889005	0.422642	0.979363	3.62015	1.34662	0.655824	0.810307	0.209864	0.0816136	0.638335	0.0437216	1587.47	7910.12	31.95	1332.01	0.06	1.09	31.79	24.86	4.38	164.6	47.95	59.54	11.44	1.4	91.33	223.99	315.32	3.21888	5.5443	7.3699	1.15	0.139762
2003-05-01	25.86	162.122	153.396	186.846	4.00034	0.925133	0.465422	0.676718	0.511107	2.00731	0.839472	0.305522	0.44829	0.285535	0.0456856	0.174176	0.0199874	1648.28	8330.62	31.95	1398.49	0.07	1.01	36.28	29.57	4.26	174.51	52.58	65.01	11.12	1.37	101.29	238.21	339.5	3.2527	5.08835	7.40748	1.08	0.076961
2003-06-01	27.65	145.77	127.834	176.918	3.54958	0.599632	0.451984	0.256124	0.409799	1.7085	0.750294	0.394733	0.557447	0.238045	0.0542381	0.153675	0.039172	1686.5	8874.76	31.95	1409.85	0.09	1.05	35.64	28.73	4.35	186.54	57.6	67.54	13.2	1.42	103.18	257.34	360.52	3.31963	4.98203	7.43041	1.14	0.131028
2003-07-01	28.35	134.899	108.393	167.449	3.41115	0.352772	0.386515	0.266879	0.230068	1.4571	0.444799	0.377312	0.46934	0.282217	0.0552164	0.125771	0.0184055	1710	8797.39	31.95	1436.09	0.06	0.95	32.38	25.13	4.8	207.79	80.95	73.31	15.83	1.44	105.69	304.57	410.26	3.34463	4.90453	7.44425	1.01	0.00995033
2003-08-01	29.89	138.231	109.649	180	3.35664	0.646465	0.40404	0.257964	0.332556	1.46698	0.550117	0.413364	0.4662	0.276612	0.0621601	0.164724	0.03108	1760.28	9351.38	31.95	1456.31	0.06	0.82	30.21	23.19	4.72	210.57	87.12	72.73	16.18	1.42	102.94	313.87	416.81	3.39752	4.92893	7.47323	0.88	-0.127833
2003-09-01	27.11	118.196	99.7205	143.557	2.81848	0.514857	0.297146	0.155928	0.458959	1.36511	0.632539	0.264784	0.370697	0.308914	0.0411886	0.179465	0.00588408	1789.52	9965.34	31.95	1415.57	0.06	0.9	25.51	18.74	4.41	188.8	62.4	66.63	12.27	1.4	92.14	263.47	355.61	3.2999	4.77235	7.4897	0.96	-0.040822
2003-10-01	29.61	108.317	93.0283	129.943	2.64492	0.555406	0.353195	0.18873	0.401726	1.09733	0.493394	0.318145	0.420599	0.212995	0.0350499	0.180642	0.0458345	1920.54	11047.2	31.95	1474.25	0.04	0.9	25.52	18.76	4.45	183.25	54.76	63.29	11.26	1.37	88.81	249.27	338.08	3.38811	4.68507	7.56036	0.94	-0.0618754
2003-11-01	28.75	118.087	93.3316	153.246	2.87081	0.39421	0.285878	0.297915	0.445367	1.48656	0.466432	0.328007	0.285878	0.192591	0.0421293	0.505552	0.0210647	2055.43	12086.5	31.95	1508.34	0.01	0.96	26.52	19.77	4.43	180.91	48.2	62.56	9.45	1.35	89.08	238.56	327.64	3.35864	4.77142	7.62824	0.97	-0.0304592
2003-12-01	29.81	129.465	107.444	164.981	3.16004	0.493756	0.465087	0.245285	0.375892	1.30607	0.611621	0.42686	0.522426	0.251656	0.0509684	0.248471	0.0191131	2201.29	14162.5	31.95	1554.9	0	1.1	31.33	24.02	4.73	199.53	46.89	71.89	12.47	1.48	103.22	258.89	362.11	3.39484	4.86341	7.6968	1.1	0.0953102
2004-01-01	31.28	113.468	106.717	126.085	2.69343	0.331086	0.363897	0.181948	0.268448	1.29452	0.521983	0.280379	0.402673	0.319155	0.101414	0.128259	0.011931	2423.57	15326.5	37.9	1606.49	0.01	1	29.78	22.68	4.61	204.03	50.3	74.32	17.56	1.48	104.1	271.89	375.99	3.44298	4.73152	7.793	1.01	0.00995033
2004-02-01	30.86	115.076	104.115	129.244	2.81673	0.496163	0.388302	0.135597	0.298931	1.1834	0.523899	0.338993	0.551635	0.249622	0.0493081	0.151006	0.0400629	2759.53	15145.1	37.9	1685.62	0.01	1.02	27.65	20.95	4.27	184.46	52.74	67.2	11.55	1.4	94.85	248.75	343.6	3.42946	4.74559	7.92281	1.03	0.0295588
2004-03-01	33.63	138.532	109.124	183.703	3.16566	0.420372	0.323143	0.183019	0.591953	1.7587	0.777832	0.285968	0.297406	0.26023	0.0486145	0.225914	0.0343161	3008.72	13715	37.9	1655.99	0.05	1.29	30.14	22.91	4.45	178.1	53.32	66.56	12.01	1.44	96.7	243.43	340.13	3.51542	4.9311	8.00927	1.34	0.29267
2004-04-01	33.59	149.631	121.146	205.325	3.54631	0.420193	0.447014	0.32781	0.411253	1.66587	0.6288	0.509596	0.342711	0.187746	0.0745023	0.262248	0.0983431	2948.72	12848.1	37.9	1729.74	0.06	1.29	27.95	20.83	4.41	164.17	55.99	61.56	11.18	1.36	89.51	231.34	320.85	3.51423	5.00817	7.98913	1.35	0.300105
2004-05-01	37.57	121.091	91.9654	159.948	2.88095	0.322713	0.416593	0.287508	0.296309	1.22631	0.384322	0.243502	0.214164	0.190694	0.0586751	0.114416	0.011735	2733.5	11118.3	37.9	1623.22	0.08	1.7	31.58	24	4.38	181.7	66.49	68.57	12.8	1.42	100.15	260.99	361.14	3.62621	4.79654	7.91334	1.78	0.576613
2004-06-01	35.18	137.234	106.794	178.037	3.36099	0.576085	0.447734	0.561161	0.534296	1.37007	0.605934	0.325354	0.423855	0.238792	0.0507432	0.310429	0.00895469	2686.7	13533.5	37.9	1677.72	0.09	1.4	32.49	25.17	4.42	193.04	68.91	71.33	13.49	1.41	103.82	275.44	379.26	3.56048	4.92169	7.89607	1.49	0.398776
2004-07-01	38.22	131.02	121.268	159.812	3.1758	0.370962	0.307627	0.334771	0.217149	1.26067	0.422234	0.199053	0.322707	0.292548	0.0392074	0.162862	0.0241276	2808.43	15023.3	37.9	1709.27	0.08	1.16	30.74	23.27	4.77	208.15	83.92	75.66	14.95	1.46	106.4	307.02	413.42	3.64336	4.87535	7.94038	1.24	0.215111
2004-08-01	42.74	140.366	127.445	176.454	3.45016	0.538043	0.264462	0.194547	0.28878	1.40742	0.480287	0.197586	0.209746	0.14895	0.0607958	0.185427	0.0364775	2846.09	13679.5	37.9	1692.19	0.07	1.05	28.7	21.46	4.68	204.48	82.35	74.64	13.85	1.44	103.34	300.68	404.02	3.75514	4.94425	7.9537	1.12	0.113329
2004-09-01	43.2	153.872	130.206	189.355	3.50851	0.993031	0.42473	0.257231	0.385846	1.5703	0.813567	0.257231	0.418748	0.242276	0.0658032	0.215356	0.0329016	2894.86	13270.9	37.9	1723.6	0.06	1.09	27.54	20.67	4.39	188.58	71.94	69.04	11.58	1.33	96.58	272.1	368.68	3.76584	5.03612	7.97069	1.15	0.139762
2004-10-01	49.78	119.863	100.508	148.244	2.93966	0.486604	0.332036	0.140256	0.314861	1.13923	0.489466	0.24044	0.260476	0.117357	0.0658347	0.171743	0.0257614	3012.24	14404.3	37.9	1819.57	0.03	1.03	26.03	19.01	4.54	181.61	61.18	65.49	9.87	1.42	91.52	252.66	344.18	3.90761	4.78635	8.01044	1.06	0.0582689
2004-11-01	43.11	122.707	98.9267	151.679	2.97499	0.501336	0.363243	0.135091	0.564378	1.50101	0.945634	0.189127	0.255171	0.186125	0.0690463	0.156105	0.123082	3122.8	14045.5	37.9	1813.9	0.02	0.93	27.58	20.9	4.36	180.76	53.66	61.92	9.27	1.37	89.5	243.69	333.19	3.76375	4.8098	8.04648	0.95	-0.0512933
2004-12-01	39.6	109.895	81.6048	145.225	2.58487	0.381061	0.409641	0.200057	0.362008	0.990759	0.412816	0.238163	0.215935	0.234988	0.0666857	0.146073	0.1556	3145.45	13768.8	37.9	1849.18	0.01	1.17	33.28	26.06	4.62	200.62	55.12	71.74	12.28	1.42	105.02	268.02	373.04	3.67883	4.69953	8.05371	1.18	0.165514
2005-01-01	44.51	100.888	78.1986	128.535	2.4558	0.331865	0.452543	0.187051	0.280577	1.02576	0.422374	0.211187	0.229289	0.235323	0.0603391	0.0935256	0.066373	3170	14505	65	1834.42	0.01	1.14	31.51	24.28	4.64	201.41	54.45	73.56	13.56	1.44	105.07	269.42	374.49	3.79571	4.61401	8.06149	1.15	0.139762
2005-02-01	45.48	108.978	104.77	108.796	2.62201	0.524402	0.627353	0.115819	0.534054	1.20645	0.701348	0.312068	0.443973	0.173728	0.0289547	0.128688	0.109385	3253.7	15349.5	65	1882.85	0.01	0.97	28.45	22.04	4.21	177.89	47.32	64.14	8.7	1.22	92.59	233.91	326.5	3.81727	4.69115	8.08755	0.98	-0.0202027
2005-03-01	53.1	90.4105	87.2263	87.8767	2.12187	0.489663	0.529752	0.140313	0.280625	0.99937	0.529752	0.209037	0.317851	0.211901	0.0687246	0.0486799	0.120268	3379.49	16190.6	65	1979.85	0.04	1.56	30.94	23.36	4.6	188.32	55.17	64.76	9.83	1.38	95.7	253.32	349.02	3.97218	4.50436	8.12548	1.6	0.470004
2005-04-01	51.88	87.0324	72.5326	102.854	1.94238	0.264869	0.364931	0.0735749	0.244269	0.838753	0.353159	0.164808	0.203067	0.226611	0.0382589	0.0912328	0.0559169	3394.48	16141.9	65	1894.29	0.06	1.7	31.06	23.68	4.29	166.22	56.27	58.62	8.64	1.33	89.68	231.13	320.81	3.94893	4.46628	8.1299	1.76	0.565314
2005-05-01	48.65	98.206	89.9327	104.91	2.2817	0.41567	0.412679	0.0867225	0.376794	1.08553	0.619019	0.284091	0.442584	0.161483	0.0568182	0.0986842	0.041866	3249.1	16931.5	65	1743.7	0.08	1.75	35.9	28.17	4.47	179.02	59.49	66.36	8.87	1.43	102.26	247.38	349.64	3.88465	4.58707	8.08613	1.83	0.604316
2005-06-01	54.35	81.1241	69.8825	93.4175	1.93032	0.29813	0.388472	0.132502	0.25597	0.761888	0.382449	0.222845	0.271027	0.19273	0.036137	0.168639	0.036137	3524.07	16159.5	65	1731.3	0.09	1.81	35.93	28.09	4.53	200.53	80.01	69.77	12.56	1.41	105.7	293.1	398.8	3.99544	4.39598	8.16737	1.9	0.641854
2005-07-01	57.52	165.902	118.184	237.565	3.48628	0.576976	0.723509	0.192325	0.409073	3.10468	0.586134	0.451812	0.409073	0.366334	0.149586	0.265592	0.027475	3614.21	14580.7	65	1778.79	0.07	1.42	34.9	27.14	4.83	212.71	102.04	74.68	15.39	1.44	109.58	330.14	439.72	4.05213	5.1114	8.19263	1.49	0.398776
2005-08-01	63.98	116.228	92.6831	143.291	2.48592	0.411083	0.394899	0.294556	0.417557	1.69936	0.495242	0.229818	0.239529	0.213634	0.123001	0.106817	0.0226581	3797.75	14892.7	65	1867.84	0.08	1.14	30.23	22.8	4.79	214.16	105.9	75.02	16.83	1.42	105.25	336.89	442.14	4.15857	4.75555	8.24216	1.22	0.198851
2005-09-01	62.91	103.808	78.4567	130.272	2.36294	0.467331	0.49946	0.110991	0.376785	1.32313	0.411835	0.259953	0.315448	0.259953	0.0525747	0.148962	0.0350498	3857.84	14228.2	65	1839.91	0.06	1.48	25.92	18.44	4.56	196.16	78.66	69.59	14.8	1.38	95.51	289.62	385.13	4.14171	4.64254	8.25786	1.54	0.431782
2005-10-01	58.54	87.0618	73.1877	105.562	2.01379	0.38782	0.247055	0.0718184	0.24131	0.950876	0.384947	0.135019	0.149382	0.158001	0.0201092	0.0603275	0.0373456	4059.76	12402.9	65	1928.71	0.04	1.47	26.4	19.05	4.47	186.45	60.67	64.4	12.56	1.37	90.8	259.68	350.48	4.06971	4.46662	8.30888	1.51	0.41211
2005-11-01	55.24	83.4801	70.6045	96.0296	1.76584	0.347678	0.390375	0.0823447	0.253134	0.969837	0.289731	0.176889	0.186038	0.173839	0.0487969	0.0518467	0.0396474	4269.34	12115.7	65	2050.59	0.01	1.62	27.73	20.21	4.51	182.66	53.65	65.83	9.16	1.38	93.56	245.47	339.03	4.01169	4.42461	8.35921	1.63	0.48858
2005-12-01	56.86	95.3503	69.6446	130.679	2.12926	0.254006	0.21324	0.10662	0.329267	0.931356	0.35749	0.100348	0.131707	0.188153	0.0533099	0.0658534	0.0752611	4576.77	13429.2	65	2247.45	0	1.85	30.91	22.93	4.7	202.73	57.25	75.23	15.49	1.43	106.14	275.47	381.61	4.04059	4.55756	8.42875	1.85	0.615186
2006-01-01	62.99	94.51	89.3235	100.192	2.19144	0.670976	0.630963	0.113881	0.517082	1.20653	0.637119	0.129271	0.233918	0.283164	0.0492459	0.0584795	0.0892582	4734.33	14555.2	67.2	2377.86	0.01	2.4	37.11	28.44	4.84	193.98	46.79	75.57	8.64	1.42	112.68	249.41	362.09	4.14298	4.54871	8.4626	2.41	0.879627
2006-02-01	60.21	95.8582	89.4058	102.799	2.22562	0.544465	0.471233	0.162384	0.359792	1.24176	0.44576	0.152832	0.20696	0.251536	0.028656	0.0700481	0.044576	4982.4	14978.8	65.2	2455.32	0.02	1.94	33.37	25.77	4.35	181.21	49.94	65.57	7.62	1.29	98.94	238.77	337.71	4.09784	4.56287	8.51367	1.96	0.672944
2006-03-01	62.06	92.7976	88.0422	97.036	2.19225	0.582496	0.527977	0.126255	0.266858	1.03874	0.439024	0.134864	0.25825	0.350072	0.045911	0.0860832	0.0631277	5102.85	14897.4	66.7	2429.13	0.03	2.37	34.06	25.65	4.58	186.08	58.68	66.73	7.14	1.43	100.79	251.9	352.69	4.1281	4.53042	8.53755	2.4	0.875469
2006-04-01	70.26	89.0158	85.911	92.8307	2.04318	0.498261	0.538999	0.103413	0.2695	0.977719	0.357244	0.13475	0.203692	0.238162	0.043872	0.106546	0.0501394	6387.78	17942.2	67.3	2621.11	0.05	2.48	37.6	29.56	4.24	165.84	59.92	60.52	6.97	1.27	98.12	232.73	330.85	4.2522	4.48881	8.76214	2.53	0.928219
2006-05-01	69.78	85.2088	84.0331	82.2774	2.00209	0.544666	0.568607	0.0688314	0.40401	1.04444	0.484812	0.08978	0.203501	0.140655	0.0688314	0.098758	0.062846	8045.86	21077.1	67.3	2861.48	0.07	2.48	40.51	32.25	4.44	183.34	70.29	65.83	7.16	1.27	106.34	260.79	367.13	4.24535	4.4451	8.99291	2.55	0.936093
2006-06-01	68.56	102.573	90.3845	115.679	2.34217	0.58932	0.540965	0.114842	0.371725	1.26326	0.450301	0.256883	0.293149	0.226661	0.0725317	0.108797	0.0271994	7197.61	20754.5	69.3	2477.34	0.07	2.07	39.18	31.23	4.49	196.11	86.08	71.78	8.33	1.32	110.96	290.52	401.48	4.22771	4.63057	8.8815	2.14	0.760806
2006-07-01	73.67	137.135	134.396	142.086	2.97611	0.882988	0.743235	0.266802	0.428789	1.68975	0.711473	0.5876	0.711473	0.384322	0.0539957	0.184221	0.0603481	7712.1	26586.2	70.5	2512.71	0.06	1.98	35.16	26.83	4.87	215.68	113.42	75.88	9.54	1.42	111.04	338.64	449.68	4.2996	4.92096	8.95055	2.04	0.71295
2006-08-01	73.23	147.081	141.556	159.188	3.03353	0.551844	0.471165	0.132314	0.45503	2.14929	0.858424	0.164585	0.203311	0.254946	0.0451802	0.171039	0.0161358	7695.66	30743.6	69.8	2459.93	0.08	1.67	30.84	22.75	4.9	216.41	112.7	75.75	11.04	1.44	106.59	340.15	446.74	4.29361	4.99098	8.94841	1.75	0.559616
2006-09-01	61.96	111.724	110.28	114.771	2.47989	0.516012	0.491729	0.148733	0.476552	1.38109	0.525118	0.176051	0.236758	0.16998	0.0485658	0.151768	0.0121414	7602.36	30130.7	70	2472.88	0.05	1.91	25.96	18.05	4.59	187.16	77.65	69.87	6.92	1.36	95.83	271.73	367.56	4.12649	4.71603	8.93621	1.96	0.672944
2006-10-01	57.81	113.135	125.292	99.2739	2.59265	0.794761	1.08647	0.133949	0.26492	1.24721	0.520911	0.872154	1.31865	0.258967	0.056556	0.0595327	0.0267897	7500.39	32703	71.7	2654.59	0.03	2.47	26.31	17.8	4.58	186.94	75.55	60.75	7.4	1.43	87.06	269.89	356.95	4.05716	4.72858	8.92271	2.5	0.916291
2006-11-01	58.76	88.7789	87.2758	86.7105	1.96144	0.409898	0.428116	0.0971611	0.200395	1.00805	0.361318	0.242903	0.403826	0.221649	0.0273266	0.0910885	0.0364354	7029.18	32113.9	73.5	2702.8	0.02	2.57	29.48	20.93	4.57	184.16	58.01	64.58	7.1	1.39	94.06	249.27	343.33	4.07346	4.48615	8.85783	2.59	0.951658
2006-12-01	62.47	90.6066	95.7814	78.7697	2.06098	0.539627	0.412847	0.208049	0.243807	1.00124	0.390092	0.230804	0.34133	0.243807	0.0390092	0.113777	0.0455107	6675.1	34570.3	73.5	2813.63	0	2.52	30.69	21.93	4.77	198.43	60.24	74.25	6.66	1.47	104.94	265.33	370.27	4.13469	4.50653	8.80614	2.52	0.924259
2007-01-01	53.68	97.92	95.6134	97.6537	2.36875	0.330451	0.358246	0.160593	0.240889	0.917233	0.274861	0.169858	0.259419	0.14824	0.0339716	0.0710315	0.01853	5669.66	36811.1	78.2	2809.34	0.01	2.52	35.69	26.73	4.94	201.01	65.72	77.83	8.29	1.49	113.52	275.02	388.54	3.98304	4.58415	8.64288	2.53	0.928219
2007-02-01	57.56	96.1694	98.1557	90.9557	2.30363	0.590759	0.504951	0.237624	0.425743	1.0429	0.323432	0.273927	0.376238	0.211221	0.0330033	0.105611	0.0231023	5676.45	41184.2	82.66	2832.2	0.02	2.55	27.42	19.33	4.24	186.32	61.32	68.39	11.02	1.28	95.81	258.66	354.47	4.05283	4.56611	8.64408	2.57	0.943906
2007-03-01	62.05	87.3365	86.1521	83.9186	1.95455	0.390331	0.410571	0.187937	0.277569	1.09004	0.294917	0.185046	0.283352	0.144567	0.0462615	0.101197	0.0231307	6452.48	46324.8	88.55	2761.73	0.05	3.09	34.08	25.04	4.51	185.58	61.18	67.56	7.92	1.39	101.64	254.68	356.32	4.12794	4.46977	8.77222	3.14	1.14422
2007-04-01	67.49	76.6134	69.2255	83.4193	1.76912	0.285238	0.333312	0.112172	0.169861	0.830075	0.259599	0.141017	0.20191	0.134607	0.0192295	0.115377	0.0288443	7766.47	50266.8	91.26	2814.79	0.05	3.2	33.88	24.99	4.34	170.12	65.15	60.38	7.16	1.3	94.26	242.43	336.69	4.21198	4.33877	8.95757	3.25	1.17865
2007-05-01	67.21	92.5996	82.3032	103.893	1.99221	0.376379	0.324465	0.126541	0.259572	1.01557	0.301752	0.110318	0.136275	0.149254	0.0259572	0.129786	0.0162232	7681.42	52179	102.02	2792.75	0.08	2.96	35.82	27.02	4.46	183.25	72.63	68.3	7.34	1.3	104.12	263.22	367.34	4.20782	4.52828	8.94656	3.04	1.11186
2007-06-01	71.05	97.9723	87.0806	109.309	2.18094	0.500856	0.383567	0.120459	0.367717	1.07779	0.399417	0.155329	0.234578	0.209218	0.0380397	0.161669	0.0253598	7474.38	41718.6	103.21	2676.93	0.08	2.63	33.02	24.29	4.63	199.58	87.77	72.57	8.09	1.39	105.59	295.44	401.03	4.26338	4.58468	8.91924	2.71	0.996949
2007-07-01	76.93	112.346	103.263	127.135	2.39213	0.424044	0.37549	0.174797	0.239536	1.44369	0.365779	0.178034	0.34312	0.349594	0.0388438	0.161849	0.0291328	7972.57	33425.7	106.09	2732.44	0.09	2.19	32.02	23.41	4.91	213.4	104.71	76.47	8.63	1.42	108.49	326.74	435.23	4.3429	4.72159	8.98376	2.28	0.824175
2007-08-01	70.76	83.1732	73.1257	100.148	1.93608	0.326911	0.285651	0.136478	0.215825	0.917256	0.311042	0.180912	0.24439	0.145999	0.0285651	0.0983908	0.00952169	7513.5	27652.3	121.89	2515.77	0.08	2.73	29.81	20.69	4.89	217.88	127.28	76.5	9.67	1.42	106.31	354.83	461.14	4.25929	4.42093	8.92446	2.81	1.03318
2007-09-01	77.17	94.4889	94.94	92.2487	2.18031	0.497372	0.569319	0.143894	0.28466	0.93531	0.431682	0.181431	0.290916	0.225225	0.0218969	0.137638	0.0156406	7648.98	29537.5	148.65	2391.25	0.07	2.91	24.65	15.56	4.71	195.35	94.06	70.57	7.28	1.4	95.22	296.69	391.91	4.34601	4.54848	8.94233	2.98	1.09192
2007-10-01	82.34	101.473	103.61	97.4952	2.34847	0.569238	0.566378	0.108699	0.300352	0.881032	0.400469	0.165909	0.300352	0.240281	0.0715123	0.514889	0.0486284	8008.44	31055.4	168.11	2442.37	0.05	3.44	25.24	15.62	4.69	188.07	83.79	64.72	7.56	1.44	89.96	279.42	369.38	4.41086	4.61979	8.98825	3.49	1.2499
2007-11-01	92.41	89.7954	95.7385	81.5684	1.95332	0.440397	0.455376	0.188741	0.254651	0.955691	0.422421	0.140807	0.143803	0.281614	0.0329549	0.251655	0.0359507	6966.7	30610.2	195.09	2506.89	0.02	3.18	25.53	16.19	4.72	184.08	65.83	67.96	5.67	1.42	93.49	255.58	349.07	4.52624	4.49753	8.8489	3.2	1.16315
2007-12-01	90.93	94.9675	98.5314	84.1308	2.14524	0.631906	0.492563	0.155546	0.349979	1.11151	0.502285	0.129622	0.168508	0.17823	0.0421271	0.158787	0.0129622	6587.67	25991.9	190.12	2381.69	0.01	3.56	28.7	18.85	4.82	199	71.56	75.71	6.65	1.46	104.41	277.21	381.62	4.51009	4.55353	8.79295	3.57	1.27257
2008-01-01	92.18	81.4998	76.4024	83.7476	1.83726	0.286488	0.351882	0.146358	0.199296	0.691309	0.320742	0.152586	0.168156	0.230436	0.0591661	0.040482	0.003114	7061.02	27689.5	193.37	2445.52	0.02	4.37	31.65	21.11	4.77	209.06	77.05	74.55	6.79	1.38	106.2	292.9	399.1	4.52374	4.4006	8.86235	4.39	1.47933
2008-02-01	94.99	80.7515	72.5285	86.7528	1.77045	0.381425	0.286068	0.0635708	0.216141	0.705636	0.317854	0.0985347	0.10807	0.139856	0.0158927	0.193891	0.0476781	7887.69	27955.5	186.12	2776.93	0.04	3.97	29.12	19.41	4.4	190.41	63.7	68.71	5.88	1.3	97.83	259.99	357.82	4.55377	4.39138	8.97306	4.01	1.38879
2008-03-01	103.64	77.6361	72.0297	83.4844	1.63498	0.291076	0.343717	0.0990896	0.145538	0.644082	0.281786	0.0712207	0.0959931	0.133152	0.061931	0.161021	0.0371586	8439.29	31225.3	197.12	3005.29	0.07	4.86	33.39	22.35	4.63	185.99	67.68	67.99	5.85	1.48	101.38	259.52	360.9	4.64092	4.35203	9.04065	4.93	1.59534
2008-04-01	109.07	71.9048	69.458	69.9927	1.63099	0.28186	0.294528	0.0760071	0.136179	0.627059	0.221687	0.136179	0.231188	0.123512	0.0190018	0.0475044	0.0570053	8684.93	28763.2	195.95	2959.27	0.09	5.31	34.59	23.31	4.45	170.88	68.8	60.36	6.37	1.43	94.95	246.05	341	4.69199	4.27534	9.06934	5.4	1.6864
2008-05-01	122.8	72.5738	70.6777	74.7898	1.61502	0.344985	0.396886	0.204549	0.186231	0.543428	0.293085	0.094642	0.152648	0.235079	0.0396886	0.0915891	0.0274767	8382.75	25735	192.95	2902.9	0.1	5.41	39.4	28.03	4.42	181.31	68.57	68.16	5.9	1.44	107.56	255.78	363.34	4.81056	4.2846	9.03393	5.51	1.70656
2008-06-01	132.32	87.5484	88.8861	80.3449	1.85608	0.3262	0.371868	0.104384	0.339248	0.877479	0.427323	0.159838	0.234864	0.182672	0.0456681	0.104384	0.013048	8260.59	22549	183.93	2957.86	0.13	5.24	41.79	30.32	4.64	196.94	90.99	73.81	7.44	1.46	115.6	295.37	410.97	4.88522	4.47219	9.01925	5.37	1.68083
2008-07-01	132.72	89.7396	84.3225	88.1607	2.03772	0.535024	0.452459	0.0660524	0.452459	0.898312	0.55484	0.267512	0.20146	0.267512	0.0528419	0.241091	0.0330262	8414.04	20160.2	180.5	3071.24	0.11	4.13	37.1	26.38	4.96	214.49	107.14	78.09	6.82	1.52	115.19	328.45	443.64	4.88824	4.49691	9.03766	4.24	1.44456
2008-08-01	113.24	88.5541	75.7697	105.066	1.95535	1.1245	0.37372	0.0633988	0.370383	0.750776	0.654009	0.143482	0.116787	0.276953	0.0367046	0.170176	0.230238	7634.7	18927.8	178.74	2764.38	0.11	3.36	32.05	22.19	4.89	208.27	106.4	76.39	6.48	1.5	108.44	321.15	429.59	4.72951	4.48361	8.94046	3.47	1.24415
2008-09-01	97.23	88.5426	82.0143	94.461	2.03411	0.833171	0.38404	0.0488186	0.335221	0.758315	0.488186	0.156219	0.26362	0.276639	0.0716006	0.091128	0.221311	6990.86	17794.5	139.64	2525.82	0.09	3.23	26.4	17.15	4.51	186.34	84.83	70.65	6.34	1.42	97.05	277.51	374.56	4.57708	4.48348	8.85236	3.32	1.19996
2008-10-01	71.58	64.1598	53.1174	75.2827	1.38082	0.415495	0.349891	0.0937207	0.171821	0.656045	0.337395	0.149953	0.22493	0.203062	0.0281162	0.118713	0.0749766	4925.7	12139.8	88.67	2121.41	0.06	4.89	27.5	16.5	4.57	176.43	79.37	66.16	4.98	1.48	93.66	260.78	354.44	4.27082	4.16138	8.50222	4.95	1.59939
2008-11-01	52.45	79.081	68.3036	95.1436	1.76037	0.473037	0.300716	0.155426	0.185836	0.72645	0.307474	0.155426	0.152048	0.510204	0.0473037	0.0844709	0.0473037	3717	10701.5	64.95	1852.42	0.03	5.15	27.34	16.17	4.55	178.12	66.37	66.23	4.87	1.44	93.57	249.36	342.93	3.95986	4.37047	8.22067	5.18	1.64481
2008-12-01	39.95	92.3664	83.8431	109.215	1.92401	0.380327	0.290839	0.130504	0.108132	0.8315	0.350498	0.074574	0.160334	0.887431	0.0335583	0.111861	0.0708453	3071.98	9686.43	69.98	1490.43	0.02	6.79	33.98	21.2	4.51	192.26	68.52	75.94	5.89	1.46	109.92	266.67	376.59	3.68763	4.52576	8.03008	6.81	1.91839
2009-01-01	43.44	85.3695	86.3132	89.7125	1.76578	0.321366	0.248799	0.210788	0.141677	0.794775	0.414665	0.0863886	0.152044	0.345554	0.0138222	0.169322	0.0656553	3220.69	11306.9	72.51	1413.12	0.01	6.14	36.37	24.23	4.51	195.94	72.28	77.84	8.16	1.48	114.21	276.38	390.59	3.77138	4.44699	8.07735	6.15	1.81645
2009-02-01	43.32	67.4527	64.7729	64.5864	1.58318	0.364771	0.312124	0.0864922	0.184266	0.530235	0.255716	0.225632	0.297082	0.244434	0.0188026	0.0752106	0.0225632	3314.72	10408.8	75.59	1330.2	0.03	6.04	30.09	18.48	4.19	163.58	68.84	67.69	5.3	1.35	97.78	237.72	335.5	3.76861	4.21143	8.10613	6.07	1.80336
2009-03-01	46.54	72.6446	69.1771	74.833	1.63764	0.319201	0.24634	0.0832697	0.145722	0.697384	0.211644	0.190826	0.218583	0.215113	0.024287	0.0693914	0.024287	3749.75	9696.36	64.07	1335.84	0.08	7.27	35.83	22.47	4.49	160.78	75.55	70.51	5.44	1.52	106.34	241.77	348.11	3.84031	4.28558	8.22944	7.35	1.9947
2009-04-01	50.18	85.6885	84.4854	83.9813	1.99537	0.600058	0.585599	0.0975998	0.224118	0.903702	0.394014	0.365095	0.524147	0.357866	0.0397629	0.112059	0.0614517	4406.55	11166	59.78	1420.85	0.1	7.6	39.98	26.64	4.22	149.54	68.55	62.63	5.02	1.42	102.61	223.11	325.72	3.91562	4.45072	8.39085	7.7	2.04122
2009-05-01	57.3	89.6809	86.637	92.6432	2.07854	0.438723	0.39557	0.118671	0.118671	0.629315	0.244534	0.323648	0.503452	0.370397	0.0107883	0.0791139	0.0215765	4568.63	12634.7	62.69	1460.45	0.11	6.36	42.66	30.51	4.28	156.67	76.99	68.63	5.49	1.4	111.29	239.15	350.44	4.0483	4.49626	8.42697	6.47	1.86718
2009-06-01	68.61	81.1096	80.8008	74.5913	1.75973	0.462493	0.409851	0.124083	0.221846	0.691859	0.35345	0.172965	0.424892	0.236887	0.0676819	0.0526415	0.0263207	5013.95	14960.5	71.66	1573.73	0.1	5.73	42.17	30.36	4.57	173.93	93.18	73.42	5.76	1.41	115.59	272.87	388.46	4.22844	4.3958	8.51998	5.83	1.76302
2009-07-01	64.44	83.4396	82.1068	80.1209	1.92572	0.534923	0.389729	0.0993428	0.145193	0.74125	0.294208	0.206327	0.416476	0.198686	0.030567	0.0917011	0.0725967	5215.54	15984.6	83.95	1667.96	0.12	5.39	36.45	24.53	4.93	184.99	112.28	76.68	5.9	1.48	113.13	303.17	416.3	4.16573	4.42412	8.5594	5.51	1.70656
2009-08-01	72.51	73.3719	64.7092	78.0439	1.69254	0.400128	0.380122	0.0440141	0.136044	0.576184	0.224072	0.216069	0.356114	0.160051	0.028009	0.0680218	0.0320102	6165.3	19641.8	97.67	1933.75	0.12	5.99	33.42	20.83	5.02	189.26	118.95	76	6.32	1.46	109.42	314.53	423.95	4.28372	4.29554	8.72669	6.11	1.80993
2009-09-01	67.65	92.84	97.4929	77.7846	2.20418	0.876361	0.614591	0.098638	0.629766	1.14951	0.622178	0.14037	0.276945	0.193482	0.049319	0.0872567	0.0341439	6196.43	17473.2	80.71	1834.11	0.1	5.14	29.94	18.63	4.63	161.31	101.98	69.44	5.76	1.44	99.38	269.05	368.43	4.21435	4.53088	8.73173	5.24	1.65632
2009-10-01	72.77	90.5764	88.2299	90.4251	2.10511	0.583173	0.426712	0.0817865	0.252471	0.824977	0.451604	0.142237	0.177797	0.344926	0.056895	0.0711187	0.0391153	6287.98	18525.2	86.79	1878.57	0.08	7.3	34.17	20.72	4.64	164.63	81.51	61.42	5.55	1.43	95.59	251.69	347.28	4.2873	4.50619	8.74639	7.38	1.99877
2009-11-01	76.66	82.1018	74.3154	85.0098	1.73827	0.438379	0.373575	0.121984	0.236344	0.728091	0.282087	0.137232	0.217284	0.198224	0.0952998	0.0876758	0.011436	6675.6	16991.2	99.26	1949.29	0.05	7.3	35.38	21.9	4.65	161.31	72.39	61.84	4.88	1.48	97.22	238.58	335.8	4.33938	4.40796	8.80621	7.35	1.9947
2009-12-01	74.46	92.9469	89.3433	95.8714	2.20854	0.482742	0.366079	0.144823	0.22528	0.885027	0.341942	0.120685	0.193097	0.293668	0.0643656	0.108617	0.0281599	6981.71	17066.4	105.07	2180.09	0.03	7.37	39.19	25.38	4.81	191.77	79.69	74.3	5.14	1.6	113.49	276.6	390.09	4.31026	4.53203	8.85105	7.4	2.00148
2010-01-01	76.17	91.581	84.973	100.411	2.05553	0.34382	0.366002	0.214426	0.195941	1.13498	0.317942	0.166365	0.162668	0.199638	0.0628489	0.107213	0.025879	7386.25	18439.2	125.72	2235.15	0.02	7.96	79.06	63.64	5.57	205.92	88.83	83.92	8.31	1.87	162.98	303.06	466.04	4.33297	4.51722	8.90738	7.98	2.07694
2010-02-01	73.75	80.7254	78.8463	80.7117	1.80958	0.418715	0.50974	0.127435	0.265793	0.946659	0.309485	0.0837429	0.174768	0.207537	0.061897	0.160204	0.047333	6848.18	18976	127.49	2048.93	0.04	6.31	70.54	57.44	5.09	181.84	79.32	75.81	6.01	1.66	146.35	267.17	413.52	4.30068	4.39105	8.83174	6.35	1.84845
2010-03-01	78.83	74.1169	73.4969	70.0393	1.66305	0.553217	0.376731	0.112001	0.19685	0.74328	0.234184	0.122183	0.193456	0.179881	0.0950312	0.135759	0.0339397	7462.83	22461.3	139.69	2205.63	0.09	9.69	73.89	56.65	5.49	175.4	78.88	75.61	6.42	1.97	149.5	260.7	410.2	4.36729	4.30564	8.91769	9.78	2.28034
2010-04-01	84.82	88.7616	92.0569	81.2684	1.97181	0.790148	0.562358	0.0818622	0.27406	0.754556	0.266942	0.0960991	0.363041	0.281179	0.0854214	0.160165	0.0960991	7745.07	26030.8	172.47	2316.72	0.12	10.83	68.93	50.9	5.18	155.39	79.6	66.81	6.04	1.9	135.74	241.03	376.77	4.44053	4.48595	8.95481	10.95	2.39334
2010-05-01	75.95	88.9587	87.4941	85.8574	2.03357	0.559574	0.648287	0.0818889	0.272963	0.818889	0.375324	0.259315	0.477685	0.272963	0.225194	0.272963	0.0170602	6837.68	22008.2	161.35	2040.53	0.16	9.59	72.58	55.62	5.21	173.81	89.96	75.63	7.09	2	148.21	270.86	419.07	4.33008	4.48817	8.8302	9.75	2.27727
2010-06-01	74.76	96.4537	110.692	70.9886	2.11902	0.529756	0.371517	0.0756794	0.257998	0.925353	0.340557	0.120399	0.227038	0.165119	0.182319	0.743034	0.0206398	6499.3	19388.6	143.63	1931.39	0.19	8.95	76.42	59.82	5.49	196.33	108.39	77.99	7.61	1.97	154.41	312.33	466.74	4.31428	4.56906	8.77945	9.14	2.21266
2010-07-01	75.58	79.3814	75.1854	84.0482	1.62482	0.281353	0.218049	0.0879229	0.235633	0.931983	0.189913	0.0597876	0.13716	0.270803	0.0527537	0.232116	0.0246184	6735.25	19517.5	126.36	1988.27	0.17	7.68	71.15	55.46	5.82	212.35	133.05	82.66	8.14	2.02	153.81	353.54	507.35	4.32519	4.37426	8.81511	7.85	2.06051
2010-08-01	77.04	80.9939	71.9515	85.9826	1.73094	0.394248	0.326662	0.120152	0.187737	0.634551	0.206511	0.146435	0.176473	0.266587	0.0563211	0.168963	0.00750948	7283.95	21413.3	145.34	2118.14	0.18	7.81	64.92	49.1	5.81	209.59	139.42	82.79	7.74	2.02	147.71	356.75	504.46	4.34432	4.39437	8.89343	7.99	2.07819
2010-09-01	77.84	71.1685	68.9475	69.294	1.54733	0.3165	0.3376	0.0668167	0.207483	0.618934	0.249683	0.193417	0.196933	0.165283	0.0457167	0.0808834	0.01055	7709.3	22643.4	140.627	2162.34	0.18	8.36	59.92	44.06	5.43	177.79	109.19	80.58	6.54	1.89	140.5	293.52	434.02	4.35466	4.26505	8.95018	8.54	2.14476
2010-10-01	82.67	65.9919	62.0962	76.1689	1.43355	0.240021	0.282765	0.131518	0.345236	0.766095	0.361676	0.170974	0.124942	0.174262	0.0328796	0.082199	0.0164398	8292.41	23807.4	148.481	2346.57	0.12	9.42	64	47.24	5.29	161.46	93.59	73.45	6.12	1.93	137.45	261.17	398.62	4.41486	4.18953	9.0231	9.54	2.25549
2010-11-01	85.28	94.7052	98.6891	83.2665	2.03347	0.677824	0.681318	0.237588	0.387827	1.04818	0.356382	0.307467	0.600957	0.255057	0.055903	0.164215	0.0419273	8469.89	22909.3	156.1	2333.07	0.13	11.18	71.97	53.24	5.49	164.4	84.18	72.87	5.81	1.93	144.84	254.39	399.23	4.44594	4.55077	9.04427	11.31	2.42569
2010-12-01	91.45	97.2039	100.398	91.7621	2.11488	0.630688	0.528721	0.117074	0.354998	1.04234	0.415424	0.215265	0.483402	0.245478	0.0679784	0.192605	0.0453189	9147.26	24111.2	163.1	2350.67	0.1	10.46	81.14	62.77	5.75	197.44	93.38	85.67	7.23	2.06	166.81	298.05	464.86	4.51579	4.57681	9.12121	10.56	2.35707
2011-01-01	96.52	79.4216	76.5936	78.807	1.52777	0.47788	0.467019	0.0615451	0.257041	0.724061	0.35479	0.108609	0.231699	0.162914	0.0651654	0.202737	0.036203	9555.7	25646.2	179.18	2439.53	0.11	10.18	84.67	66.72	5.61	200.92	90.86	85.32	6.61	2.05	169.99	298.39	468.38	4.56975	4.37477	9.16489	10.29	2.33117
2011-02-01	103.72	90.0145	90.1893	85.4868	1.8025	0.328782	0.398406	0.286234	0.309442	1.00182	0.340386	0.123777	0.158589	0.162457	0.0386802	0.170193	0.0116041	9867.6	28252.2	187.18	2508.18	0.16	12.17	80.81	61.52	5.07	165.71	80.09	75.55	5.36	1.89	156.36	251.16	407.52	4.64169	4.49997	9.19701	12.33	2.51204
2011-03-01	114.64	136.888	126.966	157.48	2.93795	0.731991	0.52903	0.485776	0.52903	1.91649	1.32424	0.499085	0.116453	0.219597	0.109799	0.392614	0.0332723	9503.36	26710.3	169.36	2555.5	0.19	12.16	89.16	69.37	5.39	165.17	81.97	77	5.95	2.05	166.16	253.09	419.25	4.7418	4.91917	9.1594	12.35	2.51366
2011-04-01	123.26	91.0178	72.9232	111.945	1.91778	0.254034	0.268346	0.171741	0.2433	1.05907	0.779992	0.178897	0.0966045	0.110916	0.0393574	0.200365	0.0286236	9492.79	26408.3	179.33	2678.11	0.22	13.97	85.51	64.47	4.92	152.65	84.89	64.99	5.77	1.93	150.5	243.31	393.81	4.8143	4.51105	9.15829	14.19	2.65254
2011-05-01	114.99	105.345	95.5066	123.826	2.29569	0.217787	0.207076	0.217787	0.235639	1.04966	0.50698	0.171373	0.12139	0.217787	0.024992	0.167803	0	8959.9	24236.7	177.05	2596.45	0.25	13.49	86.79	66.1	4.94	166.54	90.78	67.57	6.29	2.01	154.36	263.61	417.97	4.74485	4.65724	9.10051	13.74	2.62031
2011-06-01	113.83	84.3918	71.3911	98.2728	1.79671	0.29165	0.363663	0.219638	0.259245	0.867749	0.40687	0.0828142	0.0900155	0.190833	0.0540093	0.378065	0.0180031	9066.85	22420.9	170.88	2557.76	0.28	12.48	84.2	64.06	5.49	187.75	106.41	75.94	6.72	1.89	160.14	300.88	461.02	4.73471	4.43547	9.11238	12.76	2.54632
2011-07-01	116.97	78.9248	59.019	102.112	1.5708	0.269174	0.269174	0.0921829	0.173304	0.844395	0.361357	0.110619	0.129056	0.169617	0.0258112	0.250737	0.00368732	9650.46	23848	172.98	2525.43	0.27	8.92	82.19	65.18	5.83	207.83	137.73	83.98	7.03	1.99	166.17	352.59	518.76	4.76192	4.36849	9.17476	9.19	2.21812
2011-08-01	110.22	86.9516	63.5047	112.499	1.70495	0.382209	0.299771	0.18361	0.23607	0.906809	0.44591	0.0936786	0.112414	0.134897	0.0637014	0.39345	0.0337243	9000.76	21845.1	177.5	2379.35	0.32	8.67	75.43	58.59	5.82	201.99	138.41	83.15	6.35	2.03	158.58	346.75	505.33	4.70248	4.46535	9.10506	8.99	2.19611
2011-09-01	112.83	83.3504	70.6067	95.2674	1.63707	0.287642	0.28054	0.170455	0.184659	0.696023	0.298295	0.106534	0.078125	0.18821	0.0710227	0.401278	0.00710227	8300.14	20377.6	177.23	2293.46	0.34	8.75	67.27	50.79	5.47	170.09	107.71	78.02	5.76	1.92	145.29	283.56	428.85	4.72588	4.42305	9.02403	9.09	2.20717
2011-10-01	109.55	76.3399	64.1851	92.3433	1.53468	0.309043	0.372256	0.316067	0.143986	0.684811	0.32309	0.0807726	0.101844	0.200176	0.0597015	0.24583	0.0105356	7394.19	19039	150.43	2180.65	0.32	12.47	71.03	50.92	5.3	155.98	94.83	73.9	5.64	2.02	144.93	256.45	401.38	4.69638	4.3352	8.90845	12.79	2.54866
2011-11-01	110.77	83.1577	95.5745	70.11	1.7399	0.619107	0.590642	0.305995	0.266856	0.81836	0.515922	0.152998	0.174346	0.156556	0.0355809	0.469667	0.0142323	7581.02	17873	135.54	2079.98	0.28	14.74	77.37	54.88	5.52	150.21	90.93	74.12	5.59	1.95	151.49	246.73	398.22	4.70746	4.42074	8.9334	15.02	2.70938
2011-12-01	107.87	85.3413	88.8941	77.4765	1.83326	0.460216	0.551499	0.239617	0.285258	0.859577	0.380344	0.197779	0.308078	0.159744	0.060855	0.311882	0.0190172	7565.48	18266.8	136.39	2022.25	0.31	13.06	84.66	63.39	5.83	162	101.54	82.84	5.6	2.07	167.5	269.14	436.64	4.68093	4.44666	8.93135	13.37	2.59301
2012-01-01	110.69	79.635	93.6096	62.0684	1.77563	0.438336	0.560921	0.282318	0.245171	0.83581	0.401189	0.193165	0.241456	0.174591	0.0520059	0.256315	0.00742942	8040.47	19854.8	140.26	2144.2	0.29	16.25	88.79	64.57	5.76	157.79	107.14	83.78	5.7	1.92	172.57	270.63	443.2	4.70673	4.37745	8.99224	16.54	2.80578
2012-02-01	119.33	92.4458	104.207	78.5999	1.90821	0.88745	0.818892	0.350409	0.293277	1.05504	0.567511	0.121882	0.15997	0.293277	0.0114264	0.358027	0.038088	8441.49	20393.7	140.4	2207.92	0.31	12.89	77.52	57.02	5.43	141.68	107.04	74.18	5.33	1.87	151.7	254.05	405.75	4.78189	4.52662	9.04091	13.2	2.58022
2012-03-01	125.45	88.76	87.8565	85.857	1.91048	0.686254	0.624181	0.220705	0.175874	0.92765	0.434513	0.217256	0.275881	0.175874	0.0482792	0.310366	0.0206911	8470.78	18660.8	144.66	2184.16	0.41	16.09	85.82	61.87	5.44	134.65	109.1	72.57	5.51	2.01	158.39	249.26	407.65	4.83191	4.48594	9.04438	16.5	2.80336
2012-04-01	119.75	96.0167	101.921	86.3844	1.96547	0.580535	0.800607	0.204895	0.356669	1.08898	0.497059	0.246633	0.311136	0.265604	0.0493265	0.512237	0.00758869	8289.48	17939.8	147.64	2049.67	0.49	14.41	81.39	59.56	4.96	123.63	111.32	65.46	5.62	1.97	146.85	240.57	387.42	4.78541	4.56452	9.02274	14.9	2.70136
2012-05-01	110.34	78.1712	80.6349	69.7435	1.62572	0.570809	0.480491	0.191474	0.289017	0.762283	0.357659	0.151734	0.180636	0.162572	0.025289	0.242052	0.0108382	7955.64	17068.2	136.61	2007.63	0.62	14.12	83.76	61.8	5.21	145.18	125.01	71.91	6.09	2.01	155.67	276.28	431.95	4.70357	4.3589	8.98164	14.74	2.69056
2012-06-01	95.16	77.8224	70.2322	82.1747	1.4888	0.796768	0.478809	0.243145	0.273071	0.931433	0.332922	0.0935174	0.104739	0.100999	0.0261849	0.467587	0.00748139	7423.02	16549.1	134.66	1890.18	0.69	13.63	80.51	58.9	5.32	160.05	132.29	75.89	5.95	1.97	156.4	298.29	454.69	4.55556	4.35443	8.91234	14.32	2.66166
2012-07-01	102.62	82.808	79.3363	91.0008	1.69818	0.754746	0.489045	0.211791	0.223343	0.866418	0.388925	0.0924179	0.10397	0.200239	0.0269552	0.589164	0.00385075	7584.26	16128.4	127.94	1876.25	0.66	10.1	80.49	61.89	5.79	190.33	157.44	81.22	6.28	2.05	161.71	354.05	515.76	4.63103	4.41652	8.93383	10.76	2.37584
2012-08-01	113.36	74.8784	70.9892	78.1116	1.73767	0.384903	0.302691	0.321375	0.160688	0.698804	0.227952	0.127055	0.0859492	0.14574	0.0112108	0.470852	0.0149477	7515.53	15735.2	107.5	1845.38	0.62	10.1	76.72	58.08	5.89	181.5	149.51	80.94	5.73	2.03	157.66	336.74	494.4	4.73057	4.31586	8.92473	10.72	2.37211
2012-09-01	112.86	69.2805	68.4028	65.8713	1.56857	0.340834	0.366488	0.14293	0.186909	0.597376	0.230888	0.128271	0.128271	0.128271	0.0183244	0.274866	0.0109946	8087.74	17288	99.47	2064.12	0.73	10.53	67.63	48.82	5.58	152.41	125.05	75	5.16	1.97	142.63	282.62	425.25	4.72615	4.23816	8.9981	11.26	2.42126
2012-10-01	111.71	81.6637	74.206	88.0309	1.56315	0.439637	0.34194	0.188416	0.240754	0.77111	0.30007	0.104676	0.0662945	0.0802512	0.0139567	0.408234	0.038381	8062.03	17168.7	113.95	1974.3	0.7	14.72	73.33	50.24	5.62	148.37	109.07	71.15	5.15	2.05	144.48	262.59	407.07	4.71591	4.40261	8.99492	15.42	2.73567
2012-11-01	109.06	81.3896	75.6585	89.0484	1.56832	0.3016	0.305148	0.166767	0.198701	0.777064	0.298052	0.113544	0.0816095	0.12064	0.0177412	0.369017	0.0106447	7711.23	16335.4	120.35	1948.83	0.64	13.56	76.6	54.65	5.66	156.38	96.64	68.41	5.08	2.09	145.01	258.1	403.11	4.6919	4.39925	8.95043	14.2	2.65324
2012-12-01	109.49	74.8316	66.2405	82.9786	1.56493	0.442684	0.306772	0.0970798	0.240758	0.733924	0.388319	0.178627	0.201926	0.0893135	0.0388319	0.333955	0.00388319	7966.49	17448.5	128.511	2086.76	0.68	16.81	87.59	61.99	6	162.07	101.26	80.19	5.52	2.11	167.78	268.85	436.63	4.69583	4.31524	8.983	17.49	2.86163
2013-01-01	112.96	90.6575	84.1399	108.949	1.75773	0.35595	0.341272	0.0880702	0.260541	1.09721	0.939415	0.304576	0.212836	0.117427	0.0110088	0.216506	0.018348	8047.36	17472.5	150.491	2037.75	0.64	17.26	93.42	67.49	5.93	166.61	106.01	83.8	6.18	2.1	177.22	278.8	456.02	4.72703	4.50709	8.9931	17.9	2.8848
2013-02-01	116.05	81.5903	77.6053	85.6582	1.83935	0.446023	0.465759	0.134202	0.32761	0.714427	0.592066	0.224985	0.359187	0.114466	0.0236827	0.173673	0.0157884	8060.93	17690.1	154.639	2053.59	0.73	16.14	83.02	58.91	5.35	149.13	95.65	71.9	4.9	1.89	154.92	249.68	404.6	4.75402	4.40171	8.99478	16.87	2.82554
2013-03-01	108.47	75.8967	81.8918	69.3968	1.64173	0.404227	0.411318	0.18793	0.195022	0.811999	0.372314	0.173747	0.453869	0.092192	0.0248209	0.319126	0	7645.58	16724.9	139.87	1909.57	0.92	17.82	86.32	59.64	5.83	158.81	102.69	73.7	5.24	2.11	160.02	266.74	426.76	4.68647	4.32937	8.94188	18.74	2.93066
2013-04-01	102.25	95.1079	99.5219	87.4728	2.21998	0.520365	0.647649	0.149745	0.232105	0.86478	0.374364	0.445493	0.8236	0.146002	0.0149745	0.232105	0	7234.28	15673	137.391	1861.67	0.93	19.53	87.31	59.63	5.22	138.49	94.35	67.36	4.85	2	154.67	237.69	392.36	4.62742	4.55501	8.88659	20.46	3.01847
2013-05-01	102.56	83.7173	75.3292	98.2276	1.7678	0.598889	0.27419	0.12988	0.194819	0.970488	0.454578	0.144311	0.24172	0.122664	0.0360776	0.292229	0	7249.41	14948	124.01	1832.02	0.99	18.23	89.45	62.56	5.6	147.41	100.68	73.58	5.33	2.07	163.03	253.42	416.45	4.63045	4.42745	8.88868	19.22	2.95595
2013-06-01	102.92	82.973	78.8219	86.6342	1.86461	0.563187	0.41478	0.197877	0.323452	0.88664	0.41478	0.156018	0.194071	0.117965	0.0304426	0.247346	0.0266372	7000.24	14280.3	114.815	1814.54	1.1	15.18	84.72	60.74	5.71	166.31	117.31	77.53	5.57	1.99	162.25	289.19	451.44	4.63395	4.41852	8.8537	16.28	2.78994
2013-07-01	107.93	73.9758	71.5572	72.6759	1.4334	0.302388	0.267044	0.12174	0.200283	0.820767	0.251335	0.0942507	0.180647	0.0785423	0.0392711	0.12174	0.0235627	6906.64	13750.3	127.191	1769.61	1.06	12.66	83.93	62.06	6.07	182.33	139.17	83.1	6.08	2.08	167.03	327.58	494.61	4.68148	4.30374	8.84024	13.72	2.61885
2013-08-01	111.28	90.9567	80.7396	106.979	2.05854	0.604553	0.271666	0.283145	0.286971	1.20911	0.497417	0.0765257	0.13392	0.176009	0.0420892	0.325234	0.0153051	7192.92	14314.9	137.055	1817.62	1.18	11.53	76.88	55.82	6.22	177.81	139.7	84.05	5.6	2.13	160.93	323.11	484.04	4.71205	4.51038	8.88085	12.71	2.54239
2013-09-01	111.6	100.459	100.384	100.163	2.36281	0.988994	0.36943	0.219349	0.338644	1.17756	0.638806	0.115447	0.146233	0.126991	0.0577234	0.253983	0.0115447	7159.27	13801.4	134.186	1761.3	1.33	13.7	71.49	48.65	5.76	159.38	118.49	77.67	5.17	2.05	149.16	283.04	432.2	4.71492	4.60975	8.87616	15.03	2.71005
2013-10-01	109.08	72.9531	65.5017	78.73	1.56606	0.502731	0.339976	0.169988	0.318276	0.784838	0.34721	0.0795689	0.108503	0.126587	0.0397844	0.213389	0.0397844	7203.02	14117.7	132.573	1814.58	1.36	16.14	76.8	51.36	5.81	147.94	105.23	74.82	5.02	2.13	151.62	258.19	409.81	4.69208	4.28982	8.88226	17.5	2.8622
2013-11-01	107.79	77.779	92.4989	52.4384	1.75724	0.636243	0.499905	0.38629	0.484757	0.905132	0.605946	0.128763	0.128763	0.159061	0.0568074	0.159061	0.022723	7070.65	13684	136.324	1747.96	1.23	18.14	82.33	55.01	5.92	147.86	101	76.57	5.03	2.03	158.9	253.89	412.79	4.68018	4.35387	8.86371	19.37	2.96373
2013-12-01	110.76	70.3725	70.0946	66.7907	1.63197	0.391341	0.358035	0.162365	0.241465	0.595337	0.29975	0.133222	0.166528	0.0791008	0.0374688	0.141549	0.10408	7214.9	13924.5	135.79	1739.81	1.31	16.64	90.93	64.49	6.29	170.13	110.18	83.53	5.53	2.2	174.46	285.84	460.3	4.70737	4.2538	8.8839	17.95	2.88759
2014-01-01	108.12	77.916	70.4808	83.1459	1.69678	0.522388	0.274941	0.184603	0.298507	0.683425	0.29458	0.0981932	0.117832	0.0942655	0.0157109	0.227808	0.125687	7291.47	14101.2	128.119	1727.41	1.82	21.02	97.14	65.58	6.53	195.33	111.47	93.91	9.81	2.19	191.05	316.61	507.66	4.68324	4.35563	8.89446	22.84	3.12851
2014-02-01	108.9	69.0035	73.2787	59.0866	1.45583	0.609706	0.294484	0.120282	0.447947	0.593115	0.369141	0.0912484	0.145168	0.103691	0.0165906	0.161759	0.31937	7149.21	14203.5	121.37	1695.17	1.9	16.55	82.91	56.62	5.88	178.15	94.04	81.48	5.3	1.96	164.39	277.49	441.88	4.69043	4.23416	8.87476	18.45	2.91506
2014-03-01	107.48	119.839	151.675	74.0619	2.7014	2.3293	0.606512	0.167442	0.986046	1.5107	0.71814	0.260465	0.230698	0.24186	0.0967442	0.301395	2.12465	6650.04	15678.1	111.833	1705.37	2.61	20.21	95.5	64.08	6.45	173.41	99.24	81.89	5.81	2.15	177.39	278.46	455.85	4.6773	4.78615	8.80238	22.82	3.12764
2014-04-01	107.76	93.2215	113.14	60.9063	2.10987	1.53804	0.425918	0.0709863	0.512679	0.792681	0.414087	0.244508	0.248452	0.102536	0.0236621	0.110423	1.3448	6673.56	17373.6	114.581	1810.67	2.84	20.9	91.45	59.75	5.87	143.96	97.48	73.3	4.57	2.09	164.75	246.01	410.76	4.67991	4.53498	8.80591	23.74	3.16716
2014-05-01	109.54	83.4289	91.6988	76.1504	1.80245	1.03857	0.455315	0.0940734	0.507996	0.726246	0.357479	0.146754	0.101599	0.101599	0.0376294	0.158043	0.88429	6891.13	19401.1	100.56	1751.05	3.16	17.56	89.37	60.53	5.94	153.5	110.9	79.72	4.83	2.18	169.09	269.23	438.32	4.69629	4.42399	8.83799	20.72	3.0311
2014-06-01	111.8	98.7671	95.323	107.182	2.1296	0.816942	0.222081	0.29743	0.416402	0.955742	0.436231	0.0674175	0.111041	0.118972	0.0436231	0.285533	0.646415	6821.14	18628.8	92.743	1838.95	3.31	17.82	87.94	58.43	6.25	171.85	120.79	85.73	4.79	2.13	173.67	297.43	471.1	4.71671	4.59276	8.82778	21.13	3.05069
2014-07-01	106.77	138.754	162.715	118.547	2.91833	1.85142	0.568761	0.129442	0.874716	1.41602	0.855103	0.168667	0.137287	0.145132	0.0784498	0.262807	1.60038	7113.38	19117.7	96.05	1948.3	3.22	14.46	84.56	58.04	6.63	186.24	138.61	91.18	5.56	2.21	175.74	330.41	506.15	4.67068	4.9327	8.86973	17.68	2.87243
2014-08-01	101.61	136.446	158.593	112.114	2.79732	1.49383	0.397252	0.198626	0.806919	1.29107	0.686916	0.227592	0.107589	0.161384	0.0620707	0.376562	1.36142	7001.84	18600.2	92.614	2030.49	3.32	12.03	77.21	53.14	6.53	183.91	144.75	91.3	5.62	2.19	168.51	334.28	502.79	4.62114	4.91593	8.85393	15.35	2.73112
2014-09-01	97.09	131.557	143.395	120.782	2.90623	1.50931	0.445568	0.533879	0.606134	1.53741	0.834939	0.156551	0.0682402	0.140495	0.0361272	0.541907	1.34072	6872.22	18034.8	82.3795	1990.43	3.36	13.61	71.3	46.16	6.08	158.63	128.94	87.32	5.68	2.09	158.62	293.25	451.87	4.57564	4.87944	8.83524	16.97	2.83145
2014-10-01	87.43	83.661	86.3335	77.1939	1.77173	0.475249	0.235724	0.155882	0.376397	1.00753	0.292753	0.0798418	0.0722378	0.13307	0.022812	0.391605	0.349783	6737.48	15812.4	81.06	1946.19	3.16	17.42	76.22	47.5	6.04	144.78	119.52	82.38	4.97	2.1	158.6	269.27	427.87	4.47084	4.42677	8.81544	20.58	3.02432
2014-11-01	79.44	84.3801	88.4699	76.3375	1.76236	0.776566	0.3742	0.221301	0.402366	0.98982	0.386271	0.144852	0.0844968	0.152899	0.0160946	0.221301	0.422484	6712.85	15807	73.73	2055.55	2.68	21.6	86.64	54.07	6.15	153.12	105.2	86.03	4.93	2.14	172.67	263.25	435.92	4.375	4.43533	8.81178	24.28	3.18965
2014-12-01	62.34	86.5262	81.2732	96.2374	1.77662	0.727194	0.252558	0.200305	0.261267	0.814283	0.261267	0.095798	0.104507	0.200305	0.0217723	0.174178	0.500762	6446.45	15962	68.39	1909.46	2.36	17.74	91.77	62.95	6.46	160.79	111.95	94.38	5.35	2.26	186.15	278.09	464.24	4.1326	4.46045	8.77128	20.1	3.00072
2015-01-01	47.76	111.986	83.5039	153.34	2.10244	0.636596	0.288981	0.259664	0.565398	1.10567	1.5873	0.217783	0.117268	0.217783	0.033505	0.276417	0.368556	5830.54	14849.2	68.23	1814.72	4.68	62.63	248.47	159.85	18.13	572.59	166.56	187.91	13.22	3.18	436.38	752.37	1188.75	3.86619	4.71837	8.67086	67.31	4.20931
2015-02-01	58.1	111.925	118.225	107.791	2.41744	1.3638	0.323846	0.205255	0.862069	1.09469	1.07645	0.196132	0.118591	0.123153	0.0228061	0.255428	1.13574	5729.27	14573.8	62.75	1817.82	6.38	55.12	233.54	152.03	17.03	558.2	153.48	164.63	15.78	2.98	398.17	727.46	1125.63	4.06217	4.71783	8.65334	61.5	4.11904
2015-03-01	55.89	104.235	117.489	83.6329	2.49619	0.790872	0.399555	0.531367	0.626107	0.947399	0.572558	0.0906207	0.107097	0.131812	0.0205956	0.263624	0.383079	5939.67	13755.5	58.05	1773.86	10.12	61.03	262.97	170.84	17.78	546.81	161.6	167.59	12.11	3.2	430.56	720.52	1151.08	4.02339	4.64665	8.68941	71.15	4.26479
2015-04-01	59.52	102.19	110.189	95.0865	2.44017	0.824725	0.501637	0.701441	0.459125	0.777962	0.544148	0.191302	0.199804	0.187051	0.0467627	0.212558	0.255069	6042.09	12830.9	52.28	1819.19	13.58	58.34	253.84	162.06	16.89	506.32	148.17	151.42	11.34	2.97	405.26	665.83	1071.09	4.08631	4.62684	8.70651	71.92	4.27555
2015-05-01	64.08	76.2623	77.6687	72.8619	1.66745	0.453205	0.29501	0.500235	0.252255	0.564368	0.337766	0.136816	0.128265	0.106888	0.0213776	0.158194	0.188123	6294.78	13511.3	60.3	1804.04	14.35	59.93	261.87	167.39	17.08	516.99	157.09	154.88	12.68	3.12	416.75	686.76	1103.51	4.16013	4.33418	8.74748	74.28	4.30784
2015-06-01	61.48	85.906	81.0661	88.7894	1.90975	0.705872	0.320457	0.311796	0.450372	0.740516	0.51966	0.112593	0.147237	0.103932	0.017322	0.242508	0.337779	5833.01	12825.2	62.63	1687.73	14.94	47.85	272.4	189.86	16.77	534.55	177.8	161.2	12.33	2.98	433.6	724.68	1158.28	4.11871	4.45325	8.67129	62.79	4.1398
2015-07-01	56.56	106.809	120.843	86.1688	2.45465	0.822546	0.727304	0.450236	0.606087	1.09961	0.705658	0.129876	0.112559	0.186155	0.0519503	0.415602	0.173168	5456.75	11413.1	52.39	1639.5	15.54	47.09	276.96	193.33	17.8	583.18	204.92	168.47	13.29	3.2	445.43	801.39	1246.82	4.0353	4.67104	8.60461	62.63	4.13724
2015-08-01	46.52	82.4785	85.3386	74.0283	1.86128	0.598436	0.442937	0.169635	0.296862	0.706814	0.414664	0.127226	0.131939	0.0989539	0.0235605	0.348695	0.164923	5127.3	10386	56.19	1548.13	14.55	43.32	265.03	185.47	18.45	586.57	199.65	169.15	13.33	3.24	434.18	799.55	1233.73	3.83988	4.41254	8.54233	57.87	4.0582
2015-09-01	47.62	98.7675	115.885	79.3454	2.28815	1.07012	0.417609	0.395859	0.526362	1.06142	0.569863	0.104402	0.121803	0.0652514	0.0261006	0.556812	0.44806	5217.25	9937.55	56.95	1589.6	11.7	47.47	261.57	182.36	17.1	511.33	182.51	158.71	12.56	2.94	420.28	706.4	1126.68	3.86325	4.59277	8.55973	59.17	4.08041
2015-10-01	48.43	91.9319	79.7263	108.514	2.03966	1.19622	0.275739	0.344674	0.348729	1.00564	0.401444	0.0892097	0.0648798	0.0851547	0.0324399	0.547423	0.356839	5216.09	10316.8	53.12	1516.49	8.43	54.65	263.89	179.97	17.64	494.01	176.89	157.04	12.45	3.2	420.93	683.35	1104.28	3.88012	4.52105	8.5595	63.08	4.1444
2015-11-01	44.27	150.716	113.044	213.994	3.16895	1.67123	0.488584	0.328767	0.721461	1.57991	2.79909	0.150685	0.114155	0.214612	0.0456621	1.04566	0.319635	4799.9	9244.33	46.86	1467.89	6.67	69.06	259.96	162.32	18.49	519.85	170.64	159.65	12.76	3.42	419.61	703.25	1122.86	3.79031	5.0154	8.47635	75.73	4.32717
2015-12-01	38.01	148.237	115.224	204.631	3.3494	0.968916	0.467244	0.427897	0.536101	1.30336	2.06079	0.172142	0.113122	0.265591	0.0934488	0.644305	0.167224	4638.83	8707.79	40.5	1497.2	5.6	74.38	263.55	160.49	19.53	555.91	178.74	179.12	14.07	3.55	442.67	748.72	1191.39	3.63785	4.99881	8.44222	79.98	4.38178
2016-01-01	30.7	118.211	124.239	109.529	2.50742	0.704486	0.695217	0.500556	0.477382	1.02429	1.01038	0.278087	0.477382	0.222469	0.111235	0.384687	0.111235	4471.79	8507.29	41.88	1481.1	10.26	74.18	291.98	181.67	21.98	533.33	210.44	185.9	18.07	3.89	477.88	761.84	1239.72	3.42426	4.77247	8.40554	84.44	4.43604
2016-02-01	32.18	103.75	91.322	117.582	2.24582	1.19385	0.49907	0.420785	0.660534	0.949212	0.631177	0.2055	0.357178	0.0831784	0.0146785	0.709463	0.215285	4598.62	8298.5	46.83	1531.26	12.72	75.98	290.9	177.8	20.78	500.26	184.58	170.36	17.27	3.62	461.26	702.11	1163.37	3.47135	4.64198	8.43351	88.7	4.48526
2016-03-01	38.21	109.72	98.0269	127.768	2.44896	0.778598	0.511521	0.23539	0.475307	0.96872	0.869132	0.239917	0.425513	0.153909	0.0860079	0.570368	0.176542	4953.8	8717.25	56.2	1531.01	18.12	72.54	306.35	190.21	21.78	511.23	196.24	176.47	17.4	3.7	482.82	724.87	1207.69	3.6431	4.69793	8.50791	90.66	4.50712
2016-04-01	41.58	85.2215	80.8224	93.123	2.01236	0.77613	0.362504	0.278849	0.306734	0.896965	0.725008	0.250964	0.260259	0.134777	0.0371799	0.316029	0.204489	4872.74	8878.86	60.92	1571.23	21.96	71.45	306.52	189.85	19.8	466.2	182.5	156.9	16.25	3.46	463.42	664.95	1128.37	3.72762	4.44525	8.49141	93.41	4.537
2016-05-01	46.74	88.3324	84.4614	93.6397	1.92106	0.655529	0.446124	0.245823	0.400601	1.01061	0.787545	0.236719	0.250376	0.0819411	0.0455228	0.309555	0.141121	4694.54	8660.35	55.13	1550.63	25.26	70.16	326.32	207.01	20.2	472.46	195.57	154.74	16.74	3.69	481.06	684.77	1165.83	3.8446	4.48111	8.45416	95.42	4.55829
2016-06-01	48.25	90.1681	80.5129	100.857	1.77467	0.542786	0.302072	0.169916	0.358711	1.03837	0.660783	0.146316	0.169916	0.108557	0.0141596	0.467268	0.108557	4641.97	8928.35	51.98	1593.51	25.39	54.91	317.8	214.15	19.89	526.39	220.07	157.8	17.15	3.46	475.6	763.61	1239.21	3.8764	4.50168	8.44289	80.3	4.38577
2016-07-01	44.95	114.61	97.098	145.149	2.46034	0.756274	0.378137	0.191524	0.648235	1.0853	1.07057	0.270098	0.265187	0.275009	0.0392869	0.820115	0.181702	4864.9	10262.9	57.26	1629.05	27.53	57.36	335.59	226.08	20.98	594.5	248.28	168.39	18.07	3.64	503.98	860.85	1364.83	3.80555	4.74154	8.4898	84.89	4.44136
2016-08-01	45.84	98.7385	82.4405	121.454	2.15009	0.935497	0.289436	0.201571	0.346289	0.7546	0.666736	0.139549	0.149886	0.129212	0.020674	0.599545	0.253256	4751.67	10336	60.89	1639.28	27.41	53.59	313.62	207.43	21.42	614.47	253.58	169.3	18.59	3.77	482.92	886.64	1369.56	3.82516	4.59247	8.46625	81	4.39445
2016-09-01	46.57	104.545	95.4896	121.15	2.61141	1.0486	0.584795	0.322646	0.272232	0.851986	0.604961	0.307522	0.443638	0.176447	0.0201654	0.473886	0.15124	4722.2	10191.8	57.79	1592.36	24.03	53.65	281.74	180.56	20.03	545.23	227.47	158.71	16.21	3.47	440.45	788.91	1229.36	3.84096	4.64962	8.46003	77.68	4.3526
2016-10-01	49.52	85.7478	79.6481	100.308	1.99764	0.996368	0.265044	0.289585	0.348483	0.780406	0.642976	0.0883479	0.112889	0.166879	0.0294493	0.41229	0.250319	4731.26	10259.7	59.09	1665.9	18.03	69.36	293.84	182.48	20.26	530.19	213.17	156.71	16.73	3.71	450.55	760.09	1210.64	3.90238	4.45141	8.46195	87.39	4.47038
2016-11-01	44.73	82.9188	81.2256	83.9751	1.91785	0.979437	0.476899	0.14871	0.410235	0.72304	0.630737	0.261525	0.241013	0.123071	0.0256397	0.312804	0.261525	5450.93	11128.9	73.1	1737.11	14.78	78.57	296.42	177.94	21.45	543.05	205.17	165.62	17.09	3.68	462.04	765.31	1227.35	3.80064	4.41786	8.60354	93.35	4.53636
2016-12-01	53.31	102.18	93.9366	113.979	2.29725	1.25597	0.585046	0.225431	0.687027	0.724599	0.687027	0.166389	0.311309	0.161022	0.0483066	0.585046	0.263003	5660.35	10972.3	80.02	1727.74	13.49	82.97	296.32	172.56	23.32	622.17	215.83	182.33	17.38	3.98	478.65	855.38	1334.03	3.97612	4.62674	8.64124	96.46	4.56913
2017-01-01	54.58	105.201	108.277	103.171	2.57293	1.23582	0.643233	0.278566	0.455835	0.815438	0.547002	0.192464	0.339344	0.182334	0.0658428	0.552066	0.334279	5754.56	9971.46	80.41	1791.24	15.47	79.71	307.69	182.76	24.91	578.15	219.72	187.66	19.38	4.84	495.35	817.25	1312.6	3.99967	4.65588	8.65775	95.18	4.55577
2017-02-01	54.87	114.206	125.665	97.1516	3.02346	1.07941	0.721445	0.275361	0.622315	0.903183	0.5342	0.556229	0.616808	0.165216	0.0165216	0.324926	0.413041	5940.91	10643.3	89.44	1860.75	17.1	83.22	296.03	167.88	23.36	531.1	183.26	165.37	16.95	4.47	461.4	731.31	1192.71	4.00497	4.73801	8.68962	100.32	4.60837
2017-03-01	51.59	96.6359	95.8384	95.6745	2.14382	0.793117	0.629687	0.201884	0.331667	0.927706	0.442223	0.394155	0.572005	0.144203	0.0144203	0.322053	0.221111	5824.63	10204.7	87.65	1901.47	26.41	89.77	338.89	192.89	25	555.28	197.27	176.84	18.21	4.82	515.73	770.76	1286.49	3.94333	4.57095	8.66985	116.18	4.75514
2017-04-01	52.31	119.46	127.447	108.069	3.0787	1.43953	1.07702	0.183881	0.457077	0.835347	0.761795	0.451823	0.99296	0.147105	0.0525376	0.493853	0.21015	5683.9	9609.28	70.22	1921.22	29.7	86.69	325.04	181.21	22.63	498.58	182.09	159.28	16.07	4.81	484.32	696.74	1181.06	3.95719	4.78298	8.64539	116.39	4.75695
2017-05-01	50.33	102.58	102.355	99.7048	2.51828	0.868197	0.690496	0.446791	0.487409	0.995126	0.599106	0.319862	0.751422	0.0913891	0.0253859	0.289399	0.157392	5599.56	9155.12	62.43	1913.02	34.46	79.01	345.66	204.82	22.59	516.16	194.79	161.6	16.49	4.78	507.26	727.44	1234.7	3.9186	4.63064	8.63044	113.47	4.73154
2017-06-01	46.37	126.789	113.168	146.672	2.85862	0.825593	0.541796	0.737874	0.495356	1.57379	0.737874	0.185759	0.423117	0.227038	0.0309598	0.417957	0.170279	5719.76	8931.76	57.48	1885.29	35.38	70.81	349.56	216.97	21.8	542.98	217.62	163.9	15.98	4.6	513.46	776.58	1290.04	3.83665	4.84252	8.65168	106.19	4.66523
2017-07-01	48.48	102.813	125.599	71.9551	2.62279	1.37233	0.906056	0.349706	0.720606	0.688815	0.529857	0.429185	1.05971	0.143062	0.0158957	0.349706	0.386796	5985.12	9491.39	67.74	1902.96	35.52	62.16	358.35	232.29	23.75	628.95	257.49	174.52	18.2	4.63	532.87	904.64	1437.51	3.88115	4.63292	8.69703	97.68	4.5817
2017-08-01	51.7	138.532	160.023	108.436	3.55693	1.08417	1.25507	0.21363	0.453963	0.972015	0.582141	0.854518	1.81585	0.181585	0.0587481	0.283059	0.186926	6485.63	10890	76.07	2030.01	34.08	59.5	342.04	220.01	23.9	619.22	245.95	177.67	19.18	4.55	519.71	884.35	1404.06	3.94546	4.9311	8.77734	93.58	4.53882
2017-09-01	56.15	115.534	142.145	84.0963	2.88111	1.17841	1.21836	0.129825	0.494333	1.15344	0.64413	0.748989	1.61282	0.284616	0.0848854	0.22969	0.194737	6577.17	11215.8	71.53	2096.49	30.68	68.4	334.5	209.34	21.59	532.4	217.99	169.06	16.9	4.49	503.56	767.29	1270.85	4.02803	4.74957	8.79136	99.08	4.59593
2017-10-01	57.51	91.4616	109.231	69.157	2.09804	0.742635	0.604659	0.231312	0.568136	0.982063	0.584368	0.255661	0.673647	0.121743	0.0324649	0.324649	0.105511	6807.6	11335.8	61.66	2131.49	27.17	93.14	346.75	199.74	22.18	514.47	210.86	166.26	16.29	4.52	513.01	741.62	1254.63	4.05196	4.51592	8.82579	120.31	4.79007
2017-11-01	62.71	92.596	103.944	80.1159	2.17556	0.631207	0.75324	0.605959	0.298771	0.500757	0.340852	0.416597	0.77428	0.155698	0.0294563	0.19357	0.100993	6826.55	11972	64.24	2097.44	21.85	94.19	337.54	192.79	24.04	558.42	210.71	172.25	16.04	4.67	509.79	785.17	1294.96	4.13852	4.52825	8.82857	116.04	4.75393
2017-12-01	64.37	82.7183	95.9084	62.6575	2.00128	0.79046	0.731061	0.246733	0.246733	0.625971	0.310701	0.328977	0.904688	0.0639678	0.036553	0.150781	0.150781	6833.89	11495.1	72.25	2080.47	19.07	104.56	345.16	190.86	26.06	633.8	224.62	191.28	18.13	4.61	536.44	876.55	1412.99	4.16465	4.41544	8.82965	123.63	4.81729
2018-01-01	69.08	92.4268	107.644	75.6663	2.2039	1.03254	0.685466	0.308026	0.425163	0.715835	0.446855	0.251627	0.715835	0.177874	0.0520607	0.433839	0.0954447	7065.85	12864.9	76.34	2209.73	22.16	110.91	407.18	239.57	29.66	647.28	255.54	195.38	25.12	4.88	602.56	927.94	1530.5	4.23527	4.52642	8.86303	133.07	4.89088
2018-02-01	65.32	64.4914	74.6831	52.0022	1.59025	0.743978	0.292942	0.139496	0.302241	0.67423	0.306891	0.130196	0.376639	0.0790477	0.0371989	0.409188	0.106947	7006.52	13595.9	77.46	2181.79	24.89	93.48	379.11	227.2	28.78	606.58	237.74	175.88	19.02	4.76	554.99	863.34	1418.33	4.1793	4.16653	8.8546	118.37	4.77382
2018-03-01	66.02	111.962	146.927	64.5576	2.74906	1.42262	0.94574	0.248457	0.70129	1.55085	0.657209	0.480885	0.977799	0.132243	0.112206	0.232428	0.296546	6799.18	13392.5	70.35	2069.24	32.77	110.34	423.37	245.18	30.08	607.44	244.87	183.08	21.08	5	606.45	873.39	1479.84	4.18996	4.71816	8.82456	143.11	4.96361
2018-04-01	72.11	123.263	146.396	94.3059	3.36026	1.76651	1.10569	0.440548	0.552844	1.65853	1.01931	0.328251	0.924286	0.146849	0.0388719	0.388719	0.207317	6851.51	13938.1	65.75	2254.69	45.54	104.89	436.27	250.28	29.96	576.49	245.59	164.46	22.88	5.6	600.73	844.96	1445.69	4.27819	4.81432	8.83222	150.43	5.0135
2018-05-01	76.98	125.667	172.217	63.2179	3.31961	1.25641	1.52114	0.508446	0.924447	1.37407	0.983276	0.567275	1.31944	0.285738	0.0504244	0.214304	0.130263	6825.27	14366.5	66.1	2299.67	50.36	92.41	453.85	274.35	30.92	608.55	267.59	173.7	23.91	5.81	627.55	900.05	1527.6	4.34355	4.83363	8.82839	142.77	4.96123
2018-06-01	74.41	103.969	137.024	56.6404	2.62277	0.892156	1.16889	0.268473	0.557598	1.05737	0.660857	0.549337	0.949981	0.161084	0.107389	0.189996	0.140432	6965.86	15105.6	65.04	2237.62	51.21	84.23	442.95	271.18	30.87	630.74	292.61	178.4	23.78	5.46	621.35	947.13	1568.48	4.30959	4.64409	8.84878	135.44	4.90853
2018-07-01	74.25	110.028	129.102	84.4085	2.68539	1.14417	1.02463	0.196388	0.674551	1.11429	0.512317	0.384238	0.666012	0.175042	0.0597703	0.243351	0.268966	6250.75	13793.9	64.56	2082.24	54.01	73.12	455.75	290.05	32.98	714	354.35	190.66	27.39	5.59	646.41	1095.74	1742.15	4.30744	4.70074	8.74046	127.13	4.84521
2018-08-01	72.53	112.742	145.114	68.5756	2.80826	1.16451	0.96296	0.371747	0.452367	1.17347	0.340395	0.277691	0.689748	0.147803	0.0806199	0.631522	0.129888	6051.05	13411.4	67.15	2051.51	51.98	77.48	446.09	277.81	33.1	720.67	348.54	188.35	28.33	5.72	634.44	1097.54	1731.98	4.284	4.7251	8.70799	129.46	4.86337
2018-09-01	78.89	75.0539	88.6236	51.1639	1.81856	0.818984	0.772785	0.117598	0.239395	0.676187	0.327593	0.159597	0.390592	0.155397	0.0377992	0.285594	0.125997	6050.76	12510.4	68.44	2026.46	44.76	85.87	419.61	252.2	31.29	619.24	308.36	177.18	24.33	5.49	596.79	951.93	1548.72	4.36805	4.31821	8.70794	130.63	4.87237
2018-10-01	81.03	92.0165	115.212	61.1505	2.38919	1.01335	1.03806	0.659087	0.494315	0.848575	0.539628	0.321305	0.420168	0.205965	0.0617894	0.543747	0.11534	6219.59	12314.9	73.41	2029.86	41.26	99.57	435.3	257.49	31.37	597.03	292.6	177.53	22.35	5.61	612.83	911.98	1524.81	4.39482	4.52197	8.73546	140.83	4.94755
2018-11-01	64.75	80.4076	105.167	47.4022	1.94549	0.826516	0.665452	0.648497	0.364515	0.928241	0.529818	0.207689	0.347561	0.182257	0.0423855	0.49591	0.305175	6195.92	11239.7	73.26	1938.51	32.27	103.29	422.2	249.59	31.32	644.45	283.04	186	21.52	5.73	608.2	949.01	1557.21	4.17053	4.38711	8.73165	135.56	4.90941
2018-12-01	57.36	90.6077	106.063	66.2409	2.23422	0.934053	0.81671	0.366111	0.375499	1.05609	0.380192	0.234687	0.370805	0.0797935	0.0140812	0.50223	0.291012	6075.32	10835.1	69.16	1920.38	27.6	119.95	433.07	245.7	33.86	724.5	294.49	205.28	24.56	5.96	638.35	1043.55	1681.9	4.04935	4.50654	8.71199	147.55	4.99417
2019-01-01	59.41	87.4241	112.98	55.7335	2.24819	0.998725	0.926477	0.314492	0.365491	0.777731	0.361241	0.161496	0.458989	0.0892478	0.182745	0.41224	0.118997	5939.1	11523.1	76.16	1853.72	35.33	122.93	497.3	291.58	40.16	811.18	447.18	242.51	41.42	7.3	739.81	1299.78	2039.59	4.08446	4.47077	8.68931	158.26	5.06424
2019-02-01	63.96	96.8002	127.857	57.5117	2.43131	1.0575	1.07166	0.273817	0.575961	1.01501	0.623171	0.14163	0.505146	0.363516	0.207724	0.302143	0.0896988	6300.49	12685.2	88.22	1862.99	39.59	109.08	466.52	275.28	35.85	758.24	394.54	219.76	34.56	6.72	686.28	1187.34	1873.62	4.15826	4.57265	8.74838	148.67	5.00173
2019-03-01	66.14	82.3283	90.7896	66.6412	1.87703	0.56311	0.771669	0.241929	0.312839	0.709101	0.329524	0.0959373	0.554768	0.308668	0.112622	0.262785	0.045883	6439.46	13026.3	86.47	1871.21	56.08	133.31	532.22	298.24	37.31	759.49	409.06	232.4	34.03	7.28	764.62	1202.58	1967.2	4.19177	4.41071	8.7702	189.39	5.24381
2019-04-01	71.23	79.2534	95.4554	57.5155	1.9384	0.805802	0.559585	0.326797	0.264124	0.814755	0.510341	0.277554	0.407378	0.353657	0.0313367	0.259647	0.152207	6438.36	12772.8	93.7	1845.42	61.73	118.28	524.31	303.56	33.75	698.59	379.4	214.95	31.66	6.99	739.26	1109.65	1848.91	4.26591	4.37265	8.77003	180.01	5.19301
2019-05-01	71.32	106.472	134.973	64.6634	2.77658	0.971375	1.17339	0.580246	0.545861	1.30663	0.511476	0.447004	0.550159	0.262185	0.111751	0.318061	0.0859623	6017.9	12016.3	100.15	1781.26	67.31	117.69	568.62	342.54	33.96	712.22	401.53	218.38	32.67	7.12	787	1146.42	1933.42	4.26718	4.66788	8.70249	185	5.22036
2019-06-01	64.22	106.588	142.653	53.4206	2.8691	0.901717	1.29433	0.707568	0.625593	0.99232	0.543619	0.785227	0.422815	0.207093	0.0345155	0.280438	0.112175	5882.23	11943.9	108.94	1755.95	68.34	102.72	552.65	341.7	33.26	733.67	430.27	217.12	33.88	6.63	769.77	1197.82	1967.59	4.16231	4.66898	8.67969	171.06	5.14201
2019-07-01	63.92	93.5213	126.931	47.4189	2.3759	0.800814	0.75657	0.331829	0.517653	1.2344	0.579595	0.331829	0.3628	0.172551	0.0309707	0.336253	0.0884877	5941.2	13546.3	120.24	1796.99	68.36	100.17	575.57	363.51	36.55	820.89	493.9	229.34	37.98	6.98	804.91	1352.77	2157.68	4.15763	4.53819	8.68967	168.53	5.12711
2019-08-01	59.04	103.404	124.725	70.0974	2.74754	0.836209	1.21671	0.25219	0.579595	1.15034	0.495531	0.43359	0.482258	0.345102	0.132732	0.150429	0.154854	5709.44	15748.6	93.07	1740.68	68.45	98.64	562.68	351.01	37.54	818.46	492.52	229.49	37.9	7.04	792.17	1348.88	2141.05	4.07822	4.63865	8.64988	167.09	5.11853
2019-09-01	62.83	90.368	110.871	67.8102	2.33403	0.580185	0.726339	0.903494	0.411887	0.956641	0.580185	0.23916	0.327738	0.155011	0.0354312	0.217016	0.186014	5759.25	17656.9	93.08	1753.51	61.69	105.98	526.13	316.53	34.91	742.3	454.9	216.69	34.87	7.02	742.82	1232.07	1974.89	4.14043	4.50389	8.65856	167.67	5.122
2019-10-01	59.71	97.8367	121.311	69.9666	2.46784	1.07206	0.672665	0.420415	0.361557	1.09728	0.533928	0.269066	0.235433	0.168166	0.130329	1.17716	0.218616	5757.3	17046.2	88.53	1725.96	54.61	117.7	520.31	305.5	35.49	717.51	441.5	217.65	31.66	7.01	737.96	1190.67	1928.63	4.0895	4.5833	8.65822	172.31	5.1493
2019-11-01	63.21	73.0784	84.5873	53.0325	1.73856	0.470951	0.602993	0.114437	0.3125	0.805458	0.34331	0.180458	0.171655	0.0792254	0.0880282	0.268486	0.149648	5859.95	15171.8	84.98	1774.79	44.55	127.17	510.69	294.61	37.6	764.41	415.26	222.72	34.11	6.76	733.41	1213.78	1947.19	4.14646	4.29153	8.6759	171.72	5.14587
2019-12-01	67.31	74.2799	80.1108	63.3314	1.72313	0.582468	0.601883	0.296088	0.271818	0.810601	0.427143	0.160179	0.271818	0.0922241	0.097078	0.300942	0.184448	6077.06	13829.4	92.65	1771.38	42	142.65	523.57	290.69	41.11	840.16	438.84	240.66	38.58	7.12	764.23	1317.58	2081.81	4.20931	4.30784	8.71228	184.65	5.21846
2020-01-01	63.65	138.421	190.844	81.6509	3.62233	1.17803	1.25745	0.803	1.0236	1.68542	1.04125	0.304434	0.388264	0.180896	0.0529451	0.533863	0.476506	6031.21	13506.9	95.76	1773.09	45.29	133.53	505.77	279.56	40.09	727.74	452.51	237.08	40.96	7.3	742.85	1221.21	1964.06	4.1534	4.9303	8.7047	178.82	5.18638
2020-02-01	55.66	75.9556	87.1625	56.6861	1.51583	0.659831	0.87383	0.178333	0.490415	0.82033	0.414623	0.263041	0.200624	0.213999	0.0312082	0.459206	0.142666	5687.75	12715.5	87.68	1688.1	50.39	142.95	516.99	279.06	37.67	696.84	414.46	215.89	34.94	6.92	732.88	1146.24	1879.12	4.01926	4.33015	8.64607	193.34	5.26445
2020-03-01	32.01	81.54	97.0901	62.903	1.71028	0.42757	0.671284	0.0812382	0.320677	0.842312	0.329229	0.179579	0.265093	0.11972	0.0726869	0.329229	0.042757	5182.63	11846.2	88.99	1610.89	67.23	147.99	565.07	303.55	38.7	679.1	412.1	224.74	31.76	7.6	789.81	1122.96	1912.77	3.46605	4.40109	8.55307	215.22	5.37166
2020-04-01	18.38	69.3394	81.7608	47.5912	1.53196	0.352816	0.6035	0.134627	0.255327	0.612785	0.315677	0.106773	0.1207	0.116058	0.0882039	0.06035	0.0789193	5057.97	11804	84.73	1459.93	77.44	123.83	527.09	281.99	36.61	631.36	358.47	207.37	25.91	7.22	734.46	1015.74	1750.2	2.91126	4.23901	8.52872	201.27	5.30465
2020-05-01	29.38	68.5072	83.3555	42.2956	1.70782	0.292898	0.761536	0.0811103	0.315429	0.599315	0.19827	0.135184	0.193764	0.153208	0.036049	0.108147	0.0540735	5239.83	12179.6	93.65	1466.37	81.99	127.56	568.8	314.47	37.64	675.94	372.53	210.64	27.95	7.14	779.44	1076.42	1855.86	3.38031	4.22694	8.56404	209.55	5.34496
2020-06-01	40.27	71.2279	85.8666	49.7609	1.6519	0.48911	0.77058	0.0599852	0.267626	0.664452	0.253784	0.147656	0.267626	0.322997	0.0830565	0.124585	0.0784422	5754.6	12727.1	103.3	1568.57	78.4	117.89	587.88	348.71	36.03	717.04	425.73	206.45	31.95	6.85	794.33	1174.72	1969.05	3.69561	4.26588	8.65775	196.29	5.27959
2020-07-01	43.24	66.4733	88.738	36.2521	1.53922	0.400558	0.927134	0.0945137	0.20703	0.661596	0.301544	0.288042	0.27454	0.229533	0.0225033	0.157523	0.090013	6372.46	13402.3	108.52	1643.81	81.58	109.47	622.15	386.32	37.76	785.37	499.19	213.66	35.42	7.02	835.81	1319.98	2155.79	3.76677	4.1968	8.75974	191.05	5.25254
2020-08-01	44.74	65.466	90.0091	28.4546	1.45599	0.512044	0.663431	0.129124	0.436351	0.578833	0.449708	0.20927	0.17365	0.0979563	0.0489781	0.15584	0.138029	6498.94	14537.8	121.07	1737.26	82.58	112.21	613.65	372.66	39.19	830.76	500.08	211.94	36.73	7.01	825.59	1367.57	2193.16	3.80087	4.18153	8.77939	194.79	5.27192
2020-09-01	40.91	80.3774	101.258	49.5181	1.69833	0.932067	0.860369	0.103065	0.631834	0.734899	0.53325	0.183725	0.197168	0.215092	0.0134433	0.398817	0.268865	6704.9	14857.5	123.75	1743.77	73.9	109.99	581.72	354.62	36.33	728.61	446.98	203.81	34.61	6.88	785.53	1210.2	1995.73	3.71137	4.38673	8.81059	183.89	5.21434
2020-10-01	40.19	76.0832	97.6526	42.6814	1.66196	0.852069	0.649597	0.11389	0.396507	0.662252	0.565234	0.105454	0.130763	0.118109	0.0337453	0.52727	0.0843633	6713.81	15239.4	119.78	1806.1	65.03	140.68	601.01	350.58	37.66	699.97	425.54	210.59	31.63	7.06	811.6	1157.14	1968.74	3.69362	4.33183	8.81192	205.71	5.32647
2020-11-01	42.69	70.0675	79.0364	62.3139	1.31235	0.454274	0.417565	0.137659	0.330381	0.637819	0.504749	0.110127	0.137659	0.183545	0.0412977	0.192722	0.123893	7068.91	15807.7	124.36	1935.28	54.76	144.26	539.51	292.19	41.2	770.94	412.7	218.29	34.25	7.1	757.8	1217.89	1975.69	3.75396	4.24946	8.86346	199.02	5.29341
2020-12-01	49.99	64.0673	86.8153	31.7444	1.43532	0.576015	0.594901	0.221907	0.396601	0.443815	0.505194	0.0944287	0.188857	0.118036	0.0283286	0.217186	0.0424929	7772.24	16823	155.43	2014.67	51.23	157.21	558.65	296.41	46.37	893.94	454.9	239.11	42.15	7.43	797.76	1390.99	2188.75	3.91182	4.15993	8.95831	208.44	5.33965
2021-01-01	54.77	77.4187	98.4756	48.2875	1.9019	0.592684	0.774028	0.199036	0.291919	0.5573	0.291919	0.123844	0.27865	0.123844	0.101729	0.154806	0.14596	7972.15	17863.2	169.63	2003.98	57.31	159.38	559.98	291.03	44.59	820.57	454.46	236.89	42.68	7.67	796.87	1317.71	2114.58	4.00314	4.34923	8.98371	216.69	5.37847
2021-02-01	62.28	73.9568	94.4836	46.3268	1.57549	0.512275	0.715252	0.198144	0.401121	0.705587	0.439783	0.20781	0.178813	0.140151	0.0289967	0.135318	0.0579934	8470.94	18584.4	163.8	2078.59	63.48	151.77	542.45	278.69	41.94	794.6	402.03	211.86	33.28	6.57	754.31	1229.91	1984.22	4.13164	4.30348	9.0444	215.25	5.3718
2021-03-01	65.41	78.6188	100.852	49.418	1.75983	0.633188	0.838428	0.227074	0.371179	0.733624	0.480349	0.375546	0.331878	0.31441	0.0436681	0.20524	0.0960699	8988.25	16406.7	168.18	2190.48	84.72	169.42	595.79	290.16	43.94	812.14	423.39	229.66	33.24	7.55	825.45	1268.77	2094.22	4.18068	4.36461	9.10367	254.14	5.53789
2021-04-01	64.81	88.1662	109.587	67.8738	1.97868	1.19652	0.735602	0.0838028	0.474882	0.800782	0.572652	0.274687	0.190884	0.181573	0.0605242	0.19554	0.716979	9324.82	16521.2	179.83	2319.39	89.7	153.77	577.19	285.38	40.98	746.62	403.53	209.48	29.12	7.36	786.67	1179.27	1965.94	4.17146	4.47922	9.14043	243.47	5.49499
2021-05-01	68.53	93.0071	120.783	52.6261	2.01726	0.826897	0.636074	0.0908678	0.527033	0.890504	0.513403	0.204453	0.258973	0.30895	0.0408905	0.140845	0.327124	10162	17577.1	207.72	2433.53	99.43	162.55	636.06	325.01	41.79	737.3	403.33	217.27	31.69	7.28	853.33	1172.32	2025.65	4.22727	4.53268	9.22641	261.98	5.56827
2021-06-01	73.16	74.1271	92.5465	46.3486	1.69885	0.830858	0.728741	0.102117	0.3899	0.728741	0.487375	0.162458	0.204233	0.185667	0.0371333	0.185667	0.287783	9631.5	17979.6	214.43	2446.65	100.63	126.45	614.35	339.04	41.31	793.99	458.84	219.62	35.71	6.92	833.97	1288.54	2122.51	4.29265	4.30578	9.17279	227.08	5.4253
2021-07-01	75.17	58.4208	64.0363	50.7158	1.25034	0.488483	0.524334	0.0627409	0.215112	0.54226	0.206149	0.138926	0.17926	0.170297	0.0134445	0.134445	0.143408	9450.82	18818.5	214.14	2497.64	100.07	129.68	647.19	365.56	44.8	873.77	500.2	230.54	38.11	7.08	877.73	1412.08	2289.81	4.31975	4.06767	9.15386	229.75	5.43699
2021-08-01	70.75	89.4865	103.202	76.4829	2.1482	0.685494	0.588945	0.0627565	0.444123	0.955829	0.362056	0.139995	0.193097	0.144823	0.0193097	0.246198	0.125513	9370.14	19141.3	162.16	2602.99	97.76	129.64	633.9	355.08	44.28	868.69	500.19	229.44	40.04	7.14	863.34	1408.92	2272.26	4.25915	4.49409	9.14528	227.4	5.42671
2021-09-01	74.49	80.697	92.0473	67.9403	1.91948	0.603933	0.838015	0.102996	0.234082	1.02996	0.636704	0.388577	0.271536	0.430712	0.093633	0.126404	0.0655431	9324.71	19376.9	124.52	2834.56	88.59	127.39	604.36	340	41.32	768.01	443.9	222	36.68	7.06	826.36	1248.59	2074.95	4.31066	4.3907	9.14042	215.98	5.37519
2021-10-01	83.54	79.0292	93.808	61.1491	1.64449	0.546668	0.761751	0.10306	0.295739	0.7035	0.416723	0.20164	0.20164	0.255411	0.00896178	0.25093	0.107541	9829.22	19362.4	122.91	2934.39	81.9	162.78	607.47	314.4	41.15	733.13	437.24	223.12	37	7.24	830.59	1207.37	2037.96	4.42533	4.36982	9.19311	244.68	5.49995
2021-11-01	81.05	86.5691	121.501	39.7427	1.86212	1.21298	0.79602	0.127932	0.720208	1.0045	0.634921	0.156361	0.170576	0.156361	0.00947643	0.360104	0.568586	9728.9	19932.9	96.24	2636.45	69.97	168.68	576.3	287.46	42.91	761.87	434.88	226.25	39.22	7.28	802.55	1235.97	2038.52	4.39507	4.46094	9.18286	238.65	5.475
2021-12-01	74.17	105.345	155.31	47.6549	2.4784	1.72303	0.863984	0.148112	0.863984	1.18489	0.691187	0.236979	0.162923	0.148112	0.0148112	0.162923	1.50086	9551.18	20015.5	116.96	2695.53	67.11	187.21	600.22	290.05	48.28	863.18	455.29	249.9	43.21	7.57	850.12	1361.68	2211.8	4.30636	4.65724	9.16442	254.32	5.53859
2022-01-01	86.51	138.675	199.488	63.2515	3.31588	2.77778	0.795036	0.21815	1.24103	1.71611	1.11984	0.252085	0.334497	0.21815	0.121194	0.193911	2.59356	9782.34	22355.4	132.53	3005.98	73.79	175.59	593.6	289.22	47.3	848.44	464.4	245.36	48.54	7.7	838.96	1361.38	2200.34	4.46026	4.93213	9.18833	249.38	5.51898
2022-02-01	97.13	216.159	320.606	105.218	4.87768	5.39615	1.50005	0.17618	2.57223	2.90446	1.7618	0.604047	0.317125	0.171147	0.186248	0.307057	5.01359	9943.17	24015.5	142.84	3245.79	79.37	180.95	580.69	269.05	44.4	805.9	405.69	216.5	38.65	6.92	797.19	1250.24	2047.43	4.57605	5.37601	9.20464	260.32	5.56191
2022-03-01	117.25	318.955	403.714	250.956	6.89937	8.80116	2.47472	0.45739	2.66249	3.9143	1.98363	0.698122	0.717381	0.46702	0.129995	0.876264	8.70486	10230.9	33924.2	152.07	3498.37	102.74	190.67	652.56	306.09	45.45	801.55	429.04	221.6	36.67	7.61	874.16	1267.26	2141.42	4.76431	5.76505	9.23317	293.41	5.68157
2022-04-01	104.58	191.143	221.911	184.418	3.96594	4.82911	1.12563	0.12831	1.67386	2.39706	0.921498	0.268284	0.303278	0.414091	0.0933162	0.431588	4.90493	10161.4	33132.7	151.25	3244.41	114.45	191.97	663.91	308.93	41.07	708.18	383.05	199.6	35.43	7.49	863.51	1126.66	1990.17	4.64995	5.25302	9.22635	306.42	5.72496
2022-05-01	113.34	142.258	166.425	140.137	3.1464	3.19167	1.0073	0.0509309	1.04691	1.69204	0.718692	0.486673	0.418765	0.350857	0.0452719	0.407447	3.19167	9377.15	28062.5	131.21	2830.32	125.74	181.68	710.47	354.18	41.32	710.31	409.47	203.91	36.07	7.55	914.38	1155.85	2070.23	4.73039	4.95765	9.14603	307.42	5.72821
2022-06-01	122.71	130.707	160.727	114.815	2.8785	3.02567	0.853544	0.188368	1.28326	1.60702	0.924182	0.341417	0.288439	0.376737	0.0824111	0.559218	3.04921	9024.46	25658.6	130.74	2563.44	126.34	156.63	712.86	380.44	42.3	771.68	462.22	201.02	36.64	7.15	913.88	1270.54	2184.42	4.80982	4.87296	9.10769	282.97	5.64534
2022-07-01	111.93	117.177	141.243	97.8387	2.58511	2.69548	0.813291	0.418264	0.894621	1.1328	0.540258	0.174277	0.197514	0.273034	0.0929476	0.627396	2.67805	7544.81	21481.9	108.57	2408.42	130.09	149.21	711.45	378.05	46.83	887.56	517.77	215.14	39.28	7.27	926.59	1444.61	2371.2	4.71787	4.76368	8.92862	279.3	5.63229
2022-08-01	100.45	132.863	159.383	111.159	3.1324	2.41592	1.23757	0.124349	0.609901	1.15467	0.574372	0.509237	0.307911	0.248697	0.0532923	0.343439	2.27973	7981.84	22057.4	108.85	2430.79	126.76	136.23	673.22	354.4	48.5	927.29	519.66	217.47	40.11	7.33	890.69	1487.06	2377.75	4.60966	4.88932	8.98492	262.99	5.57212
2022-09-01	89.76	131.986	170.312	108.628	2.92783	3.02209	1.13697	0.111929	0.989691	1.35493	0.665685	0.294551	0.430044	0.506627	0.0471281	0.46539	2.92783	7746.01	22774	99.81	2224.76	116.68	144.64	620.23	307.91	43.94	785.46	458.28	203.88	38.06	7.06	824.11	1281.8	2105.91	4.49714	4.88269	8.95493	261.32	5.56575
2022-10-01	93.33	143.162	185.284	112.675	3.40225	3.38521	1.18142	0.369192	0.840623	1.26093	0.778144	0.420311	0.420311	0.306714	0.0624787	0.391912	3.28865	7651.08	22032.9	92.56	2255.54	106.65	179.34	635.39	300.18	41.93	727.29	425.98	200.11	34.41	7.29	835.5	1187.68	2023.18	4.53614	4.96398	8.9426	285.99	5.65596
2022-11-01	91.42	116.716	143.047	98.6826	2.69685	2.46308	1.11751	0.165346	0.701294	1.0947	0.575859	0.302184	0.370603	0.296482	0.125435	0.484634	2.45738	8049.86	25562.7	93.34	2350.72	85.49	189.62	610.32	282.92	44.99	771.48	421.25	208.08	33.69	7.3	818.4	1226.42	2044.82	4.51546	4.75975	8.99341	275.11	5.61717
2022-12-01	80.92	111.196	119.139	109.772	2.55409	2.28132	0.874093	0.16118	0.520736	1.03527	0.483541	0.24797	0.241771	0.24797	0.0495939	0.254169	2.21313	8375.4	28946.8	111.84	2401.69	79.7	201.46	633.21	294.48	49.77	887.56	461.37	228.32	45.28	7.8	861.53	1394.21	2255.74	4.39346	4.71129	9.03305	281.16	5.63892
2023-01-01	82.5	104.267	113.021	94.6299	2.40713	1.97119	0.669699	0.0442254	0.897144	1.08036	0.562295	0.233763	0.290624	0.195855	0.132676	0.240081	1.94592	9037.95	28194.6	122.23	2501.82	89.14	210.15	643.61	289.87	46.71	812.13	442.12	229.45	41.53	7.74	873.06	1295.78	2168.84	4.4128	4.64696	9.10919	299.29	5.70141
2023-02-01	82.59	120.994	147.05	103.029	2.97532	2.30153	1.48766	0.140093	0.800534	1.04736	0.740494	0.253502	0.333556	0.293529	0.06004	0.486991	2.02802	8936.59	26728	127.6	2416.18	97.89	192.72	610.87	269.33	43.86	775.62	415.34	204.97	35.45	7.07	815.84	1226.41	2042.25	4.41389	4.79574	9.09791	290.61	5.67198
2023-03-01	78.43	105.38	125.086	86.754	2.62413	2.04623	1.40936	0.365609	0.636868	0.908126	0.418681	0.247671	0.359712	0.30664	0.0412785	0.218186	2.00495	8856.31	23288.6	128.37	2296.42	124.92	209.16	678.57	290.45	46.34	809.17	439.08	213.99	30.96	7.7	892.56	1279.21	2171.77	4.36221	4.65757	9.08889	334.08	5.81138
2023-04-01	84.64	106.81	118.167	93.2484	2.44488	1.80934	1.22568	0.415045	0.609598	0.985733	0.583658	0.376135	0.36965	0.246433	0.175097	0.278859	1.69261	8809.42	23894.6	117.39	2343.23	135.78	201.71	665.47	278.6	41.96	724.41	393.87	198.81	27.91	7.42	864.28	1146.19	2010.47	4.43841	4.67105	9.08358	337.49	5.82154
2023-05-01	75.47	108.468	122.472	92.7594	2.50818	1.90234	1.08445	0.333212	0.617957	1.0784	0.533139	0.502847	0.296862	0.315037	0.205986	0.357446	1.76905	8217.47	21970.4	105.15	2268.6	152.88	184.62	698.06	310.73	42.41	749.52	424.72	201.11	30.41	7.42	899.17	1204.65	2103.82	4.32374	4.68645	9.01402	337.5	5.82157
2023-06-01	74.84	110.529	129.407	95.2789	2.45887	2.2142	1.05817	0.207964	0.69729	1.1071	0.458744	0.195731	0.293596	0.263013	0.073399	0.159031	2.12857	8396.52	21233.3	113.45	2184.75	158.42	152.33	674.91	314.55	42.53	812.12	465.96	206.43	30.6	7.08	881.34	1308.68	2190.02	4.31535	4.70528	9.03557	310.75	5.73899
2023-07-01	80.11	107.449	123.809	91.768	2.48386	2.08023	0.974913	0.0931446	0.707899	1.02459	0.527819	0.260805	0.384998	0.211128	0.105564	0.478142	1.82563	8476.68	21091.3	114.43	2159.73	160.9	172.94	731.64	343.48	47.19	915.62	530.76	220.74	33.53	7.13	952.38	1479.91	2432.29	4.3834	4.67701	9.04507	333.84	5.81066
2023-08-01	86.15	101.141	117.609	83.605	2.15993	1.96578	0.988958	0.266958	0.479311	1.1103	0.570319	0.230555	0.248756	0.315496	0.115277	0.32763	1.64422	8349.13	20438.7	110.2	2136.57	160.82	150.55	744.34	378.36	47.45	910.08	535.41	220.99	34.09	7.16	965.33	1479.58	2444.91	4.45609	4.61652	9.02991	311.37	5.74098
2023-09-01	93.72	98.6348	125.652	68.4659	2.22034	1.90574	1.08295	0.248049	0.453748	1.17974	0.556597	0.272249	0.502148	0.459798	0.1089	0.387198	1.65769	8276.71	19644.6	120.98	2184.67	146.7	153.34	694.48	343.71	43.61	798.11	475.44	211.5	33	7.12	905.98	1306.55	2212.53	4.54031	4.59142	9.0212	300.04	5.70392
2023-10-01	90.6	197.887	205.04	221.804	4.42467	1.83914	1.03899	0.794172	0.794172	2.23324	0.859855	0.24482	0.268705	0.220935	0.0895683	0.406043	1.70777	7937.18	18281.2	118.97	2192.21	137.11	188.14	696.61	320.71	43.19	767.22	436.57	211.46	30.73	7.46	908.07	1234.52	2142.59	4.50645	5.2877	8.97931	325.25	5.78459
2023-11-01	82.94	156.696	143.494	189.554	3.7299	1.27042	0.919957	0.294136	0.325427	1.44565	0.563239	0.319169	0.275361	0.250329	0.0813568	0.225296	1.22035	8189.59	17027.4	131.07	2202.26	114.66	226.88	688.43	293.24	46.32	797.11	427.75	213.07	29.74	7.33	901.5	1254.6	2156.1	4.41812	5.05431	9.01062	341.54	5.83346
2023-12-01	77.63	142.279	136.178	173.964	3.4243	1.49974	0.701596	0.276777	0.514933	1.60917	0.69516	0.180227	0.15448	0.225283	0.07724	0.21241	1.3517	8399.94	16460.8	137.05	2182.43	105.64	236.07	700.49	299.45	51.74	909.65	456.64	232.45	36.05	7.59	932.94	1402.34	2335.28	4.35195	4.95779	9.03598	341.71	5.83396
2024-01-01	80.12	160.374	140.836	208.471	3.85194	1.5533	0.970813	0.563698	0.538645	1.87899	0.632594	0.250532	0.344482	0.275586	0.0563698	0.344482	1.49067	8338.88	16103.8	135.82	2192.82	114.44	220.79	693.46	300.62	49.88	875.58	487.02	232.44	38.37	7.73	925.9	1400.97	2326.87	4.38353	5.07751	9.02868	335.23	5.81482
2024-02-01	83.48	146.598	140.245	171.181	3.39593	1.72087	0.7721	0.281358	0.706668	1.64889	0.75247	0.143951	0.157037	0.215926	0.0850618	0.248642	1.51148	8304.95	16338.5	124.39	2179.46	122.83	218.31	675.7	280.02	47.36	822.8	424.84	215.07	33.59	7.18	890.77	1281.23	2172	4.42461	4.9877	9.02461	341.14	5.83229
2024-03-01	85.41	133.213	121.54	151.814	2.94443	1.57979	0.879026	0.196705	0.657733	1.38923	0.76838	0.141382	0.27047	0.239734	0.0737644	0.233587	1.48144	8689.13	17438.8	109.79	2226.16	162.71	226.96	743.44	298.94	47.44	806.63	437.74	215.2	31.71	7.39	958.64	1276.08	2234.72	4.44746	4.89195	9.06983	389.67	5.9653
2024-04-01	89.94	163.947	170.698	165.991	4.01873	1.829	1.04424	0.39238	0.721473	1.99987	0.822733	0.284792	0.265806	0.24682	0.0949307	0.253149	1.67078	9464.43	18164	112.75	2506.1	177.43	217.22	746.94	302.03	42.99	734.46	394.81	202.36	27.62	7.27	949.3	1156.89	2106.19	4.49914	5.09955	9.1553	394.65	5.978
2024-05-01	81.75	130.522	131.447	133.154	3.10741	1.71886	0.935894	0.256912	0.477123	1.25398	0.636163	0.177392	0.263029	0.134573	0.0489356	0.177392	1.52924	10139.3	19587	118.88	2564.54	204.24	193.39	799.5	350.98	43.51	746.36	430.66	210.95	31.16	7.38	1010.45	1208.18	2218.63	4.40367	4.87154	9.22418	397.63	5.98552
2024-06-01	82.25	113.093	125.713	109.738	2.68831	1.47096	0.893989	0.152168	0.450165	1.22369	0.7228	0.259954	0.342379	0.190211	0.0760842	0.171189	1.26807	9648.17	17498	107.45	2497.61	203.17	183.91	812.51	374.85	43.42	786.63	467.77	212.07	31.6	7.16	1024.58	1286	2310.58	4.40976	4.72821	9.17452	387.08	5.95863
2024-07-01	85.15	92.3949	95.1603	95.1103	2.09385	0.991501	0.732849	0.141643	0.431088	1.0654	0.468038	0.160118	0.19091	0.160118	0.0739007	0.147801	0.874492	9385.31	16334.9	106.85	2349.13	208.73	178.74	849.53	406.96	47.8	889.24	538.6	227.74	34.18	7.3	1077.27	1462.02	2539.29	4.44441	4.52607	9.1469	387.47	5.95964
2024-08-01	80.36	140.975	124.805	165.179	3.20927	1.55083	0.639321	0.259527	0.424104	1.58881	0.651981	0.101279	0.170908	0.227877	0.145588	0.221547	1.33561	8971.96	16292.1	99.91	2343.67	214.92	162.09	820.66	387.27	49.08	917.62	541.33	227.94	33.91	7.3	1048.6	1492.86	2541.46	4.38652	4.94858	9.10186	377.01	5.93227
2024-09-01	74.02	130.359	134.037	135.555	2.97313	1.44428	0.767679	0.149632	0.494438	1.63945	0.787197	0.208184	0.273242	0.16915	0.110598	0.273242	1.30115	9237.48	16076.7	92.83	2449.92	183.26	188.84	752.91	327.27	46.35	825.64	479.3	211.16	33.8	7.19	964.07	1338.74	2302.81	4.30434	4.87029	9.13102	372.1	5.91916
2024-10-01	75.63	130.689	128.41	142.818	3.02955	1.36639	0.976876	0.302955	0.550266	1.45295	0.64919	0.216397	0.395697	0.265859	0.0865587	0.278224	1.10053	9533.99	16765.8	101.39	2595.58	169.83	211.78	744.7	310.61	45.21	768.87	446.72	213.28	32.8	7.27	957.98	1248.39	2206.37	4.32585	4.87282	9.16262	381.61	5.9444
2024-11-01	74.35	128.902	139.149	127.429	3.16731	1.97091	1.00749	0.214092	0.698948	1.51754	0.686355	0.195202	0.850072	0.182608	0.214092	0.277061	1.7883	9075.73	15723.1	100.5	2582.19	143.15	218.54	697.52	281.62	46.87	797.35	449.23	217.8	31.69	7.34	915.32	1278.27	2193.59	4.30878	4.85905	9.11336	361.69	5.89079
2024-12-01	73.86	142.366	128.262	164.814	3.28952	2.29501	0.841505	0.340775	0.535503	1.53001	0.549412	0.208638	0.535503	0.194728	0.0904096	1.19619	1.54392	8916.32	15444.9	102.21	2541.02	142.41	247.8	746.05	296.2	51.73	902.01	466.84	246.76	36.31	7.91	992.81	1405.16	2397.97	4.30217	4.9584	9.09564	390.21	5.96669
2025-01-01	79.27	113.233	117.086	109.505	2.74581	1.12584	0.856893	0.243933	0.531649	1.30098	0.625469	0.137603	0.350263	0.237678	0.187641	0.206405	0.8006					159.13	239.98	752.79	296.84	48.94	849.45	480.08	244.37	38.68	7.9	997.16	1368.21	2365.37	4.37286	4.72945		399.11	5.98924
2025-02-01	75.44	136.981	138.768	140.787	3.53607	1.95326	1.1046	0.687007	1.14501	1.76467	1.03051	0.17512	0.330033	0.208796	0.0471476	0.289621	1.75793					165.63	214.09	715.02	281.81	46.28	813.9	435.01	216.78	35.22	7.21	931.8	1284.13	2215.93	4.32334	4.91984		379.72	5.93943
2025-03-01	72.73	174.112	194.024	158.235	4.46354	2.45999	1.07884	0.794309	0.936574	2.51926	1.32187	0.290456	0.385299	0.243035	0.0948429	0.337878	2.23474					214.04	250.28	811.84	293.29	46.4	815.06	421.3	229.14	29.06	7.83	1040.98	1265.42	2306.4	4.28675	5.1597		464.32	6.14057
2025-04-01	68.13	140.974	159.257	132.056	3.51856	1.52269	1.05557	0.260859	0.612715	1.51056	0.764378	0.321524	0.315457	0.424654	0.10313	0.272992	1.29216					239.86	224.65	804.47	289.76	42.63	727	390.42	208.91	28.61	7.57	1013.38	1146.03	2159.41	4.22142	4.94857		464.51	6.14098
2025-05-01	64.45	166.047	203.877	149.212	4.10839	1.49236	1.12951	0.696436	0.673026	1.99567	1.01832	0.16972	0.31603	0.760812	0.0702288	0.690583	1.38702					255.96	219.29	851.23	325.25	43.23	737.96	381.39	209.61	26.18	7.5	1060.84	1145.53	2206.37	4.16589	5.11227		475.25	6.16384
2025-06-01	71.44	221.135	286.439	182.075	5.63809	2.16945	1.39243	0.453783	0.919998	2.74756	1.10027	0.385404	0.416485	0.466215	0.093243	0.658917	1.7654					268.43	204.46	884.86	361.15	43.59	783.35	417.83	213.26	27.54	7.23	1098.12	1228.72	2326.84	4.26886	5.39877		472.89	6.15886
2025-07-01	71.04	134.222	156.11	119.332	3.16876	1.39425	0.899324	0.205215	0.657895	1.62361	0.712216	0.307822	0.350072	0.356108	0.102607	0.356108	1.21318					283.54	198.88	917.75	378.19	50	918.87	490.36	229.32	25.3	7.14	1147.07	1434.53	2581.6	4.26324	4.8995		482.42	6.17882
2025-08-01	67.87	138.562	160.415	120.88	3.38875	1.70077	0.805627	0.179028	0.914322	1.70716	0.971867	0.28133	0.268542	0.473146	0.108696	0.249361	1.5665					274.19	180.52	876.45	364.16	50.28	930.63	479.5	225.44	24.92	7.3	1101.89	1435.05	2536.94	4.21759	4.93132		454.71	6.11966
2025-09-01	67.99	125.87	141.806	114.789	3.10908	1.43044	1.00588	0.254735	0.679295	1.4435	0.901372	0.189419	0.241672	0.404964	0.0914435	0.280862	1.1953					237.07	191.4	843.57	362.67	45.45	800.76	428.38	212.04	23.92	6.98	1055.61	1253.06	2308.67	4.21936	4.83525		428.47	6.06022
2025-10-01	64.54	154.513	167.998	151.549	3.75258	1.51354	0.944399	0.225155	0.544124	1.40722	0.569141	0.287698	0.325224	0.287698	0.13134	0.506598	1.20708					201.22	222.49	812.55	336.02	45.65	784.07	417.92	211.32	24.75	7.17	1023.87	1226.74	2250.61	4.16729	5.04028		423.71	6.04905
2025-11-01	63.8	104.339	118.682	88.6862	2.6582	1.28825	0.64727	0.201093	0.546723	0.999183	0.546723	0.157104	0.201093	0.188525	0.0879784	0.314209	0.992899					183.98	254.82	780.13	286.8	47.52	760.84	406.75	219.43	23.36	7.01	999.56	1190.95	2190.51	4.15575	4.64764		438.8	6.08404
2025-12-01	62.54	130.956	144.906	121.789	3.21967	1.67213	1.00328	0.15082	0.695082	1.28525	0.668852	0.262295	0.203279	0.314754	0.0918033	0.242623	1.35082					175.37	265.27	794.61	294.12	52.13	879.61	450.62	247.54	25.9	7.72	1042.15	1356.13	2398.28	4.13581	4.87486		440.64	6.08823
2026-01-01	66.6	168.63	220.171	100.222	4.56638	1.9037	1.50554	0.335946	0.665671	1.89125	0.926963	0.323504	0.211522	0.329725	0.180416	0.373274	1.19448					185.89	259.99	793.52	289.15	50.62	835.12	453.33	241.69	28.64	7.87	1035.21	1317.09	2352.3	4.1987	5.12771		445.88	6.10005
2026-02-01	70.89	120.745	157.467	81.6798	3.10047	1.28636	0.883963	0.32324	0.448578	1.18082	0.560723	0.197902	0.230886	0.435385	0.0923544	0.369418	0.89056					186.65	236.14	753.78	275.95	47.88	788.58	381.62	209.48	23.24	7.16	963.26	1193.44	2156.7	4.26113	4.79368		422.79	6.04688
2026-03-01	103.13	326.989	316.379	445.254	8.58892	2.47791	1.68659	2.20643	1.40935	3.90458	1.93496	0.941489	0.779761	1.00503	0.179056	0.797089	2.0216					225.81	229.69	757.59	256.57	39.42	750.35	319.01	196.81	19.33	6.1	954.4	1088.69	2043.09	4.63599	5.78993		455.5	6.1214
2026-04-01	117.29	230.771	252.265	285.348	6.32998	1.71322	1.51369	0.811889	0.798129	2.3531	1.14903	0.48851	0.509151	0.584836	0.0756846	0.392184	1.28664					228.1	212.66	674.76	197.25	32.81	498.11	198.36	148.5	14.17	3.94	823.26	710.64	1533.9	4.76465	5.44142		440.76	6.0885

## Sheet: 06_OilRents
06 — World Bank oil rents (% GDP) — country×year
WB indicator NY.GDP.PETR.RT.ZS via OWID. Oil rents = (regional crude price − unit production cost) × physical quantity / GDP.
country	iso3	year	oil_rents_pct_gdp
Afghanistan	AFG	1970	0.0265663
Afghanistan	AFG	1971	0.0453108
Afghanistan	AFG	1972	0.0557664
Afghanistan	AFG	1973	0.0763342
Afghanistan	AFG	1974	0.427935
Afghanistan	AFG	1975	0.520411
Afghanistan	AFG	1976	0.646363
Afghanistan	AFG	1977	0.687945
Afghanistan	AFG	1978	0.644109
Afghanistan	AFG	1979	1.2935
Afghanistan	AFG	1980	1.35006
Afghanistan	AFG	1981	1.35475
Afghanistan	AFG	2002	0.0307893
Afghanistan	AFG	2003	0.0256328
Afghanistan	AFG	2004	0.0256052
Afghanistan	AFG	2005	0.0258476
Afghanistan	AFG	2006	0.021407
Afghanistan	AFG	2007	0.0144465
Afghanistan	AFG	2008	0.0157363
Afghanistan	AFG	2009	0.00524174
Afghanistan	AFG	2010	0.00514946
Afghanistan	AFG	2011	0.0066024
Afghanistan	AFG	2012	0.109824
Afghanistan	AFG	2013	0.0672902
Afghanistan	AFG	2014	0.0407439
Afghanistan	AFG	2015	0.0136358
Afghanistan	AFG	2016	0.00944508
Afghanistan	AFG	2017	0.0134271
Afghanistan	AFG	2018	0.0188544
Afghanistan	AFG	2019	0.0127773
Afghanistan	AFG	2020	0.00517762
Afghanistan	AFG	2021	0.0178695
Albania	ALB	1984	5.79911
Albania	ALB	1985	5.35721
Albania	ALB	1986	1.94987
Albania	ALB	1987	3.10408
Albania	ALB	1988	2.37854
Albania	ALB	1989	3.34559
Albania	ALB	1990	4.84588
Albania	ALB	1991	3.61748
Albania	ALB	1992	4.67814
Albania	ALB	1993	2.64924
Albania	ALB	1994	1.52228
Albania	ALB	1995	1.15952
Albania	ALB	1996	1.1607
Albania	ALB	1997	1.08836
Albania	ALB	1998	0.233495
Albania	ALB	1999	0.494725
Albania	ALB	2000	1.0715
Albania	ALB	2001	0.699922
Albania	ALB	2002	0.687178
Albania	ALB	2003	0.692723
Albania	ALB	2004	0.793153
Albania	ALB	2005	1.02095
Albania	ALB	2006	1.19245
Albania	ALB	2007	1.24943
Albania	ALB	2008	1.60465
Albania	ALB	2009	0.92366
Albania	ALB	2010	1.30954
Albania	ALB	2011	2.45489
Albania	ALB	2012	2.86635
Albania	ALB	2013	3.03392
Albania	ALB	2014	3.12208
Albania	ALB	2015	1.45261
Albania	ALB	2016	0.884411
Albania	ALB	2017	1.12614
Albania	ALB	2018	1.46983
Albania	ALB	2019	1.42437
Albania	ALB	2020	0.582226
Albania	ALB	2021	1.04218
Algeria	DZA	1970	7.1619
Algeria	DZA	1971	6.99098
Algeria	DZA	1972	9.0139
Algeria	DZA	1973	10.8416
Algeria	DZA	1974	27.7199
Algeria	DZA	1975	22.6333
Algeria	DZA	1976	23.72
Algeria	DZA	1977	23.1641
Algeria	DZA	1978	20.1203
Algeria	DZA	1979	36.9395
Algeria	DZA	1980	30.417
Algeria	DZA	1981	24.514
Algeria	DZA	1982	18.3348
Algeria	DZA	1983	16.5358
Algeria	DZA	1984	15.4491
Algeria	DZA	1985	14.2828
Algeria	DZA	1986	5.87029
Algeria	DZA	1987	8.53319
Algeria	DZA	1988	8.00223
Algeria	DZA	1989	12.5689
Algeria	DZA	1990	15.797
Algeria	DZA	1991	13.5418
Algeria	DZA	1992	13.0452
Algeria	DZA	1993	11.7164
Algeria	DZA	1994	12.6865
Algeria	DZA	1995	14.1775
Algeria	DZA	1996	16.3136
Algeria	DZA	1997	14.7901
Algeria	DZA	1998	9.01756
Algeria	DZA	1999	12.9557
Algeria	DZA	2000	20.2039
Algeria	DZA	2001	16.7198
Algeria	DZA	2002	17.7037
Algeria	DZA	2003	19.6786
Algeria	DZA	2004	22.127
Algeria	DZA	2005	27.9141
Algeria	DZA	2006	29.5344
Algeria	DZA	2007	27.9267
Algeria	DZA	2008	29.1086
Algeria	DZA	2009	19.9046
Algeria	DZA	2010	21.994
Algeria	DZA	2011	25.026
Algeria	DZA	2012	22.6025
Algeria	DZA	2013	20.8724
Algeria	DZA	2014	19.3167
Algeria	DZA	2015	11.7459
Algeria	DZA	2016	10.0262
Algeria	DZA	2017	12.1566
Algeria	DZA	2018	15.9428
Algeria	DZA	2019	14.1421
Algeria	DZA	2020	9.03841
Algeria	DZA	2021	14.4616
American Samoa	ASM	2002	0
American Samoa	ASM	2003	0
American Samoa	ASM	2004	0
American Samoa	ASM	2005	0
American Samoa	ASM	2006	0
American Samoa	ASM	2007	0
American Samoa	ASM	2008	0
American Samoa	ASM	2009	0
American Samoa	ASM	2010	0
American Samoa	ASM	2011	0
American Samoa	ASM	2012	0
American Samoa	ASM	2013	0
American Samoa	ASM	2014	0
American Samoa	ASM	2015	0
American Samoa	ASM	2016	0
American Samoa	ASM	2017	0
American Samoa	ASM	2018	0
American Samoa	ASM	2019	0
American Samoa	ASM	2020	0
American Samoa	ASM	2021	0
Angola	AGO	1980	19.5416
Angola	AGO	1981	10.4262
Angola	AGO	1982	4.09463
Angola	AGO	1983	11.2193
Angola	AGO	1984	14.0995
Angola	AGO	1985	14.1586
Angola	AGO	1986	6.31853
Angola	AGO	1987	15.1708
Angola	AGO	1988	14.4046
Angola	AGO	1989	21.8826
Angola	AGO	1990	28.0268
Angola	AGO	1991	16.8761
Angola	AGO	1992	27.0257
Angola	AGO	1993	34.5185
Angola	AGO	1994	40.5755
Angola	AGO	1995	41.0188
Angola	AGO	1996	39.0741
Angola	AGO	1997	37.349
Angola	AGO	1998	21.7477
Angola	AGO	1999	38.5243
Angola	AGO	2000	57.5135
Angola	AGO	2001	42.5916
Angola	AGO	2002	31.761
Angola	AGO	2003	27.1163
Angola	AGO	2004	32.9627
Angola	AGO	2005	42.2207
Angola	AGO	2006	40.2787
Angola	AGO	2007	45.3976
Angola	AGO	2008	52.1014
Angola	AGO	2009	29.7783
Angola	AGO	2010	37.7085
Angola	AGO	2011	38.6184
Angola	AGO	2012	34.3328
Angola	AGO	2013	29.0015
Angola	AGO	2014	21.7366
Angola	AGO	2015	12.7187
Angola	AGO	2016	19.7484
Angola	AGO	2017	24.711
Angola	AGO	2018	30.7304
Angola	AGO	2019	27.5048
Angola	AGO	2020	18.572
Angola	AGO	2021	28.2744
Antigua and Barbuda	ATG	1980	0
Antigua and Barbuda	ATG	1981	0
Antigua and Barbuda	ATG	1982	0
Antigua and Barbuda	ATG	1983	0
Antigua and Barbuda	ATG	1984	0
Antigua and Barbuda	ATG	1985	0
Antigua and Barbuda	ATG	1986	0
Antigua and Barbuda	ATG	1987	0
Antigua and Barbuda	ATG	1988	0
Antigua and Barbuda	ATG	1989	0
Antigua and Barbuda	ATG	1990	0
Antigua and Barbuda	ATG	1991	0
Antigua and Barbuda	ATG	1992	0
Antigua and Barbuda	ATG	1993	0
Antigua and Barbuda	ATG	1994	0
Antigua and Barbuda	ATG	1995	0
Antigua and Barbuda	ATG	1996	0
Antigua and Barbuda	ATG	1997	0
Antigua and Barbuda	ATG	1998	0
Antigua and Barbuda	ATG	1999	0
Antigua and Barbuda	ATG	2000	0
Antigua and Barbuda	ATG	2001	0
Antigua and Barbuda	ATG	2002	0
Antigua and Barbuda	ATG	2003	0
Antigua and Barbuda	ATG	2004	0
Antigua and Barbuda	ATG	2005	0
Antigua and Barbuda	ATG	2006	0
Antigua and Barbuda	ATG	2007	0
Antigua and Barbuda	ATG	2008	0
Antigua and Barbuda	ATG	2009	0
Antigua and Barbuda	ATG	2010	0
Antigua and Barbuda	ATG	2011	0
Antigua and Barbuda	ATG	2012	0
Antigua and Barbuda	ATG	2013	0
Antigua and Barbuda	ATG	2014	0
Antigua and Barbuda	ATG	2015	0
Antigua and Barbuda	ATG	2016	0
Antigua and Barbuda	ATG	2017	0
Antigua and Barbuda	ATG	2018	0
Antigua and Barbuda	ATG	2019	0
Antigua and Barbuda	ATG	2020	0
Antigua and Barbuda	ATG	2021	0
Argentina	ARG	1970	0.183779
Argentina	ARG	1971	0.312887
Argentina	ARG	1972	0.359047
Argentina	ARG	1973	0.412805
Argentina	ARG	1974	1.65886
Argentina	ARG	1975	2.1189
Argentina	ARG	1976	2.35967
Argentina	ARG	1977	1.93385
Argentina	ARG	1978	2.1902
Argentina	ARG	1979	5.02864
Argentina	ARG	1980	5.84241
Argentina	ARG	1981	4.79627
Argentina	ARG	1982	2.64858
Argentina	ARG	1983	2.932
Argentina	ARG	1984	3.68571
Argentina	ARG	1985	3.00657
Argentina	ARG	1986	0.971463
Argentina	ARG	1987	1.54851
Argentina	ARG	1988	1.07039
Argentina	ARG	1989	2.73925
Argentina	ARG	1990	2.18272
Argentina	ARG	1991	0.893993
Argentina	ARG	1992	0.91149
Argentina	ARG	1993	0.901893
Argentina	ARG	1994	0.88221
Argentina	ARG	1995	1.11368
Argentina	ARG	1996	1.42093
Argentina	ARG	1997	1.27159
Argentina	ARG	1998	0.676255
Argentina	ARG	1999	1.18223
Argentina	ARG	2000	2.03921
Argentina	ARG	2001	1.57829
Argentina	ARG	2002	4.58801
Argentina	ARG	2003	3.79526
Argentina	ARG	2004	3.62815
Argentina	ARG	2005	4.36083
Argentina	ARG	2006	4.49089
Argentina	ARG	2007	3.70578
Argentina	ARG	2008	4.039
Argentina	ARG	2009	2.12453
Argentina	ARG	2010	2.30522
Argentina	ARG	2011	2.74533
Argentina	ARG	2012	2.5565
Argentina	ARG	2013	2.25387
Argentina	ARG	2014	2.09271
Argentina	ARG	2015	0.693912
Argentina	ARG	2016	0.549552
Argentina	ARG	2017	0.663566
Argentina	ARG	2018	1.31095
Argentina	ARG	2019	1.291
Argentina	ARG	2020	0.677056
Argentina	ARG	2021	1.54438
Armenia	ARM	1990	0
Armenia	ARM	1991	0
Armenia	ARM	1992	0
Armenia	ARM	1993	0
Armenia	ARM	1994	0
Armenia	ARM	1995	0
Armenia	ARM	1996	0
Armenia	ARM	1997	0
Armenia	ARM	1998	0
Armenia	ARM	1999	0
Armenia	ARM	2000	0
Armenia	ARM	2001	0
Armenia	ARM	2002	0
Armenia	ARM	2003	0
Armenia	ARM	2004	0
Armenia	ARM	2005	0
Armenia	ARM	2006	0
Armenia	ARM	2007	0
Armenia	ARM	2008	0
Armenia	ARM	2009	0
Armenia	ARM	2010	0
Armenia	ARM	2011	0
Armenia	ARM	2012	0
Armenia	ARM	2013	0
Armenia	ARM	2014	0
Armenia	ARM	2015	0
Armenia	ARM	2016	0
Armenia	ARM	2017	0
Armenia	ARM	2018	0
Armenia	ARM	2019	0
Armenia	ARM	2020	0
Armenia	ARM	2021	0
Aruba	ABW	1986	0
Aruba	ABW	1987	0
Aruba	ABW	1988	0
Aruba	ABW	1989	0
Aruba	ABW	1990	0
Aruba	ABW	1991	0
Aruba	ABW	1992	0
Aruba	ABW	1993	0
Aruba	ABW	1994	0
Aruba	ABW	1995	0
Aruba	ABW	1996	0
Aruba	ABW	1997	0
Aruba	ABW	1998	0
Aruba	ABW	1999	0
Aruba	ABW	2000	0.000959489
Aruba	ABW	2001	0.000698232
Aruba	ABW	2002	0.000720703
Aruba	ABW	2003	0.000760651
Aruba	ABW	2004	0.000906167
Aruba	ABW	2005	0.00131405
Aruba	ABW	2006	0.00152577
Aruba	ABW	2007	0.00153974
Aruba	ABW	2008	0.0019564
Aruba	ABW	2009	0.0010943
Aruba	ABW	2010	0.00156961
Aruba	ABW	2011	0.0019269
Aruba	ABW	2012	0.00149031
Aruba	ABW	2013	0
Aruba	ABW	2014	0
Aruba	ABW	2015	0
Aruba	ABW	2016	0
Aruba	ABW	2017	0
Aruba	ABW	2018	0
Aruba	ABW	2019	0
Aruba	ABW	2020	0
Aruba	ABW	2021	0
Australia	AUS	1970	0.015371
Australia	AUS	1971	0.0253198
Australia	AUS	1972	0.0772457
Australia	AUS	1973	0.248096
Australia	AUS	1974	1.24983
Australia	AUS	1975	1.31205
Australia	AUS	1976	1.35847
Australia	AUS	1977	1.51714
Australia	AUS	1978	1.35918
Australia	AUS	1979	2.93105
Australia	AUS	1980	2.80223
Australia	AUS	1981	1.90662
Australia	AUS	1982	1.14393
Australia	AUS	1983	1.42608
Australia	AUS	1984	1.57388
Australia	AUS	1985	1.90783
Australia	AUS	1986	0.912782
Australia	AUS	1987	1.29743
Australia	AUS	1988	0.775504
Australia	AUS	1989	0.794335
Australia	AUS	1990	1.18928
Australia	AUS	1991	0.64565
Australia	AUS	1992	0.613094
Australia	AUS	1993	0.610539
Australia	AUS	1994	0.467145
Australia	AUS	1995	0.472621
Australia	AUS	1996	0.491721
Australia	AUS	1997	0.390188
Australia	AUS	1998	0.21486
Australia	AUS	1999	0.302021
Australia	AUS	2000	0.876745
Australia	AUS	2001	0.720453
Australia	AUS	2002	0.803941
Australia	AUS	2003	0.757626
Australia	AUS	2004	0.73789
Australia	AUS	2005	0.887355
Australia	AUS	2006	0.865992
Australia	AUS	2007	0.871982
Australia	AUS	2008	0.935961
Australia	AUS	2009	0.553069
Australia	AUS	2010	0.706854
Australia	AUS	2011	0.877829
Australia	AUS	2012	0.679386
Australia	AUS	2013	0.538516
Australia	AUS	2014	0.488872
Australia	AUS	2015	0.197899
Australia	AUS	2016	0.173169
Australia	AUS	2017	0.198665
Australia	AUS	2018	0.264745
Australia	AUS	2019	0.229199
Australia	AUS	2020	0.108189
Australia	AUS	2021	0.264201
Austria	AUT	1970	0.013384
Austria	AUT	1971	0.0396657
Austria	AUT	1972	0.0460995
Austria	AUT	1973	0.0657208
Austria	AUT	1974	0.290971
Austria	AUT	1975	0.21297
Austria	AUT	1976	0.204522
Austria	AUT	1977	0.165236
Austria	AUT	1978	0.141544
Austria	AUT	1979	0.280504
Austria	AUT	1980	0.266774
Austria	AUT	1981	0.223363
Austria	AUT	1982	0.135194
Austria	AUT	1983	0.170274
Austria	AUT	1984	0.175664
Austria	AUT	1985	0.168062
Austria	AUT	1986	0.0454156
Austria	AUT	1987	0.0557036
Austria	AUT	1988	0.0443388
Austria	AUT	1989	0.0700211
Austria	AUT	1990	0.0765119
Austria	AUT	1991	0.0396874
Austria	AUT	1992	0.035268
Austria	AUT	1993	0.0340668
Austria	AUT	1994	0.02709
Austria	AUT	1995	0.0240557
Austria	AUT	1996	0.0328502
Austria	AUT	1997	0.0280352
Austria	AUT	1998	0.00837487
Austria	AUT	1999	0.0262923
Austria	AUT	2000	0.0610377
Austria	AUT	2001	0.0440884
Austria	AUT	2002	0.0420534
Austria	AUT	2003	0.039205
Austria	AUT	2004	0.0485367
Austria	AUT	2005	0.0604957
Austria	AUT	2006	0.0662744
Austria	AUT	2007	0.05869
Austria	AUT	2008	0.0884445
Austria	AUT	2009	0.0534302
Austria	AUT	2010	0.0599149
Austria	AUT	2011	0.073846
Austria	AUT	2012	0.0843342
Austria	AUT	2013	0.0749502
Austria	AUT	2014	0.076914
Austria	AUT	2015	0.0340777
Austria	AUT	2016	0.0232519
Austria	AUT	2017	0.0301638
Austria	AUT	2018	0.0426588
Austria	AUT	2019	0.0368255
Austria	AUT	2020	0.0172757
Austria	AUT	2021	0.0378038
Azerbaijan	AZE	1990	15.5492
Azerbaijan	AZE	1991	7.34653
Azerbaijan	AZE	1993	35.4573
Azerbaijan	AZE	1994	38.3122
Azerbaijan	AZE	1995	20.0872
Azerbaijan	AZE	1996	21.6088
Azerbaijan	AZE	1997	15.0224
Azerbaijan	AZE	1998	4.88402
Azerbaijan	AZE	1999	17.01
Azerbaijan	AZE	2000	32.9457
Azerbaijan	AZE	2001	23.702
Azerbaijan	AZE	2002	23.2537
Azerbaijan	AZE	2003	23.651
Azerbaijan	AZE	2004	26.8344
Azerbaijan	AZE	2005	37.4466
Azerbaijan	AZE	2006	39.5813
Azerbaijan	AZE	2007	36.8683
Azerbaijan	AZE	2008	39.5008
Azerbaijan	AZE	2009	26.6788
Azerbaijan	AZE	2010	25.5154
Azerbaijan	AZE	2011	29.798
Azerbaijan	AZE	2012	25.8178
Azerbaijan	AZE	2013	22.5838
Azerbaijan	AZE	2014	20.2463
Azerbaijan	AZE	2015	12.0696
Azerbaijan	AZE	2016	12.7826
Azerbaijan	AZE	2017	17.1236
Azerbaijan	AZE	2018	24.1724
Azerbaijan	AZE	2019	20.4577
Azerbaijan	AZE	2020	11.1477
Azerbaijan	AZE	2021	20.9834
Bahamas	BHS	1980	0
Bahamas	BHS	1981	0
Bahamas	BHS	1982	0
Bahamas	BHS	1983	0
Bahamas	BHS	1984	0
Bahamas	BHS	1985	0
Bahamas	BHS	1986	0
Bahamas	BHS	1987	0
Bahamas	BHS	1988	0
Bahamas	BHS	1989	0
Bahamas	BHS	1990	0
Bahamas	BHS	1991	0
Bahamas	BHS	1992	0
Bahamas	BHS	1993	0
Bahamas	BHS	1994	0
Bahamas	BHS	1995	0
Bahamas	BHS	1996	0
Bahamas	BHS	1997	0
Bahamas	BHS	1998	0
Bahamas	BHS	1999	0
Bahamas	BHS	2000	0
Bahamas	BHS	2001	0
Bahamas	BHS	2002	0
Bahamas	BHS	2003	0
Bahamas	BHS	2004	0
Bahamas	BHS	2005	0
Bahamas	BHS	2006	0
Bahamas	BHS	2007	0
Bahamas	BHS	2008	0
Bahamas	BHS	2009	0
Bahamas	BHS	2010	0
Bahamas	BHS	2011	0
Bahamas	BHS	2012	0
Bahamas	BHS	2013	0
Bahamas	BHS	2014	0
Bahamas	BHS	2015	0
Bahamas	BHS	2016	0
Bahamas	BHS	2017	0
Bahamas	BHS	2018	0
Bahamas	BHS	2019	0
Bahamas	BHS	2020	0
Bahamas	BHS	2021	0
Bahrain	BHR	1980	68.1362
Bahrain	BHR	1981	58.0699
Bahrain	BHR	1982	33.7423
Bahrain	BHR	1983	29.0419
Bahrain	BHR	1984	31.8871
Bahrain	BHR	1985	30.4149
Bahrain	BHR	1986	23.3123
Bahrain	BHR	1987	30.0343
Bahrain	BHR	1988	23.1071
Bahrain	BHR	1989	31.1467
Bahrain	BHR	1990	37.0437
Bahrain	BHR	1991	20.4853
Bahrain	BHR	1992	20.7617
Bahrain	BHR	1993	17.958
Bahrain	BHR	1994	14.683
Bahrain	BHR	1995	15.246
Bahrain	BHR	1996	18.4494
Bahrain	BHR	1997	16.4187
Bahrain	BHR	1998	10.6377
Bahrain	BHR	1999	14.7941
Bahrain	BHR	2000	18.7111
Bahrain	BHR	2001	15.0074
Bahrain	BHR	2002	14.4907
Bahrain	BHR	2003	14.988
Bahrain	BHR	2004	16.653
Bahrain	BHR	2005	20.0931
Bahrain	BHR	2006	20.3671
Bahrain	BHR	2007	18.9906
Bahrain	BHR	2008	21.6816
Bahrain	BHR	2009	14.4351
Bahrain	BHR	2010	17.3156
Bahrain	BHR	2011	23.3981
Bahrain	BHR	2012	20.094
Bahrain	BHR	2013	20.866
Bahrain	BHR	2014	18.8709
Bahrain	BHR	2015	9.82474
Bahrain	BHR	2016	7.6296
Bahrain	BHR	2017	8.93795
Bahrain	BHR	2018	11.3901
Bahrain	BHR	2019	9.84819
Bahrain	BHR	2020	6.69559
Bahrain	BHR	2021	10.9377
Bangladesh	BGD	1970	0.000599114
Bangladesh	BGD	1971	0.000854001
Bangladesh	BGD	1972	0.00105029
Bangladesh	BGD	1973	0.00102089
Bangladesh	BGD	1974	0.00396545
Bangladesh	BGD	1975	0.00276066
Bangladesh	BGD	1976	0.00578092
Bangladesh	BGD	1977	0.00631915
Bangladesh	BGD	1978	0.00424575
Bangladesh	BGD	1979	0.00775012
Bangladesh	BGD	1980	0.00626126
Bangladesh	BGD	1981	0.00492795
Bangladesh	BGD	1982	0.00355682
Bangladesh	BGD	1983	0.00967401
Bangladesh	BGD	1984	0.0150348
Bangladesh	BGD	1985	0.0149932
Bangladesh	BGD	1986	0.0076599
Bangladesh	BGD	1987	0.0101507
Bangladesh	BGD	1988	0.0077473
Bangladesh	BGD	1989	0.00978772
Bangladesh	BGD	1990	0.0203201
Bangladesh	BGD	1991	0.0113715
Bangladesh	BGD	1992	0.0140449
Bangladesh	BGD	1993	0.0123153
Bangladesh	BGD	1994	0.0172049
Bangladesh	BGD	1995	0.0131965
Bangladesh	BGD	1996	0.017801
Bangladesh	BGD	1997	0.0173309
Bangladesh	BGD	1998	0.00801046
Bangladesh	BGD	1999	0.0179507
Bangladesh	BGD	2000	0.0353231
Bangladesh	BGD	2001	0.054371
Bangladesh	BGD	2002	0.0837501
Bangladesh	BGD	2003	0.0708422
Bangladesh	BGD	2004	0.0886657
Bangladesh	BGD	2005	0.0854315
Bangladesh	BGD	2006	0.101111
Bangladesh	BGD	2007	0.146631
Bangladesh	BGD	2008	0.207603
Bangladesh	BGD	2009	0.0809215
Bangladesh	BGD	2010	0.110401
Bangladesh	BGD	2011	0.148238
Bangladesh	BGD	2012	0.165239
Bangladesh	BGD	2013	0.136548
Bangladesh	BGD	2014	0.0959582
Bangladesh	BGD	2015	0.0516183
Bangladesh	BGD	2016	0.031494
Bangladesh	BGD	2017	0.0460395
Bangladesh	BGD	2018	0.0613028
Bangladesh	BGD	2019	0.0401609
Bangladesh	BGD	2020	0.0164788
Bangladesh	BGD	2021	0.0315772
Barbados	BRB	1974	0.340187
Barbados	BRB	1975	0.321305
Barbados	BRB	1976	0.385736
Barbados	BRB	1977	0.335836
Barbados	BRB	1978	0.37952
Barbados	BRB	1979	0.864959
Barbados	BRB	1980	0.770106
Barbados	BRB	1981	0.417197
Barbados	BRB	1982	0.284683
Barbados	BRB	1983	0.529135
Barbados	BRB	1984	0.79182
Barbados	BRB	1985	0.768484
Barbados	BRB	1986	0.245552
Barbados	BRB	1987	0.323894
Barbados	BRB	1988	0.195489
Barbados	BRB	1989	0.250545
Barbados	BRB	1990	0.400106
Barbados	BRB	1991	0.215802
Barbados	BRB	1992	0.259968
Barbados	BRB	1993	0.22095
Barbados	BRB	1994	0.203753
Barbados	BRB	1995	0.23589
Barbados	BRB	1996	0.21516
Barbados	BRB	1997	0.163645
Barbados	BRB	1998	0.133788
Barbados	BRB	1999	0.26083
Barbados	BRB	2000	0.366976
Barbados	BRB	2001	0.233969
Barbados	BRB	2002	0.233346
Barbados	BRB	2003	0.216002
Barbados	BRB	2004	0.231209
Barbados	BRB	2005	0.344769
Barbados	BRB	2006	0.381789
Barbados	BRB	2007	0.337029
Barbados	BRB	2008	0.381152
Barbados	BRB	2009	0.19538
Barbados	BRB	2010	0.274996
Barbados	BRB	2011	0.446502
Barbados	BRB	2012	0.421755
Barbados	BRB	2013	0.345791
Barbados	BRB	2014	0.293288
Barbados	BRB	2015	0.105085
Barbados	BRB	2016	0.0786114
Barbados	BRB	2017	0.113958
Barbados	BRB	2018	0.193101
Barbados	BRB	2019	0.211318
Barbados	BRB	2020	0.118477
Barbados	BRB	2021	0.309363
Belarus	BLR	1990	1.44597
Belarus	BLR	1991	0.683546
Belarus	BLR	1992	0.678212
Belarus	BLR	1993	0.683699
Belarus	BLR	1994	0.662922
Belarus	BLR	1995	0.764552
Belarus	BLR	1996	0.962364
Belarus	BLR	1997	0.782137
Belarus	BLR	1998	0.225994
Belarus	BLR	1999	0.852061
Belarus	BLR	2000	1.78844
Belarus	BLR	2001	1.34865
Belarus	BLR	2002	1.17776
Belarus	BLR	2003	1.13172
Belarus	BLR	2004	1.17468
Belarus	BLR	2005	1.28297
Belarus	BLR	2006	1.21065
Belarus	BLR	2007	1.09295
Belarus	BLR	2008	1.19982
Belarus	BLR	2009	0.730287
Belarus	BLR	2010	0.772806
Belarus	BLR	2011	1.17085
Belarus	BLR	2012	1.04465
Belarus	BLR	2013	0.832271
Belarus	BLR	2014	0.734772
Belarus	BLR	2015	0.439126
Belarus	BLR	2016	0.386692
Belarus	BLR	2017	0.509193
Belarus	BLR	2018	0.814824
Belarus	BLR	2019	0.652175
Belarus	BLR	2020	0.365085
Belarus	BLR	2021	0.814106
Belgium	BEL	1971	0
Belgium	BEL	1972	0
Belgium	BEL	1973	0
Belgium	BEL	1974	0
Belgium	BEL	1975	0
Belgium	BEL	1976	0
Belgium	BEL	1977	0
Belgium	BEL	1978	0
Belgium	BEL	1979	0
Belgium	BEL	1980	0
Belgium	BEL	1981	0
Belgium	BEL	1982	0
Belgium	BEL	1983	0
Belgium	BEL	1984	0
Belgium	BEL	1985	0
Belgium	BEL	1986	0
Belgium	BEL	1987	0
Belgium	BEL	1988	0
Belgium	BEL	1989	0
Belgium	BEL	1990	0
Belgium	BEL	1991	0
Belgium	BEL	1992	0
Belgium	BEL	1993	0
Belgium	BEL	1994	0
Belgium	BEL	1995	0
Belgium	BEL	1996	0
Belgium	BEL	1997	0
Belgium	BEL	1998	0
Belgium	BEL	1999	0
Belgium	BEL	2000	0
Belgium	BEL	2001	0
Belgium	BEL	2002	0
Belgium	BEL	2003	0
Belgium	BEL	2004	0
Belgium	BEL	2005	5.7433e-05
Belgium	BEL	2006	0.00153504
Belgium	BEL	2007	0
Belgium	BEL	2008	0
Belgium	BEL	2009	0
Belgium	BEL	2010	0.0276859
Belgium	BEL	2011	0.0465608
Belgium	BEL	2012	0.0447324
Belgium	BEL	2013	0.0397729
Belgium	BEL	2014	0.0481188
Belgium	BEL	2015	0.015728
Belgium	BEL	2016	0.0115678
Belgium	BEL	2017	0.0205164
Belgium	BEL	2018	0.0292178
Belgium	BEL	2019	0.0271254
Belgium	BEL	2020	0.0147577
Belgium	BEL	2021	0.0312736
Belize	BLZ	1980	0
Belize	BLZ	1981	0
Belize	BLZ	1982	0
Belize	BLZ	1983	0
Belize	BLZ	1984	0
Belize	BLZ	1985	0
Belize	BLZ	1986	0
Belize	BLZ	1987	0
Belize	BLZ	1988	0
Belize	BLZ	1989	0
Belize	BLZ	1990	0
Belize	BLZ	1991	0
Belize	BLZ	1992	0
Belize	BLZ	1993	0
Belize	BLZ	1994	0
Belize	BLZ	1995	0
Belize	BLZ	1996	0
Belize	BLZ	1997	0
Belize	BLZ	1998	0
Belize	BLZ	1999	0
Belize	BLZ	2000	0
Belize	BLZ	2001	0
Belize	BLZ	2002	0
Belize	BLZ	2003	0
Belize	BLZ	2004	0
Belize	BLZ	2005	0.0302357
Belize	BLZ	2006	2.15647
Belize	BLZ	2007	2.8253
Belize	BLZ	2008	4.54726
Belize	BLZ	2009	2.97042
Belize	BLZ	2010	3.81366
Belize	BLZ	2011	5.39177
Belize	BLZ	2012	3.6162
Belize	BLZ	2013	2.37816
Belize	BLZ	2014	1.66822
Belize	BLZ	2015	0.501874
Belize	BLZ	2016	0.324173
Belize	BLZ	2017	0.383067
Belize	BLZ	2018	0.502365
Belize	BLZ	2019	0.336504
Belize	BLZ	2020	0.13564
Belize	BLZ	2021	0.280282
Benin	BEN	1971	0
Benin	BEN	1972	0
Benin	BEN	1973	0
Benin	BEN	1974	0
Benin	BEN	1975	0
Benin	BEN	1976	0
Benin	BEN	1977	0
Benin	BEN	1978	0
Benin	BEN	1979	0
Benin	BEN	1980	0
Benin	BEN	1981	1.48757
Benin	BEN	1982	0.504681
Benin	BEN	1983	1.54651
Benin	BEN	1984	2.61575
Benin	BEN	1985	3.00674
Benin	BEN	1986	0.848822
Benin	BEN	1987	1.48378
Benin	BEN	1988	1.04316
Benin	BEN	1989	1.58195
Benin	BEN	1990	1.57562
Benin	BEN	1991	0.817878
Benin	BEN	1992	1.41824
Benin	BEN	1993	1.00672
Benin	BEN	1994	1.17323
Benin	BEN	1995	0.542865
Benin	BEN	1996	0.395654
Benin	BEN	1997	0.303942
Benin	BEN	1998	0.101033
Benin	BEN	2004	0
Benin	BEN	2005	0
Benin	BEN	2006	0
Benin	BEN	2007	0
Benin	BEN	2008	0
Benin	BEN	2009	0
Benin	BEN	2010	0
Benin	BEN	2011	0
Benin	BEN	2012	0
Benin	BEN	2013	0
Benin	BEN	2014	0
Benin	BEN	2015	0.0533747
Benin	BEN	2016	0.0514774
Benin	BEN	2017	0.0874966
Benin	BEN	2018	0.116502
Benin	BEN	2019	0.0978873
Benin	BEN	2020	0.0451182
Benin	BEN	2021	0
Bermuda	BMU	1980	0
Bermuda	BMU	1981	0
Bermuda	BMU	1982	0
Bermuda	BMU	1983	0
Bermuda	BMU	1984	0
Bermuda	BMU	1985	0
Bermuda	BMU	1986	0
Bermuda	BMU	1987	0
Bermuda	BMU	1988	0
Bermuda	BMU	1989	0
Bermuda	BMU	1990	0
Bermuda	BMU	1991	0
Bermuda	BMU	1992	0
Bermuda	BMU	1993	0
Bermuda	BMU	1994	0
Bermuda	BMU	1995	0
Bermuda	BMU	1996	0
Bermuda	BMU	1997	0
Bermuda	BMU	1998	0
Bermuda	BMU	1999	0
Bermuda	BMU	2000	0
Bermuda	BMU	2001	0
Bermuda	BMU	2002	0
Bermuda	BMU	2003	0
Bermuda	BMU	2004	0
Bermuda	BMU	2005	0
Bermuda	BMU	2006	0
Bermuda	BMU	2007	0
Bermuda	BMU	2008	0
Bermuda	BMU	2009	0
Bermuda	BMU	2010	0
Bermuda	BMU	2011	0
Bermuda	BMU	2012	0
Bermuda	BMU	2013	0
Bermuda	BMU	2014	0
Bermuda	BMU	2015	0
Bermuda	BMU	2016	0
Bermuda	BMU	2017	0
Bermuda	BMU	2018	0
Bermuda	BMU	2019	0
Bermuda	BMU	2020	0
Bermuda	BMU	2021	0
Bhutan	BTN	1980	0
Bhutan	BTN	1981	0
Bhutan	BTN	1982	0
Bhutan	BTN	1983	0
Bhutan	BTN	1984	0
Bhutan	BTN	1985	0
Bhutan	BTN	1986	0
Bhutan	BTN	1987	0
Bhutan	BTN	1988	0
Bhutan	BTN	1989	0
Bhutan	BTN	1990	0
Bhutan	BTN	1991	0
Bhutan	BTN	1992	0
Bhutan	BTN	1993	0
Bhutan	BTN	1994	0
Bhutan	BTN	1995	0
Bhutan	BTN	1996	0
Bhutan	BTN	1997	0
Bhutan	BTN	1998	0
Bhutan	BTN	1999	0
Bhutan	BTN	2000	0
Bhutan	BTN	2001	0
Bhutan	BTN	2002	0
Bhutan	BTN	2003	0
Bhutan	BTN	2004	0
Bhutan	BTN	2005	0
Bhutan	BTN	2006	0
Bhutan	BTN	2007	0
Bhutan	BTN	2008	0
Bhutan	BTN	2009	0
Bhutan	BTN	2010	0
Bhutan	BTN	2011	0
Bhutan	BTN	2012	0
Bhutan	BTN	2013	0
Bhutan	BTN	2014	0
Bhutan	BTN	2015	0
Bhutan	BTN	2016	0
Bhutan	BTN	2017	0
Bhutan	BTN	2018	0
Bhutan	BTN	2019	0
Bhutan	BTN	2020	0
Bhutan	BTN	2021	0
Bolivia	BOL	1970	0.41465
Bolivia	BOL	1971	0.665714
Bolivia	BOL	1972	0.57115
Bolivia	BOL	1973	1.03096
Bolivia	BOL	1974	3.52258
Bolivia	BOL	1975	2.99141
Bolivia	BOL	1976	2.8708
Bolivia	BOL	1977	1.70014
Bolivia	BOL	1978	1.97464
Bolivia	BOL	1979	4.44939
Bolivia	BOL	1980	5.44751
Bolivia	BOL	1981	2.84129
Bolivia	BOL	1982	1.94975
Bolivia	BOL	1983	2.51905
Bolivia	BOL	1984	2.28482
Bolivia	BOL	1985	2.1477
Bolivia	BOL	1986	1.13382
Bolivia	BOL	1987	1.98032
Bolivia	BOL	1988	1.45643
Bolivia	BOL	1989	2.1409
Bolivia	BOL	1990	2.75362
Bolivia	BOL	1991	1.37366
Bolivia	BOL	1992	1.42097
Bolivia	BOL	1993	1.39374
Bolivia	BOL	1994	1.32064
Bolivia	BOL	1995	1.67539
Bolivia	BOL	1996	2.08267
Bolivia	BOL	1997	1.64557
Bolivia	BOL	1998	1.24033
Bolivia	BOL	1999	1.83148
Bolivia	BOL	2000	3.20072
Bolivia	BOL	2001	2.70191
Bolivia	BOL	2002	3.20143
Bolivia	BOL	2003	3.57841
Bolivia	BOL	2004	5.08868
Bolivia	BOL	2005	7.3308
Bolivia	BOL	2006	6.90511
Bolivia	BOL	2007	4.87483
Bolivia	BOL	2008	5.13359
Bolivia	BOL	2009	1.99902
Bolivia	BOL	2010	2.8112
Bolivia	BOL	2011	3.57882
Bolivia	BOL	2012	3.58583
Bolivia	BOL	2013	3.31839
Bolivia	BOL	2014	3.03332
Bolivia	BOL	2015	1.14025
Bolivia	BOL	2016	0.788115
Bolivia	BOL	2017	1.02987
Bolivia	BOL	2018	1.4499
Bolivia	BOL	2019	1.03032
Bolivia	BOL	2020	0.497346
Bolivia	BOL	2021	1.26335
Bosnia and Herzegovina	BIH	1994	0
Bosnia and Herzegovina	BIH	1995	0
Bosnia and Herzegovina	BIH	1996	0
Bosnia and Herzegovina	BIH	1997	0
Bosnia and Herzegovina	BIH	1998	0
Bosnia and Herzegovina	BIH	1999	0
Bosnia and Herzegovina	BIH	2000	0
Bosnia and Herzegovina	BIH	2001	0
Bosnia and Herzegovina	BIH	2002	0
Bosnia and Herzegovina	BIH	2003	0
Bosnia and Herzegovina	BIH	2004	0
Bosnia and Herzegovina	BIH	2005	0
Bosnia and Herzegovina	BIH	2006	0
Bosnia and Herzegovina	BIH	2007	0
Bosnia and Herzegovina	BIH	2008	0
Bosnia and Herzegovina	BIH	2009	0
Bosnia and Herzegovina	BIH	2010	0
Bosnia and Herzegovina	BIH	2011	0
Bosnia and Herzegovina	BIH	2012	0
Bosnia and Herzegovina	BIH	2013	0
Bosnia and Herzegovina	BIH	2014	0
Bosnia and Herzegovina	BIH	2015	0
Bosnia and Herzegovina	BIH	2016	0
Bosnia and Herzegovina	BIH	2017	0
Bosnia and Herzegovina	BIH	2018	0
Bosnia and Herzegovina	BIH	2019	0
Bosnia and Herzegovina	BIH	2020	0
Bosnia and Herzegovina	BIH	2021	0
Botswana	BWA	1971	0
Botswana	BWA	1972	0
Botswana	BWA	1973	0
Botswana	BWA	1974	0
Botswana	BWA	1975	0
Botswana	BWA	1976	0
Botswana	BWA	1977	0
Botswana	BWA	1978	0
Botswana	BWA	1979	0
Botswana	BWA	1980	0
Botswana	BWA	1981	0
Botswana	BWA	1982	0
Botswana	BWA	1983	0
Botswana	BWA	1984	0
Botswana	BWA	1985	0
Botswana	BWA	1986	0
Botswana	BWA	1987	0
Botswana	BWA	1988	0
Botswana	BWA	1989	0
Botswana	BWA	1990	0
Botswana	BWA	1991	0
Botswana	BWA	1992	0
Botswana	BWA	1993	0
Botswana	BWA	1994	0
Botswana	BWA	1995	0
Botswana	BWA	1996	0
Botswana	BWA	1997	0
Botswana	BWA	1998	0
Botswana	BWA	1999	0
Botswana	BWA	2000	0
Botswana	BWA	2001	0
Botswana	BWA	2002	0
Botswana	BWA	2003	0
Botswana	BWA	2004	0
Botswana	BWA	2005	0
Botswana	BWA	2006	0
Botswana	BWA	2007	0
Botswana	BWA	2008	0
Botswana	BWA	2009	0
Botswana	BWA	2010	0
Botswana	BWA	2011	0
Botswana	BWA	2012	0
Botswana	BWA	2013	0
Botswana	BWA	2014	0
Botswana	BWA	2015	0
Botswana	BWA	2016	0
Botswana	BWA	2017	0
Botswana	BWA	2018	0
Botswana	BWA	2019	0
Botswana	BWA	2020	0
Botswana	BWA	2021	0
Brazil	BRA	1970	0.0580871
Brazil	BRA	1971	0.0866784
Brazil	BRA	1972	0.0829819
Brazil	BRA	1973	0.10601
Brazil	BRA	1974	0.47252
Brazil	BRA	1975	0.373604
Brazil	BRA	1976	0.330242
Brazil	BRA	1977	0.232335
Brazil	BRA	1978	0.224773
Brazil	BRA	1979	0.550619
Brazil	BRA	1980	0.699999
Brazil	BRA	1981	0.629316
Brazil	BRA	1982	0.435449
Brazil	BRA	1983	1.0798
Brazil	BRA	1984	1.49331
Brazil	BRA	1985	1.79285
Brazil	BRA	1986	0.658041
Brazil	BRA	1987	0.95738
Brazil	BRA	1988	0.643872
Brazil	BRA	1989	0.78284
Brazil	BRA	1990	1.03089
Brazil	BRA	1991	0.63577
Brazil	BRA	1992	0.72168
Brazil	BRA	1993	0.627723
Brazil	BRA	1994	0.444188
Brazil	BRA	1995	0.362005
Brazil	BRA	1996	0.471368
Brazil	BRA	1997	0.425302
Brazil	BRA	1998	0.269585
Brazil	BRA	1999	0.755293
Brazil	BRA	2000	1.4118
Brazil	BRA	2001	1.27148
Brazil	BRA	2002	1.67933
Brazil	BRA	2003	1.73819
Brazil	BRA	2004	1.88707
Brazil	BRA	2005	2.36913
Brazil	BRA	2006	2.44557
Brazil	BRA	2007	2.06708
Brazil	BRA	2008	2.44244
Brazil	BRA	2009	1.33048
Brazil	BRA	2010	1.49437
Brazil	BRA	2011	2.04629
Brazil	BRA	2012	2.04371
Brazil	BRA	2013	1.82332
Brazil	BRA	2014	1.86374
Brazil	BRA	2015	1.03927
Brazil	BRA	2016	0.83228
Brazil	BRA	2017	1.12837
Brazil	BRA	2018	1.90112
Brazil	BRA	2019	1.67613
Brazil	BRA	2020	1.07873
Brazil	BRA	2021	2.60446
Brunei	BRN	1970	2.74113
Brunei	BRN	1971	2.68505
Brunei	BRN	1972	9.21293
Brunei	BRN	1973	23.055
Brunei	BRN	1974	56.6552
Brunei	BRN	1975	52.931
Brunei	BRN	1976	55.2783
Brunei	BRN	1977	52.7272
Brunei	BRN	1978	49.159
Brunei	BRN	1980	52.7396
Brunei	BRN	1981	35.9351
Brunei	BRN	1982	23.1196
Brunei	BRN	1983	30.3469
Brunei	BRN	1984	34.3362
Brunei	BRN	1985	30.0355
Brunei	BRN	1986	22.9691
Brunei	BRN	1987	26.7855
Brunei	BRN	1988	19.0003
Brunei	BRN	1989	25.6467
Brunei	BRN	1990	30.6838
Brunei	BRN	1991	17.8487
Brunei	BRN	1992	19.1282
Brunei	BRN	1993	18.7936
Brunei	BRN	1994	16.05
Brunei	BRN	1995	13.7981
Brunei	BRN	1996	16.0664
Brunei	BRN	1997	14.8382
Brunei	BRN	1998	8.78645
Brunei	BRN	1999	14.7734
Brunei	BRN	2000	23.4896
Brunei	BRN	2001	16.7427
Brunei	BRN	2002	16.1097
Brunei	BRN	2003	16.6876
Brunei	BRN	2004	19.778
Brunei	BRN	2005	25.9567
Brunei	BRN	2006	30.5004
Brunei	BRN	2007	27.5237
Brunei	BRN	2008	26.3149
Brunei	BRN	2009	16.6919
Brunei	BRN	2010	20.3809
Brunei	BRN	2011	24.1926
Brunei	BRN	2012	20.2405
Brunei	BRN	2013	16.4963
Brunei	BRN	2014	14.6727
Brunei	BRN	2015	7.67941
Brunei	BRN	2016	6.61077
Brunei	BRN	2017	8.33582
Brunei	BRN	2018	11.0465
Brunei	BRN	2019	9.0005
Brunei	BRN	2020	3.45812
Brunei	BRN	2021	10.3734
Bulgaria	BGR	1980	0.0995954
Bulgaria	BGR	1981	0.0770048
Bulgaria	BGR	1982	0.0536327
Bulgaria	BGR	1983	0.0743297
Bulgaria	BGR	1984	0.101804
Bulgaria	BGR	1985	0.156159
Bulgaria	BGR	1986	0.0489958
Bulgaria	BGR	1987	0.0579644
Bulgaria	BGR	1988	0.0486972
Bulgaria	BGR	1989	0.0905875
Bulgaria	BGR	1990	0.10571
Bulgaria	BGR	1991	0.0292034
Bulgaria	BGR	1992	0.0294458
Bulgaria	BGR	1993	0.0187796
Bulgaria	BGR	1994	0.0271668
Bulgaria	BGR	1995	0.0145596
Bulgaria	BGR	1996	0.0217715
Bulgaria	BGR	1997	0.0161313
Bulgaria	BGR	1998	0.00502767
Bulgaria	BGR	1999	0.0163646
Bulgaria	BGR	2000	0.0741392
Bulgaria	BGR	2001	0.0192284
Bulgaria	BGR	2002	0.0210526
Bulgaria	BGR	2003	0.016183
Bulgaria	BGR	2004	0.0286551
Bulgaria	BGR	2005	0.0371743
Bulgaria	BGR	2006	0.0372115
Bulgaria	BGR	2007	0.0320679
Bulgaria	BGR	2008	0.0385928
Bulgaria	BGR	2009	0.0216534
Bulgaria	BGR	2010	0.0253292
Bulgaria	BGR	2011	0.0367279
Bulgaria	BGR	2012	0.0377762
Bulgaria	BGR	2013	0.0340056
Bulgaria	BGR	2014	0.0309655
Bulgaria	BGR	2015	0.0148485
Bulgaria	BGR	2016	0.0107368
Bulgaria	BGR	2017	0.015054
Bulgaria	BGR	2018	0.0215683
Bulgaria	BGR	2019	0.0184983
Bulgaria	BGR	2020	0.00967334
Bulgaria	BGR	2021	0.0193926
Burkina Faso	BFA	1980	0
Burkina Faso	BFA	1981	0
Burkina Faso	BFA	1982	0
Burkina Faso	BFA	1983	0
Burkina Faso	BFA	1984	0
Burkina Faso	BFA	1985	0
Burkina Faso	BFA	1986	0
Burkina Faso	BFA	1987	0
Burkina Faso	BFA	1988	0
Burkina Faso	BFA	1989	0
Burkina Faso	BFA	1990	0
Burkina Faso	BFA	1991	0
Burkina Faso	BFA	1992	0
Burkina Faso	BFA	1993	0
Burkina Faso	BFA	1994	0
Burkina Faso	BFA	1995	0
Burkina Faso	BFA	1996	0
Burkina Faso	BFA	1997	0
Burkina Faso	BFA	1998	0
Burkina Faso	BFA	1999	0
Burkina Faso	BFA	2000	0
Burkina Faso	BFA	2001	0
Burkina Faso	BFA	2002	0
Burkina Faso	BFA	2003	0
Burkina Faso	BFA	2004	0
Burkina Faso	BFA	2005	0
Burkina Faso	BFA	2006	0
Burkina Faso	BFA	2007	0
Burkina Faso	BFA	2008	0
Burkina Faso	BFA	2009	0
Burkina Faso	BFA	2010	0
Burkina Faso	BFA	2011	0
Burkina Faso	BFA	2012	0
Burkina Faso	BFA	2013	0
Burkina Faso	BFA	2014	0
Burkina Faso	BFA	2015	0
Burkina Faso	BFA	2016	0
Burkina Faso	BFA	2017	0
Burkina Faso	BFA	2018	0
Burkina Faso	BFA	2019	0
Burkina Faso	BFA	2020	0
Burkina Faso	BFA	2021	0
Burundi	BDI	1980	0
Burundi	BDI	1981	0
Burundi	BDI	1982	0
Burundi	BDI	1983	0
Burundi	BDI	1984	0
Burundi	BDI	1985	0
Burundi	BDI	1986	0
Burundi	BDI	1987	0
Burundi	BDI	1988	0
Burundi	BDI	1989	0
Burundi	BDI	1990	0
Burundi	BDI	1991	0
Burundi	BDI	1992	0
Burundi	BDI	1993	0
Burundi	BDI	1994	0
Burundi	BDI	1995	0
Burundi	BDI	1996	0
Burundi	BDI	1997	0
Burundi	BDI	1998	0
Burundi	BDI	1999	0
Burundi	BDI	2000	0
Burundi	BDI	2001	0
Burundi	BDI	2002	0
Burundi	BDI	2003	0
Burundi	BDI	2004	0
Burundi	BDI	2005	0
Burundi	BDI	2006	0
Burundi	BDI	2007	0
Burundi	BDI	2008	0
Burundi	BDI	2009	0
Burundi	BDI	2010	0
Burundi	BDI	2011	0
Burundi	BDI	2012	0
Burundi	BDI	2013	0
Burundi	BDI	2014	0
Burundi	BDI	2015	0
Burundi	BDI	2016	0
Burundi	BDI	2017	0
Burundi	BDI	2018	0
Burundi	BDI	2019	0
Burundi	BDI	2020	0
Burundi	BDI	2021	0
Cambodia	KHM	1993	0
Cambodia	KHM	1994	0
Cambodia	KHM	1995	0
Cambodia	KHM	1996	0
Cambodia	KHM	1997	0
Cambodia	KHM	1998	0
Cambodia	KHM	1999	0
Cambodia	KHM	2000	0
Cambodia	KHM	2001	0
Cambodia	KHM	2002	0
Cambodia	KHM	2003	0
Cambodia	KHM	2004	0
Cambodia	KHM	2005	0
Cambodia	KHM	2006	0
Cambodia	KHM	2007	0
Cambodia	KHM	2008	0
Cambodia	KHM	2010	0
Cambodia	KHM	2011	0
Cambodia	KHM	2012	0
Cambodia	KHM	2013	0
Cambodia	KHM	2014	0
Cambodia	KHM	2015	0
Cambodia	KHM	2016	0
Cambodia	KHM	2017	0
Cambodia	KHM	2018	0
Cambodia	KHM	2019	0
Cambodia	KHM	2020	0.000136728
Cambodia	KHM	2021	0.0410318
Cameroon	CMR	1971	0
Cameroon	CMR	1972	0
Cameroon	CMR	1973	0
Cameroon	CMR	1974	0
Cameroon	CMR	1975	0
Cameroon	CMR	1976	0
Cameroon	CMR	1977	0.0781817
Cameroon	CMR	1978	0.836814
Cameroon	CMR	1979	4.76693
Cameroon	CMR	1980	6.6965
Cameroon	CMR	1981	5.87804
Cameroon	CMR	1982	2.87852
Cameroon	CMR	1983	6.02764
Cameroon	CMR	1984	7.82271
Cameroon	CMR	1985	9.97862
Cameroon	CMR	1986	2.36486
Cameroon	CMR	1987	4.54942
Cameroon	CMR	1988	3.73209
Cameroon	CMR	1989	7.61263
Cameroon	CMR	1990	8.68451
Cameroon	CMR	1991	4.65316
Cameroon	CMR	1992	4.74199
Cameroon	CMR	1993	3.08799
Cameroon	CMR	1994	3.96667
Cameroon	CMR	1995	3.76455
Cameroon	CMR	1996	4.21595
Cameroon	CMR	1997	4.60079
Cameroon	CMR	1998	2.05168
Cameroon	CMR	1999	2.73931
Cameroon	CMR	2000	5.6535
Cameroon	CMR	2001	3.59717
Cameroon	CMR	2002	3.05284
Cameroon	CMR	2003	2.31676
Cameroon	CMR	2004	2.75939
Cameroon	CMR	2005	5.28439
Cameroon	CMR	2006	6.18343
Cameroon	CMR	2007	6.03959
Cameroon	CMR	2008	7.12108
Cameroon	CMR	2009	3.18642
Cameroon	CMR	2010	4.14191
Cameroon	CMR	2011	5.25804
Cameroon	CMR	2012	5.2617
Cameroon	CMR	2013	4.19598
Cameroon	CMR	2014	3.67836
Cameroon	CMR	2015	1.89664
Cameroon	CMR	2016	1.55547
Cameroon	CMR	2017	2.19708
Cameroon	CMR	2018	2.7843
Cameroon	CMR	2019	2.42269
Cameroon	CMR	2020	1.28059
Cameroon	CMR	2021	2.3616
Canada	CAN	1970	0.426219
Canada	CAN	1971	0.483634
Canada	CAN	1972	0.59096
Canada	CAN	1973	0.68693
Canada	CAN	1974	2.38832
Canada	CAN	1975	2.22091
Canada	CAN	1976	1.95008
Canada	CAN	1977	2.09691
Canada	CAN	1978	1.98951
Canada	CAN	1979	4.31015
Canada	CAN	1980	5.01982
Canada	CAN	1981	3.28392
Canada	CAN	1982	1.97677
Canada	CAN	1983	2.44822
Canada	CAN	1984	2.26665
Canada	CAN	1985	2.35728
Canada	CAN	1986	0.997983
Canada	CAN	1987	1.43057
Canada	CAN	1988	0.882613
Canada	CAN	1989	1.10438
Canada	CAN	1990	1.48749
Canada	CAN	1991	1.00432
Canada	CAN	1992	1.08495
Canada	CAN	1993	1.00985
Canada	CAN	1994	0.968662
Canada	CAN	1995	1.03435
Canada	CAN	1996	1.29674
Canada	CAN	1997	0.806571
Canada	CAN	1998	0.351268
Canada	CAN	1999	0.764046
Canada	CAN	2000	1.47118
Canada	CAN	2001	0.858858
Canada	CAN	2002	0.955943
Canada	CAN	2003	1.12579
Canada	CAN	2004	1.49756
Canada	CAN	2005	1.78499
Canada	CAN	2006	1.79784
Canada	CAN	2007	1.79573
Canada	CAN	2008	2.54002
Canada	CAN	2009	1.33142
Canada	CAN	2010	1.36036
Canada	CAN	2011	1.65206
Canada	CAN	2012	0.873035
Canada	CAN	2013	1.25009
Canada	CAN	2014	1.16513
Canada	CAN	2015	0.0345892
Canada	CAN	2016	0.471725
Canada	CAN	2017	0.816767
Canada	CAN	2018	1.50563
Canada	CAN	2019	1.61995
Canada	CAN	2020	0.888908
Canada	CAN	2021	2.82979
Cape Verde	CPV	1987	0
Cape Verde	CPV	1988	0
Cape Verde	CPV	1989	0
Cape Verde	CPV	1990	0
Cape Verde	CPV	1991	0
Cape Verde	CPV	1992	0
Cape Verde	CPV	1993	0
Cape Verde	CPV	1994	0
Cape Verde	CPV	1995	0
Cape Verde	CPV	1996	0
Cape Verde	CPV	1997	0
Cape Verde	CPV	1998	0
Cape Verde	CPV	1999	0
Cape Verde	CPV	2000	0
Cape Verde	CPV	2001	0
Cape Verde	CPV	2002	0
Cape Verde	CPV	2003	0
Cape Verde	CPV	2004	0
Cape Verde	CPV	2005	0
Cape Verde	CPV	2006	0
Cape Verde	CPV	2007	0
Cape Verde	CPV	2008	0
Cape Verde	CPV	2009	0
Cape Verde	CPV	2010	0
Cape Verde	CPV	2011	0
Cape Verde	CPV	2012	0
Cape Verde	CPV	2013	0
Cape Verde	CPV	2014	0
Cape Verde	CPV	2015	0
Cape Verde	CPV	2016	0
Cape Verde	CPV	2017	0
Cape Verde	CPV	2018	0
Cape Verde	CPV	2019	0
Cape Verde	CPV	2020	0
Cape Verde	CPV	2021	0
Cayman Islands	CYM	2006	0
Cayman Islands	CYM	2007	0
Cayman Islands	CYM	2008	0
Cayman Islands	CYM	2009	0
Cayman Islands	CYM	2010	0
Cayman Islands	CYM	2011	0
Cayman Islands	CYM	2012	0
Cayman Islands	CYM	2013	0
Cayman Islands	CYM	2014	0
Cayman Islands	CYM	2015	0
Cayman Islands	CYM	2016	0
Cayman Islands	CYM	2017	0
Cayman Islands	CYM	2018	0
Cayman Islands	CYM	2019	0
Cayman Islands	CYM	2020	0
Cayman Islands	CYM	2021	0
Central African Republic	CAF	1980	0
Central African Republic	CAF	1981	0
Central African Republic	CAF	1982	0
Central African Republic	CAF	1983	0
Central African Republic	CAF	1984	0
Central African Republic	CAF	1985	0
Central African Republic	CAF	1986	0
Central African Republic	CAF	1987	0
Central African Republic	CAF	1988	0
Central African Republic	CAF	1989	0
Central African Republic	CAF	1990	0
Central African Republic	CAF	1991	0
Central African Republic	CAF	1992	0
Central African Republic	CAF	1993	0
Central African Republic	CAF	1994	0
Central African Republic	CAF	1995	0
Central African Republic	CAF	1996	0
Central African Republic	CAF	1997	0
Central African Republic	CAF	1998	0
Central African Republic	CAF	1999	0
Central African Republic	CAF	2000	0
Central African Republic	CAF	2001	0
Central African Republic	CAF	2002	0
Central African Republic	CAF	2003	0
Central African Republic	CAF	2004	0
Central African Republic	CAF	2005	0
Central African Republic	CAF	2006	0
Central African Republic	CAF	2007	0
Central African Republic	CAF	2008	0
Central African Republic	CAF	2009	0
Central African Republic	CAF	2010	0
Central African Republic	CAF	2011	0
Central African Republic	CAF	2012	0
Central African Republic	CAF	2013	0
Central African Republic	CAF	2014	0
Central African Republic	CAF	2015	0
Central African Republic	CAF	2016	0
Central African Republic	CAF	2017	0
Central African Republic	CAF	2018	0
Central African Republic	CAF	2019	0
Central African Republic	CAF	2020	0
Central African Republic	CAF	2021	0
Chad	TCD	1980	0
Chad	TCD	1981	0
Chad	TCD	1982	0
Chad	TCD	1983	0
Chad	TCD	1984	0
Chad	TCD	1985	0
Chad	TCD	1986	0
Chad	TCD	1987	0
Chad	TCD	1988	0
Chad	TCD	1989	0
Chad	TCD	1990	0
Chad	TCD	1991	0
Chad	TCD	1992	0
Chad	TCD	1993	0
Chad	TCD	1994	0
Chad	TCD	1995	0
Chad	TCD	1996	0
Chad	TCD	1997	0
Chad	TCD	1998	0
Chad	TCD	1999	0
Chad	TCD	2000	0
Chad	TCD	2001	0
Chad	TCD	2002	0
Chad	TCD	2003	4.74383
Chad	TCD	2004	29.86
Chad	TCD	2005	32.6666
Chad	TCD	2006	30.8512
Chad	TCD	2007	28.9574
Chad	TCD	2008	29.6643
Chad	TCD	2009	14.6756
Chad	TCD	2010	20.0317
Chad	TCD	2011	24.3984
Chad	TCD	2012	20.5312
Chad	TCD	2013	15.7792
Chad	TCD	2014	11.3679
Chad	TCD	2015	6.297
Chad	TCD	2016	6.59688
Chad	TCD	2017	10.275
Chad	TCD	2018	16.6122
Chad	TCD	2019	15.5708
Chad	TCD	2020	9.22817
Chad	TCD	2021	16.7516
Chile	CHL	1970	0.0562266
Chile	CHL	1971	0.0773645
Chile	CHL	1972	0.0828826
Chile	CHL	1973	0.104264
Chile	CHL	1974	0.60635
Chile	CHL	1975	1.23615
Chile	CHL	1976	0.979512
Chile	CHL	1977	0.607553
Chile	CHL	1978	0.582775
Chile	CHL	1979	1.118
Chile	CHL	1980	1.0398
Chile	CHL	1981	0.903989
Chile	CHL	1982	0.772552
Chile	CHL	1983	1.18929
Chile	CHL	1984	1.18049
Chile	CHL	1985	1.17571
Chile	CHL	1986	0.40903
Chile	CHL	1987	0.544418
Chile	CHL	1988	0.282173
Chile	CHL	1989	0.335865
Chile	CHL	1990	0.378184
Chile	CHL	1991	0.157027
Chile	CHL	1992	0.1231
Chile	CHL	1993	0.101836
Chile	CHL	1994	0.0759573
Chile	CHL	1995	0.057797
Chile	CHL	1996	0.0596959
Chile	CHL	1997	0.0382895
Chile	CHL	1998	0.0234701
Chile	CHL	1999	0.041825
Chile	CHL	2000	0.0648093
Chile	CHL	2001	0.0510191
Chile	CHL	2002	0.0501709
Chile	CHL	2003	0.0506283
Chile	CHL	2004	0.0480418
Chile	CHL	2005	0.0466681
Chile	CHL	2006	0.03052
Chile	CHL	2007	0.0244413
Chile	CHL	2008	0.0394143
Chile	CHL	2009	0.0241963
Chile	CHL	2010	0.0177167
Chile	CHL	2011	0.0202997
Chile	CHL	2012	0.0339243
Chile	CHL	2013	0.0371419
Chile	CHL	2014	0.0299546
Chile	CHL	2015	0.00702175
Chile	CHL	2016	0.00716568
Chile	CHL	2017	0.00833339
Chile	CHL	2018	0.0122096
Chile	CHL	2019	0.0113846
Chile	CHL	2020	0.00734834
Chile	CHL	2021	0.0126983
China	CHN	1970	0.0239933
China	CHN	1971	0.0326166
China	CHN	1972	0.110289
China	CHN	1973	0.335981
China	CHN	1974	2.77486
China	CHN	1975	3.13064
China	CHN	1976	4.11075
China	CHN	1977	4.32661
China	CHN	1978	5.55801
China	CHN	1979	11.601
China	CHN	1980	12.2797
China	CHN	1981	9.41179
China	CHN	1982	6.06435
China	CHN	1983	6.54805
China	CHN	1984	6.223
China	CHN	1985	5.60486
China	CHN	1986	2.84717
China	CHN	1987	4.78169
China	CHN	1988	3.1896
China	CHN	1989	4.15992
China	CHN	1990	5.54446
China	CHN	1991	3.02705
China	CHN	1992	2.9601
China	CHN	1993	2.81112
China	CHN	1994	1.91608
China	CHN	1995	1.62342
China	CHN	1996	1.84232
China	CHN	1997	1.44303
China	CHN	1998	0.634592
China	CHN	1999	1.08728
China	CHN	2000	2.03905
China	CHN	2001	1.32058
China	CHN	2002	1.24409
China	CHN	2003	1.28559
China	CHN	2004	1.63506
China	CHN	2005	2.23061
China	CHN	2006	2.22552
China	CHN	2007	1.75983
China	CHN	2008	1.99029
China	CHN	2009	0.899051
China	CHN	2010	1.22257
China	CHN	2011	1.54521
China	CHN	2012	1.28349
China	CHN	2013	1.07614
China	CHN	2014	0.8881
China	CHN	2015	0.335244
China	CHN	2016	0.245867
China	CHN	2017	0.313804
China	CHN	2018	0.413039
China	CHN	2019	0.298458
China	CHN	2020	0.114304
China	CHN	2021	0.308579
Colombia	COL	1970	0.453852
Colombia	COL	1971	0.685517
Colombia	COL	1972	0.657318
Colombia	COL	1973	0.929423
Colombia	COL	1974	3.98291
Colombia	COL	1975	3.33821
Colombia	COL	1976	2.86099
Colombia	COL	1977	1.78536
Colombia	COL	1978	1.56559
Colombia	COL	1979	3.25082
Colombia	COL	1980	3.40245
Colombia	COL	1981	2.79806
Colombia	COL	1982	1.6723
Colombia	COL	1983	2.43967
Colombia	COL	1984	2.66353
Colombia	COL	1985	2.92184
Colombia	COL	1986	2.14754
Colombia	COL	1987	4.29296
Colombia	COL	1988	2.87586
Colombia	COL	1989	4.66461
Colombia	COL	1990	5.85725
Colombia	COL	1991	3.02074
Colombia	COL	1992	2.83229
Colombia	COL	1993	2.4562
Colombia	COL	1994	1.94674
Colombia	COL	1995	2.53984
Colombia	COL	1996	3.29062
Colombia	COL	1997	2.73079
Colombia	COL	1998	1.79752
Colombia	COL	1999	3.89182
Colombia	COL	2000	5.13691
Colombia	COL	2001	3.38953
Colombia	COL	2002	3.47235
Colombia	COL	2003	3.70073
Colombia	COL	2004	3.8464
Colombia	COL	2005	4.66188
Colombia	COL	2006	5.14628
Colombia	COL	2007	4.23709
Colombia	COL	2008	5.53393
Colombia	COL	2009	3.27049
Colombia	COL	2010	4.39208
Colombia	COL	2011	6.93264
Colombia	COL	2012	6.20532
Colombia	COL	2013	5.87412
Colombia	COL	2014	5.26376
Colombia	COL	2015	2.62771
Colombia	COL	2016	1.86177
Colombia	COL	2017	2.42584
Colombia	COL	2018	3.64007
Colombia	COL	2019	3.14271
Colombia	COL	2020	1.5628
Colombia	COL	2021	3.42402
Comoros	COM	1980	0
Comoros	COM	1981	0
Comoros	COM	1982	0
Comoros	COM	1983	0
Comoros	COM	1984	0
Comoros	COM	1985	0
Comoros	COM	1986	0
Comoros	COM	1987	0
Comoros	COM	1988	0
Comoros	COM	1989	0
Comoros	COM	1990	0
Comoros	COM	1991	0
Comoros	COM	1992	0
Comoros	COM	1993	0
Comoros	COM	1994	0
Comoros	COM	1995	0
Comoros	COM	1996	0
Comoros	COM	1997	0
Comoros	COM	1998	0
Comoros	COM	1999	0
Comoros	COM	2000	0
Comoros	COM	2001	0
Comoros	COM	2002	0
Comoros	COM	2003	0
Comoros	COM	2004	0
Comoros	COM	2005	0
Comoros	COM	2006	0
Comoros	COM	2007	0
Comoros	COM	2008	0
Comoros	COM	2009	0
Comoros	COM	2010	0
Comoros	COM	2011	0
Comoros	COM	2012	0
Comoros	COM	2013	0
Comoros	COM	2014	0
Comoros	COM	2015	0
Comoros	COM	2016	0
Comoros	COM	2017	0
Comoros	COM	2018	0
Comoros	COM	2019	0
Comoros	COM	2020	0
Comoros	COM	2021	0
Congo	COG	1970	0.0115603
Congo	COG	1971	0.00309844
Congo	COG	1972	0.186201
Congo	COG	1973	1.51886
Congo	COG	1974	24.262
Congo	COG	1975	13.1386
Congo	COG	1976	15.4202
Congo	COG	1977	16.5002
Congo	COG	1978	17.1335
Congo	COG	1979	37.9394
Congo	COG	1980	29.35
Congo	COG	1981	17.8736
Congo	COG	1982	7.25092
Congo	COG	1983	17.9105
Congo	COG	1984	22.3319
Congo	COG	1985	24.1676
Congo	COG	1986	9.91665
Congo	COG	1987	18.2465
Congo	COG	1988	17.2879
Congo	COG	1989	31.9904
Congo	COG	1990	37.068
Congo	COG	1991	20.7038
Congo	COG	1992	23.3587
Congo	COG	1993	27.2826
Congo	COG	1994	32.4836
Congo	COG	1995	31.3905
Congo	COG	1996	34.2466
Congo	COG	1997	38.843
Congo	COG	1998	23.4026
Congo	COG	1999	34.4709
Congo	COG	2000	55.9534
Congo	COG	2001	43.2924
Congo	COG	2002	40.6339
Congo	COG	2003	32.8203
Congo	COG	2004	36.7574
Congo	COG	2005	44.9456
Congo	COG	2006	50.1208
Congo	COG	2007	43.9536
Congo	COG	2008	48.8604
Congo	COG	2009	32.0194
Congo	COG	2010	40.941
Congo	COG	2011	48.6661
Congo	COG	2012	38.0875
Congo	COG	2013	29.6858
Congo	COG	2014	24.8226
Congo	COG	2015	12.2747
Congo	COG	2016	12.8005
Congo	COG	2017	25.0228
Congo	COG	2018	38.2487
Congo	COG	2019	35.8518
Congo	COG	2020	22.4084
Congo	COG	2021	34.3829
Costa Rica	CRI	1971	0
Costa Rica	CRI	1972	0
Costa Rica	CRI	1973	0
Costa Rica	CRI	1974	0
Costa Rica	CRI	1975	0
Costa Rica	CRI	1976	0
Costa Rica	CRI	1977	0
Costa Rica	CRI	1978	0
Costa Rica	CRI	1979	0
Costa Rica	CRI	1980	0
Costa Rica	CRI	1981	0
Costa Rica	CRI	1982	0
Costa Rica	CRI	1983	0
Costa Rica	CRI	1984	0
Costa Rica	CRI	1985	0
Costa Rica	CRI	1986	0
Costa Rica	CRI	1987	0
Costa Rica	CRI	1988	0
Costa Rica	CRI	1989	0
Costa Rica	CRI	1990	0
Costa Rica	CRI	1991	0
Costa Rica	CRI	1992	0
Costa Rica	CRI	1993	0
Costa Rica	CRI	1994	0
Costa Rica	CRI	1995	0
Costa Rica	CRI	1996	0
Costa Rica	CRI	1997	0
Costa Rica	CRI	1998	0
Costa Rica	CRI	1999	0
Costa Rica	CRI	2000	0
Costa Rica	CRI	2001	0
Costa Rica	CRI	2002	0.0283908
Costa Rica	CRI	2003	0.0374596
Costa Rica	CRI	2004	0.0613781
Costa Rica	CRI	2005	0.132635
Costa Rica	CRI	2006	0.145655
Costa Rica	CRI	2007	0.177661
Costa Rica	CRI	2008	0.177814
Costa Rica	CRI	2009	0.0442489
Costa Rica	CRI	2010	0
Costa Rica	CRI	2011	0
Costa Rica	CRI	2012	0.064985
Costa Rica	CRI	2013	0.0577584
Costa Rica	CRI	2014	0.0518301
Costa Rica	CRI	2015	0.0200961
Costa Rica	CRI	2016	0.0158677
Costa Rica	CRI	2017	0.00585553
Costa Rica	CRI	2018	0.00900723
Costa Rica	CRI	2019	0.00698635
Costa Rica	CRI	2020	0.00341591
Costa Rica	CRI	2021	0.00896579
Cote d'Ivoire	CIV	1971	0
Cote d'Ivoire	CIV	1972	0
Cote d'Ivoire	CIV	1973	0
Cote d'Ivoire	CIV	1974	0
Cote d'Ivoire	CIV	1975	0
Cote d'Ivoire	CIV	1976	0
Cote d'Ivoire	CIV	1977	0
Cote d'Ivoire	CIV	1978	0
Cote d'Ivoire	CIV	1979	0
Cote d'Ivoire	CIV	1980	0.111625
Cote d'Ivoire	CIV	1981	0.406239
Cote d'Ivoire	CIV	1982	0.344694
Cote d'Ivoire	CIV	1983	1.08326
Cote d'Ivoire	CIV	1984	1.23721
Cote d'Ivoire	CIV	1985	1.3298
Cote d'Ivoire	CIV	1986	0.326483
Cote d'Ivoire	CIV	1987	0.535703
Cote d'Ivoire	CIV	1988	0.284585
Cote d'Ivoire	CIV	1989	0.10498
Cote d'Ivoire	CIV	1990	0.111829
Cote d'Ivoire	CIV	1991	0.041126
Cote d'Ivoire	CIV	1992	0.213957
Cote d'Ivoire	CIV	1993	0.23125
Cote d'Ivoire	CIV	1994	0.263284
Cote d'Ivoire	CIV	1995	0.230816
Cote d'Ivoire	CIV	1996	0.38036
Cote d'Ivoire	CIV	1997	0.319863
Cote d'Ivoire	CIV	1998	0.101604
Cote d'Ivoire	CIV	1999	0.162965
Cote d'Ivoire	CIV	2000	0.308013
Cote d'Ivoire	CIV	2001	0.184451
Cote d'Ivoire	CIV	2002	0.449872
Cote d'Ivoire	CIV	2003	0.547536
Cote d'Ivoire	CIV	2004	0.868358
Cote d'Ivoire	CIV	2005	2.12719
Cote d'Ivoire	CIV	2006	3.70627
Cote d'Ivoire	CIV	2007	2.92985
Cote d'Ivoire	CIV	2008	3.23685
Cote d'Ivoire	CIV	2009	1.55324
Cote d'Ivoire	CIV	2010	1.97608
Cote d'Ivoire	CIV	2011	2.38569
Cote d'Ivoire	CIV	2012	2.01611
Cote d'Ivoire	CIV	2013	1.32089
Cote d'Ivoire	CIV	2014	0.691789
Cote d'Ivoire	CIV	2015	0.366603
Cote d'Ivoire	CIV	2016	0.384371
Cote d'Ivoire	CIV	2017	0.811413
Cote d'Ivoire	CIV	2018	0.930497
Cote d'Ivoire	CIV	2019	0.857465
Cote d'Ivoire	CIV	2020	0.371217
Cote d'Ivoire	CIV	2021	0.700173
Croatia	HRV	1995	0.403626
Croatia	HRV	1996	0.47476
Croatia	HRV	1997	0.362647
Croatia	HRV	1998	0.0917244
Croatia	HRV	1999	0.288929
Croatia	HRV	2000	0.630971
Croatia	HRV	2001	0.407483
Croatia	HRV	2002	0.356223
Croatia	HRV	2003	0.301237
Croatia	HRV	2004	0.332637
Croatia	HRV	2005	0.422317
Croatia	HRV	2006	0.419644
Croatia	HRV	2007	0.370493
Croatia	HRV	2008	0.441054
Croatia	HRV	2009	0.257277
Croatia	HRV	2010	0.283129
Croatia	HRV	2011	0.422235
Croatia	HRV	2012	0.424759
Croatia	HRV	2013	0.380362
Croatia	HRV	2014	0.33234
Croatia	HRV	2015	0.188549
Croatia	HRV	2016	0.152408
Croatia	HRV	2017	0.222494
Croatia	HRV	2018	0.320304
Croatia	HRV	2019	0.276146
Croatia	HRV	2020	0.141105
Croatia	HRV	2021	0.280358
Cuba	CUB	1970	0.0047713
Cuba	CUB	1971	0.0140046
Cuba	CUB	1972	0.0186977
Cuba	CUB	1973	0.0337887
Cuba	CUB	1974	0.197846
Cuba	CUB	1975	0.19331
Cuba	CUB	1976	0.196788
Cuba	CUB	1977	0.160586
Cuba	CUB	1978	0.140415
Cuba	CUB	1979	0.336191
Cuba	CUB	1980	0.230118
Cuba	CUB	1981	0.301829
Cuba	CUB	1982	0.217068
Cuba	CUB	1983	0.33536
Cuba	CUB	1984	0.380566
Cuba	CUB	1985	0.42838
Cuba	CUB	1986	0.18442
Cuba	CUB	1987	0.286924
Cuba	CUB	1988	0.164363
Cuba	CUB	1989	0.252991
Cuba	CUB	1990	0.318912
Cuba	CUB	1991	0.201212
Cuba	CUB	1992	0.281464
Cuba	CUB	1993	0.313376
Cuba	CUB	1994	0.374699
Cuba	CUB	1995	0.369988
Cuba	CUB	1996	0.67539
Cuba	CUB	1997	0.626494
Cuba	CUB	1998	0.300379
Cuba	CUB	1999	0.543948
Cuba	CUB	2000	1.03392
Cuba	CUB	2001	0.779895
Cuba	CUB	2002	0.83178
Cuba	CUB	2003	0.993676
Cuba	CUB	2004	1.1858
Cuba	CUB	2005	1.37379
Cuba	CUB	2006	1.48799
Cuba	CUB	2007	1.57046
Cuba	CUB	2008	2.02586
Cuba	CUB	2009	0.987367
Cuba	CUB	2010	1.34124
Cuba	CUB	2011	1.84021
Cuba	CUB	2012	1.66617
Cuba	CUB	2013	1.44284
Cuba	CUB	2014	1.25544
Cuba	CUB	2015	0.43995
Cuba	CUB	2016	0.32542
Cuba	CUB	2017	0.457705
Cuba	CUB	2018	0.731495
Cuba	CUB	2019	0.543713
Cuba	CUB	2020	0.2225
Cyprus	CYP	1975	0
Cyprus	CYP	1976	0
Cyprus	CYP	1977	0
Cyprus	CYP	1978	0
Cyprus	CYP	1979	0
Cyprus	CYP	1980	0
Cyprus	CYP	1981	0
Cyprus	CYP	1982	0
Cyprus	CYP	1983	0
Cyprus	CYP	1984	0
Cyprus	CYP	1985	0
Cyprus	CYP	1986	0
Cyprus	CYP	1987	0
Cyprus	CYP	1988	0
Cyprus	CYP	1989	0
Cyprus	CYP	1990	0
Cyprus	CYP	1991	0
Cyprus	CYP	1992	0
Cyprus	CYP	1993	0
Cyprus	CYP	1994	0
Cyprus	CYP	1995	0
[truncated: 6,407 more rows]

## Sheet: 07_AlignmentScores
07 — UN voting alignment scores (2025 vintage)
Bailey-Strezhnev-Voeten IdealPointFP normalized to 0–1 scale. Used in supply-chain concentration analysis (Section 6).
country	ideal_point	alignment_0_1
United States	3.36214	1
Canada	1.07948	0.514927
Mexico	-0.240634	0.234399
Brazil	-0.645956	0.148267
Chile	-0.213477	0.24017
United Kingdom	1.46507	0.596867
France	1.33659	0.569565
Germany	1.07582	0.514149
Russia	0.435069	0.377988
DRC	-0.273205	0.227478
Iran	-0.657871	0.145735
Saudi Arabia	-0.358721	0.209305
China	-0.162366	0.251031
South Korea	1.00506	0.499113
Japan	0.697421	0.433739
India	0.0170961	0.289168
Indonesia	-0.784217	0.118886
Australia	0.966609	0.490942

## Sheet: 08_CountryQuarter_Gen
08 — Ember country×quarter generation panel (full panel, v3.5)
Ember Monthly Electricity Data aggregated to quarterly. 3,547 rows × 17 cols (all rows written). Solar+wind generation in TWh, plus other source breakdowns and renewable share.
Area	ISO 3 code	quarter	Solar	Wind	Renewables	Hydro	Bioenergy	Coal	Gas	Nuclear	Other Renewables	Total Generation	renew_share	solar_wind_twh	solar_wind_share	solar_wind_yoy
Argentina	ARG	2018-01-01	0	0.16	10.49	10.27	0.06	0.76	22.37	1.72		36.14	0.29026	0.16	0.00442723
Argentina	ARG	2018-04-01	0	0.21	9.78	9.47	0.1	0.6	21.03	2.07		34.16	0.2863	0.21	0.00614754
Argentina	ARG	2018-07-01	0.02	0.38	10.64	10.1	0.14	0.62	21.83	1.68		35.36	0.300905	0.4	0.0113122
Argentina	ARG	2018-10-01	0.07	0.67	12.4	11.55	0.11	0.04	18	0.99		31.82	0.389692	0.74	0.0232558
Argentina	ARG	2019-01-01	0.13	0.83	10.45	9.4	0.09	0.13	20.81	1.03		32.92	0.317436	0.96	0.0291616	500
Argentina	ARG	2019-04-01	0.13	1.07	10.29	8.96	0.13	0.22	17.86	2.22		31.04	0.331508	1.2	0.0386598	471.429
Argentina	ARG	2019-07-01	0.21	1.4	11.33	9.54	0.18	0.47	19.81	2.48		34.54	0.328025	1.61	0.0466126	302.5
Argentina	ARG	2019-10-01	0.33	1.69	11.1	8.92	0.16	0.27	18.69	2.2		32.76	0.338828	2.02	0.0616606	172.973
Argentina	ARG	2020-01-01	0.29	1.99	10.5	8.11	0.11	0.35	21.39	2.52		35.32	0.297282	2.28	0.0645527	137.5
Argentina	ARG	2020-04-01	0.21	2.07	9.13	6.69	0.16	0.11	17.77	2.92		30.18	0.302518	2.28	0.0755467	90
Argentina	ARG	2020-07-01	0.29	2.54	11.84	8.78	0.23	0.77	17.86	2.51		33.55	0.352906	2.83	0.0843517	75.7764
Argentina	ARG	2020-10-01	0.56	2.8	10.37	6.77	0.24	0.58	21.5	2.06		35.14	0.295105	3.36	0.0956175	66.3366
Argentina	ARG	2021-01-01	0.52	2.84	10.61	7.04	0.21	0.46	21.8	1.92		35.33	0.300311	3.36	0.0951033	47.3684
Argentina	ARG	2021-04-01	0.38	3.11	9.32	5.57	0.26	0.85	20.7	2.31		33.87	0.27517	3.49	0.103041	53.0702
Argentina	ARG	2021-07-01	0.5	3.55	10.29	5.9	0.34	0.84	22.47	2.94		37.05	0.277733	4.05	0.109312	43.1095
Argentina	ARG	2021-10-01	0.8	3.45	11.32	6.77	0.3	0.65	19.99	3		35.53	0.318604	4.25	0.119617	26.4881
Argentina	ARG	2022-01-01	0.77	3.51	9.82	5.27	0.27	0.82	21.8	2.62		35.73	0.274839	4.28	0.119787	27.381
Argentina	ARG	2022-04-01	0.58	3.45	12	7.69	0.28	0.94	18.96	1.97		34.48	0.348028	4.03	0.116879	15.4728
Argentina	ARG	2022-07-01	0.67	3.53	12.14	7.62	0.32	0.68	17.7	2.39		33.47	0.362713	4.2	0.125486	3.7037
Argentina	ARG	2022-10-01	0.92	3.67	15.55	10.66	0.3	0.56	17.97	0.49		35.09	0.443146	4.59	0.130806	8
Argentina	ARG	2023-01-01	0.85	3.33	13.32	8.89	0.25	1.12	21.43	1.88		38.62	0.344899	4.18	0.108234	-2.33645
Argentina	ARG	2023-04-01	0.6	3.48	11.14	6.79	0.27	0.5	17.8	2.03		32.05	0.347582	4.08	0.127301	1.24069
Argentina	ARG	2023-07-01	0.74	3.67	17.07	12.32	0.34	0.56	15.63	2.23		35.86	0.476018	4.41	0.122978	5
Argentina	ARG	2023-10-01	1.06	4.01	17.89	12.52	0.3	0.02	13.8	2.81		34.85	0.513343	5.07	0.145481	10.4575
Argentina	ARG	2024-01-01	1.01	3.86	14.7	9.54	0.29	0.22	20.69	3.23		39.29	0.374141	4.87	0.12395	16.5072
Argentina	ARG	2024-04-01	0.71	3.73	12.81	8.1	0.27	0.67	16.59	3.37		33.81	0.378882	4.44	0.131322	8.82353
Argentina	ARG	2024-07-01	0.88	4.17	13.73	8.31	0.37	0.62	17.81	2.37		34.88	0.393635	5.05	0.144782	14.5125
Argentina	ARG	2024-10-01	1.33	4.42	15.05	8.99	0.31	0.15	17.18	1.47		34.16	0.440574	5.75	0.168326	13.4122
Argentina	ARG	2025-01-01	1.23	4.26	12.83	7.02	0.32	0.39	22.58	2.58		38.75	0.331097	5.49	0.141677	12.731
Argentina	ARG	2025-04-01	0.94	4.6	13.82	7.88	0.4	0.55	16.83	2.67		34.11	0.40516	5.54	0.162416	24.7748
Argentina	ARG	2025-07-01	1.2	4.67	14.27	7.96	0.44	0.72	16.39	2.74		34.33	0.415671	5.87	0.170987	16.2376
Argentina	ARG	2025-10-01	1.73	5.1	15.89	8.66	0.4	0.03	16.67	2.76		35.57	0.446725	6.83	0.192016	18.7826
Argentina	ARG	2026-01-01	1.74	4.68	12.98	6.18	0.38	0.33	22.13	2.35		38.12	0.340504	6.42	0.168416	16.9399
Armenia	ARM	2019-01-01	0	0	0.59	0.59	0	0	0.54	0.83		1.96	0.30102	0	0
Armenia	ARM	2019-04-01	0.01	0	1.37	1.36	0	0	0.54	0.37		2.28	0.600877	0.01	0.00438596
Armenia	ARM	2019-07-01	0	0	0.8	0.8	0	0	1.28	0.12		2.2	0.363636	0	0
Armenia	ARM	2019-10-01	0	0	0.55	0.55	0	0	0.68	0.88		2.11	0.260664	0	0
Armenia	ARM	2020-01-01	0	0	0.48	0.48	0	0	0.91	0.81		2.2	0.218182	0	0
Armenia	ARM	2020-04-01	0.03	0	1.11	1.08	0	0	0.26	0.76		2.13	0.521127	0.03	0.0140845	200
Armenia	ARM	2020-07-01	0.03	0	0.63	0.6	0	0	1.17	0.32		2.12	0.29717	0.03	0.0141509
Armenia	ARM	2020-10-01	0.02	0	0.44	0.42	0	0	0.81	0.87		2.12	0.207547	0.02	0.00943396
Armenia	ARM	2021-01-01	0.03	0	0.57	0.54	0	0	0.84	0.84		2.25	0.253333	0.03	0.0133333
Armenia	ARM	2021-04-01	0.08	0	1.31	1.23	0	0	0.44	0.4		2.15	0.609302	0.08	0.0372093	166.667
Armenia	ARM	2021-07-01	0.03	0	0.61	0.58	0	0	1.15	0		1.76	0.346591	0.03	0.0170455	0
Armenia	ARM	2021-10-01	0.04	0	0.54	0.5	0	0	0.94	0.76		2.24	0.241071	0.04	0.0178571	100
Armenia	ARM	2022-01-01	0.06	0	0.5	0.44	0	0	1.19	0.92		2.61	0.191571	0.06	0.0229885	100
Armenia	ARM	2022-04-01	0.15	0	1.39	1.24	0	0	0.83	0.22		2.44	0.569672	0.15	0.0614754	87.5
Armenia	ARM	2022-07-01	0.12	0	0.8	0.68	0	0	0.75	0.82		2.37	0.337553	0.12	0.0506329	300
Armenia	ARM	2022-10-01	0.08	0	0.56	0.48	0	0	1.1	0.89		2.55	0.219608	0.08	0.0313725	100
Armenia	ARM	2023-01-01	0.14	0	0.56	0.42	0	0	1.11	0.94		2.61	0.214559	0.14	0.0536398	133.333
Armenia	ARM	2023-04-01	0.24	0	1.16	0.92	0	0	0.78	0.35		2.29	0.50655	0.24	0.104803	60
Armenia	ARM	2023-07-01	0.22	0	0.86	0.64	0	0	0.99	0.5		2.35	0.365957	0.22	0.093617	83.3333
Armenia	ARM	2023-10-01	0.13	0	0.54	0.41	0	0	0.84	0.92		2.3	0.234783	0.13	0.0565217	62.5
Armenia	ARM	2024-01-01	0.14	0	0.59	0.45	0	0	1.05	0.95		2.59	0.227799	0.14	0.0540541	0
Armenia	ARM	2024-04-01	0.34	0	1.56	1.22	0	0	0.53	0.45		2.54	0.614173	0.34	0.133858	41.6667
Armenia	ARM	2024-07-01	0.29	0	0.99	0.7	0	0	1.05	0.49		2.53	0.391304	0.29	0.114625	31.8182
Armenia	ARM	2024-10-01	0.13	0	0.56	0.43		0	0.95	0.98		2.49	0.2249	0.13	0.0522088	0
Armenia	ARM	2025-01-01	0.24	0	0.98	0.74	0	0	0.86	0.95		2.79	0.351254	0.24	0.0860215	71.4286
Armenia	ARM	2025-04-01	0.17	0	1	0.83		0	0.56	0.28		1.84	0.543478	0.17	0.0923913	-50
Armenia	ARM	2025-07-01	0.12	0	0.8	0.68		0	0.81	0.78		2.39	0.334728	0.12	0.0502092	-58.6207
Armenia	ARM	2025-10-01	0.24	0	0.72	0.48	0	0	1.14	0.91		2.77	0.259928	0.24	0.0866426	84.6154
Armenia	ARM	2026-01-01	0.26	0	0.77	0.51	0	0	1.24	0.95		2.96	0.260135	0.26	0.0878378	8.33333
Australia	AUS	1999-01-01	0	0	1.88	1.88	0	37.04	1.94			40.87	0.0459995	0	0
Australia	AUS	1999-04-01	0	0	1.5	1.5	0	38.01	2.02			41.53	0.0361185	0	0
Australia	AUS	1999-07-01	0	0	1.54	1.54	0	39.35	2.18			43.08	0.0357474	0	0
Australia	AUS	1999-10-01	0	0	1.53	1.53	0	37.3	2.12			40.96	0.0373535	0	0
Australia	AUS	2000-01-01	0	0	1.84	1.84	0	37.82	2.99			42.7	0.0430913	0	0
Australia	AUS	2000-04-01	0	0	1.6	1.6	0	38.95	2.48			43.04	0.0371747	0	0
Australia	AUS	2000-07-01	0	0	2.13	2.13	0	40.18	2.13			44.44	0.0479298	0	0
Australia	AUS	2000-10-01	0	0	1.36	1.36	0	38.81	1.86			42.05	0.0323424	0	0
Australia	AUS	2001-01-01	0	0	1.45	1.45	0	39.4	2.74			43.6	0.0332569	0	0
Australia	AUS	2001-04-01	0	0	1.61	1.61	0	39.34	2.42			43.37	0.0371224	0	0
Australia	AUS	2001-07-01	0	0	1.39	1.39	0	41.15	2.52			45.06	0.0308478	0	0
Australia	AUS	2001-10-01	0	0	1.5	1.5	0	38.78	2.29			42.63	0.0351865	0	0
Australia	AUS	2002-01-01	0	0	1.28	1.28	0	39.76	2.11			43.21	0.0296228	0	0
Australia	AUS	2002-04-01	0	0	1.06	1.06	0	40.84	2.59			44.5	0.0238202	0	0
Australia	AUS	2002-07-01	0	0	1.49	1.49	0	42.24	2.68			46.41	0.0321051	0	0
Australia	AUS	2002-10-01	0	0	1.35	1.35	0	40.48	2.44			44.28	0.0304878	0	0
Australia	AUS	2003-01-01	0	0	1.85	1.85	0	40.63	2.04			44.53	0.041545	0	0
Australia	AUS	2003-04-01	0	0	1.48	1.48	0	41.53	1.9			44.91	0.0329548	0	0
Australia	AUS	2003-07-01	0	0	2.09	2.09	0	43.28	2			47.37	0.0441208	0	0
Australia	AUS	2003-10-01	0	0	1.64	1.64	0	41.42	2.04			45.1	0.0363636	0	0
Australia	AUS	2004-01-01	0	0	1.04	1.04	0	43.86	1.96			46.87	0.022189	0	0
Australia	AUS	2004-04-01	0	0	0.98	0.98	0	42.9	2.7			46.58	0.0210391	0	0
Australia	AUS	2004-07-01	0	0	1.36	1.36	0	44.64	2.34			48.34	0.0281341	0	0
Australia	AUS	2004-10-01	0	0	1.39	1.39	0	41.99	2.67			46.08	0.0301649	0	0
Australia	AUS	2005-01-01	0	0	1.54	1.54	0	42.82	2.25			46.62	0.033033	0	0
Australia	AUS	2005-04-01	0	0	2.83	2.83	0	42.8	3			48.63	0.0581945	0	0
Australia	AUS	2005-07-01	0	0	4.13	4.13	0	44.35	2.98			51.46	0.0802565	0	0
Australia	AUS	2005-10-01	0	0	3.85	3.85	0	42.55	2.75			49.16	0.0783157	0	0
Australia	AUS	2006-01-01	0	0	3.71	3.71	0	44.13	2.82			50.67	0.0732189	0	0
Australia	AUS	2006-04-01	0	0	4.14	4.14	0	44.37	2.9			51.41	0.0805291	0	0
Australia	AUS	2006-07-01	0	0	3.9	3.9	0	45.44	3.41			52.75	0.0739336	0	0
Australia	AUS	2006-10-01	0	0	2.68	2.68	0	43.9	3.57			50.15	0.0534397	0	0
Australia	AUS	2007-01-01	0	0	3.03	3.03	0	44.36	4.71			52.13	0.0581239	0	0
Australia	AUS	2007-04-01	0	0	3.78	3.78	0	41.98	5.51			51.29	0.0736986	0	0
Australia	AUS	2007-07-01	0	0.03	3.18	3.15	0	45.92	4.43			53.55	0.0593838	0.03	0.000560224
Australia	AUS	2007-10-01	0	0.04	2.77	2.73	0	43.41	4.73			50.93	0.0543884	0.04	0.000785392
Australia	AUS	2008-01-01	0	0.11	2.61	2.5	0	44.62	4.49			51.77	0.0504153	0.11	0.00212478
Australia	AUS	2008-04-01	0	0.15	3.23	3.08	0	43.62	4.96			51.81	0.0623432	0.15	0.00289519
Australia	AUS	2008-07-01	0	0.26	3.54	3.28	0	46.71	4.6			54.85	0.0645397	0.26	0.0047402	766.667
Australia	AUS	2008-10-01	0	0.25	2.66	2.41	0	44.17	3.88			50.72	0.0524448	0.25	0.00492902	525
Australia	AUS	2009-01-01	0	0.3	2.89	2.59	0	44.63	5.05			52.58	0.0549639	0.3	0.00570559	172.727
Australia	AUS	2009-04-01	0	0.24	3	2.76	0	43.24	4.62			50.86	0.0589855	0.24	0.00471884	60
Australia	AUS	2009-07-01	0.01	1.37	5.47	3.94	0.15	43.14	4.43			53.04	0.10313	1.38	0.0260181	430.769
Australia	AUS	2009-10-01	0.03	1.06	3.97	2.81	0.07	42.72	5.71			52.44	0.0757056	1.09	0.0207857	336
Australia	AUS	2010-01-01	0.03	1.04	3.81	2.71	0.03	43.37	5.38			52.57	0.0724748	1.07	0.0203538	256.667
Australia	AUS	2010-04-01	0.03	0.91	4.57	3.6	0.03	41.42	5.86			51.85	0.0881389	0.94	0.0181292	291.667
Australia	AUS	2010-07-01	0.07	1.25	6.1	4.71	0.07	41.76	6.43			54.29	0.11236	1.32	0.0243139	-4.34783
Australia	AUS	2010-10-01	0.15	1.27	6.21	4.74	0.05	38.03	5.97			50.21	0.123681	1.42	0.0282812	30.2752
Australia	AUS	2011-01-01	0.21	1.25	4.67	3.21	0	40.7	6.41			51.81	0.090137	1.46	0.0281799	36.4486
Australia	AUS	2011-04-01	0.18	1.34	4.99	3.41	0.06	41.44	5.28			51.71	0.0964997	1.52	0.0293947	61.7021
Australia	AUS	2011-07-01	0.26	1.66	6.01	3.91	0.18	41.41	5.55			52.97	0.11346	1.92	0.0362469	45.4545
Australia	AUS	2011-10-01	0.45	1.4	4.85	2.85	0.15	39.43	5.79			50.07	0.0968644	1.85	0.0369483	30.2817
Australia	AUS	2012-01-01	0.47	1.57	4.82	2.73	0.05	40.13	6.1			51.05	0.0944172	2.04	0.0399608	39.726
Australia	AUS	2012-04-01	0.36	1.4	5.63	3.86	0.01	39.31	5.83			50.77	0.110892	1.76	0.0346661	15.7895
Australia	AUS	2012-07-01	0.46	1.75	7.98	5.65	0.12	37.51	6.2			51.69	0.154382	2.21	0.0427549	15.1042
Australia	AUS	2012-10-01	0.8	1.61	6.31	3.73	0.17	36.54	6.35			49.21	0.128226	2.41	0.0489738	30.2703
Australia	AUS	2013-01-01	0.84	1.69	6.39	3.8	0.06	37.53	6.47			50.43	0.12671	2.53	0.0501686	24.0196
Australia	AUS	2013-04-01	0.59	1.59	6.66	4.44	0.04	37.63	5.2			49.49	0.134573	2.18	0.0440493	23.8636
Australia	AUS	2013-07-01	0.66	2.57	8.7	5.33	0.14	35.87	5.57			50.18	0.173376	3.23	0.0643683	46.1538
Australia	AUS	2013-10-01	1.09	2.22	8.36	4.98	0.07	35.18	5.65			49.19	0.169953	3.31	0.0672901	37.3444
Australia	AUS	2014-01-01	1.11	2.33	6.73	3.2	0.09	39.54	8.18			54.46	0.123577	3.44	0.0631656	35.9684
Australia	AUS	2014-04-01	0.75	2.35	7.48	4.31	0.07	36.97	8.29			52.74	0.141828	3.1	0.0587789	42.2018
Australia	AUS	2014-07-01	0.82	2.72	7.65	3.91	0.2	39.23	7.79			54.67	0.13993	3.54	0.0647521	9.59752
Australia	AUS	2014-10-01	1.36	2.68	6.64	2.47	0.13	38.02	7.84			52.51	0.126452	4.04	0.0769377	22.0544
Australia	AUS	2015-01-01	1.37	2.71	6.78	2.61	0.09	39.85	7.64			54.3	0.124862	4.08	0.0751381	18.6047
Australia	AUS	2015-04-01	0.96	2.86	7.55	3.67	0.06	39.63	6.65			53.83	0.140256	3.82	0.0709641	23.2258
Australia	AUS	2015-07-01	1.06	3.15	8.8	4.38	0.21	41.07	6.24			56.11	0.156835	4.21	0.0750312	18.9266
Australia	AUS	2015-10-01	1.85	2.87	7.55	2.72	0.11	39.52	6.87			53.94	0.13997	4.72	0.0875046	16.8317
Australia	AUS	2016-01-01	1.89	2.52	8.07	3.55	0.11	41.36	6.88			56.35	0.143212	4.41	0.0782609	8.08824
Australia	AUS	2016-04-01	1.29	3.27	8.42	3.82	0.04	39.29	6.66			54.44	0.154666	4.56	0.0837619	19.3717
Australia	AUS	2016-07-01	1.38	3.46	9.74	4.76	0.14	41.4	5.62			56.77	0.171569	4.84	0.0852563	14.9644
Australia	AUS	2016-10-01	2.23	3.45	10.8	4.94	0.18	38.12	5.08			54	0.2	5.68	0.105185	20.339
Australia	AUS	2017-01-01	2.26	2.97	7.73	2.42	0.08	41.39	7.53			56.73	0.136259	5.23	0.0921911	18.5941
Australia	AUS	2017-04-01	1.54	2.28	7.28	3.4	0.06	38.79	7.62			53.69	0.135593	3.82	0.0711492	-16.2281
Australia	AUS	2017-07-01	1.36	4.34	10.08	4.18	0.2	39.02	7.09			56.2	0.179359	5.7	0.101423	17.7686
Australia	AUS	2017-10-01	2.66	3.27	8.99	2.91	0.15	37.91	7.37			54.27	0.165653	5.93	0.109268	4.40141
Australia	AUS	2018-01-01	2.76	3.54	9.51	3.14	0.07	40.06	6.8			56.38	0.168677	6.3	0.111742	20.4589
Australia	AUS	2018-04-01	2.12	3.48	10.5	4.85	0.05	38.72	6.13			55.35	0.189702	5.6	0.101174	46.5969
Australia	AUS	2018-07-01	2.84	4.85	13.09	5.26	0.14	38.32	5.81			57.22	0.228766	7.69	0.134394	34.9123
Australia	AUS	2018-10-01	4.21	4.03	11.79	3.44	0.11	37.52	5			54.31	0.217087	8.24	0.151722	38.9545
Australia	AUS	2019-01-01	4.35	4.03	11.18	2.71	0.09	39.36	7.14			57.68	0.193828	8.38	0.145284	33.0159
Australia	AUS	2019-04-01	3.09	4.54	11.53	3.84	0.06	37.25	5.96			54.75	0.210594	7.63	0.139361	36.25
Australia	AUS	2019-07-01	4.09	5.37	13.81	4.22	0.13	36.02	7.08			56.91	0.242664	9.46	0.166227	23.0169
Australia	AUS	2019-10-01	6.22	5.11	14.38	2.96	0.09	35.36	5.78			55.52	0.259006	11.33	0.204071	37.5
Australia	AUS	2020-01-01	5.63	4.74	13.62	3.19	0.06	37.19	6.14			56.95	0.239157	10.37	0.18209	23.747
Australia	AUS	2020-04-01	4.05	5.13	13.46	4.24	0.04	34.99	5.85			54.3	0.247882	9.18	0.169061	20.3145
Australia	AUS	2020-07-01	4.9	6.07	14.87	3.81	0.09	35.7	5.99			56.56	0.262907	10.97	0.193953	15.9619
Australia	AUS	2020-10-01	7.63	6.26	17.05	3.07	0.09	33.19	4.5			54.74	0.311472	13.89	0.253745	22.5949
Australia	AUS	2021-01-01	7.41	6.14	16.83	3.23	0.05	34.79	3.98			55.6	0.302698	13.55	0.243705	30.6654
Australia	AUS	2021-04-01	5.15	5.87	15.57	4.51	0.04	34.84	5.47			55.91	0.278483	11.02	0.197102	20.0436
Australia	AUS	2021-07-01	6.19	7.7	18.3	4.31	0.1	34.52	4.72			57.58	0.317819	13.89	0.24123	26.618
Australia	AUS	2021-10-01	9.51	6.65	20	3.75	0.09	31.49	3.54			55.05	0.363306	16.16	0.293551	16.3427
Australia	AUS	2022-01-01	9.59	6.87	19.82	3.32	0.04	33.71	4.38			57.91	0.342255	16.46	0.284234	21.476
Australia	AUS	2022-04-01	5.89	7.16	17.97	4.89	0.03	32.18	6.47			56.67	0.317099	13.05	0.230281	18.4211
Australia	AUS	2022-07-01	7.06	8.18	20.01	4.7	0.07	33.16	6.17			59.35	0.337152	15.24	0.256782	9.71922
Australia	AUS	2022-10-01	11.32	7.24	22.4	3.74	0.1	28.74	3.81			54.95	0.407643	18.56	0.337762	14.8515
Australia	AUS	2023-01-01	11.6	7.06	21.89	3.2	0.03	32.27	4			58.16	0.376376	18.66	0.320839	13.3657
Australia	AUS	2023-04-01	7.66	7.9	19.9	4.29	0.05	31.92	5.29			57.13	0.348328	15.56	0.272361	19.2337
Australia	AUS	2023-07-01	9.26	8.08	21.99	4.54	0.11	31.15	4.72			57.86	0.380055	17.34	0.299689	13.7795
Australia	AUS	2023-10-01	13.4	7.9	24.69	3.25	0.14	29.15	3.26			57.1	0.432399	21.3	0.37303	14.7629
Australia	AUS	2024-01-01	13.25	7.53	23.78	2.94	0.06	33	3.98			60.79	0.391183	20.78	0.341833	11.3612
Australia	AUS	2024-04-01	8.41	6.63	18.64	3.51	0.09	33.93	5.45			58.03	0.321213	15.04	0.259176	-3.3419
Australia	AUS	2024-07-01	9.76	9.82	23.26	3.54	0.14	31.54	5.1			59.9	0.388314	19.58	0.326878	12.9181
Australia	AUS	2024-10-01	15.35	7.92	26.98	3.55	0.16	27.96	3.83			58.8	0.458844	23.27	0.395748	9.24883
Australia	AUS	2025-01-01	14.83	8.61	26.21	2.7	0.07	31.29	3.75			61.26	0.427849	23.44	0.382631	12.8008
Australia	AUS	2025-04-01	9.72	8.51	21.94	3.66	0.05	31.95	4.87			58.76	0.373383	18.23	0.310245	21.2101
Australia	AUS	2025-07-01	11.04	11.23	25.88	3.42	0.19	31.53	4.74			62.15	0.416412	22.27	0.358327	13.7385
Australia	AUS	2025-10-01	17.06	10.04	30.42	3.13	0.19	26.68	2.95			60.05	0.506578	27.1	0.451291	16.459
Australia	AUS	2026-01-01	16.25	9.43	28.96	3.08	0.2	29.69	3.18			61.83	0.468381	25.68	0.415332	9.55631
Australia	AUS	2026-04-01	4.23	3	8.29	1.03	0.03	9.37	1.01			18.67	0.444028	7.23	0.387252	-60.3401
Austria	AUT	2015-01-01	0.16	1.53	10.29	7.93	0.67	0.98	3.38		0	15.17	0.678312	1.69	0.111404
Austria	AUT	2015-04-01	0.31	1.2	12.59	10.42	0.66	0.22	1.27		0	16.18	0.778121	1.51	0.0933251
Austria	AUT	2015-07-01	0.33	1.07	9.82	7.82	0.6	0.15	1.08		0	13.1	0.749618	1.4	0.10687
Austria	AUT	2015-10-01	0.15	1.12	8.93	6.97	0.69	0.49	2.59		0	13.17	0.678056	1.27	0.0964313
Austria	AUT	2016-01-01	0.18	1.55	10.93	8.53	0.67	0.58	2.99		0	14.76	0.740515	1.73	0.117209	2.36686
Austria	AUT	2016-04-01	0.36	1.23	15.24	13.02	0.63	0.13	0.7		0	16.34	0.932681	1.59	0.0973072	5.29801
Austria	AUT	2016-07-01	0.39	0.94	15.01	13.06	0.62	0	0.58		0	15.86	0.946406	1.33	0.0838588	-5
Austria	AUT	2016-10-01	0.16	1.61	11.29	8.9	0.62	0.75	3.59		0	15.9	0.710063	1.77	0.111321	39.3701
Austria	AUT	2017-01-01	0.23	1.72	9.91	7.29	0.67	0.67	4.68		0	15.52	0.638531	1.95	0.125644	12.7168
Austria	AUT	2017-04-01	0.46	1.51	12.77	10.15	0.65	0.1	1.09		0	14.23	0.8974	1.97	0.13844	23.8994
Austria	AUT	2017-07-01	0.42	1.44	14.46	11.98	0.62	0.05	1.09		0	15.87	0.911153	1.86	0.117202	39.8496
Austria	AUT	2017-10-01	0.19	2.06	12.2	9.28	0.67	0.6	2.88		0	15.95	0.76489	2.25	0.141066	27.1186
Austria	AUT	2018-01-01	0.22	1.62	11.8	9.28	0.68	0.67	3.33		0	16.06	0.734745	1.84	0.11457	-5.64103
Austria	AUT	2018-04-01	0.5	1.52	14.92	12.28	0.62	0.05	0.54		0	15.78	0.945501	2.02	0.12801	2.53807
Austria	AUT	2018-07-01	0.51	1.16	10.96	8.67	0.62	0.07	1.03		0	12.33	0.888889	1.67	0.135442	-10.2151
Austria	AUT	2018-10-01	0.21	2.11	10.65	7.67	0.66	0.63	3.43		0	14.98	0.710948	2.32	0.154873	3.11111
Austria	AUT	2019-01-01	0.28	2.49	12.62	9.18	0.67	0.49	3.48		0	16.85	0.748961	2.77	0.164392	50.5435
Austria	AUT	2019-04-01	0.53	2.16	16.06	12.79	0.58	0.25	0.79		0	17.37	0.924583	2.69	0.154865	33.1683
Austria	AUT	2019-07-01	0.51	1.15	12.74	10.59	0.49	0.16	2.12		0	15.29	0.833224	1.66	0.108568	-0.598802
Austria	AUT	2019-10-01	0.24	2.18	11.25	8.39	0.44	0.36	3.77		0	15.65	0.71885	2.42	0.154633	4.31034
Austria	AUT	2020-01-01	0.34	2.39	11.71	8.52	0.46	0.34	3.76		0	16.07	0.728687	2.73	0.169882	-1.44404
Austria	AUT	2020-04-01	0.63	1.81	13.9	11.02	0.44	0	0.58		0	14.75	0.942373	2.44	0.165424	-9.29368
Austria	AUT	2020-07-01	0.63	1.22	14.72	12.47	0.4	0	1.24		0	16.23	0.906962	1.85	0.113986	11.4458
Austria	AUT	2020-10-01	0.26	1.82	11.94	9.44	0.42	0	3.46		0	15.67	0.761966	2.08	0.132738	-14.0496
Austria	AUT	2021-01-01	0.42	1.75	10.47	7.9	0.4	0	3.71		0	14.44	0.725069	2.17	0.150277	-20.5128
Austria	AUT	2021-04-01	0.79	1.98	14.51	11.37	0.37	0	1.2		0	15.98	0.90801	2.77	0.173342	13.5246
Austria	AUT	2021-07-01	0.81	1.2	14.61	12.25	0.35	0	0.33		0	15.21	0.960552	2.01	0.13215	8.64865
Austria	AUT	2021-10-01	0.4	2.03	10.41	7.64	0.34	0	4.16		0	14.84	0.701482	2.43	0.163747	16.8269
Austria	AUT	2022-01-01	0.63	2.57	11.74	7.84	0.7	0	4.35		0	16.35	0.718043	3.2	0.195719	47.4654
Austria	AUT	2022-04-01	1.09	1.61	14.31	10.96	0.65	0	1.42		0	16	0.894375	2.7	0.16875	-2.52708
Austria	AUT	2022-07-01	1.09	1.4	12.26	9.14	0.63	0	1.11		0	13.64	0.898827	2.49	0.182551	23.8806
Austria	AUT	2022-10-01	0.53	1.6	10.68	8.01	0.54	0	3.27		0	14.22	0.751055	2.13	0.149789	-12.3457
Austria	AUT	2023-01-01	0.76	2.58	11.91	8.03	0.54	0	2.93		0	15.1	0.788742	3.34	0.221192	4.375
Austria	AUT	2023-04-01	1.62	1.7	15.57	12	0.25	0	0.91		0	16.75	0.929552	3.32	0.198209	22.963
Austria	AUT	2023-07-01	1.9	1.51	14.71	11.05	0.25	0	0.43		0	15.41	0.954575	3.41	0.221285	36.9478
Austria	AUT	2023-10-01	0.93	2.48	13.74	9.97	0.36	0	2.17		0	16.18	0.849197	3.41	0.210754	60.0939
Austria	AUT	2024-01-01	1.27	3.23	15.23	10.31	0.42	0	2.24		0	17.73	0.858996	4.5	0.253807	34.7305
Austria	AUT	2024-04-01	2.54	1.95	18	13	0.51	0	0.26		0	18.53	0.971398	4.49	0.24231	35.241
Austria	AUT	2024-07-01	2.64	1.74	16.77	12	0.39	0	0.19		0	17.23	0.973302	4.38	0.254208	28.4457
Austria	AUT	2024-10-01	1.19	2.45	14.08	9.83	0.61	0	3.37		0	17.72	0.794582	3.64	0.205418	6.74487
Austria	AUT	2025-01-01	1.71	2.19	12.27	7.81	0.56	0	3.91		0	16.44	0.74635	3.9	0.237226	-13.3333
Austria	AUT	2025-04-01	3.49	2.06	16.52	10.5	0.47	0	0.53		0	17.32	0.953811	5.55	0.320439	23.608
Austria	AUT	2025-07-01	3.19	1.86	16.68	11.29	0.34	0	0.18		0	17.13	0.97373	5.05	0.294804	15.2968
Austria	AUT	2025-10-01	1.42	2.43	12.16	7.76	0.55	0	2.64		0	15.07	0.806901	3.85	0.255474	5.76923
Austria	AUT	2026-01-01	1.92	2.39	12.13	7.28	0.54	0	3.44		0	15.83	0.766267	4.31	0.272268	10.5128
Austria	AUT	2026-04-01	1.22	0.83	5.13	2.92	0.16	0	0.46		0	5.68	0.903169	2.05	0.360915	-63.0631
Azerbaijan	AZE	2019-01-01	0	0	0.37	0.37	0	0	5.91	0		6.28	0.0589172	0	0
Azerbaijan	AZE	2019-04-01	0.02	0	0.76	0.74	0	0	4.93	0		5.69	0.133568	0.02	0.00351494
Azerbaijan	AZE	2019-07-01	0.02	0	0.55	0.53	0	0	5.64	0		6.19	0.088853	0.02	0.00323102
Azerbaijan	AZE	2019-10-01	0	0	0.3	0.3	0	0	5.96	0		6.26	0.0479233	0	0
Azerbaijan	AZE	2020-01-01	0	0	0.27	0.27	0	0	6.15	0		6.42	0.0420561	0	0
Azerbaijan	AZE	2020-04-01	0.03	0	0.6	0.57	0	0	4.92	0		5.52	0.108696	0.03	0.00543478	50
Azerbaijan	AZE	2020-07-01	0.03	0	0.33	0.3	0	0	5.66	0		5.99	0.0550918	0.03	0.00500835	50
Azerbaijan	AZE	2020-10-01	0	0	0.21	0.21	0	0	5.62	0		5.83	0.0360206	0	0
Azerbaijan	AZE	2021-01-01	0	0	0.27	0.27	0	0	5.95	0		6.37	0.0423862	0	0
Azerbaijan	AZE	2021-04-01	0.03	0	0.69	0.66	0	0	5.03	0		5.85	0.117949	0.03	0.00512821	0
Azerbaijan	AZE	2021-07-01	0.02	0	0.27	0.25	0	0	6.45	0		6.88	0.0392442	0.02	0.00290698	-33.3333
Azerbaijan	AZE	2021-10-01	0	0	0.3	0.3	0	0	6.15	0		6.6	0.0454545	0	0
Azerbaijan	AZE	2022-01-01	0.01	0	0.32	0.31	0	0	6.33	0		6.68	0.0479042	0.01	0.00149701
Azerbaijan	AZE	2022-04-01	0.03	0	0.88	0.85	0	0	5	0		5.91	0.1489	0.03	0.00507614	0
Azerbaijan	AZE	2022-07-01	0.03	0	0.57	0.54	0	0	6.95	0		7.55	0.0754967	0.03	0.00397351	50
Azerbaijan	AZE	2022-10-01	0	0	0.24	0.24	0	0	6.66	0		6.93	0.034632	0	0
Azerbaijan	AZE	2023-01-01	0.01	0	0.34	0.33	0	0	6.82	0		7.19	0.0472879	0.01	0.00139082	0
Azerbaijan	AZE	2023-04-01	0.03	0	0.76	0.73	0	0	4.91	0		5.7	0.133333	0.03	0.00526316	0
Azerbaijan	AZE	2023-07-01	0.03	0	0.57	0.54	0	0	6.51	0		7.11	0.0801688	0.03	0.00421941	0
Azerbaijan	AZE	2023-10-01	0	0	0.35	0.35	0	0	6.77	0		7.15	0.048951	0	0
Azerbaijan	AZE	2024-01-01	0.02	0	0.59	0.57	0	0	6	0		6.62	0.0891239	0.02	0.00302115	100
Azerbaijan	AZE	2024-04-01	0.03	0	1.48	1.45	0	0	4.51	0		5.99	0.247078	0.03	0.00500835	0
Azerbaijan	AZE	2024-07-01	0.2	0	1.41	1.21	0	0	6.67	0		8.11	0.173859	0.2	0.0246609	566.667
Azerbaijan	AZE	2024-10-01	0.07	0	0.71	0.64		0	5.33	0		6.05	0.117355	0.07	0.0115702
Azerbaijan	AZE	2025-01-01	0.12	0	0.99	0.87	0	0	5.78	0		6.8	0.145588	0.12	0.0176471	500
Azerbaijan	AZE	2025-04-01	0	0	1.2	1.2		0	4.64	0		5.84	0.205479	0	0	-100
Azerbaijan	AZE	2025-07-01	0	0	0.73	0.73		0	6.62	0		7.38	0.098916	0	0	-100
Azerbaijan	AZE	2025-10-01	0	0	0.61	0.61	0	0	5.62	0		6.25	0.0976	0	0	-100
Azerbaijan	AZE	2026-01-01	0.08	0.25	1.33	1	0	0	5.53	0		6.89	0.193033	0.33	0.0478955	175
Bangladesh	BGD	2019-01-01	0.01		0.14	0.13		0.34	11.5			13.83	0.0101229	0.01	0.000723066
Bangladesh	BGD	2019-04-01	0		0.1	0.1		0.52	13.11			18.2	0.00549451	0	0
Bangladesh	BGD	2019-07-01	0		0.39	0.39		0.65	13.92			19.83	0.0196672	0	0
Bangladesh	BGD	2019-10-01	0.01		0.2	0.19		0.55	12.76			15.23	0.013132	0.01	0.000656599
Bangladesh	BGD	2020-01-01	0.02		0.15	0.13		0.92	12.33			15	0.01	0.02	0.00133333	100
Bangladesh	BGD	2020-04-01	0.03		0.15	0.12		1.16	12.23			16.28	0.00921376	0.03	0.00184275
Bangladesh	BGD	2020-07-01	0		0.22	0.22		1.41	12.51			19.98	0.011011	0	0
Bangladesh	BGD	2020-10-01	0.01		0.24	0.23		1.31	11.33			16.51	0.0145366	0.01	0.000605694	0
Bangladesh	BGD	2021-01-01	0.05		0.17	0.12		1.22	10.09			15.52	0.0109536	0.05	0.00322165	150
Bangladesh	BGD	2021-04-01	0.06		0.14	0.08		1.54	14.08			20.95	0.00668258	0.06	0.00286396	100
Bangladesh	BGD	2021-07-01	0.07		0.32	0.25		1.34	14.05			21.94	0.0145852	0.07	0.00319052
Bangladesh	BGD	2021-10-01	0.06		0.29	0.23		1.13	11.84			17.62	0.0164586	0.06	0.00340522	500
Bangladesh	BGD	2022-01-01	0.1		0.24	0.14		1.33	9.65			17.21	0.0139454	0.1	0.00581058	100
Bangladesh	BGD	2022-04-01	0.1		0.23	0.13		2.04	12.69			22.66	0.01015	0.1	0.00441306	66.6667
Bangladesh	BGD	2022-07-01	0.11		0.4	0.29		2.64	12.58			23.44	0.0170648	0.11	0.00469283	57.1429
Bangladesh	BGD	2022-10-01	0.11		0.32	0.21		1.86	10.39			17.38	0.018412	0.11	0.00632911	83.3333
Bangladesh	BGD	2023-01-01	0.22		0.28	0.06		2.43	10.84			17.27	0.0162131	0.22	0.0127389	120
Bangladesh	BGD	2023-04-01	0.13		0.18	0.05		2.44	13.18			20.74	0.00867888	0.13	0.00626808	30
Bangladesh	BGD	2023-07-01	0.17	0.01	0.5	0.32		5.9	13.5			24.45	0.0204499	0.18	0.00736196	63.6364
Bangladesh	BGD	2023-10-01	0.19	0	0.45	0.26		6.25	9.92			18.36	0.0245098	0.19	0.0103486	72.7273
Bangladesh	BGD	2024-01-01	0.21	0.03	0.35	0.11		6.96	9.71			18.76	0.0186567	0.24	0.0127932	9.09091
Bangladesh	BGD	2024-04-01	0.26	0.03	0.41	0.12		7.99	13.59			25.77	0.01591	0.29	0.0112534	123.077
Bangladesh	BGD	2024-07-01	0.26	0.04	0.75	0.45		7.67	11.45			23.8	0.0315126	0.3	0.012605	66.6667
Bangladesh	BGD	2024-10-01	0.33	0.01	0.59	0.25		5.49	10.9			19.12	0.0308577	0.34	0.0177824	78.9474
Bangladesh	BGD	2025-01-01	0.35	0	0.35	0		5.35	10.28			19.17	0.0182577	0.35	0.0182577	45.8333
Bangladesh	BGD	2025-04-01	0.38	0.02	0.55	0.15		7.85	12.45			24.29	0.0226431	0.4	0.0164677	37.931
Bangladesh	BGD	2025-07-01	0.33	0.02	0.82	0.47		9.19	12.56			25.88	0.0316847	0.35	0.013524	16.6667
Bangladesh	BGD	2025-10-01	0.34	0	0.6	0.26		7.67	9.81			19.7	0.0304569	0.34	0.0172589	-1.11022e-14
Bangladesh	BGD	2026-01-01	0.34	0.02	0.5	0.14		7.21	9.49			18.39	0.0271887	0.36	0.0195759	2.85714
Belarus	BLR	2019-01-01	0.07	0.09	0.37	0.18	0.03	0	9.27	0		10.64	0.0347744	0.16	0.0150376
Belarus	BLR	2019-04-01	0.12	0.09	0.45	0.21	0.03	0	7.99	0		9.41	0.0478215	0.21	0.0223167
Belarus	BLR	2019-07-01	0.12	0.08	0.37	0.14	0.03	0	8.55	0		9.9	0.0373737	0.2	0.020202
Belarus	BLR	2019-10-01	0.06	0.12	0.42	0.21	0.03	0	9.58	0		11.03	0.038078	0.18	0.0163191
Belarus	BLR	2020-01-01	0.09	0.12	0.55	0.28	0.06	0	8.47	0		10.44	0.052682	0.21	0.0201149	31.25
Belarus	BLR	2020-04-01	0.15	0.12	0.6	0.27	0.06	0	7.06	0		8.98	0.0668151	0.27	0.0300668	28.5714
Belarus	BLR	2020-07-01	0.12	0.09	0.48	0.21	0.06	0	7.51	0		9.3	0.0516129	0.21	0.0225806	5
Belarus	BLR	2020-10-01	0.06	0.12	0.46	0.22	0.06	0	8.31	0.34		10.62	0.0433145	0.18	0.0169492	0
Belarus	BLR	2021-01-01	0.09	0.11	0.51	0.25	0.06	0	7.99	1.43		11.34	0.0449735	0.2	0.0176367	-4.7619
Belarus	BLR	2021-04-01	0.15	0.11	0.59	0.27	0.06	0	6.25	1.63		9.61	0.0613944	0.26	0.0270552	-3.7037
Belarus	BLR	2021-07-01	0.06	0.03	0.21	0.06	0.06	0	7.26	0.32		9.04	0.0232301	0.09	0.00995575	-57.1429
Belarus	BLR	2021-10-01	0.09	0.13	0.52	0.24	0.06	0	7.32	2.4		11.56	0.0449827	0.22	0.0190311	22.2222
Belarus	BLR	2022-01-01	0.13	0.13	0.58	0.26	0.06	0	7.24	2.53		11.57	0.0501296	0.26	0.0224719	30
Belarus	BLR	2022-04-01	0.16	0.12	0.61	0.27	0.06	0	6.5	0.7		8.95	0.0681564	0.28	0.0312849	7.69231
Belarus	BLR	2022-07-01	0.14	0.09	0.47	0.18	0.06	0	7.36	0		8.97	0.0523969	0.23	0.025641	155.556
Belarus	BLR	2022-10-01	0.09	0.1	0.47	0.22	0.06	0	7.47	1.45		10.69	0.0439663	0.19	0.0177736	-13.6364
Belarus	BLR	2023-01-01	0.11	0.13	0.65	0.27	0.14	0	6.7	2.55		11.06	0.0587703	0.24	0.0216998	-7.69231
Belarus	BLR	2023-04-01	0.13	0.09	0.55	0.21	0.12	0	4.89	3.23		9.65	0.0569948	0.22	0.0227979	-21.4286
Belarus	BLR	2023-07-01	0.12	0.09	0.45	0.15	0.09	0	5.32	3.05		9.86	0.0456389	0.21	0.0212982	-8.69565
Belarus	BLR	2023-10-01	0.09	0.12	0.61	0.25	0.15	0	6.77	2.92		11.55	0.0528139	0.21	0.0181818	10.5263
Belarus	BLR	2024-01-01	0.11	0.12	0.64	0.26	0.15	0	5.46	5.02		12.15	0.0526749	0.23	0.01893	-4.16667
Belarus	BLR	2024-04-01	0.15	0.12	0.69	0.27	0.15	0	4.31	4.42		10.31	0.0669253	0.27	0.0261882	22.7273
Belarus	BLR	2024-07-01	0.15	0.09	0.54	0.18	0.12	0	5.46	3.21		10.17	0.0530973	0.24	0.0235988	14.2857
Belarus	BLR	2024-10-01	0.09	0.06	0.3	0.15		0	6.9	3.05		11.43	0.0262467	0.15	0.0131234	-28.5714
Belarus	BLR	2025-01-01	0.09	0.12	0.66	0.27	0.18	0	6.46	3.67		11.95	0.0552301	0.21	0.0175732	-8.69565
Belarus	BLR	2025-04-01	0.06	0.09	0.36	0.21		0	3.72	5.02		10.02	0.0359281	0.15	0.0149701	-44.4444
Belarus	BLR	2025-07-01	0.06	0.09	0.33	0.18		0	3.97	4.58		9.84	0.0335366	0.15	0.0152439	-37.5
Belarus	BLR	2025-10-01	0.16	0.24	1.04	0.49	0.15	0	6.25	3.71		12.22	0.0851064	0.4	0.0327332	166.667
Belarus	BLR	2026-01-01	0.09	0.16	0.58	0.18	0.15	0	7.02	3.39		12.21	0.047502	0.25	0.020475	19.0476
Belgium	BEL	2015-01-01	0.43	1.45	2.6	0.08	0.64	0.61	5.76	7.58	0	18.57	0.140011	1.88	0.101239
Belgium	BEL	2015-04-01	1.26	1.03	2.92	0.05	0.58	0.23	4.27	6.09	0	15.22	0.191853	2.29	0.15046
Belgium	BEL	2015-07-01	1.03	0.99	2.61	0.01	0.58	0.62	5.02	4.34	0	14.18	0.184062	2.02	0.142454
Belgium	BEL	2015-10-01	0.31	1.63	2.59	0.03	0.62	0.68	6.03	6.82	0	17.93	0.144451	1.94	0.108199
Belgium	BEL	2016-01-01	0.44	1.67	2.87	0.08	0.68	0.33	5.1	12.23	0	22.37	0.128297	2.11	0.0943228	12.234
Belgium	BEL	2016-04-01	1.07	0.98	2.79	0.08	0.66	0	3.91	10.05	0	18.3	0.152459	2.05	0.112022	-10.4803
Belgium	BEL	2016-07-01	1.1	0.92	2.65	0.03	0.6	0	4.63	10.54	0	19.22	0.137877	2.02	0.105099	0
Belgium	BEL	2016-10-01	0.31	1.18	2.11	0.02	0.6	0	7.48	8.61	0	20	0.1055	1.49	0.0745	-23.1959
Belgium	BEL	2017-01-01	0.43	1.45	2.64	0.06	0.7	0	6.22	10.48	0	21.29	0.124002	1.88	0.0883044	-10.9005
Belgium	BEL	2017-04-01	1.18	1.05	2.93	0.02	0.68	0	4.86	8.38	0	17.77	0.164885	2.23	0.125492	8.78049
Belgium	BEL	2017-07-01	1	1.13	2.76	0.01	0.62	0	4.33	11.81	0	20.56	0.134241	2.13	0.103599	5.44554
Belgium	BEL	2017-10-01	0.27	1.93	2.97	0.05	0.72	0	6.42	9.51	0	20.89	0.142173	2.2	0.105314	47.651
Belgium	BEL	2018-01-01	0.47	1.99	3.21	0.08	0.67	0	5.08	10.65	0	21	0.152857	2.46	0.117143	30.8511
Belgium	BEL	2018-04-01	1.34	1.19	3.28	0.04	0.71	0	3.91	7.27	0	16.16	0.20297	2.53	0.156559	13.4529
Belgium	BEL	2018-07-01	1.32	1.23	3.17	0	0.62	0	5.46	5.51	0	15.83	0.200253	2.55	0.161087	19.7183
Belgium	BEL	2018-10-01	0.41	2.11	3.15	0.02	0.61	0	7.86	3.82	0	16.99	0.185403	2.52	0.148323	14.5455
Belgium	BEL	2019-01-01	0.49	2.3	3.45	0.06	0.6	0	6.16	9.28	0	21.08	0.163662	2.79	0.132353	13.4146
Belgium	BEL	2019-04-01	1.36	1.53	3.33	0.03	0.41	0	4.82	10.14	0	20.05	0.166085	2.89	0.14414	14.2292
Belgium	BEL	2019-07-01	1.28	1.76	3.73	0	0.69	0	5.68	11.88	0	22.91	0.162811	3.04	0.132693	19.2157
Belgium	BEL	2019-10-01	0.39	2.72	3.84	0.05	0.68	0	6.83	10.12	0	22.93	0.167466	3.11	0.13563	23.4127
Belgium	BEL	2020-01-01	0.61	3.72	4.98	0.07	0.58	0	5.89	8.98	0	21.79	0.228545	4.33	0.198715	55.1971
Belgium	BEL	2020-04-01	1.84	1.89	4.44	0.04	0.67	0	4.84	8.14	0	19.07	0.232826	3.73	0.195595	29.0657
Belgium	BEL	2020-07-01	1.45	1.92	4.03	0	0.66	0	7.07	6.83	0	19.63	0.205298	3.37	0.171676	10.8553
Belgium	BEL	2020-10-01	0.38	3.76	4.65	0.04	0.47	0	5.97	8.84	0	21.63	0.214979	4.14	0.191401	33.119
Belgium	BEL	2021-01-01	0.74	3.51	4.9	0.09	0.56	0	5.94	12.3	0	25.28	0.193829	4.25	0.168117	-1.84758
Belgium	BEL	2021-04-01	1.88	2.12	4.48	0.05	0.43	0	4.85	11.58	0	22.72	0.197183	4	0.176056	7.23861
Belgium	BEL	2021-07-01	1.6	2.02	4.25	0.05	0.58	0	3.2	12.01	0	21.18	0.200661	3.62	0.170916	7.4184
Belgium	BEL	2021-10-01	0.46	3.47	4.59	0.04	0.62	0	5.17	12.07	0	23.72	0.193508	3.93	0.165683	-5.07246
Belgium	BEL	2022-01-01	0.88	3.47	4.84	0.02	0.47	0	4.88	11.75	0	23.59	0.205172	4.35	0.1844	2.35294
Belgium	BEL	2022-04-01	2.47	2.27	5.25	0.04	0.47	0	3.82	10.25	0	21.1	0.248815	4.74	0.224645	18.5
Belgium	BEL	2022-07-01	2.34	1.72	4.63	0	0.57	0	5.92	9.65	0	21.85	0.211899	4.06	0.185812	12.1547
Belgium	BEL	2022-10-01	0.73	3.82	5.01	0.02	0.44	0	5.4	10.09	0	22.48	0.222865	4.55	0.202402	15.7761
Belgium	BEL	2023-01-01	0.92	4.37	5.79	0.08	0.42	0	5.37	9.04	0	22.42	0.258252	5.29	0.23595	21.6092
Belgium	BEL	2023-04-01	2.98	2.45	5.61	0.05	0.13	0	3.75	6.8	0	17.95	0.312535	5.43	0.302507	14.557
Belgium	BEL	2023-07-01	2.55	2.51	5.29	0	0.23	0	3.52	7.3	0	17.87	0.296027	5.06	0.283156	24.6305
Belgium	BEL	2023-10-01	0.75	5.06	6.03	0.06	0.16	0	2.63	8.14	0	19.04	0.316702	5.81	0.305147	27.6923
Belgium	BEL	2024-01-01	1.07	4.21	5.45	0.03	0.14	0	2.98	7.9	0	17.95	0.303621	5.28	0.29415	-0.189036
Belgium	BEL	2024-04-01	3.03	2.78	6.06	0.08	0.17	0	2.27	7.25	0	17.65	0.343343	5.81	0.329178	6.99816
Belgium	BEL	2024-07-01	3.29	2.54	6.06	0.04	0.19	0	2.17	7.66	0	17.64	0.343537	5.83	0.330499	15.2174
Belgium	BEL	2024-10-01	0.92	3.48	4.67	0.08	0.19	0	3.73	6.95	0	17.42	0.268083	4.4	0.252583	-24.2685
Belgium	BEL	2025-01-01	1.68	2.7	4.63	0.08	0.17	0	4.4	7.72	0	18.87	0.245363	4.38	0.232114	-17.0455
Belgium	BEL	2025-04-01	3.95	2.72	6.86	0.02	0.17	0	2.52	5.08	0	16.27	0.421635	6.67	0.409957	14.8021
Belgium	BEL	2025-07-01	3.55	2.63	6.47	0.01	0.28	0	2.17	4.89	0	15.31	0.4226	6.18	0.403658	6.00343
Belgium	BEL	2025-10-01	1.02	4.62	5.88	0.01	0.23	0	3.59	4.93	0	17.09	0.344061	5.64	0.330018	28.1818
Belgium	BEL	2026-01-01	1.74	4.48	6.4	0.01	0.17	0	3.78	4.47	0	17.66	0.362401	6.22	0.352208	42.0091
Belgium	BEL	2026-04-01	1.44	1.01	2.61	0.01	0.15	0	1.05	0.09	0	4.17	0.625899	2.45	0.58753	-63.2684
Bolivia	BOL	2019-01-01	0.03	0.01	0.95	0.9	0.01		1.38			2.33	0.407725	0.04	0.0171674
Bolivia	BOL	2019-04-01	0.03	0.02	0.86	0.8	0.01		1.47			2.33	0.369099	0.05	0.0214592
Bolivia	BOL	2019-07-01	0.04	0.03	0.79	0.64	0.08		1.61			2.4	0.329167	0.07	0.0291667
Bolivia	BOL	2019-10-01	0.06	0.01	1.02	0.9	0.05		1.43			2.45	0.416327	0.07	0.0285714
Bolivia	BOL	2020-01-01	0.06	0	1.09	1.03	0		1.38			2.47	0.441296	0.06	0.0242915	50
Bolivia	BOL	2020-04-01	0.06	0.01	0.75	0.67	0.01		1.18			1.93	0.388601	0.07	0.0362694	40
Bolivia	BOL	2020-07-01	0.06	0.03	0.8	0.64	0.07		1.42			2.22	0.36036	0.09	0.0405405	28.5714
Bolivia	BOL	2020-10-01	0.06	0.02	0.74	0.61	0.05		1.86			2.6	0.284615	0.08	0.0307692	14.2857
Bolivia	BOL	2021-01-01	0.08	0	1.12	1.04	0		1.27			2.39	0.468619	0.08	0.0334728	33.3333
Bolivia	BOL	2021-04-01	0.09	0.02	0.93	0.8	0.02		1.47			2.4	0.3875	0.11	0.0458333	57.1429
Bolivia	BOL	2021-07-01	0.09	0.04	0.9	0.65	0.12		1.61			2.51	0.358566	0.13	0.0517928	44.4444
Bolivia	BOL	2021-10-01	0.08	0.05	0.91	0.74	0.04		1.75			2.66	0.342105	0.13	0.0488722	62.5
Bolivia	BOL	2022-01-01	0.09	0.11	1.14	0.94	0		1.5			2.64	0.431818	0.2	0.0757576	150
Bolivia	BOL	2022-04-01	0.09	0.12	1.07	0.83	0.03		1.46			2.53	0.422925	0.21	0.083004	90.9091
Bolivia	BOL	2022-07-01	0.09	0.15	0.96	0.64	0.08		1.69			2.65	0.362264	0.24	0.090566	84.6154
Bolivia	BOL	2022-10-01	0.09	0.08	0.65	0.46	0.02		2.17			2.82	0.230496	0.17	0.0602837	30.7692
Bolivia	BOL	2023-01-01	0.09	0.09	0.86	0.68	0		1.89			2.75	0.312727	0.18	0.0654545	-10
Bolivia	BOL	2023-04-01	0.09	0.1	0.71	0.52	0		1.93			2.64	0.268939	0.19	0.0719697	-9.52381
Bolivia	BOL	2023-07-01	0.09	0.15	0.73	0.41	0.08		2.08			2.81	0.259786	0.24	0.0854093	0
Bolivia	BOL	2023-10-01	0.09	0.15	0.99	0.72	0.03		2.09			3.08	0.321429	0.24	0.0779221	41.1765
Bolivia	BOL	2024-01-01	0.08	0.11	1.04	0.85	0		1.95			2.99	0.347826	0.19	0.0635452	5.55556
Bolivia	BOL	2024-04-01	0.09	0.14	1.01	0.75	0.03		1.8			2.81	0.359431	0.23	0.0818505	21.0526
Bolivia	BOL	2024-07-01	0.09	0.15	0.87	0.57	0.06		1.94			2.81	0.309609	0.24	0.0854093	2.22045e-14
Bolivia	BOL	2024-10-01	0.09	0.09	0.88	0.69	0.01		2.2			3.08	0.285714	0.18	0.0584416	-25
Bolivia	BOL	2025-01-01	0.08	0.04	1.1	0.98	0		1.85			2.95	0.372881	0.12	0.040678	-36.8421
Bolivia	BOL	2025-04-01	0.09	0.08	1.13	0.94	0.02		1.7			2.83	0.399293	0.17	0.0600707	-26.087
Bolivia	BOL	2025-07-01	0.09	0.09	0.96	0.71	0.07		2			2.96	0.324324	0.18	0.0608108	-25
Bolivia	BOL	2025-10-01	0.09	0.08	0.93	0.73	0.03		2.12			3.05	0.304918	0.17	0.0557377	-5.55556
Bolivia	BOL	2026-01-01	0.09	0.03	0.99	0.87	0		2.08			3.07	0.322476	0.12	0.0390879	0
Bosnia Herzegovina	BIH	2019-01-01	0	0.06	1.33	1.27		2.62				3.95	0.336709	0.06	0.0151899
Bosnia Herzegovina	BIH	2019-04-01	0	0.03	1.73	1.7		1.78				3.51	0.492877	0.03	0.00854701
Bosnia Herzegovina	BIH	2019-07-01	0	0.03	0.99	0.96		2.81				3.8	0.260526	0.03	0.00789474
Bosnia Herzegovina	BIH	2019-10-01	0	0.05	1.97	1.92		2.5				4.47	0.440716	0.05	0.0111857
Bosnia Herzegovina	BIH	2020-01-01	0	0.05	1.44	1.39		2.97				4.41	0.326531	0.05	0.0113379	-16.6667
Bosnia Herzegovina	BIH	2020-04-01	0	0.04	0.63	0.59		2.31				2.94	0.214286	0.04	0.0136054	33.3333
Bosnia Herzegovina	BIH	2020-07-01	0	0.03	0.83	0.8		2.55				3.38	0.245562	0.03	0.00887574	0
Bosnia Herzegovina	BIH	2020-10-01	0	0.03	1.43	1.4		2.67				4.1	0.34878	0.03	0.00731707	-40
Bosnia Herzegovina	BIH	2021-01-01	0	0.07	2.48	2.41		2.69				5.17	0.479691	0.07	0.0135397	40
Bosnia Herzegovina	BIH	2021-04-01	0	0.05	1.33	1.28		2.08				3.41	0.390029	0.05	0.0146628	25
Bosnia Herzegovina	BIH	2021-07-01	0.02	0.06	0.71	0.63		2.5				3.21	0.221184	0.08	0.0249221	166.667
Bosnia Herzegovina	BIH	2021-10-01	0	0.1	1.41	1.31		2.5				3.91	0.360614	0.1	0.0255754	233.333
Bosnia Herzegovina	BIH	2022-01-01	0.01	0.13	1.49	1.35		2.61				4.1	0.363415	0.14	0.0341463	100
Bosnia Herzegovina	BIH	2022-04-01	0.03	0.08	1.11	1		2.34				3.45	0.321739	0.11	0.0318841	120
Bosnia Herzegovina	BIH	2022-07-01	0.03	0.05	0.61	0.53		2.22				2.83	0.215548	0.08	0.0282686	0
Bosnia Herzegovina	BIH	2022-10-01	0.01	0.03	1.07	1.03		2.38			0	3.45	0.310145	0.04	0.0115942	-60
Bosnia Herzegovina	BIH	2023-01-01	0.03	0.06	1.73	1.64		1.98			0	3.71	0.466307	0.09	0.0242588	-35.7143
Bosnia Herzegovina	BIH	2023-04-01	0.05	0.04	1.6	1.51		1.87			0	3.47	0.461095	0.09	0.0259366	-18.1818
Bosnia Herzegovina	BIH	2023-07-01	0.06	0.03	0.9	0.81		2.59			0	3.49	0.25788	0.09	0.025788	12.5
Bosnia Herzegovina	BIH	2023-10-01	0.03	0.03	1.41	1.35		2.12			0	3.53	0.399433	0.06	0.0169972	50
Bosnia Herzegovina	BIH	2024-01-01	0.05	0.06	1.59	1.48		2.12			0	3.71	0.428571	0.11	0.0296496	22.2222
Bosnia Herzegovina	BIH	2024-04-01	0.1	0.04	1	0.86		1.75			0	2.75	0.363636	0.14	0.0509091	55.5556
Bosnia Herzegovina	BIH	2024-07-01	0.1	0.03	0.74	0.61		1.95			0	2.69	0.275093	0.13	0.0483271	44.4444
Bosnia Herzegovina	BIH	2024-10-01	0.06	0.04	1.16	1.06		2.13			0	3.29	0.352584	0.1	0.0303951	66.6667
Bosnia Herzegovina	BIH	2025-01-01	0.06	0.05	1.34	1.23		2.06			0	3.4	0.394118	0.11	0.0323529	0
Bosnia Herzegovina	BIH	2025-04-01	0.16	0.04	1.05	0.85		1.34			0	2.39	0.439331	0.2	0.083682	42.8571
Bosnia Herzegovina	BIH	2025-07-01	0.19	0.03	0.86	0.64		1.59			0	2.45	0.35102	0.22	0.0897959	69.2308
Bosnia Herzegovina	BIH	2025-10-01	0.1	0.05	1.28	1.13		1.87			0	3.15	0.406349	0.15	0.047619	50
Bosnia Herzegovina	BIH	2026-01-01	0.06	0.05	1.88	1.77		1.62			0	3.5	0.537143	0.11	0.0314286	0
Bosnia Herzegovina	BIH	2026-04-01	0.03	0.02	0.46	0.41		0.34			0	0.8	0.575	0.05	0.0625	-75
Brazil	BRA	2018-01-01	0.64	7.48	134.53	115.55	10.86	3.33	14.56	3.08		159.27	0.844666	8.12	0.0509826
Brazil	BRA	2018-04-01	0.8	10.32	125.03	99.14	14.77	3.08	12.33	4.36		148.03	0.844626	11.12	0.0751199
Brazil	BRA	2018-07-01	0.98	15.06	118.14	85.36	16.74	4.26	15.2	4.44		147.74	0.799648	16.04	0.108569
Brazil	BRA	2018-10-01	1.05	12.96	134.39	108.36	12.02	2.06	12.53	3.78		156.32	0.859711	14.01	0.0896238
Brazil	BRA	2019-01-01	1.48	8.86	140.19	119.18	10.67	2.3	16.12	4.04		166.05	0.844264	10.34	0.0622704	27.3399
Brazil	BRA	2019-04-01	1.45	11.46	132.52	106.62	12.99	2.31	12.85	3.27		154.05	0.86024	12.91	0.083804	16.0971
Brazil	BRA	2019-07-01	1.77	17.15	122.78	87.31	16.55	4.5	17.19	4.44		151.4	0.810964	18.92	0.124967	17.9551
Brazil	BRA	2019-10-01	1.94	15.93	129.22	96.64	14.71	4.85	19.81	4.39		160.95	0.802858	17.87	0.111028	27.5517
Brazil	BRA	2020-01-01	2.29	7.62	139.39	116.78	12.7	3.41	16.62	3.39		165.73	0.841067	9.91	0.0597961	-4.15861
Brazil	BRA	2020-04-01	2.63	11.64	122.72	93.85	14.6	1.29	11.41	3.88		142.12	0.863496	14.27	0.100408	10.5345
Brazil	BRA	2020-07-01	3.03	18.74	135.38	98.97	14.64	1.43	11.97	2.68		154.36	0.877041	21.77	0.141034	15.0634
Brazil	BRA	2020-10-01	2.8	15.91	130.58	95.07	16.8	4.75	19.49	4.1		163.55	0.79841	18.71	0.114399	4.70062
Brazil	BRA	2021-01-01	2.93	12.85	137.29	110.24	11.27	3.64	17.14	3.99		166.32	0.825457	15.78	0.0948773	59.2331
Brazil	BRA	2021-04-01	3.93	15.63	131.51	96.76	15.19	3.38	18.76	2.77		160.8	0.817848	19.56	0.121642	37.0708
Brazil	BRA	2021-07-01	4.83	23.34	121.45	75.51	17.77	5.04	24.72	3.73		162.05	0.74946	28.17	0.173835	29.3983
Brazil	BRA	2021-10-01	5.07	19.25	127.77	90.29	13.16	4.42	24.94	4.22		167.14	0.764449	24.32	0.145507	29.984
Brazil	BRA	2022-01-01	6.23	14.5	151.13	120.48	9.92	1.81	14.43	4.23		174.56	0.865777	20.73	0.118756	31.3688
Brazil	BRA	2022-04-01	6.57	16.56	148.61	111.09	14.39	1.43	8.5	3.62		164.39	0.904009	23.13	0.140702	18.2515
Brazil	BRA	2022-07-01	8.35	26.38	149.88	98.3	16.85	2.18	9.28	2.92		166.46	0.900396	34.73	0.208639	23.2872
Brazil	BRA	2022-10-01	8.99	22.13	153.07	108.09	13.86	1.49	9.92	3.78		170.34	0.898615	31.12	0.182693	27.9605
Brazil	BRA	2023-01-01	9.83	19.07	163.89	124.61	10.38	1.41	8.65	3.93		179.82	0.911411	28.9	0.160716	39.4115
Brazil	BRA	2023-04-01	10.63	20.31	152.88	107.14	14.8	1.8	9.51	4.33		170.44	0.896973	30.94	0.18153	33.7657
Brazil	BRA	2023-07-01	13.86	28.26	157.22	98.05	17.05	2.17	9.02	4.19		174.36	0.901698	42.12	0.241569	21.2784
Brazil	BRA	2023-10-01	17.41	26.04	171.3	112.33	15.52	2.26	11.41	2.05		188.99	0.906397	43.45	0.229906	39.6208
Brazil	BRA	2024-01-01	17.27	16.96	173.47	128.29	10.95	1.98	9.98	4.23		191.59	0.905423	34.23	0.178663	18.4429
Brazil	BRA	2024-04-01	16.26	24.23	166.68	110.69	15.5	1.17	8.29	4.14		182.05	0.915573	40.49	0.222411	30.8662
Brazil	BRA	2024-07-01	18.71	34.63	160.75	90.46	16.95	2.54	14.81	4.41		184.5	0.871274	53.34	0.289106	26.6382
Brazil	BRA	2024-10-01	22.69	30.16	166.58	98.88	14.85	3.43	15.67	2.95		190.65	0.873748	52.85	0.27721	21.6341
Brazil	BRA	2025-01-01	23.63	21.45	183.25	127.47	10.7	1.43	9.55	4.13		200.1	0.915792	45.08	0.225287	31.6973
Brazil	BRA	2025-04-01	20.13	28.7	164.52	101	14.69	2.11	10.4	3.02		181.7	0.905449	48.83	0.26874	20.5977
Brazil	BRA	2025-07-01	21.83	35.32	155.43	82.12	16.16	3.15	16.66	4.25		181.19	0.857829	57.15	0.315415	7.14286
Brazil	BRA	2025-10-01	26.66	29.6	162.99	93.15	13.58	3.41	18.23	4.42		190.61	0.855097	56.26	0.295158	6.45222
Brazil	BRA	2026-01-01	25.81	20.25	173.48	116.6	10.82	2.89	14.71	2.02		194.42	0.892295	46.06	0.23691	2.17391
Brazil	BRA	2026-04-01	7.71	7.46	56.16	37.48	3.51	0.55	3.94	1.4		62.41	0.899856	15.17	0.24307	-68.933
Bulgaria	BGR	2015-01-01	0.24	0.48	2.41	1.65	0.04	6.52		4.44		13.37	0.180254	0.72	0.0538519
Bulgaria	BGR	2015-04-01	0.44	0.34	2.48	1.65	0.05	4.97		3.44		10.89	0.227732	0.78	0.0716253
Bulgaria	BGR	2015-07-01	0.45	0.25	1.79	1.03	0.06	6.27		3.65		11.71	0.152861	0.7	0.059778
Bulgaria	BGR	2015-10-01	0.23	0.33	1.3	0.68	0.06	6.76		3.85		11.91	0.109152	0.56	0.0470193
Bulgaria	BGR	2016-01-01	0.24	0.41	1.64	0.93	0.06	5.7		4.4		11.74	0.139693	0.65	0.0553663	-9.72222
Bulgaria	BGR	2016-04-01	0.42	0.25	1.95	1.22	0.06	3.95		3.48		9.38	0.207889	0.67	0.0714286	-14.1026
Bulgaria	BGR	2016-07-01	0.45	0.25	1.48	0.72	0.06	4.9		4.37		10.75	0.137674	0.7	0.0651163	0
Bulgaria	BGR	2016-10-01	0.22	0.44	1.38	0.66	0.06	7.16	0.25	3.51		12.3	0.112195	0.66	0.0536585	17.8571
Bulgaria	BGR	2017-01-01	0.24	0.43	1.35	0.6	0.08	5.86	0.75	4.43		12.39	0.108959	0.67	0.0540759	3.07692
Bulgaria	BGR	2017-04-01	0.43	0.27	1.73	0.94	0.09	4.55	0.38	3.21		9.87	0.175279	0.7	0.070922	4.47761
Bulgaria	BGR	2017-07-01	0.44	0.35	1.48	0.62	0.07	5.07	0.3	4		10.85	0.136406	0.79	0.0728111	12.8571
Bulgaria	BGR	2017-10-01	0.2	0.39	1.29	0.64	0.06	5.74	0.55	3.92		11.5	0.112174	0.59	0.0513043	-10.6061
Bulgaria	BGR	2018-01-01	0.19	0.37	1.77	1.14	0.07	5.08	0.66	4.55		12.06	0.146766	0.56	0.0464345	-16.4179
Bulgaria	BGR	2018-04-01	0.42	0.29	2.3	1.53	0.06	3.67	0.38	3.44		9.79	0.234934	0.71	0.072523	1.42857
Bulgaria	BGR	2018-07-01	0.41	0.25	2.12	1.4	0.06	4.87	0.33	4.09		11.41	0.185802	0.66	0.057844	-16.4557
Bulgaria	BGR	2018-10-01	0.21	0.36	1.6	0.98	0.05	6.58	0.61	4.04		12.83	0.124708	0.57	0.0444271	-3.38983
Bulgaria	BGR	2019-01-01	0.25	0.43	1.47	0.73	0.06	5.71	0.77	4.55		12.5	0.1176	0.68	0.0544	21.4286
Bulgaria	BGR	2019-04-01	0.41	0.25	1.77	1.05	0.06	3.69	0.48	3.58		9.52	0.185924	0.66	0.0693277	-7.04225
Bulgaria	BGR	2019-07-01	0.44	0.22	1.33	0.61	0.06	4.32	0.35	4.32		10.32	0.128876	0.66	0.0639535	0
Bulgaria	BGR	2019-10-01	0.22	0.35	1.11	0.49	0.05	5.2	0.6	4.1		11.01	0.100817	0.57	0.0517711	-2.22045e-14
Bulgaria	BGR	2020-01-01	0.28	0.52	1.36	0.5	0.06	4.56	0.8	4.7		11.42	0.119089	0.8	0.0700525	17.6471
Bulgaria	BGR	2020-04-01	0.45	0.31	2.03	1.21	0.06	2.96	0.36	3.47		8.82	0.230159	0.76	0.0861678	15.1515
Bulgaria	BGR	2020-07-01	0.49	0.23	1.45	0.67	0.06	3.39	0.36	4.39		9.59	0.151199	0.72	0.0750782	9.09091
Bulgaria	BGR	2020-10-01	0.21	0.35	1.18	0.56	0.06	4.17	0.67	4.06		10.08	0.117063	0.56	0.0555556	-1.75439
Bulgaria	BGR	2021-01-01	0.26	0.45	2.26	1.49	0.06	4.11	0.84	4.54		11.75	0.19234	0.71	0.0604255	-11.25
Bulgaria	BGR	2021-04-01	0.45	0.27	2.46	1.68	0.06	3.71	0.51	3.46		10.14	0.242604	0.72	0.0710059	-5.26316
Bulgaria	BGR	2021-07-01	0.5	0.23	1.54	0.75	0.06	4.79	0.56	4.53		11.42	0.134851	0.73	0.0639229	1.38889
Bulgaria	BGR	2021-10-01	0.22	0.43	1.66	0.96	0.05	6.84	0.87	3.96		13.33	0.124531	0.65	0.0487622	16.0714
Bulgaria	BGR	2022-01-01	0.32	0.55	2.01	1.08	0.06	7.05	1.01	4.68		14.75	0.136271	0.87	0.0589831	22.5352
Bulgaria	BGR	2022-04-01	0.54	0.28	2.07	1.19	0.06	5.35	0.51	3.72		11.65	0.177682	0.82	0.0703863	13.8889
Bulgaria	BGR	2022-07-01	0.53	0.25	1.63	0.79	0.06	5.33	0.44	4.41		11.81	0.138019	0.78	0.0660457	6.84932
Bulgaria	BGR	2022-10-01	0.27	0.31	1.34	0.7	0.06	6.02	0.68	3.65		11.69	0.114628	0.58	0.0496151	-10.7692
Bulgaria	BGR	2023-01-01	0.38	0.44	1.56	0.68	0.06	5.11	0.75	4.68		12.1	0.128926	0.82	0.0677686	-5.74713
Bulgaria	BGR	2023-04-01	0.82	0.28	2.32	1.18	0.04	2.21	0.45	3.38		8.36	0.277512	1.1	0.131579	34.1463
Bulgaria	BGR	2023-07-01	1.23	0.34	2.29	0.68	0.04	2.53	0.35	4.42		9.59	0.23879	1.57	0.163712	101.282
Bulgaria	BGR	2023-10-01	0.66	0.44	1.67	0.53	0.04	3.67	0.6	3.68		9.62	0.173597	1.1	0.114345	89.6552
Bulgaria	BGR	2024-01-01	0.77	0.44	1.93	0.69	0.03	2.81	0.74	4.64		10.12	0.190711	1.21	0.119565	47.561
Bulgaria	BGR	2024-04-01	1.51	0.28	3.09	1.27	0.03	1.46	0.39	3.15		8.09	0.381953	1.79	0.221261	62.7273
Bulgaria	BGR	2024-07-01	1.68	0.27	2.63	0.64	0.04	2.44	0.4	4.21		9.68	0.271694	1.95	0.201446	24.2038
Bulgaria	BGR	2024-10-01	0.95	0.39	1.66	0.29	0.03	3.09	0.54	3.52		8.81	0.188422	1.34	0.1521	21.8182
Bulgaria	BGR	2025-01-01	1.11	0.39	2.07	0.54	0.03	3.8	0.63	4.27		10.77	0.192201	1.5	0.139276	23.9669
Bulgaria	BGR	2025-04-01	1.92	0.24	3.02	0.83	0.03	1.51	0.41	3.29		8.23	0.36695	2.16	0.262454	20.6704
Bulgaria	BGR	2025-07-01	2.25	0.23	3.05	0.54	0.03	1.53	0.29	3.77		8.64	0.353009	2.48	0.287037	27.1795
Bulgaria	BGR	2025-10-01	1.03	0.38	2.16	0.72	0.03	2.75	0.55	3.26		8.72	0.247706	1.41	0.161697	5.22388
Bulgaria	BGR	2026-01-01	1.12	0.42	2.97	1.4	0.03	2.83	0.7	3.97		10.47	0.283668	1.54	0.147087	2.66667
Bulgaria	BGR	2026-04-01	0.59	0.08	1.12	0.44	0.01	0.53	0.19	1.38		3.22	0.347826	0.67	0.208075	-68.9815
Canada	CAN	2010-01-01	0	0.74	106.7	103.56	2.4	18.35	11.88	22.11	0	161.66	0.660027	0.74	0.00457751
Canada	CAN	2010-04-01	0	0.84	83.02	80.13	2.05	15.71	10.17	18.17	0	129.4	0.641577	0.84	0.0064915
Canada	CAN	2010-07-01	0	0.8	76.41	73.38	2.23	17.04	11.02	21.9	0	128.85	0.593015	0.8	0.00620877
Canada	CAN	2010-10-01	0	1.29	93.81	90.34	2.18	16.69	10.81	23.03	0	146.79	0.639076	1.29	0.00878806
Canada	CAN	2011-01-01	0	1.89	110.61	106.57	2.15	15.83	12.24	23.76	0	164.45	0.672606	1.89	0.0114929	155.405
Canada	CAN	2011-04-01	0	1.74	90.3	86.9	1.66	12.24	9.46	21.56	0	135.24	0.667702	1.74	0.012866	107.143
Canada	CAN	2011-07-01	0.03	1.34	87.96	84.68	1.91	14.05	10.86	23.64	0	138.36	0.635733	1.37	0.00990171	71.25
Canada	CAN	2011-10-01	0.04	2.59	99.19	94.62	1.94	14.25	11.01	21.09	0	147.41	0.672885	2.63	0.0178414	103.876
Canada	CAN	2012-01-01	0.04	2.71	109.52	104.5	2.27	14.47	13.78	21.62	0	161.63	0.677597	2.75	0.0170142	45.5026
Canada	CAN	2012-04-01	0.09	2.01	90.91	87.02	1.79	11.42	10.87	21.88	0	136.98	0.663674	2.1	0.0153307	20.6897
Canada	CAN	2012-07-01	0.09	1.45	91.06	87.52	1.99	12.7	12.09	22.74	0.01	140.64	0.647469	1.54	0.0109499	12.4088
Canada	CAN	2012-10-01	0.04	2.59	102.13	97.33	2.14	13.63	12.98	24.75	0.03	155.64	0.656194	2.63	0.016898	0
Canada	CAN	2013-01-01	0.04	2.72	114.83	109.85	2.19	14.45	13	23.02	0.03	167.56	0.685307	2.76	0.0164717	0.363636
Canada	CAN	2013-04-01	0.08	2.12	93.09	89.06	1.8	11.85	10.66	22.54	0.03	140.09	0.664501	2.2	0.0157042	4.7619
Canada	CAN	2013-07-01	0.09	1.47	90.16	86.68	1.9	12.56	11.3	25.9	0.02	141.95	0.635153	1.56	0.0109898	1.2987
Canada	CAN	2013-10-01	0.04	2.71	106.59	101.69	2.14	14.1	12.68	25.5	0.01	161.09	0.66168	2.75	0.0170712	4.56274
Canada	CAN	2014-01-01	0.04	2.77	115.83	110.29	2.73	14.39	12.58	24.65	0	169.64	0.682799	2.81	0.0165645	1.81159
Canada	CAN	2014-04-01	0.08	1.93	90.23	85.98	2.24	11.78	10.31	22.84	0	137.04	0.658421	2.01	0.0146673	-8.63636
Canada	CAN	2014-07-01	0.09	1.59	87.36	83.38	2.3	12.12	10.61	26.86	0	138.86	0.629123	1.68	0.0120985	7.69231
Canada	CAN	2014-10-01	0.04	2.69	100.74	95.47	2.54	13.33	11.67	26.56	0	154.35	0.652672	2.73	0.0176871	-0.727273
Canada	CAN	2015-01-01	0.03	2.74	116.55	111.86	1.92	13.02	13.57	26.72	0	171.56	0.679354	2.77	0.016146	-1.42349
Canada	CAN	2015-04-01	0.09	1.91	90.02	86.48	1.54	10.49	10.92	23.81	0	136.62	0.658908	2	0.0146391	-0.497512
Canada	CAN	2015-07-01	0.09	1.54	87.28	83.95	1.7	11.58	12.06	24.55	0	136.99	0.637127	1.63	0.0118987	-2.97619
Canada	CAN	2015-10-01	0.05	2.67	97.85	93.34	1.79	12.16	12.67	23.3	0	147.58	0.66303	2.72	0.0184307	-0.3663
Canada	CAN	2016-01-01	0.25	8.87	120.79	108.49	3.12	15.58	15.48	25.39	0.06	179.27	0.673788	9.12	0.050873	229.242
Canada	CAN	2016-04-01	0.62	6.96	98.08	87.81	2.63	13.1	13.01	20.52	0.06	146.42	0.669854	7.58	0.0517689	279
Canada	CAN	2016-07-01	0.64	5.59	95.2	85.93	3	15	14.91	25.36	0.04	152.43	0.624549	6.23	0.0408712	282.209
Canada	CAN	2016-10-01	0.28	9.07	111.59	99.17	3.03	15.13	15.03	24.41	0.04	168.12	0.663752	9.35	0.055615	243.75
Canada	CAN	2017-01-01	0.32	8.79	125.25	112.88	3.2	15.97	14.42	23.94	0.06	181.17	0.69134	9.11	0.0502843	-0.109649
Canada	CAN	2017-04-01	0.63	7.15	99.38	89.03	2.53	12.68	11.44	22.55	0.04	147.32	0.674586	7.78	0.0528102	2.63852
Canada	CAN	2017-07-01	0.77	5.2	98.5	89.55	2.94	14.66	13.23	24.7	0.04	152.56	0.645648	5.97	0.0391321	-4.17335
Canada	CAN	2017-10-01	0.31	9.77	112.54	99.28	3.12	15.58	14.06	24.55	0.06	168.28	0.668766	10.08	0.0599002	7.80749
Canada	CAN	2018-01-01	0.32	9.47	121.71	108.86	3	13.06	17.27	23.81	0.06	177.44	0.685922	9.79	0.0551736	7.46432
Canada	CAN	2018-04-01	0.76	7.23	98.06	87.62	2.39	10.34	13.7	21.72	0.06	145.1	0.67581	7.99	0.0550655	2.69923
Canada	CAN	2018-07-01	0.84	5.71	95.42	85.83	2.98	12.9	17.07	24.87	0.06	151.83	0.628466	6.55	0.0431404	9.71524
Canada	CAN	2018-10-01	0.28	9.44	111.97	99.31	2.88	12.47	16.5	24.62	0.06	167.08	0.670158	9.72	0.0581757	-3.57143
Canada	CAN	2019-01-01	0.4	10.38	125.1	111.01	3.25	13.62	19.4	22.35	0.06	182	0.687363	10.78	0.0592308	10.1124
Canada	CAN	2019-04-01	0.84	7.05	94.94	84.6	2.4	10.07	14.34	22.5	0.05	142.99	0.663963	7.89	0.0551787	-1.25156
Canada	CAN	2019-07-01	0.89	5.82	92.67	83.14	2.79	11.71	16.69	26.07	0.03	148.46	0.624209	6.71	0.0451974	2.44275
Canada	CAN	2019-10-01	0.32	9.56	111.72	98.91	2.88	12.1	17.25	24.55	0.05	166.98	0.669062	9.88	0.0591688	1.64609
Canada	CAN	2020-01-01	0.41	9.79	123.34	110.26	2.85	10.29	19.43	24.28	0.03	178.66	0.690362	10.2	0.0570917	-5.38033
Canada	CAN	2020-04-01	0.86	8.15	96.93	85.77	2.12	7.62	14.4	22.97	0.03	142.92	0.678212	9.01	0.0630423	14.1952
Canada	CAN	2020-07-01	0.91	7.12	97.77	87.15	2.56	9.23	17.43	23.96	0.03	149.59	0.653586	8.03	0.0536801	19.6721
Canada	CAN	2020-10-01	0.38	11.2	113.73	99.43	2.69	9.69	18.29	21.44	0.03	164.4	0.691788	11.58	0.070438	17.2065
Canada	CAN	2021-01-01	0.5	10.52	125.79	111.93	2.79	8.56	19.69	20.34	0.05	175.56	0.716507	11.02	0.0627706	8.03922
Canada	CAN	2021-04-01	0.92	8.21	98.47	86.95	2.35	7.19	16.55	22.38	0.04	145.6	0.676305	9.13	0.062706	1.33185
Canada	CAN	2021-07-01	0.88	6.81	93.56	83.13	2.71	8.31	19.14	23.92	0.03	146.08	0.640471	7.69	0.0526424	-4.23412
Canada	CAN	2021-10-01	0.44	10.63	109.02	94.99	2.91	8.92	20.53	20.74	0.05	160.44	0.679506	11.07	0.0689978	-4.40415
Canada	CAN	2022-01-01	0.47	11.5	124.95	110.44	2.5	6.84	22.48	22.16	0.04	177.93	0.702242	11.97	0.0672736	8.62069
Canada	CAN	2022-04-01	1	8.99	102.28	90.32	1.95	5.3	17.45	19.42	0.02	145.62	0.702376	9.99	0.0686032	9.4195
Canada	CAN	2022-07-01	1.09	6.96	101.75	91.33	2.34	6.4	21.04	22.58	0.03	153.18	0.664251	8.05	0.0525526	4.6814
Canada	CAN	2022-10-01	0.63	11.64	115.03	100.26	2.45	6.7	22.05	18.14	0.05	163.39	0.704021	12.27	0.0750964	10.8401
Canada	CAN	2023-01-01	0.81	11.08	124.88	110.72	2.24	5.48	23.29	21.13	0.03	175.93	0.709828	11.89	0.0675837	-0.668338
Canada	CAN	2023-04-01	1.66	9.08	97.52	84.83	1.92	4.73	20.04	19.79	0.03	143.09	0.681529	10.74	0.0750577	7.50751
Canada	CAN	2023-07-01	1.58	6.63	87.52	76.97	2.31	5.7	24.23	22.17	0.03	140.82	0.621503	8.21	0.0583014	1.98758
Canada	CAN	2023-10-01	0.61	12.87	102.66	86.78	2.34	5.75	24.39	21.48	0.06	155.48	0.660278	13.48	0.0866993	9.86145
Canada	CAN	2024-01-01	0.94	12.81	113.43	96.99	2.62	3.76	28.7	21.09	0.07	168.35	0.673775	13.75	0.0816751	15.6434
Canada	CAN	2024-04-01	1.73	11.16	92.23	77.25	2.02	2.9	22.14	17.29	0.07	135.64	0.679962	12.89	0.095031	20.0186
Canada	CAN	2024-07-01	1.81	8.07	91.57	79.08	2.54	3.64	27.78	22.05	0.07	146.38	0.625564	9.88	0.0674956	20.341
Canada	CAN	2024-10-01	0.75	13.8	105.63	88.51	2.49	3.58	27.3	21.3	0.08	159.13	0.663797	14.55	0.0914347	7.93769
Canada	CAN	2025-01-01	0.97	15.06	125.8	106.89	2.77	3.98	30.41	20.95	0.11	182.6	0.688938	16.03	0.0877875	16.5818
Canada	CAN	2025-04-01	2.11	12.06	93.61	77.36	1.99	2.86	21.84	21.96	0.09	141.34	0.662304	14.17	0.100255	9.93018
Canada	CAN	2025-07-01	2.08	8.21	87.06	74	2.68	3.85	29.41	20.28	0.09	142.01	0.613055	10.29	0.0724597	4.1498
Canada	CAN	2025-10-01	0.82	15.16	104.05	85.12	2.85	4.1	31.27	18.39	0.1	159.29	0.653211	15.98	0.10032	9.82818
Canada	CAN	2026-01-01	0.55	9.98	82.93	70.25	2.05	2.94	22.42	13.53	0.1	122.88	0.674886	10.53	0.0856934	-34.3107
Chile	CHL	2016-01-01	0.53	0.44	6.96	5.35	0.64	7.86	3.1			18.58	0.374596	0.97	0.0522067
Chile	CHL	2016-04-01	0.43	0.48	6.01	4.4	0.7	8.09	3.22			18.29	0.328595	0.91	0.049754
Chile	CHL	2016-07-01	0.67	0.6	6.37	4.39	0.71	8.37	2.98			18.25	0.349041	1.27	0.069589
Chile	CHL	2016-10-01	0.93	0.77	7.6	5.3	0.6	7.63	2.7			18.26	0.41621	1.7	0.0930997
Chile	CHL	2017-01-01	0.96	0.75	7.17	4.82	0.64	7.11	3.67		0	18.2	0.393956	1.71	0.093956	76.2887
Chile	CHL	2017-04-01	0.71	0.88	6.15	3.82	0.72	7.85	3.9		0.02	18.33	0.335516	1.59	0.086743	74.7253
Chile	CHL	2017-07-01	0.94	0.96	7.55	5.01	0.62	7.72	3.28		0.02	18.84	0.400743	1.9	0.100849	49.6063
Chile	CHL	2017-10-01	1.32	1	10.98	8.13	0.5	6.29	1.2		0.03	18.9	0.580952	2.32	0.122751	36.4706
Chile	CHL	2018-01-01	1.41	0.85	8.52	5.57	0.64	7.33	3.1		0.05	19.16	0.444676	2.26	0.117954	32.1637
Chile	CHL	2018-04-01	1.05	0.88	7.2	4.52	0.69	7.96	3.83		0.06	19.18	0.375391	1.93	0.100626	21.3836
Chile	CHL	2018-07-01	1.22	1.11	8.11	5.11	0.62	8	2.95		0.05	19.32	0.419772	2.33	0.1206	22.6316
Chile	CHL	2018-10-01	1.8	1.22	11.59	8.07	0.44	5.57	1.83		0.06	19.2	0.603646	3.02	0.157292	30.1724
Chile	CHL	2019-01-01	1.67	0.89	8.35	5.28	0.45	6.66	3.94		0.06	19.22	0.434443	2.56	0.133195	13.2743
Chile	CHL	2019-04-01	1.17	1.05	7.2	4.37	0.55	7.64	4.19		0.06	19.29	0.37325	2.22	0.115086	15.0259
Chile	CHL	2019-07-01	1.46	1.35	8.62	5.32	0.44	7.27	3.46		0.05	19.52	0.441598	2.81	0.143955	20.6009
Chile	CHL	2019-10-01	2.08	1.51	9.87	5.85	0.38	6.81	2.55		0.05	19.35	0.510078	3.59	0.18553	18.8742
Chile	CHL	2020-01-01	1.94	1.14	8.49	4.84	0.51	7.05	4.14		0.06	19.94	0.425777	3.08	0.154463	20.3125
Chile	CHL	2020-04-01	1.39	1.16	6.33	3.2	0.51	7.65	4.63		0.07	19.04	0.332458	2.55	0.133929	14.8649
Chile	CHL	2020-07-01	1.7	1.51	9.02	5.34	0.42	6.3	3.61		0.05	19.1	0.472251	3.21	0.168063	14.2349
Chile	CHL	2020-10-01	2.61	1.74	12.13	7.26	0.45	6	1.34		0.07	19.69	0.616049	4.35	0.220924	21.1699
Chile	CHL	2021-01-01	2.58	1.45	8.94	4.35	0.49	7.13	3.06		0.07	19.93	0.44857	4.03	0.202208	30.8442
Chile	CHL	2021-04-01	1.95	1.49	7.81	3.73	0.55	7.76	4.25		0.09	20.2	0.386634	3.44	0.170297	34.902
Chile	CHL	2021-07-01	2.45	2.01	8.66	3.62	0.49	7.15	3.97		0.09	20.74	0.417551	4.46	0.215043	38.9408
Chile	CHL	2021-10-01	3.81	2.3	11.49	4.8	0.49	5.63	3.19		0.09	20.7	0.555072	6.11	0.295169	40.4598
Chile	CHL	2022-01-01	3.86	2.24	10.62	3.88	0.51	5.57	3.91		0.13	20.56	0.516537	6.1	0.296693	51.3648
Chile	CHL	2022-04-01	2.94	2.06	9.21	3.58	0.52	6.05	4.71		0.11	20.86	0.441515	5	0.239693	45.3488
Chile	CHL	2022-07-01	3.18	2.37	12	5.85	0.48	4.63	3.85		0.12	20.86	0.575264	5.55	0.266059	24.4395
Chile	CHL	2022-10-01	4.54	2.17	14.22	6.99	0.41	2.91	3.4		0.11	20.88	0.681034	6.71	0.32136	9.81997
Chile	CHL	2023-01-01	4.83	2.29	11.93	4.24	0.48	3.5	4.99		0.09	20.86	0.571908	7.12	0.341323	16.7213
Chile	CHL	2023-04-01	3.65	2.47	10.4	3.64	0.54	4.28	5.69		0.1	20.75	0.501205	6.12	0.29494	22.4
Chile	CHL	2023-07-01	3.51	2.43	14.58	8.03	0.49	3.29	3.04		0.12	21.16	0.689036	5.94	0.280718	7.02703
Chile	CHL	2023-10-01	4.74	2.7	16.06	8.05	0.45	2.9	1.68		0.12	20.91	0.768054	7.44	0.355811	10.8793
Chile	CHL	2024-01-01	5.3	2.48	14.55	6.1	0.57	3.46	3.38		0.1	21.66	0.671745	7.78	0.359187	9.26966
Chile	CHL	2024-04-01	3.79	2.62	12.67	5.67	0.5	4.07	4.46		0.09	21.5	0.589302	6.41	0.29814	4.73856
Chile	CHL	2024-07-01	4.33	3.11	15.08	7.11	0.46	2.89	3		0.07	21.3	0.707981	7.44	0.349296	25.2525
Chile	CHL	2024-10-01	5.44	2.84	16.95	8.22	0.41	2.49	1.5		0.04	21.2	0.799528	8.28	0.390566	11.2903
Chile	CHL	2025-01-01	5.75	2.91	14.45	5.27	0.49	3.12	3.5		0.03	21.33	0.67745	8.66	0.406001	11.3111
Chile	CHL	2025-04-01	3.98	2.83	12.69	5.28	0.57	4.06	4.11		0.03	21.32	0.595216	6.81	0.319418	6.24025
Chile	CHL	2025-07-01	4.6	3.2	13.25	4.9	0.52	4.37	3.44		0.03	21.35	0.620609	7.8	0.36534	4.83871
Chile	CHL	2025-10-01	6.52	3.26	15.53	5.33	0.39	3.52	2.16		0.03	21.54	0.720984	9.78	0.454039	18.1159
Chile	CHL	2026-01-01	6.55	2.9	14.46	4.53	0.45	3.31	3.64		0.03	21.72	0.665746	9.45	0.435083	9.1224
Chile	CHL	2026-04-01	1.81	1.09	4.3	1.21	0.18	1.28	1.23		0.01	6.94	0.619597	2.9	0.417867	-57.4156
China	CHN	2015-01-01		44.25	230.83	173.58	13	1014.13	36.63	35.39		1322.11	0.174592	44.25	0.0334692
China	CHN	2015-04-01		52.54	316.16	250.9	12.72	992.15	35.84	41.94		1391.11	0.227272	52.54	0.0377684
China	CHN	2015-07-01		37.06	372.23	322.04	13.13	1024	36.99	49.55		1487.96	0.250161	37.06	0.0249066
China	CHN	2015-10-01		51.74	310.28	245.46	13.08	1019.13	36.82	45.08		1416.47	0.219052	51.74	0.0365274
China	CHN	2016-01-01	12.39	53.66	283.52	202.4	15.07	988.26	39.72	47.07		1363.65	0.207913	66.05	0.0484362	49.2655
China	CHN	2016-04-01	17.3	66.61	377.69	279.17	14.61	957.74	38.5	49.4		1428.25	0.264442	83.91	0.0587502	59.7069
China	CHN	2016-07-01	20.14	48.82	416.04	330.21	16.87	1105.77	44.44	57.97		1629.9	0.255255	68.96	0.0423093	86.0766
China	CHN	2016-10-01	16.7	71.76	342.35	237.13	16.76	1098.86	44.17	58.31		1549.33	0.220966	88.46	0.0570956	70.9702
China	CHN	2017-01-01	21.91	70.58	301.62	190.59	18.54	1065.98	42.73	54.76		1470.51	0.205113	92.49	0.0628965	40.0303
China	CHN	2017-04-01	29.77	81.13	389.73	261.17	17.66	1015.41	40.7	60.65		1511.66	0.257816	110.9	0.0733631	32.1654
China	CHN	2017-07-01	34.1	62.63	462.63	345.7	20.2	1161.46	46.56	68.05		1744.61	0.265177	96.73	0.0554451	40.2697
China	CHN	2017-10-01	32.01	90.26	406.46	264.6	19.59	1126.6	45.16	64.65		1648.61	0.246547	122.27	0.0741655	38.2207
China	CHN	2018-01-01	35.65	92	342.91	193.11	22.15	1161.92	50.63	61.08		1622.29	0.211374	127.65	0.0786851	38.0149
China	CHN	2018-04-01	47.39	99.7	437.4	268.94	21.37	1121.22	48.85	68.89		1681.91	0.260061	147.09	0.0874541	32.633
China	CHN	2018-07-01	50.45	75.89	520.97	370.91	23.72	1244.37	54.22	78.76		1904.47	0.273551	126.34	0.0663387	30.611
China	CHN	2018-10-01	43.41	98.4	436.12	271.5	22.81	1196.87	52.15	84.74		1775.8	0.245591	141.81	0.079857	15.981
China	CHN	2019-01-01	44	104.1	394.21	218.91	27.2	1193.58	52.08	77.03		1721.94	0.228934	148.1	0.0860076	16.0204
China	CHN	2019-04-01	62.7	110.4	498.28	299.81	25.37	1113.22	48.58	82.96		1747.74	0.2851	173.1	0.0990422	17.6831
China	CHN	2019-07-01	64.8	76.9	550.85	380.12	29.03	1274.01	55.6	93.84		1979.68	0.278252	141.7	0.0715772	12.1577
China	CHN	2019-10-01	52.8	114.3	454.72	258.6	29.02	1273.35	55.57	94.53		1883.55	0.241416	167.1	0.0887155	17.8337
China	CHN	2020-01-01	52.79	114.9	392.06	194.76	29.61	1100.54	52.48	77.93		1627.47	0.240902	167.69	0.103037	13.2275
China	CHN	2020-04-01	70.19	123.5	506.6	281.33	31.58	1173.25	55.94	93.63		1834.17	0.276201	193.69	0.105601	11.8949
China	CHN	2020-07-01	77.5	93.3	639.61	433.69	35.12	1305.19	62.23	98.43		2110.76	0.303024	170.8	0.0809187	20.5363
China	CHN	2020-10-01	60	134.8	535.12	304.07	36.25	1347.05	64.22	96.25		2048.1	0.261276	194.8	0.0951125	16.5769
China	CHN	2021-01-01	68.8	173.71	479.35	196.59	40.25	1332.22	65.9	92.63		1974.55	0.242764	242.51	0.122818	44.618
China	CHN	2021-04-01	88.84	170.48	587.24	289.06	38.86	1285.96	63.61	102.51		2043.61	0.287354	259.32	0.126893	33.884
China	CHN	2021-07-01	90.96	125.22	680.24	422.05	42.01	1390.33	68.77	108.02		2251.99	0.302062	216.18	0.0959951	26.5691
China	CHN	2021-10-01	77.3	183.2	584.58	283.68	40.4	1337.18	66.14	104.43		2096.79	0.278798	260.5	0.124238	33.7269
China	CHN	2022-01-01	84.1	183.3	534.38	222.37	44.61	1356.32	65.46	98.96		2059.01	0.259532	267.4	0.129868	10.2635
China	CHN	2022-04-01	114.9	209.3	725.73	363.07	38.46	1169.27	56.45	100.01		2054.82	0.353184	324.2	0.157775	25.0193
China	CHN	2022-07-01	129.61	151.5	701.8	370.68	50.01	1520.13	73.38	105.66		2405.33	0.291769	281.11	0.11687	30.0352
China	CHN	2022-10-01	98.7	218.6	617.05	254.72	45.03	1368.98	66.09	113.1		2169.14	0.284468	317.3	0.146279	21.8042
China	CHN	2023-01-01	113.5	228.7	595.53	206.92	46.41	1385.28	66.75	103.35		2154.64	0.276394	342.2	0.15882	27.9731
China	CHN	2023-04-01	152.8	234.1	683.21	251.45	44.86	1339.16	64.52	108.57		2199.07	0.310681	386.9	0.175938	19.3399
China	CHN	2023-07-01	170.6	167.7	801.08	410.31	52.47	1565.94	75.44	110.9		2557.57	0.313219	338.3	0.132274	20.3443
China	CHN	2023-10-01	147.25	255.37	737.38	285.56	49.2	1468.5	70.75	110.44		2391.02	0.308396	402.62	0.168388	26.8894
China	CHN	2024-01-01	161.8	263.6	687.79	211.17	51.22	1475.28	75.43	104.03		2346.71	0.293087	425.4	0.181275	24.3133
China	CHN	2024-04-01	229.6	245.2	864.22	344.64	44.78	1289.88	65.96	108.27		2331.99	0.370593	474.8	0.203603	22.719
China	CHN	2024-07-01	244.5	203.4	956.15	452.73	55.52	1599.3	81.78	115.56		2757.33	0.346767	447.9	0.16244	32.3973
China	CHN	2024-10-01	198.2	279.4	799.64	271.08	50.96	1467.76	75.05	118.4		2465.02	0.324395	477.6	0.193751	18.623
China	CHN	2025-01-01	232.79	303.59	809.1	223.88	48.84	1406.7	71.93	117.42		2409.14	0.335846	536.38	0.222644	26.0884
China	CHN	2025-04-01	326.29	284.41	973.29	317.67	44.92	1293.75	66.16	119.24		2456.11	0.396273	610.7	0.248645	28.6226
China	CHN	2025-07-01	357.2	225.7	1098.73	459.93	55.9	1610.04	82.33	122.41		2918.07	0.376526	582.9	0.199755	30.1407
China	CHN	2025-10-01	253.7	316.3	940.53	319.59	50.94	1467.15	75.02	123.69		2610.55	0.36028	570	0.218345	19.3467
China	CHN	2026-01-01	275.9	304.7	874.52	243.16	50.76	1462.28	74.76	113.5		2529.21	0.345768	580.6	0.229558	8.24416
China	CHN	2026-04-01	128.32	105.54	337.15	88.45	14.84	427.46	21.86	37.68		825.36	0.408488	233.86	0.283343	-61.7062
Colombia	COL	2016-01-01		0.02	8.34	8.15	0.17	2.09	4.39			16.3	0.511656	0.02	0.00122699
Colombia	COL	2016-04-01		0.01	11.86	11.72	0.13	1.28	2.7			16.16	0.733911	0.01	0.000618812
Colombia	COL	2016-07-01		0.02	13.64	13.47	0.15	1.05	2.04			16.76	0.813842	0.02	0.00119332
Colombia	COL	2016-10-01		0	13.6	13.46	0.14	0.99	1.92			16.56	0.821256	0	0
Colombia	COL	2017-01-01			13.66	13.48	0.18	0.83	1.62			16.13	0.846869	0	0	-100
Colombia	COL	2017-04-01		0	14.75	14.63	0.12	0.26	1.52			16.54	0.891778	0	0	-100
Colombia	COL	2017-07-01	0	0	15.07	14.89	0.18	0.53	1.44			17.06	0.883353	0	0	-100
Colombia	COL	2017-10-01	0	0	14.51	14.34	0.17	0.78	1.65			16.96	0.855542	0	0
Colombia	COL	2018-01-01	0	0	12.85	12.67	0.18	1.6	2.01			16.48	0.779733	0	0
Colombia	COL	2018-04-01	0	0	14.68	14.52	0.16	0.51	1.82			17.04	0.861502	0	0
Colombia	COL	2018-07-01	0	0.02	15.15	14.93	0.2	0.57	1.98			17.74	0.854002	0.02	0.0011274
Colombia	COL	2018-10-01	0	0.01	14.73	14.53	0.19	1.01	1.91			17.69	0.832674	0.01	0.000565291
Colombia	COL	2019-01-01	0.02	0.03	12.21	11.97	0.19	2.6	1.93			16.81	0.726353	0.05	0.00297442
Colombia	COL	2019-04-01	0.03	0.03	14.72	14.51	0.15	1.17	1.47			17.37	0.847438	0.06	0.00345423
Colombia	COL	2019-07-01	0.03	0.01	15.13	14.9	0.19	1.15	1.72			18	0.840556	0.04	0.00222222	100
Colombia	COL	2019-10-01	0.03	0.01	13.28	13.06	0.18	2.33	2.28			17.9	0.741899	0.04	0.00223464	300
Colombia	COL	2020-01-01	0.06	0	11.64	11.38	0.2	2.93	3.23			17.8	0.653933	0.06	0.00337079	20
Colombia	COL	2020-04-01	0.04		10.48	10.29	0.15	2.67	2.58			15.74	0.66582	0.04	0.0025413	-33.3333
Colombia	COL	2020-07-01	0.04	0	14.09	13.85	0.2	1.33	2.01			17.43	0.808376	0.04	0.00229489	0
Colombia	COL	2020-10-01	0.06	0	14.55	14.32	0.17	1.63	2.14			18.32	0.794214	0.06	0.00327511	50
Colombia	COL	2021-01-01	0.08	0.02	13.75	13.44	0.21	1.76	2.15			17.66	0.778596	0.1	0.00566251	66.6667
Colombia	COL	2021-04-01	0.06	0.03	15.28	15.04	0.15	0.74	1.81			17.83	0.856983	0.09	0.00504767	125
Colombia	COL	2021-07-01	0.09	0.01	16.56	16.24	0.22	0.56	2.09			19.21	0.862051	0.1	0.00520562	150
Colombia	COL	2021-10-01	0.1	0	16.1	15.78	0.22	0.95	2.16			19.23	0.837233	0.1	0.00520021	66.6667
Colombia	COL	2022-01-01	0.1	0.01	14.92	14.57	0.24	1.58	2.13			18.63	0.800859	0.11	0.00590446	10
Colombia	COL	2022-04-01	0.09	0	16.41	16.17	0.15	0.43	2.13			18.99	0.864139	0.09	0.00473934	0
Colombia	COL	2022-07-01	0.14	0.02	17.04	16.67	0.21	0.35	2.21			19.61	0.868944	0.16	0.0081591	60
Colombia	COL	2022-10-01	0.17	0.04	17.33	16.93	0.19	0.65	1.71			19.7	0.879695	0.21	0.0106599	110
Colombia	COL	2023-01-01	0.21	0.06	16.54	16.04	0.23	1.15	1.83			19.54	0.846469	0.27	0.0138178	145.455
Colombia	COL	2023-04-01	0.22	0.06	16.1	15.67	0.15	1.35	2.02			19.47	0.826913	0.28	0.0143811	211.111
Colombia	COL	2023-07-01	0.33	0.06	15.21	14.58	0.24	2.39	3.09			20.72	0.734073	0.39	0.0188224	143.75
Colombia	COL	2023-10-01	0.45	0.04	14.23	13.54	0.2	2.31	3.94			20.91	0.680536	0.49	0.0234338	133.333
Colombia	COL	2024-01-01	0.7	0.05	13.65	12.66	0.24	2.8	4.16			20.66	0.660697	0.75	0.036302	177.778
Colombia	COL	2024-04-01	0.79	0.04	14.95	13.96	0.16	1.97	3.08			20.31	0.736091	0.83	0.0408666	196.429
Colombia	COL	2024-07-01	0.9	0.04	16.34	15.17	0.23	1.94	2.98			21.33	0.766057	0.94	0.0440694	141.026
Colombia	COL	2024-10-01	0.91	0.02	13.87	12.7	0.24	2.5	4.26			20.95	0.662053	0.93	0.0443914	89.7959
Colombia	COL	2025-01-01	1.06	0.03	16.98	15.63	0.26	1.63	1.81			20.46	0.829912	1.09	0.0532747	45.3333
Colombia	COL	2025-04-01	0.99	0.04	18.47	17.26	0.18	0.47	1.74			20.68	0.893133	1.03	0.0498066	24.0964
Colombia	COL	2025-07-01	1.16	0.04	19.05	17.59	0.26	0.68	1.92			21.65	0.879908	1.2	0.0554273	27.6596
Colombia	COL	2025-10-01	1.26	0.04	19.19	17.63	0.26	0.75	1.65			21.64	0.886784	1.3	0.0600739	39.7849
Costa Rica	CRI	2019-01-01	0	0.64	2.6	1.54	0.06				0.36	2.65	0.981132	0.64	0.241509
Costa Rica	CRI	2019-04-01	0	0.37	2.75	2.03	0				0.35	2.79	0.985663	0.37	0.132616
Costa Rica	CRI	2019-07-01	0	0.38	2.96	2.15	0				0.43	2.96	1	0.38	0.128378
Costa Rica	CRI	2019-10-01	0	0.4	2.91	2.12	0.01				0.38	2.91	1	0.4	0.137457
Costa Rica	CRI	2020-01-01	0	0.62	2.85	1.72	0.05				0.46	2.86	0.996503	0.62	0.216783	-3.125
Costa Rica	CRI	2020-04-01	0	0.32	2.63	1.88	0				0.43	2.64	0.996212	0.32	0.121212	-13.5135
Costa Rica	CRI	2020-07-01	0	0.23	2.93	2.31	0				0.39	2.93	1	0.23	0.0784983	-39.4737
Costa Rica	CRI	2020-10-01	0	0.29	3.01	2.37	0.01				0.34	3.01	1	0.29	0.0963455	-27.5
Costa Rica	CRI	2021-01-01	0	0.58	2.93	1.84	0.06				0.45	2.93	1	0.58	0.197952	-6.45161
Costa Rica	CRI	2021-04-01	0	0.36	3.16	2.32	0.01				0.47	3.16	1	0.36	0.113924	12.5
Costa Rica	CRI	2021-07-01	0	0.25	3.14	2.52	0				0.37	3.14	1	0.25	0.0796178	8.69565
Costa Rica	CRI	2021-10-01	0	0.38	3.17	2.48	0.01				0.3	3.17	1	0.38	0.119874	31.0345
Costa Rica	CRI	2022-01-01	0	0.59	2.84	1.75	0.06				0.44	2.92	0.972603	0.59	0.202055	1.72414
Costa Rica	CRI	2022-04-01	0	0.25	3.11	2.42	0				0.44	3.12	0.996795	0.25	0.0801282	-30.5556
Costa Rica	CRI	2022-07-01	0	0.2	3.16	2.58	0				0.38	3.16	1	0.2	0.0632911	-20
Costa Rica	CRI	2022-10-01	0	0.32	3.12	2.42	0.01				0.37	3.12	1	0.32	0.102564	-15.7895
Costa Rica	CRI	2023-01-01	0	0.52	2.84	1.89	0.04				0.39	2.85	0.996491	0.52	0.182456	-11.8644
Costa Rica	CRI	2023-04-01	0	0.32	2.68	1.93	0				0.43	2.95	0.908475	0.32	0.108475	28
Costa Rica	CRI	2023-07-01	0	0.33	2.74	2.05	0				0.36	2.96	0.925676	0.33	0.111486	65
Costa Rica	CRI	2023-10-01	0	0.29	2.98	2.39	0.01				0.29	3.08	0.967532	0.29	0.0941558	-9.375
Costa Rica	CRI	2024-01-01	0	0.51	2.51	1.6	0.03				0.37	3.06	0.820261	0.51	0.166667	-1.92308
Costa Rica	CRI	2024-04-01	0	0.24	2.55	1.92	0.01				0.38	3.16	0.806962	0.24	0.0759494	-25
Costa Rica	CRI	2024-07-01	0	0.21	2.89	2.27	0				0.41	3.05	0.947541	0.21	0.0688525	-36.3636
Costa Rica	CRI	2024-10-01	0	0.27	3.23	2.61	0.01				0.34	3.24	0.996914	0.27	0.0833333	-6.89655
Costa Rica	CRI	2025-01-01	0	0.53	3.18	2.26	0.03				0.36	3.27	0.972477	0.53	0.16208	3.92157
Costa Rica	CRI	2025-04-01	0	0.38	3.35	2.56	0.01				0.4	3.39	0.988201	0.38	0.112094	58.3333
Costa Rica	CRI	2025-07-01	0	0.3	3.29	2.66	0				0.33	3.31	0.993958	0.3	0.0906344	42.8571
Costa Rica	CRI	2025-10-01	0	0.33	3.18	2.5	0.01				0.34	3.2	0.99375	0.33	0.103125	22.2222
Costa Rica	CRI	2026-01-01	0	0.59	3.1	2.1	0.03				0.38	3.22	0.962733	0.59	0.18323	11.3208
Costa Rica	CRI	2026-04-01	0	0.16	0.99	0.69	0.01				0.13	1.07	0.925234	0.16	0.149533	-57.8947
Croatia	HRV	2018-10-01	0	0.31	0.56	0.19	0.03	0.15	0.15		0.03	0.87	0.643678	0.31	0.356322
Croatia	HRV	2019-01-01	0.01	0.47	1.86	1.19	0.09	0.41	0.64		0.1	2.94	0.632653	0.48	0.163265
Croatia	HRV	2019-04-01	0.03	0.33	2.08	1.5	0.1	0.37	0.21		0.12	2.67	0.779026	0.36	0.134831
Croatia	HRV	2019-07-01	0.03	0.24	1.36	0.86	0.11	0.39	0.55		0.12	2.3	0.591304	0.27	0.117391
Croatia	HRV	2019-10-01	0.01	0.42	2.42	1.74	0.13	0.33	0.76		0.12	3.52	0.6875	0.43	0.122159	38.7097
Croatia	HRV	2020-01-01	0.01	0.45	1.99	1.29	0.12	0.24	0.8		0.12	3.05	0.652459	0.46	0.15082	-4.16667
Croatia	HRV	2020-04-01	0.03	0.41	1.58	0.9	0.12	0.11	0.49		0.12	2.18	0.724771	0.44	0.201835	22.2222
Croatia	HRV	2020-07-01	0.03	0.39	1.44	0.79	0.11	0.38	0.76		0.12	2.58	0.55814	0.42	0.162791	55.5556
Croatia	HRV	2020-10-01	0.01	0.45	2.53	1.82	0.13	0.38	0.9		0.12	3.83	0.660574	0.46	0.120104	6.97674
Croatia	HRV	2021-01-01	0.01	0.59	3.11	2.25	0.14	0.38	0.74		0.12	4.26	0.730047	0.6	0.140845	30.4348
Croatia	HRV	2021-04-01	0.03	0.41	2.3	1.61	0.13	0.14	0.36		0.12	2.81	0.818505	0.44	0.156584	0
Croatia	HRV	2021-07-01	0.03	0.38	1.6	0.93	0.14	0.42	0.69		0.12	2.71	0.590406	0.41	0.151292	-2.38095
Croatia	HRV	2021-10-01	0.01	0.69	2.46	1.46	0.18	0.4	0.86		0.12	3.72	0.66129	0.7	0.188172	52.1739
Croatia	HRV	2022-01-01	0.02	0.68	2.38	1.4	0.17	0.35	0.84		0.11	3.57	0.666667	0.7	0.196078	16.6667
Croatia	HRV	2022-04-01	0.08	0.48	1.83	1.01	0.15	0.34	0.62		0.11	2.79	0.655914	0.56	0.200717	27.2727
Croatia	HRV	2022-07-01	0.05	0.59	1.57	0.69	0.15	0.4	0.92		0.09	2.89	0.543253	0.64	0.221453	56.0976
Croatia	HRV	2022-10-01	0.02	0.54	2.19	1.37	0.17	0.33	0.81		0.09	3.35	0.653731	0.56	0.167164	-20
Croatia	HRV	2023-01-01	0.04	0.69	2.88	1.92	0.15	0.35	0.96		0.08	4.25	0.677647	0.73	0.171765	4.28571
Croatia	HRV	2023-04-01	0.12	0.61	2.81	1.87	0.15	0.17	0.76		0.06	3.77	0.745358	0.73	0.193634	30.3571
Croatia	HRV	2023-07-01	0.16	0.53	2.2	1.3	0.15	0.4	0.91		0.06	3.51	0.626781	0.69	0.196581	7.8125
Croatia	HRV	2023-10-01	0.08	0.7	2.79	1.79	0.16	0.29	0.78		0.06	3.88	0.719072	0.78	0.201031	39.2857
Croatia	HRV	2024-01-01	0.12	0.75	2.91	1.82	0.16	0	0.9		0.06	3.84	0.757813	0.87	0.226562	19.1781
Croatia	HRV	2024-04-01	0.26	0.5	2.25	1.28	0.15	0	0.52		0.06	2.8	0.803571	0.76	0.271429	4.10959
Croatia	HRV	2024-07-01	0.35	0.6	2.18	1.03	0.14	0.31	0.76		0.06	3.25	0.670769	0.95	0.292308	37.6812
Croatia	HRV	2024-10-01	0.12	0.77	2.51	1.38	0.15	0.42	0.69		0.09	3.64	0.68956	0.89	0.244505	14.1026
Croatia	HRV	2025-01-01	0.19	0.88	2.78	1.5	0.15	0	0.86		0.06	3.67	0.757493	1.07	0.291553	22.9885
Croatia	HRV	2025-04-01	0.45	0.72	2.58	1.19	0.15	0	0.27		0.07	2.86	0.902098	1.17	0.409091	53.9474
Croatia	HRV	2025-07-01	0.48	0.61	2.16	0.86	0.14	0.3	0.47		0.07	2.93	0.737201	1.09	0.372014	14.7368
Croatia	HRV	2025-10-01	0.2	0.88	2.31	1	0.16	0.36	0.78		0.07	3.46	0.66763	1.08	0.312139	21.3483
Croatia	HRV	2026-01-01	0.12	0.77	2.98	1.85	0.16	0.23	0.88		0.08	4.11	0.725061	0.89	0.216545	-16.8224
Croatia	HRV	2026-04-01	0.07	0.3	0.76	0.32	0.05	0	0.06		0.02	0.82	0.926829	0.37	0.45122	-68.3761
Cyprus	CYP	2017-01-01	0.03	0.08	0.11	0	0	0	0	0	0	1.4	0.0785714	0.11	0.0785714
Cyprus	CYP	2017-04-01	0.06	0.08	0.14	0	0	0	0	0	0	1.33	0.105263	0.14	0.105263
Cyprus	CYP	2017-07-01	0.06	0.06	0.12	0	0	0	0	0	0	1.82	0.0659341	0.12	0.0659341
Cyprus	CYP	2017-10-01	0.05	0.06	0.11	0	0	0	0	0	0	1.34	0.0820896	0.11	0.0820896
Cyprus	CYP	2018-01-01	0.05	0.08	0.13	0	0	0	0	0	0	1.34	0.0970149	0.13	0.0970149	18.1818
Cyprus	CYP	2018-04-01	0.06	0.06	0.12	0	0	0	0	0	0	1.41	0.0851064	0.12	0.0851064	-14.2857
Cyprus	CYP	2018-07-01	0.06	0.07	0.13	0	0	0	0	0	0	1.79	0.0726257	0.13	0.0726257	8.33333
Cyprus	CYP	2018-10-01	0.06	0.07	0.13	0	0	0	0	0	0	1.39	0.0935252	0.13	0.0935252	18.1818
Cyprus	CYP	2019-01-01	0.06	0.1	0.16	0	0	0	0	0	0	1.45	0.110345	0.16	0.110345	23.0769
Cyprus	CYP	2019-04-01	0.07	0.07	0.14	0	0	0	0	0	0	1.4	0.1	0.14	0.1	16.6667
Cyprus	CYP	2019-07-01	0.09	0.07	0.16	0	0	0	0	0	0	1.84	0.0869565	0.16	0.0869565	23.0769
Cyprus	CYP	2019-10-01	0.06	0.06	0.12	0	0	0	0	0	0	1.36	0.0882353	0.12	0.0882353	-7.69231
Cyprus	CYP	2020-01-01	0.07	0.1	0.18	0	0.01	0	0	0	0	1.45	0.124138	0.17	0.117241	6.25
Cyprus	CYP	2020-04-01	0.12	0.09	0.23	0	0.02	0	0	0	0	1.24	0.185484	0.21	0.169355	50
Cyprus	CYP	2020-07-01	0.12	0.06	0.18	0	0	0	0	0	0	1.79	0.100559	0.18	0.100559	12.5
Cyprus	CYP	2020-10-01	0.1	0.06	0.16	0	0	0	0	0	0	1.4	0.114286	0.16	0.114286	33.3333
Cyprus	CYP	2021-01-01	0.12	0.1	0.22	0	0	0	0	0	0	1.38	0.15942	0.22	0.15942	29.4118
Cyprus	CYP	2021-04-01	0.18	0.07	0.26	0	0.01	0	0	0	0	1.36	0.191176	0.25	0.183824	19.0476
Cyprus	CYP	2021-07-01	0.18	0.06	0.24	0	0	0	0	0	0	1.92	0.125	0.24	0.125	33.3333
Cyprus	CYP	2021-10-01	0.12	0.07	0.19	0	0	0	0	0	0	1.39	0.136691	0.19	0.136691	18.75
Cyprus	CYP	2022-01-01	0.12	0.08	0.2	0	0	0	0	0	0	1.58	0.126582	0.2	0.126582	-9.09091
Cyprus	CYP	2022-04-01	0.23	0.08	0.31	0	0	0	0	0	0	1.39	0.223022	0.31	0.223022	24
Cyprus	CYP	2022-07-01	0.24	0.07	0.31	0	0	0	0	0	0	1.86	0.166667	0.31	0.166667	29.1667
Cyprus	CYP	2022-10-01	0.17	0.05	0.22	0	0	0	0	0	0	1.35	0.162963	0.22	0.162963	15.7895
Cyprus	CYP	2023-01-01	0.18	0.07	0.25	0	0	0	0	0	0	1.44	0.173611	0.25	0.173611	25
Cyprus	CYP	2023-04-01	0.29	0.06	0.35	0	0	0	0	0	0	1.39	0.251799	0.35	0.251799	12.9032
Cyprus	CYP	2023-07-01	0.34	0.06	0.4	0	0	0	0	0	0	2.02	0.19802	0.4	0.19802	29.0323
Cyprus	CYP	2023-10-01	0.24	0.06	0.3	0	0	0	0	0	0	1.44	0.208333	0.3	0.208333	36.3636
Cyprus	CYP	2024-01-01	0.22	0.08	0.3	0	0	0	0	0	0	1.46	0.205479	0.3	0.205479	20
Cyprus	CYP	2024-04-01	0.37	0.06	0.43	0	0	0	0	0	0	1.59	0.27044	0.43	0.27044	22.8571
Cyprus	CYP	2024-07-01	0.44	0.06	0.5	0	0	0	0	0	0	2.09	0.239234	0.5	0.239234	25
Cyprus	CYP	2024-10-01	0.3	0.06	0.36	0	0	0	0	0	0	1.56	0.230769	0.36	0.230769	20
Cyprus	CYP	2025-01-01	0.28	0.06	0.34	0	0	0	0	0	0	1.57	0.216561	0.34	0.216561	13.3333
Cyprus	CYP	2025-04-01	0.47	0.06	0.53	0	0	0	0	0	0	1.57	0.33758	0.53	0.33758	23.2558
Cyprus	CYP	2025-07-01	0.54	0.06	0.6	0	0	0	0	0	0	2.13	0.28169	0.6	0.28169	20
Cyprus	CYP	2025-10-01	0.3	0.07	0.37	0	0	0	0	0	0	1.55	0.23871	0.37	0.23871	2.77778
Cyprus	CYP	2026-01-01	0.16	0.07	0.23	0	0	0	0	0	0	1.11	0.207207	0.23	0.207207	-32.3529
Czechia	CZE	2015-01-01	0.35	0.21	2.15	0.59	0.42	10.55	0.55	8.16	0.58	22.2	0.0968468	0.56	0.0252252
Czechia	CZE	2015-04-01	0.83	0.12	2.66	0.53	0.53	8.38	0.25	6.28	0.65	18.29	0.145435	0.95	0.051941
Czechia	CZE	2015-07-01	0.8	0.11	2.62	0.37	0.7	8.26	0.3	5.26	0.64	16.91	0.154938	0.91	0.0538143
Czechia	CZE	2015-10-01	0.25	0.16	2.12	0.4	0.67	10.05	0.69	5.62	0.64	19.08	0.111111	0.41	0.0214885
Czechia	CZE	2016-01-01	0.3	0.16	2.04	0.52	0.47	10.59	0.7	6.93	0.59	21.09	0.0967283	0.46	0.0218113	-17.8571
Czechia	CZE	2016-04-01	0.8	0.11	2.52	0.52	0.47	8.46	0.36	6.62	0.62	18.77	0.134257	0.91	0.0484816	-4.21053
Czechia	CZE	2016-07-01	0.81	0.07	2.55	0.58	0.44	8.47	0.84	4.13	0.65	16.71	0.152603	0.88	0.0526631	-3.2967
Czechia	CZE	2016-10-01	0.21	0.15	1.9	0.44	0.45	10.72	1.38	5.11	0.65	19.98	0.0950951	0.36	0.018018	-12.1951
Czechia	CZE	2017-01-01	0.36	0.15	2.1	0.44	0.5	11.22	1.06	6.75	0.65	21.88	0.0959781	0.51	0.023309	10.8696
Czechia	CZE	2017-04-01	0.84	0.12	2.64	0.51	0.51	8.51	0.55	6.34	0.66	18.8	0.140426	0.96	0.0510638	5.49451
Czechia	CZE	2017-07-01	0.72	0.09	2.29	0.39	0.5	7.79	0.84	6.15	0.59	17.75	0.129014	0.81	0.0456338	-7.95455
Czechia	CZE	2017-10-01	0.23	0.19	1.93	0.38	0.53	10.01	0.87	7.5	0.6	21.12	0.0913826	0.42	0.0198864	16.6667
Czechia	CZE	2018-01-01	0.31	0.16	2.2	0.54	0.6	10.35	0.87	6.73	0.59	20.93	0.105112	0.47	0.0224558	-7.84314
Czechia	CZE	2018-04-01	0.9	0.15	2.72	0.49	0.58	7.9	0.38	7.3	0.6	19.06	0.142707	1.05	0.0550892	9.375
Czechia	CZE	2018-07-01	0.83	0.1	2.5	0.43	0.54	8.67	0.93	6.5	0.6	19.18	0.130344	0.93	0.048488	14.8148
Czechia	CZE	2018-10-01	0.27	0.22	1.91	0.29	0.53	10.31	1.19	7.7	0.6	21.88	0.0872943	0.49	0.0223949	16.6667
Czechia	CZE	2019-01-01	0.39	0.24	2.31	0.6	0.5	10.14	1.25	7.22	0.58	21.62	0.106846	0.63	0.0291397	34.0426
Czechia	CZE	2019-04-01	0.83	0.15	2.59	0.59	0.43	7.31	0.94	7.08	0.59	18.65	0.138874	0.98	0.0525469	-6.66667
Czechia	CZE	2019-07-01	0.77	0.1	2.3	0.34	0.52	7.23	1.64	6.12	0.57	17.8	0.129213	0.87	0.0488764	-6.45161
Czechia	CZE	2019-10-01	0.26	0.21	1.98	0.39	0.51	9.05	1.51	8.18	0.61	21.51	0.0920502	0.47	0.0218503	-4.08163
Czechia	CZE	2020-01-01	0.38	0.26	2.21	0.47	0.49	8.79	1.62	6.84	0.61	20.27	0.109028	0.64	0.0315738	1.5873
Czechia	CZE	2020-04-01	0.82	0.14	2.55	0.45	0.56	5.18	1.28	6.62	0.58	16.39	0.155583	0.96	0.0585723	-2.04082
Czechia	CZE	2020-07-01	0.76	0.1	2.58	0.53	0.61	5.55	1.12	7.42	0.58	17.53	0.147176	0.86	0.0490588	-1.14943
Czechia	CZE	2020-10-01	0.19	0.21	2.31	0.62	0.67	8.58	1.39	7.48	0.62	20.67	0.111756	0.4	0.0193517	-14.8936
Czechia	CZE	2021-01-01	0.31	0.17	2.48	0.73	0.66	8.76	1.85	7.37	0.61	21.17	0.117147	0.48	0.0226736	-25
Czechia	CZE	2021-04-01	0.81	0.15	2.82	0.63	0.65	5.41	1.45	6.61	0.58	16.91	0.166765	0.96	0.0567711	0
Czechia	CZE	2021-07-01	0.76	0.09	2.66	0.62	0.61	6.52	1.06	6.83	0.58	17.64	0.150794	0.85	0.0481859	-1.16279
Czechia	CZE	2021-10-01	0.3	0.2	2.14	0.47	0.58	9.72	1.72	8.22	0.59	22.35	0.0957494	0.5	0.0223714	25
Czechia	CZE	2022-01-01	0.47	0.25	2.48	0.56	0.61	9.34	1.74	7.62	0.59	21.28	0.116541	0.72	0.0338346	50
Czechia	CZE	2022-04-01	0.88	0.13	2.72	0.49	0.63	6.86	1.17	6.79	0.59	17.63	0.154282	1.01	0.0572887	5.20833
Czechia	CZE	2022-07-01	0.77	0.11	2.59	0.55	0.58	7.8	1.09	6.93	0.58	18.5	0.14	0.88	0.0475676	3.52941
Czechia	CZE	2022-10-01	0.25	0.17	2.09	0.46	0.6	9.17	1.29	7.99	0.61	20.72	0.100869	0.42	0.0202703	-16
Czechia	CZE	2023-01-01	0.33	0.23	2.42	0.71	0.55	8.21	1.11	8	0.6	20	0.121	0.56	0.028	-22.2222
Czechia	CZE	2023-04-01	0.9	0.14	2.85	0.67	0.56	5.16	0.62	6.47	0.58	15.41	0.184945	1.04	0.0674886	2.9703
Czechia	CZE	2023-07-01	1.14	0.11	2.69	0.34	0.53	5.71	0.79	6.69	0.57	16.18	0.166255	1.25	0.0772559	42.0455
Czechia	CZE	2023-10-01	0.42	0.25	2.46	0.59	0.59	7.84	0.81	7.55	0.61	18.97	0.129678	0.67	0.0353189	59.5238
Czechia	CZE	2024-01-01	0.58	0.24	2.9	0.87	0.59	6.84	0.97	7.53	0.62	18.5	0.156757	0.82	0.0443243	46.4286
Czechia	CZE	2024-04-01	1.39	0.13	3.19	0.48	0.6	4.33	0.65	6.28	0.59	14.67	0.217451	1.52	0.103613	46.1538
Czechia	CZE	2024-07-01	1.45	0.13	3.07	0.48	0.42	4.9	0.57	7.26	0.59	16.01	0.191755	1.58	0.0986883	26.4
Czechia	CZE	2024-10-01	0.48	0.2	2.6	0.73	0.61	7.58	1.19	6.98	0.58	18.59	0.13986	0.68	0.0365788	1.49254
Czechia	CZE	2025-01-01	0.8	0.15	2.75	0.52	0.7	8.61	1.29	7.52	0.58	20.38	0.134936	0.95	0.0466143	15.8537
Czechia	CZE	2025-04-01	1.78	0.12	3.58	0.39	0.73	3.83	0.91	7.09	0.56	15.53	0.230522	1.9	0.122344	25
Czechia	CZE	2025-07-01	1.61	0.11	3.32	0.31	0.73	4.3	0.54	7.52	0.56	15.83	0.209728	1.72	0.108654	8.86076
Czechia	CZE	2025-10-01	0.51	0.22	2.43	0.39	0.73	6.99	0.93	8.16	0.58	18.62	0.130505	0.73	0.0392052	7.35294
Czechia	CZE	2026-01-01	0.73	0.19	2.58	0.38	0.7	8.44	1.83	6.92	0.58	19.88	0.129779	0.92	0.0462777	-3.15789
Czechia	CZE	2026-04-01	0.61	0.06	1.21	0.13	0.21	1.75	0.27	2.43	0.2	5.73	0.211169	0.67	0.116928	-64.7368
Denmark	DNK	2015-01-01	0.08	3.85	4.06		0.13	2.99	1.6			9.11	0.445664	3.93	0.431394
Denmark	DNK	2015-04-01	0.25	3.25	3.59		0.09	1.74	0.76			6.54	0.54893	3.5	0.535168
Denmark	DNK	2015-07-01	0.24	2.78	3.08		0.06	0.97	0.45			4.91	0.627291	3.02	0.615071
Denmark	DNK	2015-10-01	0.05	3.76	3.92		0.11	1.89	1.19			7.42	0.528302	3.81	0.513477
Denmark	DNK	2016-01-01	0.1	3.34	3.58		0.14	2.99	1.57			8.53	0.419695	3.44	0.403283	-12.4682
Denmark	DNK	2016-04-01	0.31	2.4	2.81		0.1	1.74	0.82			5.78	0.486159	2.71	0.468858	-22.5714
Denmark	DNK	2016-07-01	0.28	2.38	2.71		0.05	1.91	0.37			5.4	0.501852	2.66	0.492593	-11.9205
Denmark	DNK	2016-10-01	0.06	3.78	4		0.16	2.89	1.52			8.83	0.453001	3.84	0.434881	0.787402
Denmark	DNK	2017-01-01	0.09	3.69	5.55		1.77	2.28	0.78			9.17	0.605234	3.78	0.412214	9.88372
Denmark	DNK	2017-04-01	0.33	3.48	4.72		0.91	0.82	0.33			6.49	0.727273	3.81	0.587057	40.5904
Denmark	DNK	2017-07-01	0.27	2.65	3.34		0.42	0.78	0.29			4.93	0.677485	2.92	0.592292	9.77444
Denmark	DNK	2017-10-01	0.07	4.56	5.87		1.24	1.53	0.68			8.46	0.693853	4.63	0.547281	20.5729
Denmark	DNK	2018-01-01	0.09	3.75	5.51		1.67	2.76	1.15			9.79	0.562819	3.84	0.392237	1.5873
Denmark	DNK	2018-04-01	0.42	2.9	3.86		0.54	1.16	0.46			5.83	0.662093	3.32	0.569468	-12.8609
Denmark	DNK	2018-07-01	0.36	3.16	3.9		0.38	0.84	0.39			5.47	0.71298	3.52	0.64351	20.5479
Denmark	DNK	2018-10-01	0.09	4.12	5.46		1.25	1.68	0.84			8.37	0.65233	4.21	0.502987	-9.07127
Denmark	DNK	2019-01-01	0.13	4.75	6.3		1.42	1.83	0.97			9.51	0.662461	4.88	0.513144	27.0833
Denmark	DNK	2019-04-01	0.43	3.46	4.46		0.57	0.62	0.42			5.85	0.762393	3.89	0.664957	17.1687
Denmark	DNK	2019-07-01	0.34	3.3	4.02		0.38	0.34	0.45			5.21	0.771593	3.64	0.698656	3.40909
Denmark	DNK	2019-10-01	0.07	4.42	5.82		1.33	1.02	0.78			8.03	0.724782	4.49	0.559153	6.65083
Denmark	DNK	2020-01-01	0.15	5.85	7.19		1.19	1.46	0.6			9.65	0.745078	6	0.621762	22.9508
Denmark	DNK	2020-04-01	0.55	3.27	4.34		0.52	0.73	0.37			5.83	0.744425	3.82	0.655232	-1.79949
Denmark	DNK	2020-07-01	0.45	3.15	3.88		0.28	0.65	0.28			5.16	0.751938	3.6	0.697674	-1.0989
Denmark	DNK	2020-10-01	0.1	4.13	5.29		1.06	1.01	0.58			7.27	0.727648	4.23	0.581843	-5.79065
Denmark	DNK	2021-01-01	0.18	4.2	5.98		1.6	1.96	1			9.4	0.63617	4.38	0.465957	-27
Denmark	DNK	2021-04-01	0.59	3.39	5.17		1.19	1.04	0.57			7.26	0.712121	3.98	0.548209	4.18848
Denmark	DNK	2021-07-01	0.53	3.51	4.56		0.52	1.2	0.32			6.46	0.705882	4.04	0.625387	12.2222
Denmark	DNK	2021-10-01	0.11	4.99	6.66		1.56	1.63	0.74			9.51	0.700315	5.1	0.536278	20.5674
Denmark	DNK	2022-01-01	0.33	5.98	7.82		1.51	1.88	0.71			10.85	0.720737	6.31	0.581567	44.0639
Denmark	DNK	2022-04-01	0.83	3.71	5.3		0.76	1.11	0.42			7.23	0.733057	4.54	0.627939	14.0704
Denmark	DNK	2022-07-01	0.77	3.67	5.2		0.76	0.89	0.32			6.76	0.769231	4.44	0.656805	9.90099
Denmark	DNK	2022-10-01	0.17	5.61	6.86		1.08	1.2	0.67			9.15	0.749727	5.78	0.631694	13.3333
Denmark	DNK	2023-01-01	0.31	5.82	7.55		1.42	1.23	0.77			9.91	0.761857	6.13	0.618567	-2.85261
Denmark	DNK	2023-04-01	1.47	3.75	6.08		0.86	0.51	0.36			7.28	0.835165	5.22	0.717033	14.978
Denmark	DNK	2023-07-01	1.04	3.7	5.32		0.58	0.57	0.23			6.38	0.833856	4.74	0.742947	6.75676
Denmark	DNK	2023-10-01	0.2	6.18	7.28		0.9	1.01	0.59			9.16	0.79476	6.38	0.696507	10.3806
Denmark	DNK	2024-01-01	0.36	6.75	8.5		1.39	1.29	0.74			10.9	0.779817	7.11	0.652294	15.9869
Denmark	DNK	2024-04-01	1.59	4.42	6.7		0.69	0.48	0.31			7.74	0.865633	6.01	0.776486	15.1341
Denmark	DNK	2024-07-01	1.37	3.63	5.5		0.5	0.65	0.26			6.66	0.825826	5	0.750751	5.48523
Denmark	DNK	2024-10-01	0.33	5.67	7.41		1.41	0.86	0.54			9.16	0.808952	6	0.655022	-5.95611
Denmark	DNK	2025-01-01	0.62	5.32	7.38		1.44	0.98	0.63			9.36	0.788462	5.94	0.634615	-16.4557
Denmark	DNK	2025-04-01	1.69	3.89	6.06		0.48	0.39	0.32			7.08	0.855932	5.58	0.788136	-7.15474
Denmark	DNK	2025-07-01	1.64	3.98	6.06		0.44	0.29	0.25			6.88	0.880814	5.62	0.81686	12.4
Denmark	DNK	2025-10-01	0.37	6.08	7.7		1.25	0.76	0.55			9.38	0.820896	6.45	0.687633	7.5
Denmark	DNK	2026-01-01	0.57	6.54	8.83		1.72	0.67	0.46			10.52	0.839354	7.11	0.675856	19.697
Denmark	DNK	2026-04-01	0.64	1.51	2.58		0.43	0.11	0.04			2.94	0.877551	2.15	0.731293	-61.4695
Dominican Republic (the)	DOM	2022-10-01	0.2	0.22	0.83	0.38	0.03	1.76	1.71			5.32	0.156015	0.42	0.0789474
Dominican Republic (the)	DOM	2023-01-01	0.24	0.35	0.92	0.27	0.06	1.69	1.93			5.17	0.17795	0.59	0.11412
Dominican Republic (the)	DOM	2023-04-01	0.26	0.23	0.77	0.22	0.06	1.67	2.49			5.99	0.128548	0.49	0.081803
Dominican Republic (the)	DOM	2023-07-01	0.31	0.33	0.95	0.25	0.06	1.97	2.5			6.56	0.144817	0.64	0.097561
Dominican Republic (the)	DOM	2023-10-01	0.32	0.23	0.99	0.41	0.03	2.04	2.43			6.13	0.161501	0.55	0.0897227	30.9524
Dominican Republic (the)	DOM	2024-01-01	0.36	0.28	1.01	0.31	0.06	1.76	2.45			5.65	0.178761	0.64	0.113274	8.47458
Dominican Republic (the)	DOM	2024-04-01	0.36	0.25	1.08	0.41	0.06	1.9	2.6			6.36	0.169811	0.61	0.0959119	24.4898
Dominican Republic (the)	DOM	2024-07-01	0.41	0.33	1.19	0.39	0.06	1.91	2.74			7.04	0.169034	0.74	0.105114	15.625
Dominican Republic (the)	DOM	2024-10-01	0.33	0.18	0.92	0.37	0.04	1.89	2.56			6.18	0.148867	0.51	0.0825243	-7.27273
Dominican Republic (the)	DOM	2025-01-01	0.29	0.25	1.03	0.43	0.06	1.54	2.14			5.25	0.19619	0.54	0.102857	-15.625
Dominican Republic (the)	DOM	2025-04-01	0.56	0.38	1.41	0.41	0.06	1.72	2.26			5.9	0.238983	0.94	0.159322	54.0984
Dominican Republic (the)	DOM	2025-07-01	0.73	0.31	1.43	0.34	0.05	1.89	2.56			6.78	0.210914	1.04	0.153392	40.5405
Dominican Republic (the)	DOM	2025-10-01	0.58	0.22	1.21	0.37	0.04	1.7	2.46			5.96	0.20302	0.8	0.134228	56.8627
Dominican Republic (the)	DOM	2026-01-01	0.16	0.1	0.4	0.12	0.02	0.55	0.63			1.8	0.222222	0.26	0.144444	-51.8519
Ecuador	ECU	2019-01-01	0	0.02	6.28	6.25	0.01		0.37			8.06	0.779156	0.02	0.00248139
Ecuador	ECU	2019-04-01	0	0.03	6.4	6.35	0.02		0.39			8.17	0.783354	0.03	0.00367197
Ecuador	ECU	2019-07-01	0	0.03	6.07	5.81	0.23		0.34			7.98	0.760652	0.03	0.0037594
Ecuador	ECU	2019-10-01	0	0.01	6.44	6.23	0.2		0.34			8.04	0.800995	0.01	0.00124378
Ecuador	ECU	2020-01-01	0	0.02	6.51	6.47	0.02		0.34			8.23	0.791009	0.02	0.00243013	0
Ecuador	ECU	2020-04-01	0	0.03	6.23	6.18	0.02		0.28			7.42	0.839623	0.03	0.00404313	0
Ecuador	ECU	2020-07-01	0	0.03	6.35	6.1	0.22		0.31			7.89	0.804816	0.03	0.00380228	0
Ecuador	ECU	2020-10-01	0	0.01	5.78	5.57	0.2		0.31			7.66	0.754569	0.01	0.00130548	0
Ecuador	ECU	2021-01-01	0	0	6.56	6.56	0		0.32			8.06	0.813896	0	0	-100
Ecuador	ECU	2021-04-01	0	0.03	6.67	6.62	0.02		0.31			8.16	0.817402	0.03	0.00367647	0
Ecuador	ECU	2021-07-01	0	0.03	6.26	6.04	0.19		0.32			7.82	0.800512	0.03	0.00383632	0
Ecuador	ECU	2021-10-01	0	0	6.54	6.35	0.19		0.28			8.1	0.807407	0	0	-100
Ecuador	ECU	2022-01-01	0	0	6.19	6.18	0.01		0.28			8.23	0.752126	0	0
Ecuador	ECU	2022-04-01	0	0.02	6.72	6.68	0.02		0.29			8.35	0.80479	0.02	0.00239521	-33.3333
Ecuador	ECU	2022-07-01	0	0.03	6.66	6.42	0.21		0.3			8.32	0.800481	0.03	0.00360577	0
Ecuador	ECU	2022-10-01	0	0.01	5.5	5.35	0.14		0.27			8.02	0.685786	0.01	0.00124688
Ecuador	ECU	2023-01-01	0	0.03	5.66	5.63	0		0.26			8.21	0.689403	0.03	0.00365408
Ecuador	ECU	2023-04-01	0	0.05	7.7	7.64	0.01		0.25			9.32	0.82618	0.05	0.00536481	150
Ecuador	ECU	2023-07-01	0	0.07	7.06	6.84	0.15		0.26			9.03	0.781838	0.07	0.00775194	133.333
Ecuador	ECU	2023-10-01	0	0.05	5.47	5.23	0.19		0.27			8.52	0.642019	0.05	0.00586854	400
Ecuador	ECU	2024-01-01	0	0.04	6.66	6.61	0.01		0.24			9.04	0.736726	0.04	0.00442478	33.3333
Ecuador	ECU	2024-04-01	0	0.05	6.81	6.7	0.06		0.24			9.19	0.741023	0.05	0.0054407	0
Ecuador	ECU	2024-07-01	0	0.09	5.83	5.51	0.23		0.26			8.35	0.698204	0.09	0.0107784	28.5714
Ecuador	ECU	2024-10-01	0	0.04	4.02	3.8	0.18		0.29			7.35	0.546939	0.04	0.00544218	-20
Ecuador	ECU	2025-01-01	0	0.03	6.69	6.66	0		0.29			9.35	0.715508	0.03	0.00320856	-25
Ecuador	ECU	2025-04-01	0	0.05	7.53	7.48	0		0.28			9.62	0.782744	0.05	0.00519751	0
Ecuador	ECU	2025-07-01	0	0.07	7.36	7.07	0.22		0.23			9.25	0.795676	0.07	0.00756757	-22.2222
Ecuador	ECU	2025-10-01	0	0.03	7.14	6.92	0.19		0.26			9.65	0.739896	0.03	0.00310881	-25
Ecuador	ECU	2026-01-01	0	0.03	6.75	6.7	0.02		0.28			9.87	0.683891	0.03	0.00303951	0
Egypt	EGY	2016-01-01	0.04	0.35	3.03	2.64			26.89			41.43	0.0731354	0.39	0.00941347
Egypt	EGY	2016-04-01	0.06	0.56	4.81	4.19			30.42			48.21	0.0997718	0.62	0.0128604
Egypt	EGY	2016-07-01	0.07	0.74	4.63	3.82			36.44			53.5	0.0865421	0.81	0.0151402
Egypt	EGY	2016-10-01	0.05	0.51	3	2.44			32.33			44.37	0.0676133	0.56	0.0126211
Egypt	EGY	2017-01-01	0.1	0.38	2.9	2.42			30.01			41.48	0.0699132	0.48	0.0115718	23.0769
Egypt	EGY	2017-04-01	0.16	0.54	4.88	4.18			36.55			48.14	0.101371	0.7	0.0145409	12.9032
Egypt	EGY	2017-07-01	0.16	0.54	4.51	3.81			41.75			56.69	0.0795555	0.7	0.0123479	-13.5802
Egypt	EGY	2017-10-01	0.12	0.42	2.95	2.41			35.74			44.95	0.0656285	0.54	0.0120133	-3.57143
Egypt	EGY	2018-01-01	0.08	0.44	2.98	2.46			34.93			43.48	0.0685373	0.52	0.0119595	8.33333
Egypt	EGY	2018-04-01	0.14	0.76	4.97	4.07			40.38			51.02	0.0974128	0.9	0.0176401	28.5714
Egypt	EGY	2018-07-01	0.19	1.04	4.97	3.74			48.85			58.04	0.0856306	1.23	0.0211923	75.7143
Egypt	EGY	2018-10-01	0.12	0.68	3.1	2.3			40.56			46.27	0.0669981	0.8	0.0172898	48.1481
Egypt	EGY	2019-01-01	0.19	0.63	3.44	2.62			37.45			44.17	0.0778809	0.82	0.0185646	57.6923
Egypt	EGY	2019-04-01	0.34	1.14	6.07	4.59			42.26			50.95	0.119136	1.48	0.0290481	64.4444
Egypt	EGY	2019-07-01	0.27	0.92	4.58	3.39			43.65			53.77	0.0851776	1.19	0.0221313	-3.25203
Egypt	EGY	2019-10-01	0.35	1.17	4.9	3.38			39.5			46.28	0.105877	1.52	0.0328436	90
Egypt	EGY	2020-01-01	1.19	0.78	4.72	2.75	0		37.27			44.15	0.106908	1.97	0.0446206	140.244
Egypt	EGY	2020-04-01	1.36	1.34	7.35	4.65	0		38.48			47.27	0.15549	2.7	0.0571187	82.4324
Egypt	EGY	2020-07-01	1.3	1.62	7.85	4.93	0		49.96			58.68	0.133776	2.92	0.0497614	145.378
Egypt	EGY	2020-10-01	1.07	0.99	4.78	2.72	0		41.96			47.48	0.100674	2.06	0.0433867	35.5263
Egypt	EGY	2021-01-01	1.18	1.04	4.92	2.7	0		39.26			44.87	0.10965	2.22	0.0494763	12.6904
Egypt	EGY	2021-04-01	1.41	1.6	7.43	4.42	0		44.5			52.86	0.14056	3.01	0.0569429	11.4815
Egypt	EGY	2021-07-01	1.42	1.66	7.07	3.99	0		52.63			62.09	0.113867	3.08	0.0496054	5.47945
Egypt	EGY	2021-10-01	1.03	1.14	4.89	2.72	0		39.67			48.97	0.0998571	2.17	0.0443128	5.33981
Egypt	EGY	2022-01-01	1.12	1.14	4.95	2.66	0.03		37.07			47.45	0.10432	2.26	0.0476291	1.8018
Egypt	EGY	2022-04-01	1.41	1.81	7.7	4.45	0.03		40.15			54.57	0.141103	3.22	0.0590068	6.97674
Egypt	EGY	2022-07-01	1.38	1.85	7.88	4.62	0.03		46.78			63.89	0.123337	3.23	0.0505556	4.87013
Egypt	EGY	2022-10-01	1.07	1.3	5.64	3.24	0.03		36.87			50.26	0.112216	2.37	0.0471548	9.21659
Egypt	EGY	2023-01-01	1.24	1.04	5.18	2.9	0		36.97			47.84	0.108278	2.28	0.0476589	0.884956
Egypt	EGY	2023-04-01	1.44	1.43	7.56	4.69	0		42.5			54.07	0.139819	2.87	0.0530793	-10.8696
Egypt	EGY	2023-07-01	1.45	1.92	7.83	4.43	0.03		54.27			67.12	0.116657	3.37	0.0502086	4.33437
Egypt	EGY	2023-10-01	1.06	1.22	5.26	2.95	0.03		43.24			52.5	0.10019	2.28	0.0434286	-3.79747
Egypt	EGY	2024-01-01	1.26	1.09	5.53	3.15	0.03		40.8			50.09	0.110401	2.35	0.0469156	3.07018
Egypt	EGY	2024-04-01	1.49	1.99	8.03	4.52	0.03		46.94			59.31	0.13539	3.48	0.0586748	21.2544
Egypt	EGY	2024-07-01	1.54	1.61	7.75	4.57	0.03		59.93			73.22	0.105845	3.15	0.043021	-6.52819
Egypt	EGY	2024-10-01	1.5	1.99	7.08	3.56	0.03		42.87			53.91	0.13133	3.49	0.0647375	53.0702
Egypt	EGY	2025-01-01	1.72	1.93	7.23	3.55	0.03		41.55			52.62	0.1374	3.65	0.0693653	55.3191
Egypt	EGY	2025-04-01	2.4	2.44	8.85	3.98	0.03		47.02			60.21	0.146986	4.84	0.0803853	39.0805
Egypt	EGY	2025-07-01	1.86	3.33	10.04	4.82	0.03		58.74			74.21	0.135292	5.19	0.0699367	64.7619
Egypt	EGY	2025-10-01	1.35	2.14	7.67	4.15	0.03		45.9			57.81	0.132676	3.49	0.0603702	-1.11022e-14
El Salvador	SLV	2019-01-01	0.05	0	0.92	0.27	0.29		0		0.31	1.32	0.69697	0.05	0.0378788
El Salvador	SLV	2019-04-01	0.06	0	0.85	0.36	0.12		0		0.31	1.28	0.664062	0.06	0.046875
El Salvador	SLV	2019-07-01	0.06	0	0.77	0.33	0		0		0.38	1.31	0.587786	0.06	0.0458015
El Salvador	SLV	2019-10-01	0.07	0	1.07	0.49	0.13		0		0.38	1.3	0.823077	0.07	0.0538462
El Salvador	SLV	2020-01-01	0.13	0	1.02	0.21	0.32		0		0.36	1.31	0.778626	0.13	0.0992366	160
El Salvador	SLV	2020-04-01	0.12	0	1.08	0.47	0.13		0		0.36	1.35	0.8	0.12	0.0888889	100
El Salvador	SLV	2020-07-01	0.13	0	1.18	0.69	0		0		0.36	1.37	0.861314	0.13	0.0948905	116.667
El Salvador	SLV	2020-10-01	0.12	0.01	1.23	0.63	0.1		0		0.37	1.36	0.904412	0.13	0.0955882	85.7143
El Salvador	SLV	2021-01-01	0.15	0.04	1.25	0.38	0.32		0		0.36	1.35	0.925926	0.19	0.140741	46.1538
El Salvador	SLV	2021-04-01	0.14	0.02	0.98	0.34	0.14		0		0.34	1.29	0.75969	0.16	0.124031	33.3333
El Salvador	SLV	2021-07-01	0.14	0.01	1.23	0.68	0.01		0		0.39	1.39	0.884892	0.15	0.107914	15.3846
El Salvador	SLV	2021-10-01	0.14	0.06	1.04	0.33	0.15		0		0.36	1.32	0.787879	0.2	0.151515	53.8462
El Salvador	SLV	2022-01-01	0.29	0.06	1.32	0.27	0.32		0.04		0.38	1.65	0.8	0.35	0.212121	84.2105
El Salvador	SLV	2022-04-01	0.27	0.02	1.28	0.5	0.11		0.42		0.38	1.86	0.688172	0.29	0.155914	81.25
El Salvador	SLV	2022-07-01	0.28	0.02	1.47	0.81	0		0.31		0.36	1.79	0.821229	0.3	0.167598	100
El Salvador	SLV	2022-10-01	0.29	0.04	1.43	0.62	0.13		0.27		0.35	1.75	0.817143	0.33	0.188571	65
El Salvador	SLV	2023-01-01	0.31	0.05	1.37	0.33	0.33		0.53		0.35	1.95	0.702564	0.36	0.184615	2.85714
El Salvador	SLV	2023-04-01	0.3	0.02	1.05	0.25	0.11		0.71		0.37	2.16	0.486111	0.32	0.148148	10.3448
El Salvador	SLV	2023-07-01	0.32	0.04	1.13	0.38	0		0.71		0.39	2.05	0.55122	0.36	0.17561	20
El Salvador	SLV	2023-10-01	0.28	0.06	1.41	0.6	0.1		0.53		0.37	1.97	0.715736	0.34	0.172589	3.0303
El Salvador	SLV	2024-01-01	0.34	0.05	1.35	0.24	0.34		0.63		0.38	2.07	0.652174	0.39	0.188406	8.33333
El Salvador	SLV	2024-04-01	0.28	0.01	1.24	0.46	0.12		0.65		0.37	2.13	0.58216	0.29	0.13615	-9.375
El Salvador	SLV	2024-07-01	0.34	0.02	1.73	1.01	0		0.34		0.36	2.22	0.779279	0.36	0.162162	0
El Salvador	SLV	2024-10-01	0.3	0.06	1.32	0.49	0.11		0.5		0.36	1.9	0.694737	0.36	0.189474	5.88235
El Salvador	SLV	2025-01-01	0.34	0.06	1.4	0.29	0.33		0.55		0.38	2.06	0.679612	0.4	0.194175	2.5641
El Salvador	SLV	2025-04-01	0.34	0.03	1.26	0.44	0.08		0.64		0.37	2.13	0.591549	0.37	0.173709	27.5862
Estonia	EST	2015-01-01	0	0.21	0.35	0	0.14		0		0	2.59	0.135135	0.21	0.0810811
Estonia	EST	2015-04-01	0	0.14	0.28	0	0.12		0		0.02	1.91	0.146597	0.14	0.0732984
Estonia	EST	2015-07-01	0	0.1	0.26	0	0.13		0		0.03	2.01	0.129353	0.1	0.0497512
Estonia	EST	2015-10-01	0	0.18	0.36	0	0.15		0		0.03	2.31	0.155844	0.18	0.0779221
Estonia	EST	2016-01-01	0	0.13	0.31	0	0.15		0		0.03	2.42	0.128099	0.13	0.053719	-38.0952
Estonia	EST	2016-04-01	0	0.1	0.23	0	0.13		0		0	1.95	0.117949	0.1	0.0512821	-28.5714
Estonia	EST	2016-07-01	0	0.11	0.21	0	0.1		0		0	2.74	0.0766423	0.11	0.040146	10
Estonia	EST	2016-10-01	0	0.19	0.32	0	0.13		0		0	2.99	0.107023	0.19	0.0635452	5.55556
Estonia	EST	2017-01-01	0	0.19	0.34	0	0.15		0.01		0	3.1	0.109677	0.19	0.0612903	46.1538
Estonia	EST	2017-04-01	0	0.15	0.29	0	0.14		0		0	2.72	0.106618	0.15	0.0551471	50
Estonia	EST	2017-07-01	0	0.14	0.27	0	0.13		0		0	2.4	0.1125	0.14	0.0583333	27.2727
Estonia	EST	2017-10-01	0	0.22	0.38	0	0.14		0		0.02	2.71	0.140221	0.22	0.0811808	15.7895
Estonia	EST	2018-01-01	0	0.15	0.3	0	0.15		0.02		0	3.03	0.0990099	0.15	0.049505	-21.0526
Estonia	EST	2018-04-01	0	0.13	0.25	0	0.12		0		0	2.31	0.108225	0.13	0.0562771	-13.3333
Estonia	EST	2018-07-01	0	0.15	0.29	0	0.13		0		0.01	2.49	0.116466	0.15	0.060241	7.14286
Estonia	EST	2018-10-01	0	0.19	0.34	0	0.15		0		0	2.38	0.142857	0.19	0.0798319	-13.6364
Estonia	EST	2019-01-01	0	0.23	0.38	0	0.15		0		0	2.28	0.166667	0.23	0.100877	53.3333
Estonia	EST	2019-04-01	0	0.13	0.26	0	0.13		0		0	1.27	0.204724	0.13	0.102362	0
Estonia	EST	2019-07-01	0	0.14	0.28	0	0.13		0		0.01	1.09	0.256881	0.14	0.12844	-6.66667
Estonia	EST	2019-10-01	0	0.21	0.38	0	0.17		0		0	1.31	0.290076	0.21	0.160305	10.5263
Estonia	EST	2020-01-01	0.01	0.31	0.47	0	0.15		0		0	1.07	0.439252	0.32	0.299065	39.1304
Estonia	EST	2020-04-01	0.05	0.19	0.37	0	0.13		0		0	0.82	0.45122	0.24	0.292683	84.6154
Estonia	EST	2020-07-01	0.05	0.16	0.35	0	0.14		0		0	1.25	0.28	0.21	0.168	50
Estonia	EST	2020-10-01	0.01	0.23	0.39	0	0.15		0		0	1.26	0.309524	0.24	0.190476	14.2857
Estonia	EST	2021-01-01	0.02	0.19	0.37	0	0.16		0		0	1.38	0.268116	0.21	0.152174	-34.375
Estonia	EST	2021-04-01	0.13	0.14	0.38	0	0.11		0		0	1.12	0.339286	0.27	0.241071	12.5
Estonia	EST	2021-07-01	0.13	0.18	0.39	0	0.08		0		0	1.42	0.274648	0.31	0.21831	47.619
Estonia	EST	2021-10-01	0.03	0.27	0.42	0	0.12		0		0	1.92	0.21875	0.3	0.15625	25
Estonia	EST	2022-01-01	0.07	0.25	0.46	0	0.14		0		0	1.79	0.256983	0.32	0.178771	52.381
Estonia	EST	2022-04-01	0.24	0.14	0.59	0	0.21		0		0	1.7	0.347059	0.38	0.223529	40.7407
Estonia	EST	2022-07-01	0.22	0.11	0.54	0	0.21		0		0	1.75	0.308571	0.33	0.188571	6.45161
Estonia	EST	2022-10-01	0.03	0.18	0.39	0	0.18		0.01		0	1.81	0.21547	0.21	0.116022	-30
Estonia	EST	2023-01-01	0.05	0.24	0.41	0	0.12		0		0	1.36	0.301471	0.29	0.213235	-9.375
Estonia	EST	2023-04-01	0.34	0.17	0.6	0	0.09		0		0	1.13	0.530973	0.51	0.451327	34.2105
Estonia	EST	2023-07-01	0.29	0.17	0.57	0	0.11		0		0	0.98	0.581633	0.46	0.469388	39.3939
Estonia	EST	2023-10-01	0.05	0.22	0.45	0	0.18		0		0	1.16	0.387931	0.27	0.232759	28.5714
Estonia	EST	2024-01-01	0.05	0.29	0.49	0	0.15		0		0	1.28	0.382812	0.34	0.265625	17.2414
Estonia	EST	2024-04-01	0.42	0.19	0.7	0	0.09		0		0	1.2	0.583333	0.61	0.508333	19.6078
Estonia	EST	2024-07-01	0.41	0.18	0.65	0	0.06		0		0	1.1	0.590909	0.59	0.536364	28.2609
Estonia	EST	2024-10-01	0.08	0.51	0.73	0	0.14		0		0	1.28	0.570312	0.59	0.460937	118.519
Estonia	EST	2025-01-01	0.14	0.4	0.69	0	0.15		0		0	1.44	0.479167	0.54	0.375	58.8235
Estonia	EST	2025-04-01	0.45	0.29	0.84	0	0.1		0		0	1.32	0.636364	0.74	0.560606	21.3115
Estonia	EST	2025-07-01	0.39	0.22	0.67	0	0.06		0		0	0.86	0.77907	0.61	0.709302	3.38983
Estonia	EST	2025-10-01	0.04	0.36	0.52	0	0.12		0		0	1.09	0.477064	0.4	0.366972	-32.2034
Estonia	EST	2026-01-01	0.14	0.35	0.64	0	0.15		0		0	1.39	0.460432	0.49	0.352518	-9.25926
Estonia	EST	2026-04-01	0.13	0.12	0.28	0	0.03		0		0	0.38	0.736842	0.25	0.657895	-66.2162
Finland	FIN	2017-01-01	0	1.19	7.77	3.27	3.22	2.25	1.72	5.93	0.09	19.63	0.395823	1.19	0.0606215
Finland	FIN	2017-04-01	0	0.8	7.05	3.7	2.47	1.53	0.44	4.65	0.08	14.66	0.4809	0.8	0.0545703
Finland	FIN	2017-07-01	0	0.76	6.88	3.9	2.14	0.56	0.21	5.09	0.08	13.42	0.512668	0.76	0.0566319
Finland	FIN	2017-10-01	0	1.37	8.76	4.05	3.25	1.5	0.85	5.91	0.09	18.37	0.476864	1.37	0.0745781
Finland	FIN	2018-01-01	0	1.28	9.18	4.24	3.57	2.38	1.94	6.01	0.09	21.56	0.425788	1.28	0.0593692	7.56303
Finland	FIN	2018-04-01	0.03	1.17	7.73	3.88	2.57	1.03	0.28	4.82	0.08	14.96	0.516711	1.2	0.0802139	50
Finland	FIN	2018-07-01	0.04	1.3	6.35	2.26	2.68	0.84	0.61	5.18	0.07	14.18	0.447814	1.34	0.0944993	76.3158
Finland	FIN	2018-10-01	0.01	1.64	8.48	3	3.74	1.71	1.24	5.87	0.09	18.88	0.449153	1.65	0.0873941	20.438
Finland	FIN	2019-01-01	0.01	1.76	8.41	2.8	3.78	2.14	1.86	6.02	0.06	20.18	0.416749	1.77	0.0877106	38.2812
Finland	FIN	2019-04-01	0.07	1.32	8.2	4.02	2.75	0.74	0.46	5.25	0.04	15.47	0.530058	1.39	0.0898513	15.8333
Finland	FIN	2019-07-01	0.09	1.12	6.23	2.52	2.44	0.43	0.47	5.45	0.06	13.42	0.464232	1.21	0.0901639	-9.70149
Finland	FIN	2019-10-01	0.01	1.47	7.89	3.17	3.18	1.36	1.15	6.16	0.06	17.99	0.438577	1.48	0.0822679	-10.303
Finland	FIN	2020-01-01	0.03	2.47	9.71	4.32	2.83	1.15	1.16	6.06	0.06	19.33	0.502328	2.5	0.129333	41.2429
Finland	FIN	2020-04-01	0.15	1.28	7.97	4.11	2.37	0.61	0.79	5.33	0.06	15.48	0.514858	1.43	0.0923773	2.8777
Finland	FIN	2020-07-01	0.13	1.35	6.74	3.2	2.02	0.28	0.83	5.29	0.04	13.65	0.493773	1.48	0.108425	22.314
Finland	FIN	2020-10-01	0.01	2.13	9.18	4.29	2.7	0.99	1.28	5.65	0.05	18.13	0.506343	2.14	0.118036	44.5946
Finland	FIN	2021-01-01	0.03	1.98	9.69	4.17	3.46	1.55	2.1	6.04	0.05	20.97	0.462089	2.01	0.0958512	-19.6
Finland	FIN	2021-04-01	0.2	1.51	8.59	4.41	2.44	0.45	0.59	4.92	0.03	15.31	0.561071	1.71	0.111692	19.5804
Finland	FIN	2021-07-01	0.14	1.59	7.09	3.06	2.27	0.31	0.28	5.5	0.03	13.83	0.512654	1.73	0.12509	16.8919
Finland	FIN	2021-10-01	0.01	2.82	10.64	4.06	3.72	1.19	0.64	6.16	0.03	20.09	0.529617	2.83	0.140866	32.243
Finland	FIN	2022-01-01	0.04	3.42	10.42	3.54	3.41	1.28	0.51	6.16	0.01	20	0.521	3.46	0.173	72.1393
Finland	FIN	2022-04-01	0.18	2.15	9.27	4.22	2.72	0.61	0.12	5.51	0	16.59	0.55877	2.33	0.140446	36.2573
Finland	FIN	2022-07-01	0.16	2.29	7.99	3	2.54	0.31	0.11	6.05	0	15.05	0.530897	2.45	0.162791	41.6185
Finland	FIN	2022-10-01	0.01	3.25	9.66	2.82	3.58	1.61	0.34	6.39	0	19.15	0.504439	3.26	0.170235	15.1943
Finland	FIN	2023-01-01	0.04	4.57	11.78	3.56	3.61	1.17	0.32	6.85	0	21.32	0.552533	4.61	0.216229	33.237
Finland	FIN	2023-04-01	0.32	2.91	9.01	3.72	2.06	0.21	0.09	8.49	0	18.26	0.493428	3.23	0.176889	38.6266
Finland	FIN	2023-07-01	0.25	2.83	8.39	3.6	1.71	0.09	0.04	8.17	0	17.01	0.493239	3.08	0.18107	25.7143
Finland	FIN	2023-10-01	0.04	3.71	11.28	4.38	3.15	0.48	0.21	9.18	0	22.2	0.508108	3.75	0.168919	15.0307
Finland	FIN	2024-01-01	0.08	5.17	12.39	3.75	3.39	0.64	0.4	8.33	0	23.05	0.537527	5.25	0.227766	13.8829
Finland	FIN	2024-04-01	0.44	3.21	9.96	4.35	1.96	0.19	0.07	6.37	0	17.26	0.577057	3.65	0.211472	13.0031
Finland	FIN	2024-07-01	0.39	3.83	9	3.05	1.71	0.01	0.03	7.91	0.02	17.53	0.513406	4.22	0.24073	37.013
Finland	FIN	2024-10-01	0.05	7.25	13.05	3.21	2.47	0.22	0.16	8.45	0.07	22.94	0.568875	7.3	0.318221	94.6667
Finland	FIN	2025-01-01	0.1	6.48	13.31	3.31	3.34	0.33	0.37	7.76	0.08	23.04	0.577691	6.58	0.28559	25.3333
Finland	FIN	2025-04-01	0.43	4.4	10.47	3.52	2.08	0.01	0.09	6.33	0.04	17.6	0.594886	4.83	0.274432	32.3288
Finland	FIN	2025-07-01	0.42	3.85	8.26	2.4	1.56	0.01	0.06	8.19	0.03	16.95	0.487316	4.27	0.251917	1.18483
Finland	FIN	2025-10-01	0.05	6.83	12.72	3.27	2.5	0.04	0.27	9	0.07	22.94	0.55449	6.88	0.299913	-5.75342
Finland	FIN	2026-01-01	0.11	5.76	13.12	3.34	3.81	0.23	1.11	9.05	0.1	25.08	0.523126	5.87	0.234051	-10.7903
Finland	FIN	2026-04-01	0.11	1.6	3.73	1.02	0.97	0.01	0	2.52	0.03	6.46	0.577399	1.71	0.264706	-64.5963
France	FRA	2015-01-01	1.11	5.62	25.19	18	0.46	4.53	9.15	117.81		157.96	0.159471	6.73	0.0426057
France	FRA	2015-04-01	2.43	4.05	23.45	16.52	0.45	0.7	2.25	91.97		119.26	0.196629	6.48	0.0543351
France	FRA	2015-07-01	2.37	4.09	16.86	9.91	0.49	1.02	2.69	95.62		117.01	0.14409	6.46	0.055209
France	FRA	2015-10-01	1.13	5.83	17.36	9.89	0.51	2.54	8.92	110.04		139.9	0.124089	6.96	0.0497498
France	FRA	2016-01-01	1.32	7.55	26.47	16.99	0.61	2.13	10.11	115.74		155.39	0.170346	8.87	0.0570822	31.7979
France	FRA	2016-04-01	2.57	4.07	25.33	18.04	0.65	0.82	4.39	88.8		120.02	0.211048	6.64	0.0553241	2.46914
France	FRA	2016-07-01	2.88	3.1	18.11	11.52	0.61	1.09	6.67	81.67		108.47	0.166959	5.98	0.0551305	-7.43034
France	FRA	2016-10-01	1.24	4.9	17.42	10.65	0.63	3.44	14.75	96.47		133.56	0.130428	6.14	0.0459718	-11.7816
France	FRA	2017-01-01	1.52	6.73	23.24	14.35	0.64	3.05	15.32	108.13		151.48	0.15342	8.25	0.0544626	-6.98985
France	FRA	2017-04-01	3.19	4.33	21.68	13.39	0.77	1.79	5.94	88.51		118.76	0.182553	7.52	0.063321	13.253
France	FRA	2017-07-01	2.81	4.48	17.66	9.48	0.89	1.69	6.13	85.88		112.23	0.157355	7.29	0.0649559	21.9064
France	FRA	2017-10-01	1.37	7.31	19.83	10.39	0.76	3.48	13.56	95.51		133.46	0.148584	8.68	0.0650382	41.3681
France	FRA	2018-01-01	1.49	9.12	30.71	19.22	0.88	2.19	11.29	112.53		157.87	0.194527	10.61	0.0672072	28.6061
France	FRA	2018-04-01	3.12	5.01	29.11	20.07	0.91	0.74	2.18	89.43		122.32	0.237982	8.13	0.066465	8.1117
France	FRA	2018-07-01	3.64	4.17	19.54	10.84	0.89	1.47	5.34	87.07		114.31	0.170939	7.81	0.068323	7.13306
France	FRA	2018-10-01	1.47	8.51	21.18	10.39	0.81	1.71	11.13	102.81		137.85	0.153645	9.98	0.0723975	14.977
France	FRA	2019-01-01	2.18	9.46	26.16	13.75	0.77	0.68	12.86	111.35		152.04	0.17206	11.64	0.0765588	9.70782
France	FRA	2019-04-01	3.72	6.36	25.37	14.56	0.73	0.04	5.64	91.63		123.39	0.205608	10.08	0.0816922	23.9852
France	FRA	2019-07-01	4.02	5.97	20.58	9.74	0.85	0.13	7.42	84.19		113.1	0.181963	9.99	0.0883289	27.9129
France	FRA	2019-10-01	1.49	10.93	29.27	16.13	0.72	0.77	11.95	90.81		133.7	0.218923	12.42	0.0928945	24.4489
France	FRA	2020-01-01	2.2	13.78	35.03	18.33	0.72	0.28	12.15	100.82		149.2	0.234786	15.98	0.107105	37.2852
France	FRA	2020-04-01	4.22	6.86	28.23	16.43	0.72	0.07	4.05	72.62		105.65	0.267203	11.08	0.104875	9.92063
France	FRA	2020-07-01	4.31	6.24	21.67	10.4	0.72	0.54	7.45	66.9		97.36	0.222576	10.55	0.108361	5.60561
France	FRA	2020-10-01	1.71	11.48	27.76	13.82	0.75	0.58	10.85	93.9		133.97	0.207211	13.19	0.0984549	6.19968
France	FRA	2021-01-01	2.33	11.34	32.93	18.51	0.75	1.41	12.14	98.88		146.38	0.224962	13.67	0.0933871	-14.4556
France	FRA	2021-04-01	4.5	7.9	28.37	15.23	0.74	0.27	5.29	82.18		116.8	0.242894	12.4	0.106164	11.9134
France	FRA	2021-07-01	4.6	6.03	23.66	12.18	0.85	0.66	3.72	86.24		115.01	0.205721	10.63	0.0924267	0.758294
France	FRA	2021-10-01	2.22	9.9	23.31	10.42	0.77	1.74	11.32	92.22		129.58	0.179889	12.12	0.093533	-8.11221
France	FRA	2022-01-01	2.77	10.95	27.37	12.79	0.86	1.82	13.18	91.39		134.81	0.203026	13.72	0.101773	0.365764
France	FRA	2022-04-01	5.98	7.09	26.57	12.47	1.03	0.13	8.12	62.25		97.79	0.271705	13.07	0.133654	5.40323
France	FRA	2022-07-01	6.54	6.28	21.22	7.53	0.87	0.06	8.76	54.93		85.72	0.24755	12.82	0.149557	20.6021
France	FRA	2022-10-01	2.68	12.58	26.26	10.22	0.78	1.04	12.24	69.47		109.74	0.239293	15.26	0.139056	25.9076
France	FRA	2023-01-01	3.61	13.75	30.76	12.59	0.81	0.62	12.21	84.87		129.31	0.237878	17.36	0.134251	26.5306
France	FRA	2023-04-01	7.17	9.51	31.32	13.83	0.81	0.06	4.47	72.61		109.02	0.287287	16.68	0.152999	27.6205
France	FRA	2023-07-01	7.53	8.44	26.14	9.37	0.8	0.08	4.59	74.52		105.88	0.246883	15.97	0.150831	24.571
France	FRA	2023-10-01	3.28	16.7	35.71	14.89	0.84	0.12	6.72	86.96		130.06	0.274566	19.98	0.153621	30.9305
France	FRA	2024-01-01	3.88	15.16	38.19	18.4	0.75	0.23	8.21	96.28		143.72	0.265725	19.04	0.13248	9.67742
France	FRA	2024-04-01	7.42	9.38	34.89	17.3	0.79	0	1.37	80.54		117.5	0.296936	16.8	0.142979	0.719424
France	FRA	2024-07-01	8.28	8.53	29.84	12.24	0.79	0.08	1.87	84.16		116.72	0.255655	16.81	0.14402	5.25986
France	FRA	2024-10-01	3.74	12.8	32.69	15.38	0.77	0.29	5.77	99.12		138.82	0.235485	16.54	0.119147	-17.2172
France	FRA	2025-01-01	5.19	13.44	35.63	16.23	0.77	0.66	7.75	102.7		147.74	0.241167	18.63	0.1261	-2.15336
France	FRA	2025-04-01	9.92	9.54	33.03	12.85	0.72	0	1.36	78.51		113.87	0.290068	19.46	0.170897	15.8333
France	FRA	2025-07-01	10.39	9.38	29.17	8.86	0.54	0	2.03	86.98		119.21	0.244694	19.77	0.165842	17.6086
France	FRA	2025-10-01	4.77	16.26	35.36	13.67	0.66	0.66	5.23	103.53		145.83	0.242474	21.03	0.144209	27.1463
France	FRA	2026-01-01	5.63	16.84	39.66	16.32	0.87	0.38	6.52	103.62		151.17	0.262354	22.47	0.148641	20.6119
France	FRA	2026-04-01	3.47	3.58	11.48	4.1	0.33	0	0.52	29.16		41.48	0.27676	7.05	0.169961	-63.7718
Georgia	GEO	2010-01-01	0	0	2.23	2.23			0.27			2.5	0.892	0	0
Georgia	GEO	2010-04-01	0	0	2.68	2.68			0			2.68	1	0	0
Georgia	GEO	2010-07-01	0	0	2.42	2.42			0.07			2.49	0.971888	0	0
Georgia	GEO	2010-10-01	0	0	2.02	2.02			0.32			2.34	0.863248	0	0
Georgia	GEO	2011-01-01	0	0	1.47	1.47			1.04			2.51	0.585657	0	0
Georgia	GEO	2011-04-01	0	0	2.49	2.49			0.19			2.68	0.929104	0	0
Georgia	GEO	2011-07-01	0	0	2.21	2.21			0.24			2.45	0.902041	0	0
Georgia	GEO	2011-10-01	0	0	1.7	1.7			0.74			2.44	0.696721	0	0
Georgia	GEO	2012-01-01	0	0	1.29	1.29			1.17			2.46	0.52439	0	0
Georgia	GEO	2012-04-01	0	0	2.38	2.38			0.11			2.49	0.955823	0	0
Georgia	GEO	2012-07-01	0	0	2.1	2.1			0.33			2.43	0.864198	0	0
Georgia	GEO	2012-10-01	0	0	1.46	1.46			0.87			2.33	0.626609	0	0
Georgia	GEO	2013-01-01	0	0	1.61	1.61			0.84			2.45	0.657143	0	0
Georgia	GEO	2013-04-01	0	0	2.57	2.57			0.02			2.59	0.992278	0	0
Georgia	GEO	2013-07-01	0	0	2.24	2.24			0.17			2.41	0.929461	0	0
Georgia	GEO	2013-10-01	0	0	1.85	1.85			0.74			2.59	0.714286	0	0
Georgia	GEO	2014-01-01	0	0	1.63	1.63			0.95			2.58	0.631783	0	0
Georgia	GEO	2014-04-01	0	0	2.55	2.55			0.1			2.65	0.962264	0	0
Georgia	GEO	2014-07-01	0	0	2.36	2.36			0.24			2.6	0.907692	0	0
Georgia	GEO	2014-10-01	0	0	1.79	1.79			0.76			2.55	0.701961	0	0
Georgia	GEO	2015-01-01	0	0	1.68	1.68			0.99			2.67	0.629213	0	0
Georgia	GEO	2015-04-01	0	0	2.79	2.79			0.12			2.91	0.958763	0	0
Georgia	GEO	2015-07-01	0	0	2.29	2.29			0.4			2.69	0.851301	0	0
Georgia	GEO	2015-10-01	0	0	1.7	1.7			0.89			2.59	0.656371	0	0
Georgia	GEO	2016-01-01	0	0	1.87	1.87			0.76			2.63	0.711027	0	0
Georgia	GEO	2016-04-01	0	0	2.89	2.89			0.14			3.03	0.953795	0	0
Georgia	GEO	2016-07-01	0	0	2.59	2.59			0.22			2.81	0.921708	0	0
Georgia	GEO	2016-10-01	0	0.01	1.98	1.97			1.1			3.08	0.642857	0.01	0.00324675
Georgia	GEO	2017-01-01	0	0.03	1.49	1.46			1.02			2.51	0.593625	0.03	0.0119522
Georgia	GEO	2017-04-01	0	0.03	2.96	2.93			0.09			3.05	0.970492	0.03	0.00983607
Georgia	GEO	2017-07-01	0	0.03	2.91	2.88			0.2			3.11	0.935691	0.03	0.0096463
Georgia	GEO	2017-10-01	0	0.03	1.95	1.92			0.93			2.88	0.677083	0.03	0.0104167	200
Georgia	GEO	2018-01-01	0	0.03	2.07	2.04			0.87			2.94	0.704082	0.03	0.0102041	0
Georgia	GEO	2018-04-01	0	0.03	3.33	3.3			0.12			3.45	0.965217	0.03	0.00869565	0
Georgia	GEO	2018-07-01	0	0.03	2.79	2.76			0.32			3.11	0.897106	0.03	0.0096463	0
Georgia	GEO	2018-10-01	0	0.03	1.87	1.84			0.8			2.67	0.700375	0.03	0.011236	0
Georgia	GEO	2019-01-01	0	0.03	1.68	1.65			1.25			2.93	0.573379	0.03	0.0102389	0
Georgia	GEO	2019-04-01	0	0.03	3.16	3.13			0.17			3.33	0.948949	0.03	0.00900901	0
Georgia	GEO	2019-07-01	0	0.03	2.55	2.52			0.35			2.9	0.87931	0.03	0.0103448	0
Georgia	GEO	2019-10-01	0	0.03	1.66	1.63			1.07			2.73	0.608059	0.03	0.010989	0
Georgia	GEO	2020-01-01	0	0.03	1.66	1.63			1.1			2.76	0.601449	0.03	0.0108696	0
Georgia	GEO	2020-04-01	0	0.03	2.77	2.74			0.16			2.93	0.945392	0.03	0.0102389	0
Georgia	GEO	2020-07-01	0	0.03	2.46	2.43			0.37			2.83	0.869258	0.03	0.0106007	0
Georgia	GEO	2020-10-01	0	0.03	1.47	1.44			1.19			2.66	0.552632	0.03	0.0112782	0
Georgia	GEO	2021-01-01	0	0.03	1.32	1.29			0.85			2.17	0.608295	0.03	0.0138249	0
Georgia	GEO	2021-04-01	0	0.03	3.3	3.27			0.07			3.37	0.979228	0.03	0.00890208	0
Georgia	GEO	2021-07-01	0	0.03	3.23	3.2			0.32			3.55	0.909859	0.03	0.0084507	0
Georgia	GEO	2021-10-01	0	0.03	2.45	2.42			1.14			3.59	0.682451	0.03	0.00835655	0
Georgia	GEO	2022-01-01	0	0.03	1.55	1.52			1.45			3	0.516667	0.03	0.01	0
Georgia	GEO	2022-04-01	0	0.03	4.04	4.01			0.04			4.08	0.990196	0.03	0.00735294	0
Georgia	GEO	2022-07-01	0	0.03	3.35	3.32			0.56			3.91	0.856777	0.03	0.00767263	0
Georgia	GEO	2022-10-01	0	0.03	1.95	1.92			1.34			3.29	0.592705	0.03	0.00911854	0
Georgia	GEO	2023-01-01	0	0.03	1.54	1.51			1.58			3.12	0.49359	0.03	0.00961538	0
Georgia	GEO	2023-04-01	0	0.03	3.85	3.82			0.1			3.95	0.974684	0.03	0.00759494	0
Georgia	GEO	2023-07-01	0	0.03	3.53	3.5			0.59			4.12	0.856796	0.03	0.00728155	0
Georgia	GEO	2023-10-01	0	0.03	2.05	2.02			1.17			3.22	0.636646	0.03	0.00931677	0
Georgia	GEO	2024-01-01	0	0.03	2.17	2.14			1.17			3.34	0.649701	0.03	0.00898204	0
Georgia	GEO	2024-04-01	0	0.03	3.94	3.91			0.07			4.01	0.982544	0.03	0.0074813	0
Georgia	GEO	2024-07-01	0	0.03	3.45	3.42			0.58			4.03	0.856079	0.03	0.00744417	0
Georgia	GEO	2024-10-01	0	0.03	1.89	1.86			1			2.89	0.653979	0.03	0.0103806	0
Georgia	GEO	2025-01-01	0	0.03	1.85	1.82			0.96			2.81	0.658363	0.03	0.0106762	0
Georgia	GEO	2025-04-01	0	0.03	3.82	3.79			0.01			3.83	0.997389	0.03	0.0078329	0
Georgia	GEO	2025-07-01	0	0.03	3.09	3.06			0.67			3.76	0.821809	0.03	0.00797872	0
Georgia	GEO	2025-10-01	0	0.02	2.32	2.3			1.12			3.44	0.674419	0.02	0.00581395	-33.3333
Georgia	GEO	2026-01-01	0	0.03	1.99	1.96			1.02			3.01	0.66113	0.03	0.00996678	0
Germany	DEU	2015-01-01	5.12	22.4	42.99	3.7	10.99	69.21	16.71	24.38	0.78	157.39	0.273143	27.52	0.174852
Germany	DEU	2015-04-01	14.31	15.11	47.03	5.76	11.25	52.77	9.54	21.4	0.6	133.88	0.351285	29.42	0.219749
Germany	DEU	2015-07-01	13.69	15.56	46.53	5.03	11.46	60.68	10.95	19.53	0.79	141.82	0.328092	29.25	0.206247
Germany	DEU	2015-10-01	4.22	26.15	47.12	4.13	11.5	67.74	20.88	21.89	1.12	163.48	0.288231	30.37	0.185772
Germany	DEU	2016-01-01	4.66	26.1	47.12	4.07	11.38	65.79	18.34	22.75	0.91	158.54	0.297212	30.76	0.19402	11.7733
Germany	DEU	2016-04-01	14.36	15.96	48.63	6.15	11.42	54.71	11.16	15.94	0.74	134.11	0.362613	30.32	0.226083	3.05914
Germany	DEU	2016-07-01	14.17	14.11	47.1	6.43	11.58	53.48	17.21	19.97	0.81	141.78	0.332205	28.28	0.199464	-3.31624
Germany	DEU	2016-10-01	3.63	23.92	43.52	3.44	11.6	66.76	27.62	21.56	0.93	164.07	0.265253	27.55	0.167916	-9.28548
Germany	DEU	2017-01-01	5.82	28.11	49.97	3.35	11.67	65.86	26.19	15.13	1.02	162.12	0.308228	33.93	0.209289	10.3056
Germany	DEU	2017-04-01	15.22	21.63	54.74	5.49	11.49	50.87	16.19	16.82	0.91	142.98	0.382851	36.85	0.257728	21.5369
Germany	DEU	2017-07-01	13.32	17.9	49.49	6.24	11.28	49.82	15.72	18.93	0.75	137.58	0.359718	31.22	0.226923	10.396
Germany	DEU	2017-10-01	3.63	38.93	59.94	4.7	11.93	54.36	21.27	21.63	0.75	160.85	0.372645	42.56	0.264594	54.4828
Germany	DEU	2018-01-01	5.6	34.01	57.09	4.8	11.79	58.09	23.14	19.03	0.89	161.39	0.353739	39.61	0.24543	16.7403
Germany	DEU	2018-04-01	16.98	22.45	56.65	4.83	11.51	46.73	11.93	15.91	0.88	135.19	0.41904	39.43	0.291664	7.00136
Germany	DEU	2018-07-01	16.22	19.07	51.09	3.47	11.4	52.87	16.39	18.52	0.93	143.06	0.357123	35.29	0.24668	13.0365
Germany	DEU	2018-10-01	4.66	36.05	56.84	3.21	12.02	52.54	23.52	19.04	0.9	156.03	0.364289	40.71	0.260911	-4.3468
Germany	DEU	2019-01-01	6.3	41.56	65.07	5.15	10.77	46.44	21.57	19.71	1.29	158.14	0.411471	47.86	0.302643	20.8281
Germany	DEU	2019-04-01	17.54	23.7	58.2	5.54	10.37	35.98	16.64	14.87	1.05	130.98	0.444343	41.24	0.314857	4.59041
Germany	DEU	2019-07-01	15.86	21.52	53.25	4.75	10.08	33.55	22.47	16.7	1.04	131.21	0.405838	37.38	0.284887	5.92236
Germany	DEU	2019-10-01	4.62	36.75	58.07	4.5	10.79	41.22	24.31	19.73	1.41	148.94	0.389889	41.37	0.277763	1.62122
Germany	DEU	2020-01-01	7.3	50.25	74.95	4.99	11.07	31.01	28.67	16.38	1.34	156.24	0.479711	57.55	0.368344	20.2466
Germany	DEU	2020-04-01	19.41	22.65	58.27	4.63	10.53	19.99	21.43	13.67	1.05	117.95	0.494023	42.06	0.356592	1.98836
Germany	DEU	2020-07-01	17.26	20.05	53.07	4.63	10.09	30.34	17.46	15.11	1.04	121.14	0.438088	37.31	0.307991	-0.187266
Germany	DEU	2020-10-01	4.57	36.67	58.03	4.31	11.09	41.88	24.17	15.76	1.39	145.18	0.399711	41.24	0.284061	-0.314237
Germany	DEU	2021-01-01	7.11	33.83	57.67	4.53	10.76	39.28	27.7	16.82	1.44	146.57	0.393464	40.94	0.27932	-28.8619
Germany	DEU	2021-04-01	19.65	23.71	59.98	5.34	10.21	29.48	20.24	15.28	1.07	130.22	0.460605	43.36	0.332975	3.09082
Germany	DEU	2021-07-01	17.37	19.6	53.49	5.82	9.75	36.24	16.27	16.75	0.95	128.01	0.417858	36.97	0.288806	-0.911284
Germany	DEU	2021-10-01	5.34	35.33	56.52	3.77	10.8	46.36	23.05	16.56	1.28	147.89	0.382176	40.67	0.275002	-1.38215
Germany	DEU	2022-01-01	9.8	43.66	70.82	4.45	11.41	43.92	23.84	8.55	1.5	152.75	0.463633	53.46	0.349984	30.5813
Germany	DEU	2022-04-01	22.68	24.27	63.73	4.93	10.84	36.91	17.32	7.27	1.01	130.46	0.488502	46.95	0.35988	8.27952
Germany	DEU	2022-07-01	20.9	19.53	55.44	3.77	10.35	41.98	15.42	8.75	0.89	126.59	0.437949	40.43	0.319378	9.35894
Germany	DEU	2022-10-01	6.43	35.02	58.29	4.33	11.33	43.2	19.87	8.2	1.18	134.5	0.433383	41.45	0.308178	1.91788
Germany	DEU	2023-01-01	8.12	41.93	66.54	4.39	10.78	41.01	21.25	5.85	1.32	139.76	0.476102	50.05	0.358114	-6.3786
Germany	DEU	2023-04-01	24.34	23.18	64.28	5.42	10.31	24.6	15.34	0.97	1.03	110.04	0.584151	47.52	0.431843	1.21406
Germany	DEU	2023-07-01	22.98	22.59	60.88	4.49	9.93	23.09	14.17	0	0.89	102.98	0.591183	45.57	0.442513	12.7133
Germany	DEU	2023-10-01	6.65	47.48	71.09	5	10.78	32.76	18.68	0	1.18	127.27	0.558576	54.13	0.425316	30.5911
Germany	DEU	2024-01-01	10.49	46.75	75.1	5.88	10.7	27.47	22.35	0	1.28	130.09	0.577293	57.24	0.440003	14.3656
Germany	DEU	2024-04-01	26.33	26.33	69.69	5.96	10.11	18.13	15.52	0	0.96	108.08	0.6448	52.66	0.487232	10.8165
Germany	DEU	2024-07-01	26.91	24.29	67.36	5.42	9.72	20.75	13.69	0	1.02	106.49	0.632548	51.2	0.480796	12.3546
Germany	DEU	2024-10-01	8.25	38.87	63.95	5.04	10.66	30.72	22.66	0	1.13	122.02	0.524094	47.12	0.386166	-12.9503
Germany	DEU	2025-01-01	14.62	33.14	63.46	4.08	10.57	31.53	26.44	0	1.05	126.01	0.503611	47.76	0.379018	-16.5618
Germany	DEU	2025-04-01	33.95	26.78	76.06	4.61	9.89	17.5	14.25	0	0.83	111.99	0.679168	60.73	0.542281	15.3247
Germany	DEU	2025-07-01	28.84	26.63	71.42	5.53	9.54	19.68	14.27	0	0.88	109.34	0.653192	55.47	0.507317	8.33984
Germany	DEU	2025-10-01	10.06	44.12	69.46	3.81	10.64	25.18	23.52	0	0.83	123.24	0.563616	54.18	0.43963	14.983
Germany	DEU	2026-01-01	15.55	42.05	72.28	3.34	10.49	30.1	26.12	0	0.85	133.39	0.54187	57.6	0.431816	20.603
Germany	DEU	2026-04-01	11.82	9.45	26.29	1.25	3.48	6.28	4.38	0	0.29	38.5	0.682857	21.27	0.552468	-64.9761
Greece	GRC	2015-01-01	0.63	0.96	3.15	1.56		4.73	1.8			9.68	0.325413	1.59	0.164256
Greece	GRC	2015-04-01	1.13	0.73	2.88	1.02		4.35	0.97			8.2	0.35122	1.86	0.226829
Greece	GRC	2015-07-01	1.15	0.91	3.2	1.14		5.98	2.44			11.62	0.275387	2.06	0.177281
Greece	GRC	2015-10-01	0.69	0.95	2.4	0.76		4.63	3.2			10.23	0.234604	1.64	0.160313
Greece	GRC	2016-01-01	0.69	1.05	2.78	1.04		3.93	2.76			9.47	0.293559	1.74	0.183738	9.43396
Greece	GRC	2016-04-01	1.12	0.72	2.89	1.05		2.69	3.1			8.68	0.332949	1.84	0.211982	-1.07527
Greece	GRC	2016-07-01	1.15	0.97	3.17	1.05		4.11	3.68			10.96	0.289234	2.12	0.193431	2.91262
Greece	GRC	2016-10-01	0.64	1	2.72	1.08		4.45	4.16			11.33	0.240071	1.64	0.144748	2.22045e-14
Greece	GRC	2017-01-01	0.67	1.07	2.74	1		4.7	4.26			11.7	0.234188	1.74	0.148718	0
Greece	GRC	2017-04-01	1.11	0.76	2.45	0.58		3.51	3.47			9.43	0.259809	1.87	0.198303	1.63043
Greece	GRC	2017-07-01	1.22	1.06	3.14	0.86		4.13	4.66			11.93	0.263202	2.28	0.191115	7.54717
Greece	GRC	2017-10-01	0.65	1.31	2.58	0.62		4.45	4.21			11.24	0.229537	1.96	0.174377	19.5122
Greece	GRC	2018-01-01	0.66	1.36	3.51	1.49		3.84	3.36			10.71	0.327731	2.02	0.188609	16.092
Greece	GRC	2018-04-01	1.06	0.96	3.16	1.14		3.14	3.09			9.39	0.336528	2.02	0.215122	8.02139
Greece	GRC	2018-07-01	1.11	1.16	3.31	1.04		4.3	4.12			11.73	0.282182	2.27	0.193521	-0.438596
Greece	GRC	2018-10-01	0.6	1.38	2.69	0.71		3.94	4.64			11.27	0.238687	1.98	0.175688	1.02041
Greece	GRC	2019-01-01	0.74	1.7	3.2	0.76		3.33	4.56			11.09	0.288548	2.44	0.220018	20.7921
Greece	GRC	2019-04-01	1.06	1.14	2.85	0.65		2.55	3.54			8.94	0.318792	2.2	0.246085	8.91089
Greece	GRC	2019-07-01	1.19	1.54	3.63	0.9		2.3	5.34			11.27	0.322094	2.73	0.242236	20.2643
Greece	GRC	2019-10-01	0.62	1.42	2.65	0.61		2.49	3.86			9	0.294444	2.04	0.226667	3.0303
Greece	GRC	2020-01-01	0.81	1.84	3.11	0.46		2.29	4.27			9.67	0.321613	2.65	0.274043	8.60656
Greece	GRC	2020-04-01	1.19	1.4	3.25	0.66		0.77	4			8.02	0.405237	2.59	0.322943	17.7273
Greece	GRC	2020-07-01	1.27	2	4.1	0.83		0.97	5.8			10.87	0.377185	3.27	0.300828	19.7802
Greece	GRC	2020-10-01	0.7	2.2	3.39	0.49		1.81	4.86			10.06	0.336978	2.9	0.28827	42.1569
Greece	GRC	2021-01-01	0.88	2.56	5.09	1.65		1.76	4.09			10.94	0.465265	3.44	0.314442	29.8113
Greece	GRC	2021-04-01	1.37	1.47	3.59	0.75		1.05	5.07			9.71	0.369722	2.84	0.292482	9.65251
Greece	GRC	2021-07-01	1.4	2.04	4.47	1.03		1.48	6.93			12.88	0.34705	3.44	0.267081	5.19878
Greece	GRC	2021-10-01	0.75	2.93	4.8	1.12		1.15	5.89			11.84	0.405405	3.68	0.310811	26.8966
Greece	GRC	2022-01-01	1.07	2.52	4.68	1.09		1.63	5.39			11.7	0.4	3.59	0.306838	4.36047
Greece	GRC	2022-04-01	1.7	1.99	4.43	0.74		0.89	3.9			9.22	0.480477	3.69	0.400217	29.9296
Greece	GRC	2022-07-01	1.82	2.28	5.07	0.97		1.96	5.94			12.97	0.390902	4.1	0.316114	19.186
Greece	GRC	2022-10-01	1.06	2.6	4.24	0.58		1.12	3.82			9.18	0.461874	3.66	0.398693	-0.543478
Greece	GRC	2023-01-01	1.33	2.45	4.49	0.71		1.47	3.02			8.98	0.5	3.78	0.420935	5.29248
Greece	GRC	2023-04-01	1.95	1.82	4.35	0.58		0.69	3.61			8.65	0.50289	3.77	0.435838	2.16802
Greece	GRC	2023-07-01	2.86	2.54	6.45	1.05		1.17	5.26			12.88	0.500776	5.4	0.419255	31.7073
Greece	GRC	2023-10-01	1.76	2.62	5.43	1.05		1.23	3.67			10.33	0.525653	4.38	0.424008	19.6721
Greece	GRC	2024-01-01	1.94	3.01	5.67	0.72		1.05	4.11			10.83	0.523546	4.95	0.457064	30.9524
Greece	GRC	2024-04-01	3.14	2.4	6.23	0.69		0.45	4.94			11.62	0.536145	5.54	0.476764	46.9496
Greece	GRC	2024-07-01	3.82	2.35	7.04	0.87		0.84	6.29			14.17	0.496824	6.17	0.435427	14.2593
Greece	GRC	2024-10-01	2.38	3.2	5.95	0.37		0.92	5.75			12.62	0.471474	5.58	0.442155	27.3973
Greece	GRC	2025-01-01	2.43	2.66	5.6	0.51		1.13	6.08			12.81	0.437158	5.09	0.397346	2.82828
Greece	GRC	2025-04-01	3.77	2.14	6.44	0.53		0.29	4.08			10.81	0.595745	5.91	0.546716	6.6787
Greece	GRC	2025-07-01	4.74	2.82	8.32	0.76		0.5	5.78			14.6	0.569863	7.56	0.517808	22.5284
Greece	GRC	2025-10-01	2	2.7	5.39	0.69		0.81	6.01			12.21	0.441441	4.7	0.38493	-15.7706
Greece	GRC	2026-01-01	2.25	3.78	8.18	2.15		0.88	5.84			14.9	0.548993	6.03	0.404698	18.4676
Greece	GRC	2026-04-01	1.02	0.8	2.07	0.25		0.2	1.29			3.56	0.581461	1.82	0.511236	-69.2047
Hungary	HUN	2015-01-01		0.23	0.51	0.06	0.19	1.58	1.12	4.16	0.03	7.63	0.0668414	0.23	0.0301442
Hungary	HUN	2015-04-01		0.19	0.48	0.06	0.2	1.25	0.53	3.37	0.03	5.85	0.0820513	0.19	0.0324786
Hungary	HUN	2015-07-01		0.14	0.38	0.03	0.18	1.51	1.18	3.51	0.03	6.78	0.0560472	0.14	0.020649
Hungary	HUN	2015-10-01		0.12	0.41	0.04	0.22	1.64	1.43	3.86	0.03	7.6	0.0539474	0.12	0.0157895
Hungary	HUN	2016-01-01		0.2	0.48	0.03	0.22	1.38	1.52	4.18	0.03	7.79	0.0616175	0.2	0.0256739	-13.0435
Hungary	HUN	2016-04-01		0.16	0.47	0.08	0.2	1.1	0.99	3.77	0.03	6.54	0.0718654	0.16	0.0244648	-15.7895
Hungary	HUN	2016-07-01		0.11	0.37	0.05	0.18	1.51	1.39	3.78	0.03	7.26	0.0509642	0.11	0.0151515	-21.4286
Hungary	HUN	2016-10-01		0.2	0.52	0.06	0.23	1.51	1.56	3.4	0.03	7.26	0.0716253	0.2	0.0275482	66.6667
Hungary	HUN	2017-01-01	0.05	0.18	0.52	0.03	0.23	1.32	1.77	3.75	0.03	7.7	0.0675325	0.23	0.0298701	15
Hungary	HUN	2017-04-01	0.11	0.2	0.63	0.06	0.23	0.72	1.31	4.1	0.03	6.98	0.0902579	0.31	0.0444126	93.75
Hungary	HUN	2017-07-01	0.13	0.15	0.56	0.05	0.2	1.38	1.67	3.44	0.03	7.27	0.0770289	0.28	0.0385144	154.545
Hungary	HUN	2017-10-01	0.06	0.2	0.58	0.05	0.24	1.43	2.12	3.86	0.03	8.21	0.0706456	0.26	0.0316687	30
Hungary	HUN	2018-01-01	0.07	0.16	0.52	0.04	0.22	1.18	1.83	3.69	0.03	7.51	0.069241	0.23	0.0306258	2.22045e-14
Hungary	HUN	2018-04-01	0.2	0.15	0.65	0.05	0.22	0.91	1.01	3.45	0.03	6.21	0.10467	0.35	0.0563607	12.9032
Hungary	HUN	2018-07-01	0.24	0.11	0.62	0.04	0.2	1.39	1.39	3.93	0.03	7.53	0.0823373	0.35	0.0464807	25
Hungary	HUN	2018-10-01	0.12	0.18	0.62	0.03	0.26	1.3	2.01	3.72	0.03	7.83	0.0791826	0.3	0.0383142	15.3846
Hungary	HUN	2019-01-01	0.22	0.22	0.77	0.06	0.24	1.14	1.99	3.53	0.03	7.64	0.100785	0.44	0.0575916	91.3043
Hungary	HUN	2019-04-01	0.43	0.18	0.92	0.05	0.23	0.83	1.26	3.77	0.03	7.03	0.130868	0.61	0.086771	74.2857
Hungary	HUN	2019-07-01	0.53	0.1	0.92	0.04	0.22	1.09	1.94	3.83	0.03	7.99	0.115144	0.63	0.0788486	80
Hungary	HUN	2019-10-01	0.25	0.2	0.81	0.05	0.28	0.98	2.36	4.22	0.03	8.56	0.0946262	0.45	0.0525701	50
Hungary	HUN	2020-01-01	0.39	0.21	0.94	0.05	0.26	0.96	2.38	3.82	0.03	8.3	0.113253	0.6	0.0722892	36.3636
Hungary	HUN	2020-04-01	0.84	0.17	1.36	0.06	0.26	0.66	1.33	3.77	0.03	7.3	0.186301	1.01	0.138356	65.5738
Hungary	HUN	2020-07-01	0.91	0.1	1.32	0.05	0.23	1.04	1.94	3.65	0.03	8.08	0.163366	1.01	0.125	60.3175
Hungary	HUN	2020-10-01	0.29	0.15	0.8	0.06	0.27	1.1	2.36	3.9	0.03	8.35	0.0958084	0.44	0.0526946	-2.22222
Hungary	HUN	2021-01-01	0.61	0.18	1.11	0.02	0.27	0.69	2.35	4.14	0.03	8.49	0.130742	0.79	0.0930506	31.6667
Hungary	HUN	2021-04-01	1.29	0.18	1.85	0.05	0.3	0.73	1.76	3.82	0.03	8.33	0.222089	1.47	0.176471	45.5446
Hungary	HUN	2021-07-01	1.37	0.1	1.83	0.06	0.27	0.83	1.81	3.69	0.03	8.34	0.219424	1.47	0.176259	45.5446
Hungary	HUN	2021-10-01	0.63	0.18	1.17	0.05	0.28	0.78	2.69	3.44	0.03	8.3	0.140964	0.81	0.0975904	84.0909
Hungary	HUN	2022-01-01	0.91	0.22	1.49	0.04	0.29	0.71	2.55	3.81	0.03	8.76	0.170091	1.13	0.128995	43.038
Hungary	HUN	2022-04-01	1.62	0.14	2.12	0.04	0.29	0.71	1.4	3.98	0.03	8.38	0.252983	1.76	0.210024	19.7279
Hungary	HUN	2022-07-01	1.59	0.12	2.02	0.03	0.25	0.71	1.76	3.35	0.03	8.03	0.251557	1.71	0.212951	16.3265
Hungary	HUN	2022-10-01	0.63	0.11	1.13	0.05	0.31	0.79	2.13	3.78	0.03	8	0.14125	0.74	0.0925	-8.64198
Hungary	HUN	2023-01-01	1.01	0.19	1.49	0.03	0.23	0.74	1.93	3.86	0.03	8.17	0.182375	1.2	0.146879	6.19469
Hungary	HUN	2023-04-01	2.16	0.14	2.59	0.08	0.19	0.67	1.23	3.38	0.02	8.02	0.322943	2.3	0.286783	30.6818
Hungary	HUN	2023-07-01	2.48	0.09	2.72	0.05	0.1	0.62	1.55	4.02	0	9.08	0.299559	2.57	0.28304	50.2924
Hungary	HUN	2023-10-01	1.05	0.19	1.51	0.04	0.23	0.68	1.83	3.77	0	7.95	0.189937	1.24	0.155975	67.5676
Hungary	HUN	2024-01-01	1.52	0.23	2.06	0.04	0.25	0.67	1.82	3.59	0.02	8.32	0.247596	1.75	0.210337	45.8333
Hungary	HUN	2024-04-01	3.13	0.14	3.56	0.07	0.19	0.66	1.1	3.71	0.03	9.17	0.388222	3.27	0.356598	42.1739
Hungary	HUN	2024-07-01	3.16	0.12	3.51	0.04	0.16	0.63	1.26	3.72	0.03	9.25	0.379459	3.28	0.354595	27.6265
Hungary	HUN	2024-10-01	1.36	0.16	1.95	0.06	0.33	0.67	2.23	4.13	0.04	9.14	0.213348	1.52	0.166302	22.5806
Hungary	HUN	2025-01-01	1.8	0.16	2.45	0.06	0.4	0.47	2.45	3.87	0.03	9.39	0.260916	1.96	0.208733	12
Hungary	HUN	2025-04-01	3.92	0.14	4.52	0.07	0.36	0.36	0.95	3.87	0.03	9.85	0.458883	4.06	0.412183	24.159
Hungary	HUN	2025-07-01	3.82	0.12	4.31	0.03	0.31	0.36	1.22	3.68	0.03	9.7	0.44433	3.94	0.406186	20.122
Hungary	HUN	2025-10-01	1.41	0.14	2.05	0.05	0.42	0.38	2.81	3.81	0.03	9.18	0.223312	1.55	0.168845	1.97368
Hungary	HUN	2026-01-01	1.44	0.15	2.03	0.06	0.35	0.39	2.65	3.84	0.03	9.07	0.223815	1.59	0.175303	-18.8776
Hungary	HUN	2026-04-01	1.02	0.05	1.23	0.02	0.13	0.1	0.28	1.38	0.01	3.05	0.403279	1.07	0.35082	-73.6453
India	IND	2019-01-01	11.47	8.91	51.8	24.47	6.84	255.87	10.89	9.36	0.11	327.95	0.157951	20.38	0.0621436
India	IND	2019-04-01	12.42	19.09	75.71	41.27	2.82	274.69	12.99	11.12	0.11	374.54	0.202141	31.51	0.0841299
India	IND	2019-07-01	11.21	26.52	99.03	59.77	1.44	234.63	12.49	12.9	0.09	359.08	0.275788	37.73	0.105074
India	IND	2019-10-01	12.45	8.78	61.22	36.24	3.66	233.35	11.61	11.78	0.09	317.99	0.192522	21.23	0.0667631
India	IND	2020-01-01	16.26	10.24	60.38	27.86	5.93	251.52	11.36	10.66	0.09	333.95	0.180806	26.5	0.0793532	30.0294
[truncated: 2,227 more rows]

## Sheet: 09_Results_AggregateStock
Results AggregateStock
[truncated: 14 more rows]

## Sheet: 10_Results_AggregateAdditions
Results AggregateAdditions
[truncated: 14 more rows]

[truncated: 23 more sheets: 11_Results_Decomposition_G, 11_archive_StockWtd_Decomp, 12_Results_Placebo_Loose, 12b_Results_Placebo_Strict, 13_Results_LeaveOut_fixed2014, 14_Results_Subgroups, 15_Results_Quartiles, 16_Results_IHS, 17_Results_WindowSens, 18_Results_QtrGenValidation, 19_Results_SVAR_IRFs, 20_ConsistencyCheck, 21_CountryClassifications, 22_CodeInventory, 23_SupplyChain_Concentration, 24_Placebo_HorizonSpec, 25_LeaveOut_ShockSpec, 28_IncomeClass_FY26, 29_StructuralPanel, 30_Table3_Coefficients …]
