# Supplementary material
Source: Research Square preprint supplement (doi:10.21203/rs.3.rs-10181530/v1)
Supplement: Supplementary file 1 [file eb024e61944e63815657b9cd.docx]

**SUPPLEMENTARY INFORMATION**

**Whose Energy Transition?**

Global renewable-capacity resilience masks country-level divergence after shocks

**Saumitra Saxena and Bassam Dally**

*Clean Energy Research Platform, Physical Science and Engineering Division (PSE),*

*King Abdullah University of Science and Technology, Thuwal 23955-6900, Saudi Arabia*

*Corresponding author: saumitra.saxena@kaust.edu.sa*

*This file accompanies the main article (Saxena & Dally, 2026) and is structured per Nature Energy supplementary information conventions: numbered Supplementary Notes, Supplementary Figures, Supplementary Tables and Supplementary References.*

# Contents

**Supplementary Note 1** The 2026 Iran-war episode: structural context and observational indicators

**Supplementary Note 2** Data sources and provenance

**Supplementary Note 3** Data-processing pipeline

**Supplementary Note 4** Event-study procedure

**Supplementary Note 5** Distributional measures and the G-based decomposition

**Supplementary Note 6** Placebo benchmark

**Supplementary Note 7** Inverse-hyperbolic-sine specification

**Supplementary Note 8** Sign-restricted SVAR rotation exercise

**Supplementary Note 9** Subgroup heterogeneity tests

**Supplementary Note 10** Shock-specific leave-out test

**Supplementary Note 11** Related-literature compilation

**Supplementary Note 12** Household electrification and energy-affordability markers

**Supplementary Note 13** Exploratory country-level correlates and robustness

**Supplementary Note 14** Reproducibility

**Supplementary Tables** Tables 1–6

**Supplementary Figures** Figures 1–3

**Supplementary References** Referenced primary sources

# Supplementary Note 1 | The 2026 Iran-war episode: structural context and observational indicators

This note records contemporary context for the 2026 Iran-war episode. The main event-study panel ends in 2024, so none of the observations below is treated as an estimated response or as evidence extending the historical results.

## Structural context

Monthly Brent averaged approximately US$103 per barrel in March 2026 and US$117 in April 2026 in the FRED series23. The IEA’s March Oil Market Report projected an approximately 8 million barrel-per-day disruption; its April issue subsequently estimated a 10.1 million barrel-per-day March supply fall13. IEA member countries agreed on 11 March to make 400 million barrels of emergency stocks available14. UN Trade and Development documented a near halt in Strait of Hormuz shipping and heightened risks for energy, fertiliser and vulnerable importing economies16. These indicators establish the scale of the disruption; they do not measure a renewable-capacity response.

## Macroeconomic transmission

In the IMF’s April 2026 reference scenario, global growth was projected at 3.1% and global headline inflation at 4.4%15. These forecasts are scenario-dependent and should not be used to infer that clean-energy availability caused any difference from earlier oil shocks. The present paper makes no causal comparison between the 2026 episode and the 1970s.

## Observational early-2026 demand indicators

Ember reported unusually strong cleantech trade indicators in March 2026, including a doubling of Chinese solar PV exports from February, record monthly solar imports in 50 countries and a 141% year-on-year rise in India’s imports17. Octopus Energy reported increases of more than half in UK solar and heat-pump sales28. These are contemporaneous trade and company indicators, not annual installed-capacity outcomes. Country-level post-shock deviations can be assessed only after consistent 2026 and later IRENA releases become available.

# Supplementary Note 2 | Data sources and provenance

The main analysis uses five core data families: Brent oil prices, the Caldara–Iacoviello geopolitical-risk index, IRENA renewable capacity, Ember electricity generation and World Bank oil rents. The World Bank Pink Sheet29 supplies copper prices for the supplementary SVAR. The repository also archives auxiliary global-capacity and UN-voting inputs30 that are not used in the reported headline results. All sources and their roles are identified in Supplementary Table 1.

## Supplementary Table 1 | Primary data sources

| **Source** | **Variable** | **Period** | **Licence** | **URL** | **File** |
| --- | --- | --- | --- | --- | --- |
| U.S. EIA via FRED | Brent crude monthly | 1987–2026 | Public | fred.stlouisfed.org/series/MCOILBRENTEU | MCOILBRENTEU.csv |
| Caldara–Iacoviello | GPR monthly | 1900–2026 | Public | matteoiacoviello.com/gpr.htm | data_gpr_export.xls |
| World Bank Pink Sheet | Commodity prices | 1960–2024 | Public | thedocs.worldbank.org/…/CMO-Historical-Data-Monthly.xlsx | CMO-Historical-Data-Monthly.xlsx |
| Ember MED | Country-month electricity | 1999–2026 | CC-BY-4.0 | ember-energy.org/data/monthly-electricity-data | monthly_full_release_long_format.csv |
| IRENA RES 2025 via OWID | Solar total capacity (country×year) | 2000–2024 | CC-BY-4.0 | ourworldindata.org/grapher/installed-solar-pv-capacity | installed-solar-pv-capacity.csv |
| IRENA RES 2025 via OWID | Wind capacity (country×year) | 2000–2024 | CC-BY-4.0 | ourworldindata.org/grapher/cumulative-installed-wind-energy-capacity-gigawatts | cumulative-installed-wind-energy-capacity-gigawatts.csv |
| IRENA RES 2025 via OWID | Global renewables by tech | 2000–2024 | CC-BY-4.0 | ourworldindata.org/grapher/installed-global-renewable-energy-capacity-by-technology | installed-global-renewable-energy-capacity-by-technology.csv |
| Harvard Dataverse | UN voting ideal points (auxiliary; not used in reported results) | 1946–2025 | Public | dataverse.harvard.edu doi:10.7910/DVN/LEJUQZ | Idealpointestimates1946-2025.csv |
| WB Changing Wealth via OWID | Oil rents % of GDP | 1970–2021 | CC-BY-4.0 | ourworldindata.org/grapher/oil-rents-as-a-share-of-gdp | oil-rents-as-a-share-of-gdp.csv |
| World Bank Country and Lending Groups | FY2026 income group and region | FY2026 | Public | datahelpdesk.worldbank.org/knowledgebase/articles/906519-world-bank-country-and-lending-groups | income_classification_fy26.csv |
| International Energy Agency | Household electrification and affordability markers | 2000, 2019, 2024 | Public | iea.org/reports/household-energy-affordability | published contextual values; no raw series used |

# Supplementary Note 3 | Data-processing pipeline

The archived pipeline reads nine raw files and produces five processed files in /01_data/processed/. Auxiliary files retained for provenance are distinguished below from inputs used in the reported results:

- monthly_panel.csv — 316 monthly observations (2000-01 to 2026-04) × 40 columns merging Brent, GPR (aggregate plus country decompositions), copper/nickel/iron-ore/aluminium and globally-aggregated solar+wind generation.
- country_year_capacity.csv — country×year Solar (total) + Wind (total) installed-capacity panel: 222 ISO-coded entities and 4,269 non-missing country-year observations (2000–2024). The 222×25 product equals 5,550, so the panel is unbalanced; rows with missing or zero stock are dropped before event-study fitting.
- country_quarter.csv — full Ember country×quarter solar+wind generation panel.
- alignment_scores.csv — archived UN-voting ideal-point scores; retained as an auxiliary provenance file but not used in the reported v3.5 results.
- oil_rents.csv — World Bank Oil rents (% of GDP) by country×year.

# Supplementary Note 4 | Event-study procedure

For each shock year T ∈ {2008, 2014, 2020, 2022} and country c with at least 50 MW of solar plus wind capacity at T−1, we fit a log-linear trend to the available non-zero observations in the four-year window T−4,…,T−1, requiring at least three observations, and project the trend to h ∈ {0,1,2}. The percentage gap is:

gapc,T+h = 100 × (Kc,T+h − K̂c,T+h) / K̂c,T+h

where K̂c,T+h = exp(α̂c + β̂c(T+h)) is the projected value from the country-specific fit. The use of available non-zero observations, rather than requiring exactly four observations, is necessary for three included country–shock cases.

## Pre-window completeness

All included country–shock cases use four pre-shock observations except Dominican Republic for the 2014 shock, and Hong Kong and Montenegro for the 2020 shock; each of these has three valid non-zero observations. Excluding these three cases does not change the rounded headline medians or aggregate conclusions. This implementation detail is now stated explicitly because it is required to reproduce the published values.

## Shock identification

Each named shock is treated as a common global episode rather than as a unit-level treatment. The dates are chosen from widely documented financial, oil-market, pandemic and geopolitical events. Because all countries are exposed and there is no untreated donor pool, the design is not a difference-in-differences or synthetic-control estimator31,32,21,22.

## The ≥50 MW filter

Countries below 50 MW of pre-shock solar plus wind capacity are excluded from the primary specification to avoid unstable percentage gaps from very small projected denominators. This creates an established-adopter sample. The IHS analysis in Supplementary Note 7 removes this threshold.

# Supplementary Note 5 | Distributional measures and the G-based decomposition

The true aggregate gap G_{T+h} is the deviation of the sum of observed capacities from the sum of projected capacities:

G_{T+h} = 100 × (Σ_c K_{c,T+h} − Σ_c K̂_{c,T+h}) / Σ_c K̂_{c,T+h}

This is the conventional aggregate deviation and equals the projected-capacity-weighted mean of country percentage gaps. Other weighted means, including pre-shock-stock weighting, are mathematically different and are not used as substitutes for G.

## Unweighted country mean and country median

The unweighted mean μT+h gives each country equal weight. The median mT+h is the 50th percentile of the country-gap distribution. Two-sided 95% percentile-bootstrap confidence intervals use 10,000 country-resampling draws with fixed random seed 20260618. The fixed seed resolves small endpoint differences that arose across earlier unfixed bootstrap runs.

## G-based decomposition

The difference between the aggregate and median can be written G − m = (G − μ) + (μ − m). The term G − μ describes the contribution of projected-capacity weighting, while μ − m describes distributional asymmetry. A positive G − μ means countries with greater projected capacity have, on average, less-negative gaps than the equal-country mean. The leave-out test, rather than this algebraic decomposition alone, is the primary evidence on which countries shape the aggregate.

G − m = (G − μ) + (μ − m)

↑ ↑

concentration skewness

The concentration component (G − μ) captures the contribution of size-weighting: it is positive when the largest pre-shock-capacity economies experienced more favourable conditions than the average country. The skewness component (μ − m) captures the contribution of distributional tails.

## Supplementary Table 2 | G-based decomposition at t+0

| **Shock** | **n** | **True agg G** | **Unweighted μ** | **Median m** | **G − μ (concentration)** | **μ − m (skewness)** |
| --- | --- | --- | --- | --- | --- | --- |
| 2008 GFC | 37 | −0.3% | −7.9% | −3.9% | **+7.6 pp** | −4.0 pp |
| 2014 oil crash | 70 | −12.4% | −4.7% | −11.2% | **−7.7 pp** | +6.5 pp |
| 2020 COVID | 116 | +0.4% | −6.0% | −3.4% | **+6.4 pp** | −2.6 pp |
| 2022 R–U | 124 | −8.0% | −1.3% | −1.5% | **−6.7 pp** | +0.2 pp |

# Supplementary Note 6 | Placebo benchmark

Because the short-window log-linear extrapolation produces non-zero deviations even in non-shock years, we benchmark each real-shock country median against an empirical placebo band. We report two specifications side by side:

## Strict 2-year buffer specification (n = 4)

Placebo years 2004, 2005, 2011, 2017. Defined as years at least two calendar years from any real shock. n = 4 placebo medians.

## Window-clean specification (n = 2)

Placebo years 2004, 2005. Defined as years whose full event-study window [T−4, T+2] does not overlap any of the four real shocks. n = 2 placebo medians.

## Horizon-specific bands

Both specifications are reported at all three horizons:

Strict 2-yr buffer (n=4): t+0 [−9.1%, −1.8%] t+1 [−17.0%, −0.5%] t+2 [−29.5%, −5.8%]

Window-clean (n=2): t+0 [−5.6%, −1.8%] t+1 [−11.5%, −0.5%] t+2 [−15.9%, −5.8%]

The systematically negative bands are consistent with the underlying technology-adoption curve decelerating relative to the fitted log-linear extrapolation. We use 'empirical placebo band' rather than '95% confidence interval' to reflect the small number of placebo observations.


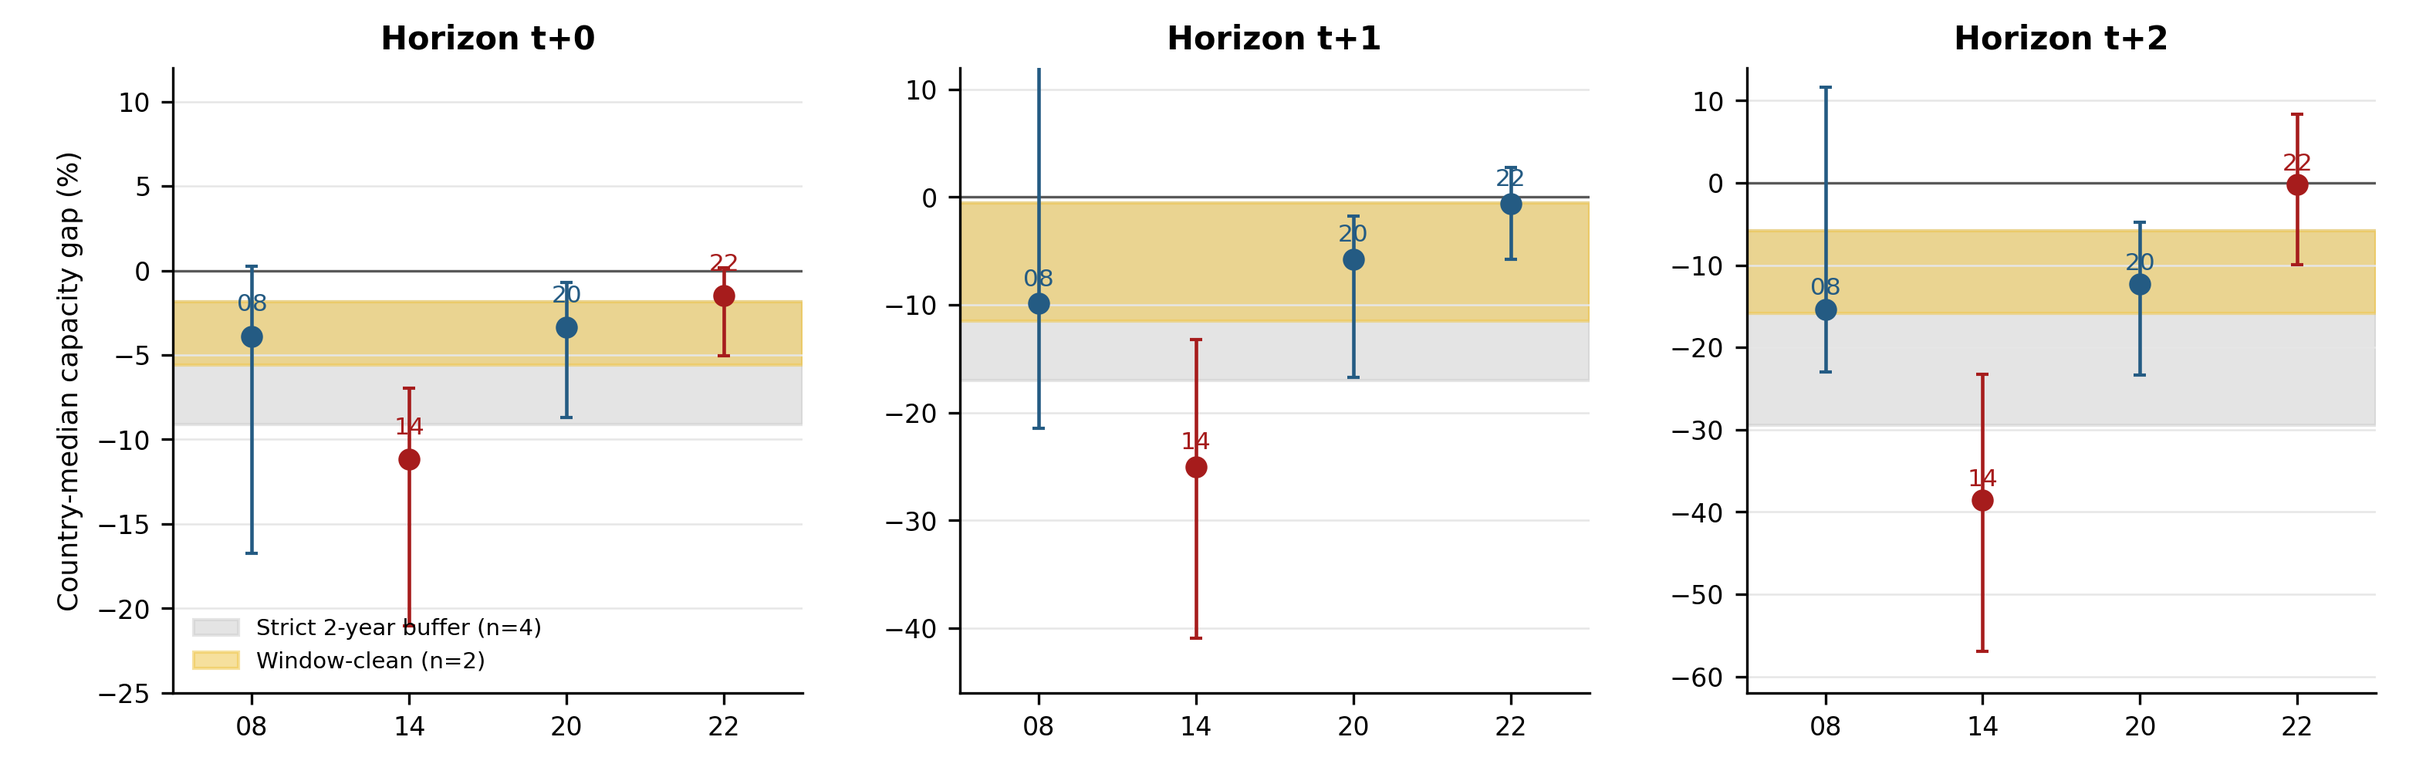


*Supplementary Fig. 1 | Placebo benchmark — horizon-specific bands and two placebo specifications, reproduction of main-article Fig. 2.*

# Supplementary Note 7 | Inverse-hyperbolic-sine specification

The IHS transformation IHS(x) = ln(x + √(x²+1)) is defined at zero and permits a broader sample. For each country with at least two non-zero pre-shock observations, we fit IHS(Kc,t) = αc + βct over the same four-year window, project forward, back-transform with K̂c,T+h = sinh(α̂c + β̂c(T+h)), and calculate the capacity gap using the same percentage formula. Because percentage gaps can still be unstable when the back-transformed projection is close to zero, the IHS analysis is interpreted as a sample-selection robustness check rather than as the preferred estimand.

## Supplementary Table 3 | IHS results

| **Year** | **Type** | **n** | **Median %** | **95% CI** | **Note** |
| --- | --- | --- | --- | --- | --- |
| 2008 GFC | **real** | 117 | **+1.6** | **[+0.0, +6.8]** | within placebo band |
| 2014 oil crash | **real** | 180 | **+1.7** | **[−0.4, +6.8]** | within placebo band |
| 2020 COVID | **real** | 215 | **0.0** | **[−1.9, +0.9]** | within placebo band |
| 2022 R–U | **real** | 218 | **0.0** | **[−1.0, +1.5]** | within placebo band |
| Placebo distribution |  | 8 yrs | mean +0.7 | range [−0.7, +3.8] | all four real shocks within band |

# Supplementary Note 8 | Sign-restricted SVAR rotation exercise

We report a sign-restricted vector autoregression as supplementary evidence. The four monthly variables are first differences of log Brent, log GPR, log copper and log global solar-plus-wind generation. The reported specification uses three monthly lags and the sample January 2001–December 2024 (287 monthly differences). A standard AIC calculation on this differenced sample selects one lag, not three; both specifications are therefore reported as a sensitivity check below.

## Supplementary Table 4 | Sign restrictions on the contemporaneous impact matrix

Sign restrictions identify four shocks (renewable response unrestricted for oil-supply, geopolitical and industrial-demand shocks; sign-restricted positive only for the renewable-tech shock):

| **Shock** | **Brent** | **GPR** | **Copper** | **Renewables** |
| --- | --- | --- | --- | --- |
| Oil-supply | **+** | unrestricted | **−** | unrestricted |
| Geopolitical | **+** | **+** | **−** | unrestricted |
| Industrial-demand | **+** | unrestricted | **+** | unrestricted |
| Renewable-tech | unrestricted | unrestricted | unrestricted | **+** |

Cells marked + or − are sign-restricted on impact; cells marked 'unrestricted' carry no restriction. The renewable-response column is sign-restricted only for the renewable-tech shock (positive), which means the renewable-tech shock has a built-in positive central response; the other three shocks leave the renewable response free.

## Algorithm and not-a-Bayesian-SVAR caveat

We use the Rubio-Ramírez–Waggoner–Zha rotation algorithm27. For the reported VAR(3), the procedure draws an orthonormal Q by QR decomposition of an N(0,1) matrix, forms A = P·Q from the reduced-form Cholesky factor P, explores admissible column permutations and sign normalisations, and retains rotations satisfying the impact restrictions. The archived run retains 5,000 sign-satisfying rotations. This is not a Bayesian SVAR: only rotation uncertainty around one reduced-form point estimate is sampled, not the posterior over coefficients and covariance matrices33. Narrative restrictions are not imposed34.

## Lag-order and independent numerical verification

Independent re-estimation reproduced the stored all-horizon VAR(3) impulse-response summaries with a maximum absolute difference of 0.0036 across medians and interval endpoints, consistent with Monte Carlo variation. Standard AIC values for lags 1–4 were −17.2417, −17.2278, −17.2043 and −17.1740, respectively. At h = 12, the VAR(1) 95% intervals were [−0.1167, 0.1095] for the oil-supply shock, [−0.1160, 0.1077] for the geopolitical shock, [−0.1189, 0.0971] for the industrial-demand shock and [−0.0106, 0.1192] for the renewable-technology shock. The corresponding VAR(3) intervals were [−0.1175, 0.1023], [−0.1166, 0.1006], [−0.1163, 0.0944] and [−0.0118, 0.1169]. Every interval includes zero, so the substantive conclusion is invariant to the lag choice.


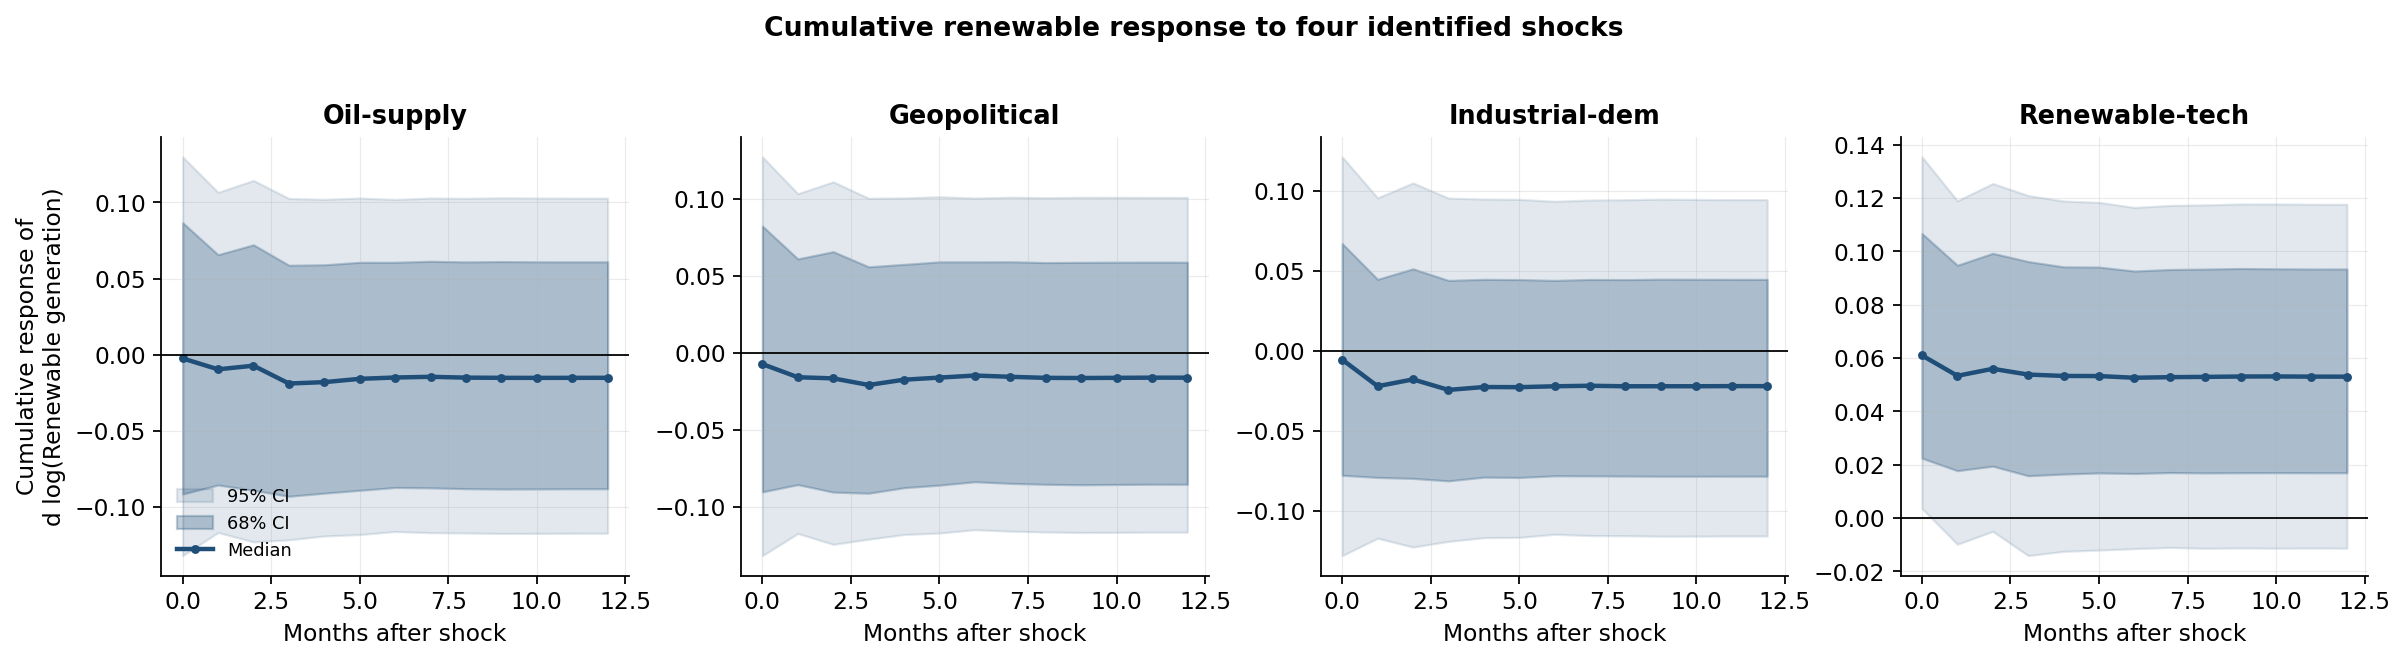


*Supplementary Fig. 2 | Sign-restricted SVAR rotation exercise: cumulative renewable-generation response to four identified structural shocks. Median across 5,000 retained sign-satisfying draws; 68% and 95% rotation-uncertainty intervals.*

Under a conventional 95% criterion, neither lag specification yields a statistically distinguishable short-run renewable-generation response to the oil-supply, geopolitical or industrial-demand shocks. The renewable-technology shock has a positive median response, but its 95% interval includes zero and its positive impact sign is imposed by construction. The SVAR is therefore diagnostic rather than primary evidence.

# Supplementary Note 9 | Subgroup heterogeneity tests

## Binary classification: net oil exporter vs net importer

The binary classification uses a time-invariant conventional list of 20 net oil exporters. For each shock, we compare exporter and importer gap distributions with a one-sided Mann–Whitney U test. Exporter samples contain only 4–14 countries, so the exercise is exploratory and sensitive to classification choices.

## Continuous classification: oil-rents quartile and Spearman correlation

Continuous heterogeneity is operationalised by the country mean of the World Bank NY.GDP.PETR.RT.ZS (oil rents % of GDP) averaged over the five pre-shock years (T−5 to T−1). Countries are divided into quartiles. Shock-specific Spearman rank correlations between oil rents and the post-shock capacity gap are reported below and in companion workbook sheet 15: ρ = −0.26 (p = 0.13) for 2008 GFC, ρ = +0.01 (p = 0.94) for 2014 oil crash, ρ = 0.00 (p = 0.98) for 2020 COVID, ρ = −0.05 (p = 0.62) for 2022 Russia–Ukraine. None reach conventional statistical significance.

# Supplementary Note 10 | Leave-out, quarterly-generation and pre-trend-window sensitivity

The leave-out test in main-article Table 2 defines the top-N economies separately for each shock using capacity at T−1. The fixed-2014 ranking is retained only as a backward-comparison specification.

## Country-quarter generation cross-check

Applying the same descriptive logic to Ember country-quarter solar-plus-wind generation yields a 2020 median of −7.2% (n = 38; 95% CI [−21.0%, +3.5%]) and a 2022 median of −2.8% (n = 50; 95% CI [−10.5%, +4.9%]). Both are negative, but both intervals include zero. Placebo-quarter medians are generally positive and the early-placebo samples are very small. The exercise is therefore directionally consistent with negative short-run deviations but does not independently confirm the annual-capacity findings.

## Pre-trend-window sensitivity

With a six-year rather than four-year pre-trend, t+0 medians are −8.1% for 2008, −16.1% for 2014, −6.4% for 2020 and −8.5% for 2022. The longer window makes all four estimates more negative, especially 2022. A clean six-year placebo comparison cannot be formed from the early panel without either pre-2000 observations or overlap with the named shocks. Consequently, the six-year estimates demonstrate level sensitivity but are not used for the placebo-based headline inference.

## Supplementary Table 5 | Shock-specific top-N identities (T−1 pre-shock capacity)

| **Shock** | **T−1** | **Top-3 (T−1)** | **Top-5 (T−1)** |
| --- | --- | --- | --- |
| 2008 GFC | 2007 | Germany, US, Spain | + India, China |
| 2014 oil | 2013 | China, US, Germany | + Spain, Italy |
| 2020 COVID | 2019 | China, US, Germany | + India, Japan |
| 2022 R–U | 2021 | China, US, Germany | + India, Japan |

# Supplementary Note 11 | Related-literature compilation

This note maps the sources used to position the Analysis. The summaries below describe what each source supports and avoid treating the cited studies as if they estimated the same outcome or design.

## Cross-country panel literature on oil prices and renewable adoption

Omri & Nguyen9 analyse a 64-country panel and report that oil-price increases have a small negative association with renewable-energy consumption in the global and middle-income panels. Murshed & Tanha10 study net oil-importing South Asian economies and report nonlinear relationships that vary across outcomes and countries. Neither study reports the cross-country distribution of deviations around named global shocks.

## Crisis-stimulus literature on the 2008–09 packages

The IEA commentary11 and analysis12 document how clean-energy measures were embedded in post-2008 stimulus programmes, while also emphasizing that ex-post attribution is difficult. The IEA’s Renewables 2020 assessment35 records an uneven COVID-era deployment response: first-half construction and connection rates slowed in many markets, but activity resumed rapidly and renewable electricity remained comparatively resilient. del Río & Mir-Artigues36 is a case study of Spain’s solar-PV investment bubble; it is not evidence about a wind-investment collapse.

## Russia–Ukraine and security-premium literature

The European Commission’s REPowerEU Plan7 sets out the post-invasion policy response and a higher 2030 renewable target. The Bruegel dataset8 catalogues national fiscal responses to the energy crisis; it was first published in 2021 and has been continuously updated. These sources document policy concentration in Europe but do not establish the global causal effect of the 2022 shock.

## Methodological literature

Sun & Abraham21 and Callaway & Sant’Anna22 show why heterogeneous treatment effects complicate causal event-study and difference-in-differences averages. Their estimators are not used here because the shocks are global and there is no untreated comparison group. Abadie, Diamond & Hainmueller32 provides a synthetic-control alternative, but a credible donor pool is likewise unavailable for a global shock. Zhao et al.37 find that geopolitical risk reduces renewable-energy demand in their OECD panel; this differs from our short-run global generation diagnostic in outcome, horizon and design. Way et al.38 concerns long-run technology-cost forecasting, and Aklin & Urpelainen39 provides a political-economy interpretation of shocks and renewable expansion. The SVAR uses sign rotations27 and does not impose narrative restrictions34.

## Broader transition and security context

IRENA and Ember reports40,41 describe the long-run expansion and falling costs of renewable power; the IEA critical-minerals outlook42 documents concentrated upstream and refining supply. IEA investment analysis43, the Our World in Data energy synthesis44 and the energy-security discussion by Bordoff & O’Sullivan45 provide broader context but are not inputs to the event-study estimates.

## Diagnostic-extension literature

Steffen et al.4 provide a 68-country project-level cost-of-capital dataset for 2010–2022. The World Economic Forum Energy Transition Index19 and World Bank RISE framework20 are forward-looking readiness measures that could be compared with the retrospective outcome measure in future work. The IEA affordability report46 supplies the contextual household electrification and bill markers in Supplementary Fig. 3. The systematic review by Kunskaja & Pažėraitė5 motivates the exploratory choice of financing, development, fossil dependence and deployment maturity as candidate correlates; it does not establish causal determinants in this dataset.

# Supplementary Note 12 | Household electrification and energy-affordability markers

This note records published contextual shifts in household energy use and affordability. The International Energy Agency reports that electricity’s share of residential energy use rose from below 20% in 2000 to about 30% globally and 40% in advanced economies by 2024. It also reports that household electricity spending exceeded US$1 trillion for the first time in 2024 and that real household energy bills remained about 4% above 2019 levels after falling from their 2022 peak46. These values are not estimated in this study and do not enter the event-study or diagnostic regressions.

The markers illustrate why contemporary energy shocks need not transmit through household budgets in the same way as earlier oil crises: residential demand is increasingly electrified, while the composition and policy treatment of energy bills have changed. This is interpretive context only. We did not assemble a cross-country energy-cost-share-of-GDP series, and we make no empirical claim about that quantity.


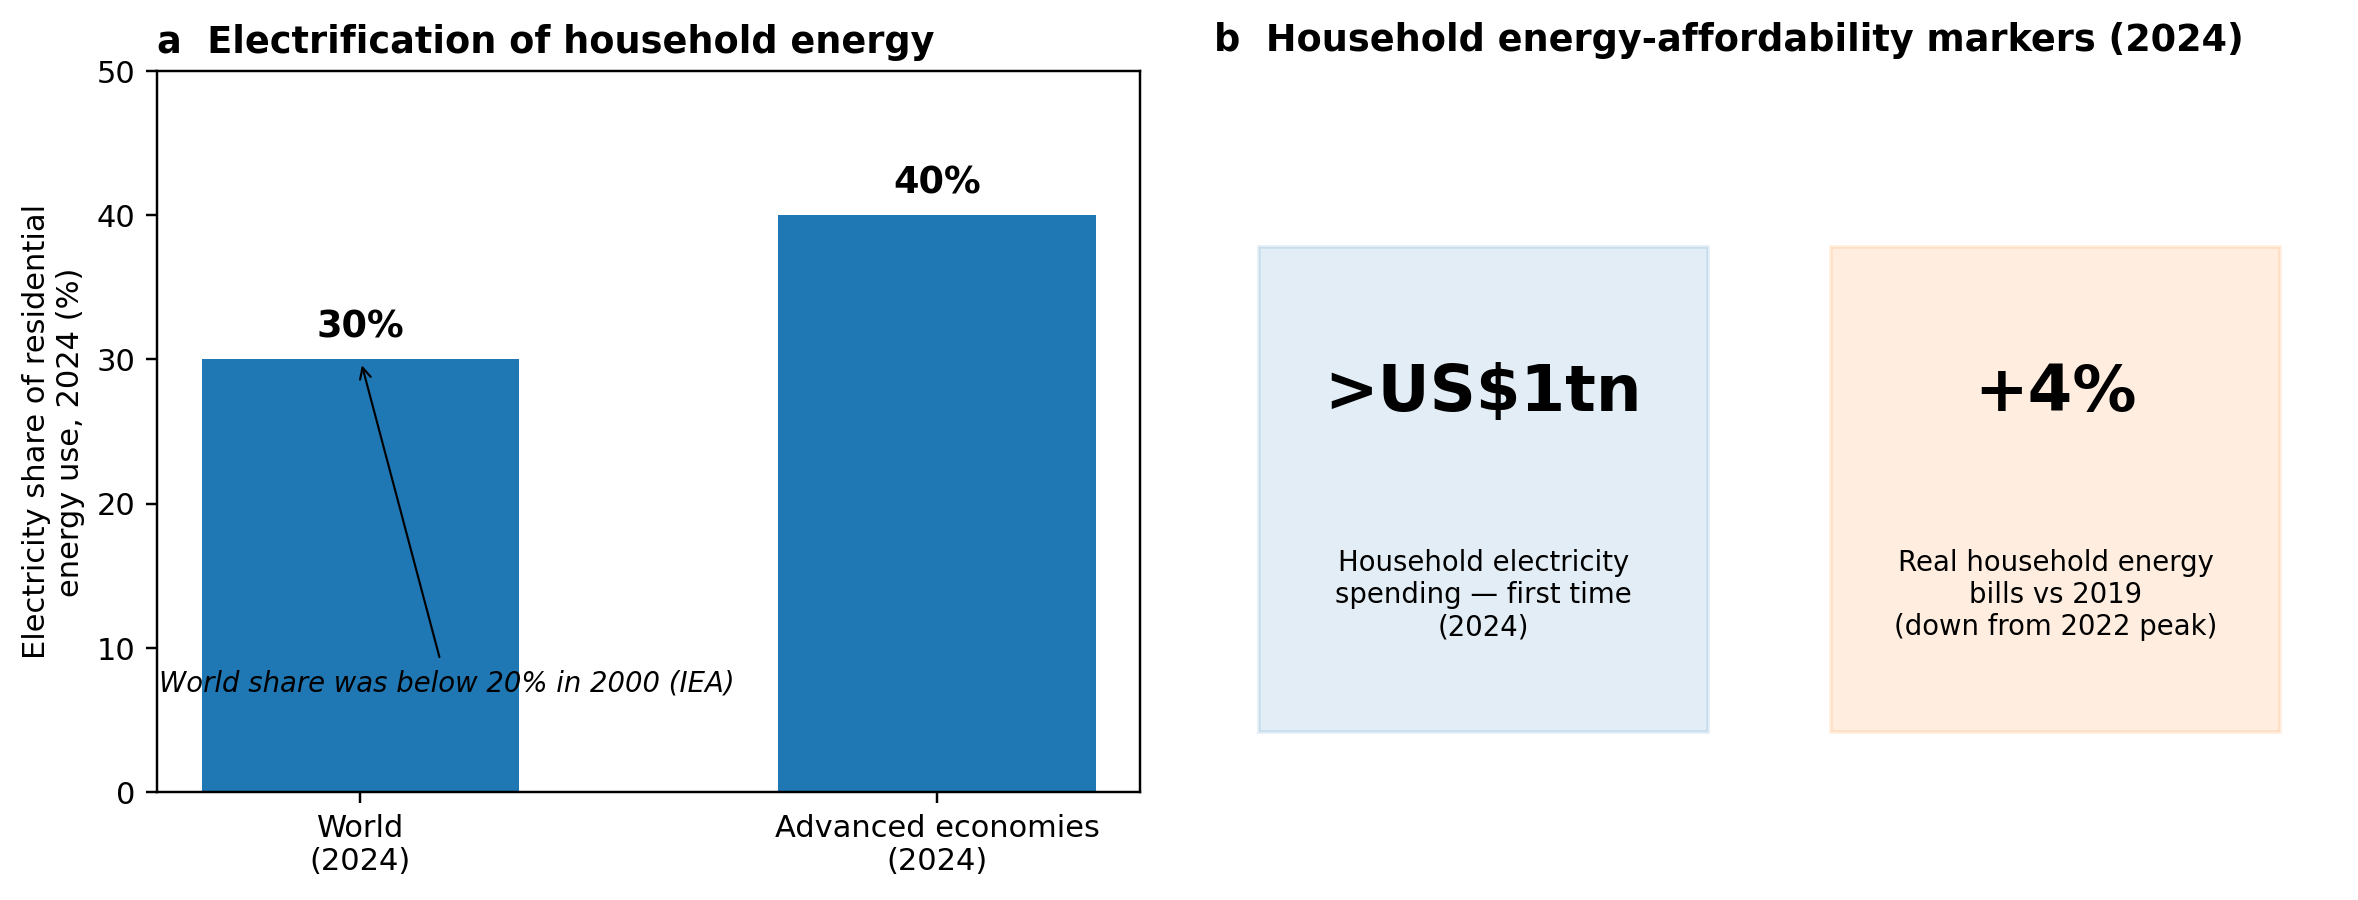


Supplementary Fig. 3 | Household electrification and energy-affordability markers. (a) Electricity’s share of residential energy use in 2024—about 30% for the world and 40% in advanced economies; the world share was below 20% in 2000. (b) Two separately reported affordability markers: household electricity spending exceeded US$1 trillion for the first time in 2024, and real household energy bills remained about 4% above 2019 levels. All values are published IEA figures; none is estimated here. Source: ref. 44.

# Supplementary Note 13 | Exploratory country-level correlates and robustness

The dependent variable is each country’s post-shock capacity gap. Predictors are the fitted pre-shock trend slope, log pre-shock capacity, a static net-oil-exporter indicator, the World Bank FY2026 income group coded 1–4, and the World Bank oil-rents share of GDP. Income groups are current classifications based on 2024 Atlas-method GNI per capita6, not historical T−1 values or direct cost-of-capital observations. Ethiopia and Venezuela are unclassified and omitted; four French overseas territories inherit France’s high-income category. The preferred t+0 model includes 317 country–shock observations from 114 countries, with shock fixed effects and country-clustered standard errors. The pooled model adds horizon fixed effects and contains 951 observations.

Mechanical term. The fitted slope also constructs the projected capacity in the dependent variable. It is therefore a diagnostic of trend-extrapolation geometry rather than an independent structural determinant. A 0.1 increase in annual log pre-shock growth is associated with a 5.3-percentage-point more-negative t+0 gap. The coefficient is negative in every reported specification, but its interpretation is partly mechanical.

Structural terms. With the FY2026 classification, income is positive but not conventionally significant at t+0 (+4.1 pp, p = 0.218) or when horizons are pooled (+10.6 pp, p = 0.051). The exporter coefficient is negative but also imprecise in pooled models (t+0 −9.0 pp, p = 0.102; pooled −13.5 pp, p = 0.092); shock-specific estimates are negative and significant in 2008 and 2022, positive and non-significant in 2020, and imprecise in 2014. Oil rents show no robust linear gradient. These are candidate correlations, not determinants or policy levers.

Sensitivity and outliers. Uruguay’s 2014 t+0 gap is approximately +596%, illustrating the right-skewed outcome distribution. Winsorisation weakens the income coefficient. In median regression, income remains non-significant (+2.2 pp, p = 0.122); exporter status (−12.8 pp, p = 0.029) and fossil rents (+0.8 pp, p = 0.026) are statistically distinguishable, but these isolated quantile results are not corroborated by the mean-regression battery and are treated as exploratory. The income-by-exporter interaction is non-significant (+5.9 pp, p = 0.449).

External validity remains untested. ETI and RISE scores were not merged, so no claim is made that they correlate with or are independent of the retrospective gap measure. The project-level cost-of-capital data in ref. 41 provide a route to a direct financing variable in future work.

## Supplementary Table 6 | Robustness of the exploratory structural-predictor regression. Each cell reports coefficient in percentage points with p-value in parentheses. The first three rows vary the standard-error estimator; shock-specific rows use HC1 errors. The pooled model includes horizon fixed effects. Income enters as an ordinal 1–4 score except in the categorical-income row.

| **Specification** | **n** | **Slope** | **Net oil-exp.** | **Income** | **log cap.** | **Oil rents** |
| --- | --- | --- | --- | --- | --- | --- |
| classical SE | 317 | -52.7 (<0.001) | -9.0 (0.499) | +4.1 (0.213) | -3.1 (0.031) | +0.4 (0.620) |
| HC1 robust SE | 317 | -52.7 (<0.001) | -9.0 (0.120) | +4.1 (0.238) | -3.1 (0.181) | +0.4 (0.481) |
| country-clustered SE (main) | 317 | -52.7 (<0.001) | -9.0 (0.102) | +4.1 (0.218) | -3.1 (0.178) | +0.4 (0.489) |
| income as 4 categories | 317 | -52.3 (<0.001) | -8.8 (0.112) | — (—) | -3.1 (0.172) | +0.4 (0.489) |
| winsorised DV 2.5/97.5 | 317 | -46.4 (<0.001) | -9.5 (0.082) | +1.9 (0.250) | -0.9 (0.257) | +0.7 (0.197) |
| drop 7 largest economies | 289 | -53.3 (<0.001) | -6.6 (0.269) | +5.4 (0.183) | -4.3 (0.179) | +0.3 (0.679) |
| + region fixed effects | 317 | -53.7 (<0.001) | -8.6 (0.206) | +7.6 (0.211) | -3.1 (0.142) | +0.0 (0.962) |
| pooled horizons, clustered | 951 | -97.7 (<0.001) | -13.5 (0.092) | +10.6 (0.051) | -7.8 (0.040) | +0.1 (0.870) |
| 2008 only | 36 | -31.8 (0.042) | -21.9 (0.011) | -3.6 (0.449) | +0.3 (0.856) | -0.3 (0.561) |
| 2014 only | 63 | -78.9 (0.029) | -12.0 (0.391) | +12.0 (0.433) | -11.8 (0.282) | -0.2 (0.889) |
| 2020 only | 106 | -34.5 (0.031) | +7.5 (0.468) | +2.2 (0.500) | +0.7 (0.743) | +0.1 (0.918) |
| 2022 only | 112 | -59.8 (<0.001) | -22.6 (0.013) | +2.6 (0.468) | -2.9 (0.054) | +1.2 (0.160) |

Notes: the categorical-income row has no single ordinal income coefficient. Country-clustered and HC1 p-values differ because the model contains repeated countries across shocks. “pp” denotes percentage points.

# Supplementary Note 14 | Reproducibility

## Environment

Required Python packages and versions:

pandas >= 2.2

numpy >= 1.26

statsmodels >= 0.14

scipy >= 1.13

matplotlib >= 3.8

seaborn >= 0.13

xlrd >= 2.0 (for reading .xls GPR file)

openpyxl >= 3.1 (for reading .xlsx Pink Sheet)

All packages install via standard pip. Python 3.10 or higher recommended.

## Pipeline execution

# Data preparation

python3 01_data/01_build_monthly_panel.py

python3 01_data/02_build_country_quarter.py

python3 01_data/03_extract_alignment.py

python3 02_event_study/code/18_load_fossil_rents.py

# Main event-study analyses

python3 02_event_study/code/11_event_study_country_capacity.py

python3 02_event_study/code/15_major_revision_analysis.py

python3 02_event_study/code/17_ihs_outcome.py

python3 02_event_study/code/24_placebo_strict.py

python3 02_event_study/code/25_window_clean_placebo_and_shock_specific_leaveout.py

# Sign-restricted SVAR

python3 03_var_analysis/code/20_sign_restricted_svar.py

# Figure generation

python3 02_event_study/code/16_figures_major_revision.py

python3 02_event_study/code/22_fossil_rents_figure.py

python3 02_event_study/code/26_figures_v14.py

# Exploratory structural diagnostics

python3 04_extension/e01_recompute_deviations.py

python3 04_extension/e02_structural_regression_v4_2.py

python3 04_extension/e03_robustness_v4_2.py

python3 04_extension/e06_diagnostics_v4_2.py

python3 04_extension/e07_sn12_figure_v4_2.py

# Verification

python3 02_event_study/code/21_consistency_check.py # 132 numeric checks

python3 02_event_study/code/23_full_audit.py # 141 cross-doc checks

Total runtime: approximately three to five minutes on a 2024-vintage laptop.

## Output verification

The repository scripts compare manuscript claims with generated outputs and audit cross-document consistency. The v4.2 extension additionally verifies the official FY2026 income-classification crosswalk, the 317-observation t+0 regression, the 951-observation pooled regression, the full robustness table and diagnostic outputs. The companion workbook is synchronized with these results.

## Companion workbook

The companion workbook contains 33 sheets covering provenance, processed panels, core results, country classifications, bootstrap and SVAR verification, the FY2026 income crosswalk, the structural-analysis panel, Table 3 coefficients, robustness results, diagnostic outputs and an extension audit. Workbook metadata and the accompanying scripts use version 4.2.

# Repository archive

The complete replication package is archived as a private Zenodo draft under the reserved version-specific DOI 10.5281/zenodo.20814306. During peer review, editors and reviewers should use the private Zenodo review link supplied in the submission system. The DOI will resolve when the Zenodo record is published.

# Generative AI and computational assistance

Generative AI tools, including Anthropic Claude and OpenAI ChatGPT, were used during manuscript and Supplementary Information preparation to assist with code drafting and debugging, language editing, figure scripting, reference checking, document organisation and preparation of reproducibility materials. AI tools were not used as authors, did not determine the research question, empirical design, interpretation or conclusions, and were not used to generate scientific images. The human authors selected the methods, executed and independently verified the analyses, checked the underlying data, calculations, factual claims and references, revised and approved the final text, and take full responsibility for the accuracy, originality and integrity of the work.

# Supplementary References

References 1–27 are listed in the main article. References 28–46 below are first introduced in the Supplementary Information and continue the article numbering, in accordance with Nature supplementary-information practice.

**28.** Octopus Energy. Solar and heat pump sales surge as Brits ditch fossil fuels. Press release (March 2026). https://octopus.energy/press/solar-and-heat-pump-sales-surge-as-brits-ditch-fossil-fuels/

**29.** World Bank. Commodity Price Data (The Pink Sheet), historical monthly series. (World Bank, Washington, DC, 2025). https://thedocs.worldbank.org/en/doc/18675f1d1639c7a34d463f59263ba0a2-0050012025/world-bank-commodities-price-data-the-pink-sheet

**30.** Bailey, M. A., Strezhnev, A. & Voeten, E. Estimating dynamic state preferences from UN voting data. Journal of Conflict Resolution 61, 430–456 (2017). https://doi.org/10.1177/0022002715595700

**31.** Kilian, L. Not all oil price shocks are alike. American Economic Review 99, 1053–1069 (2009). https://doi.org/10.1257/aer.99.3.1053

**32.** Abadie, A., Diamond, A. & Hainmueller, J. Synthetic control methods for comparative case studies: estimating the effect of California’s tobacco control program. Journal of the American Statistical Association 105, 493–505 (2010). https://doi.org/10.1198/jasa.2009.ap08746

**33.** Baumeister, C. & Hamilton, J. D. Structural interpretation of vector autoregressions with incomplete identification: revisiting the role of oil supply and demand shocks. American Economic Review 109, 1873–1910 (2019). https://doi.org/10.1257/aer.20151569

**34.** Antolín-Díaz, J. & Rubio-Ramírez, J. F. Narrative sign restrictions for SVARs. American Economic Review 108, 2802–2829 (2018). https://doi.org/10.1257/aer.20161852

**35.** IEA. Renewables 2020: Analysis and forecasts to 2025. (International Energy Agency, Paris, 2020). https://iea.blob.core.windows.net/assets/1a24f1fe-c971-4c25-964a-57d0f31eb97b/Renewables_2020-PDF.pdf

**36.** del Río, P. & Mir-Artigues, P. A cautionary tale: Spain's solar PV investment bubble. (Global Subsidies Initiative, IISD, Geneva, 2014). https://www.iisd.org/sites/default/files/gsi/rens_ct_spain.pdf

**37.** Zhao, Z., Gozgor, G., Lau, M. C. K., Mahalik, M. K., Patel, G. & Khalfaoui, R. The impact of geopolitical risks on renewable energy demand in OECD countries. Energy Economics 122, 106700 (2023). https://doi.org/10.1016/j.eneco.2023.106700

**38.** Way, R., Ives, M. C., Mealy, P. & Farmer, J. D. Empirically grounded technology forecasts and the energy transition. Joule 6, 2057–2082 (2022). https://doi.org/10.1016/j.joule.2022.08.009

**39.** Aklin, M. & Urpelainen, J. Renewables: The Politics of a Global Energy Transition. (MIT Press, Cambridge, MA, 2018). https://doi.org/10.7551/mitpress/11112.001.0001

**40.** Ember. Global Electricity Review 2025. (Ember-Energy, London, 2025). https://ember-energy.org/latest-insights/global-electricity-review-2025/

**41.** IRENA. Renewable Power Generation Costs in 2024. (IRENA, Abu Dhabi, 2025). https://www.irena.org/-/media/Files/IRENA/Agency/Publication/2025/Jul/IRENA_TEC_RPGC_in_2024_2025.pdf

**42.** IEA. Global Critical Minerals Outlook 2024. (International Energy Agency, Paris, 2024). https://www.iea.org/reports/global-critical-minerals-outlook-2024/executive-summary

**43.** IEA. World Energy Investment 2025. (International Energy Agency, Paris, 2025). https://www.iea.org/reports/world-energy-investment-2025

**44.** Ritchie, H., Rosado, P. & Roser, M. Energy. (Our World in Data, 2024). https://ourworldindata.org/energy-production-consumption

**45.** Bordoff, J. & O’Sullivan, M. L. The age of energy insecurity: how the fight for resources is upending geopolitics. Foreign Affairs 102, 104–119 (2023). https://www.foreignaffairs.com/world/energy-insecurity-climate-change-geopolitics-resources

**46.** International Energy Agency. Household Energy Affordability. (IEA, Paris, 2026). https://www.iea.org/reports/household-energy-affordability
